# Supplementary material for: Galactoside in the male ejaculate evaluated as a nuptial gift by the female nutrient sensing neurons
Source: Research Square preprint supplement (doi:10.21203/rs.3.rs-2137467/v1), 2023-01-17
Supplement: Supplementary file 1 [file 730ad75b1ee63927f6b281a8.xlsx]

## Sheet: Table S1
Table S1. CAZyme domain mapping information
target_name	query_name	full_evalue	full_score	full_bias	best_evalue	best_score	best_bias	target annotation: ID	target annotation: name	target annotation: associated genes, transcripts
FBpp0112293	CBM13	8.1e-20	72.7	0.5	1.3e-19	72	0.5	ID=FBpp0112293;	name=Pgant9-PE;	parent=FBgn0050463,FBtr0113381;
FBpp0086259	CBM13	4.7e-19	70.2	0.5	7.6e-19	69.5	0.5	ID=FBpp0086259;	name=Pgant9-PB;	parent=FBgn0050463,FBtr0087113;
FBpp0112291	CBM13	4.7e-19	70.2	0.5	7.6e-19	69.5	0.5	ID=FBpp0112291;	name=Pgant9-PC;	parent=FBgn0050463,FBtr0113379;
FBpp0086258	CBM13	1.4e-16	62.1	0.8	2.3e-16	61.4	0.8	ID=FBpp0086258;	name=Pgant9-PA;	parent=FBgn0050463,FBtr0087112;
FBpp0112292	CBM13	1.4e-16	62.1	0.8	2.3e-16	61.4	0.8	ID=FBpp0112292;	name=Pgant9-PD;	parent=FBgn0050463,FBtr0113380;
FBpp0110323	CBM13	1.3e-15	59	2.8	4.2e-15	57.3	3.1	ID=FBpp0110323;	name=Pgant5-PB;	parent=FBgn0031681,FBtr0111024;
FBpp0078663	CBM13	2e-15	58.3	3.1	4.2e-15	57.3	3.1	ID=FBpp0078663;	name=Pgant5-PA;	parent=FBgn0031681,FBtr0079026;
FBpp0099799	CBM13	6.2e-14	53.5	3.2	7e-14	53.3	1.5	ID=FBpp0099799;	name=Pgant2-PA;	parent=FBgn0031530,FBtr0077592;
FBpp0292961	CBM13	6.2e-14	53.5	3.2	7e-14	53.3	1.5	ID=FBpp0292961;	name=Pgant2-PB;	parent=FBgn0031530,FBtr0303992;
FBpp0309020	CBM13	3.8e-13	50.9	0.9	6.2e-13	50.2	0.9	ID=FBpp0309020;	name=Pgant1-PC;	parent=FBgn0034025,FBtr0340001;
FBpp0086464	CBM13	8.8e-13	49.7	0.9	1.4e-12	49	0.9	ID=FBpp0086464;	name=Pgant1-PA;	parent=FBgn0034025,FBtr0087331;
FBpp0086465	CBM13	8.8e-13	49.7	0.9	1.4e-12	49	0.9	ID=FBpp0086465;	name=Pgant1-PB;	parent=FBgn0034025,FBtr0087332;
FBpp0113016	CBM13	9.1e-13	49.7	0.7	1.6e-12	48.8	0.7	ID=FBpp0113016;	name=Pgant4-PB;	parent=FBgn0051956,FBtr0114524;
FBpp0305447	CBM13	9.1e-13	49.7	0.7	1.6e-12	48.8	0.7	ID=FBpp0305447;	name=Pgant4-PC;	parent=FBgn0051956,FBtr0333248;
FBpp0072842	CBM13	6.7e-12	46.8	7.8	1.3e-11	45.9	7.8	ID=FBpp0072842;	name=Pgant6-PA;	parent=FBgn0035375,FBtr0072972;
FBpp0072843	CBM13	6.7e-12	46.8	7.8	1.3e-11	45.9	7.8	ID=FBpp0072843;	name=Pgant6-PB;	parent=FBgn0035375,FBtr0072973;
FBpp0305633	CBM13	6.7e-12	46.8	7.8	1.3e-11	45.9	7.8	ID=FBpp0305633;	name=Pgant6-PC;	parent=FBgn0035375,FBtr0333442;
FBpp0075331	CBM13	1.5e-11	45.7	3	2.8e-11	44.8	3	ID=FBpp0075331;	name=Pgant8-PA;	parent=FBgn0036529,FBtr0075578;
FBpp0075334	CBM13	5.6e-11	43.8	1.5	9.6e-11	43.1	1.5	ID=FBpp0075334;	name=CG7579-PA;	parent=FBgn0036528,FBtr0075581;
FBpp0088130	CBM13	9.5e-10	39.8	0.1	1.8e-09	38.9	0.1	ID=FBpp0088130;	name=Pgant3-PA;	parent=FBgn0027558,FBtr0089061;
FBpp0080202	CBM13	5.8e-09	37.3	0.6	1.9e-08	35.6	0.7	ID=FBpp0080202;	name=Pgant35A-PA;	parent=FBgn0001970,FBtr0080629;
FBpp0075330	CBM13	5.1e-06	27.7	1.4	1.2e-05	26.5	1.4	ID=FBpp0075330;	name=CG7304-PB;	parent=FBgn0036527,FBtr0075577;
FBpp0074395	CBM13	7e-06	27.2	0.4	1.3e-05	26.3	0.4	ID=FBpp0074395;	name=Pgant7-PA;	parent=FBgn0030930,FBtr0074624;
FBpp0074396	CBM13	7e-06	27.2	0.4	1.3e-05	26.3	0.4	ID=FBpp0074396;	name=Pgant7-PB;	parent=FBgn0030930,FBtr0074625;
FBpp0311917	CBM13	7e-06	27.2	0.4	1.3e-05	26.3	0.4	ID=FBpp0311917;	name=Pgant7-PC;	parent=FBgn0030930,FBtr0346082;
FBpp0305040	CBM14	4.7e-185	600.6	401	1.3e-08	35.6	3.6	ID=FBpp0305040;	name=CG43896-PC;	parent=FBgn0264488,FBtr0332817;
FBpp0311737	CBM14	4.7e-185	600.6	401	1.3e-08	35.6	3.6	ID=FBpp0311737;	name=CG43896-PD;	parent=FBgn0264488,FBtr0345688;
FBpp0075774	CBM14	3.8e-125	408.8	191.4	6.5e-12	46.2	6.6	ID=FBpp0075774;	name=CG17826-PA;	parent=FBgn0036227,FBtr0076042;
FBpp0305039	CBM14	4.6e-110	360.5	260	7.6e-09	36.4	3.6	ID=FBpp0305039;	name=CG43896-PB;	parent=FBgn0264488,FBtr0332816;
FBpp0311235	CBM14	5.5e-105	344.2	145.6	2.9e-11	44.1	2.1	ID=FBpp0311235;	name=teq-PF;	parent=FBgn0023479,FBtr0344980;
FBpp0311236	CBM14	1e-103	340.2	145.6	3.5e-11	43.8	2.1	ID=FBpp0311236;	name=teq-PG;	parent=FBgn0023479,FBtr0344981;
FBpp0291187	CBM14	7e-94	308.6	138.2	2.4e-09	37.9	6.1	ID=FBpp0291187;	name=CG31077-PB;	parent=FBgn0051077,FBtr0301977;
FBpp0306506	CBM14	1.3e-87	288.6	147	2.6e-10	41	5.2	ID=FBpp0306506;	name=Mur89F-PC;	parent=FBgn0038492,FBtr0334403;
FBpp0306505	CBM14	1.3e-87	288.6	147	2.6e-10	41	5.2	ID=FBpp0306505;	name=Mur89F-PB;	parent=FBgn0038492,FBtr0334402;
FBpp0305790	CBM14	3.1e-81	268.2	145.6	4.1e-11	43.6	5.6	ID=FBpp0305790;	name=CG4835-PB;	parent=FBgn0035607,FBtr0333613;
FBpp0075775	CBM14	5.7e-73	241.7	116	3.1e-11	44	4.8	ID=FBpp0075775;	name=CG7248-PA;	parent=FBgn0036229,FBtr0076043;
FBpp0076254	CBM14	1.5e-56	189.1	51.9	5.3e-12	46.5	2.1	ID=FBpp0076254;	name=teq-PC;	parent=FBgn0023479,FBtr0076527;
FBpp0075773	CBM14	7.5e-47	158	87	7.8e-10	39.5	5.8	ID=FBpp0075773;	name=CG7252-PA;	parent=FBgn0036226,FBtr0076041;
FBpp0074627	CBM14	6.2e-42	142.3	63.2	3.6e-09	37.4	7.9	ID=FBpp0074627;	name=CG7290-PA;	parent=FBgn0036949,FBtr0074858;
FBpp0304942	CBM14	6.2e-42	142.3	63.2	3.6e-09	37.4	7.9	ID=FBpp0304942;	name=CG7290-PB;	parent=FBgn0036949,FBtr0332696;
FBpp0089010	CBM14	4e-39	133.3	44.7	1.2e-10	42.2	7.4	ID=FBpp0089010;	name=CG10725-PB;	parent=FBgn0036362,FBtr0089323;
FBpp0110419	CBM14	1.3e-38	131.6	50.4	3.9e-10	40.5	5.2	ID=FBpp0110419;	name=Cht10-PA;	parent=FBgn0250907,FBtr0111127;
FBpp0303592	CBM14	1.3e-38	131.6	50.4	3.9e-10	40.5	5.2	ID=FBpp0303592;	name=Cht10-PB;	parent=FBgn0250907,FBtr0331165;
FBpp0303593	CBM14	1.3e-38	131.6	50.4	3.9e-10	40.5	5.2	ID=FBpp0303593;	name=Cht10-PC;	parent=FBgn0250907,FBtr0331166;
FBpp0075589	CBM14	7.3e-38	129.3	54.5	4.9e-11	43.4	9.9	ID=FBpp0075589;	name=CG10154-PA;	parent=FBgn0036361,FBtr0075854;
FBpp0292212	CBM14	7.3e-38	129.3	54.5	4.9e-11	43.4	9.9	ID=FBpp0292212;	name=CG10154-PB;	parent=FBgn0036361,FBtr0303093;
FBpp0302615	CBM14	3.4e-37	127.1	60	4.1e-09	37.2	6.8	ID=FBpp0302615;	name=CG17147-PB;	parent=FBgn0260393,FBtr0310467;
FBpp0075850	CBM14	1.2e-36	125.3	28.8	2e-11	44.6	3.2	ID=FBpp0075850;	name=Muc68D-PB;	parent=FBgn0036203,FBtr0076119;
FBpp0074625	CBM14	1.7e-36	124.9	47.3	1.9e-08	35	3.1	ID=FBpp0074625;	name=CG7017-PA;	parent=FBgn0036951,FBtr0074856;
FBpp0304941	CBM14	1.7e-36	124.9	47.3	1.9e-08	35	3.1	ID=FBpp0304941;	name=CG7017-PB;	parent=FBgn0036951,FBtr0332695;
FBpp0291861	CBM14	1.6e-35	121.8	54	7.4e-09	36.4	1.5	ID=FBpp0291861;	name=CG6996-PB;	parent=FBgn0036950,FBtr0302721;
FBpp0304937	CBM14	1.6e-35	121.8	54	7.4e-09	36.4	1.5	ID=FBpp0304937;	name=CG6996-PC;	parent=FBgn0036950,FBtr0332691;
FBpp0075588	CBM14	1.7e-35	121.7	50.2	2.2e-10	41.3	7	ID=FBpp0075588;	name=CG10140-PA;	parent=FBgn0036363,FBtr0075853;
FBpp0077026	CBM14	6.6e-34	116.6	36.2	6.8e-12	46.1	7.3	ID=FBpp0077026;	name=obst-A-PA;	parent=FBgn0031097,FBtr0077334;
FBpp0297663	CBM14	6.6e-34	116.6	36.2	6.8e-12	46.1	7.3	ID=FBpp0297663;	name=obst-A-PB;	parent=FBgn0031097,FBtr0306737;
FBpp0074635	CBM14	2e-32	111.9	31.8	2.4e-09	38	1.2	ID=FBpp0074635;	name=obst-J-PA;	parent=FBgn0036940,FBtr0074866;
FBpp0079524	CBM14	3.8e-32	111	33.9	2.2e-11	44.5	4.3	ID=FBpp0079524;	name=obst-B-PA;	parent=FBgn0027600,FBtr0079934;
FBpp0111835	CBM14	2.8e-31	108.2	32.7	2.6e-10	41	8.8	ID=FBpp0111835;	name=Gasp-PB;	parent=FBgn0026077,FBtr0112922;
FBpp0078268	CBM14	3.3e-31	107.9	32.2	2.4e-10	41.1	8.5	ID=FBpp0078268;	name=Gasp-PA;	parent=FBgn0026077,FBtr0078619;
FBpp0074629	CBM14	3.7e-31	107.8	26.4	6e-13	49.5	4.2	ID=FBpp0074629;	name=obst-F-PA;	parent=FBgn0036947,FBtr0074860;
FBpp0423082	CBM14	4.2e-31	107.6	56.8	3.7e-09	37.4	4.8	ID=FBpp0423082;	name=CG5897-PC;	parent=FBgn0036220,FBtr0473619;
FBpp0075795	CBM14	1e-30	106.4	28.4	3.1e-12	47.2	3.4	ID=FBpp0075795;	name=Muc68E-PA;	parent=FBgn0053265,FBtr0076063;
FBpp0075799	CBM14	4.4e-30	104.4	57.4	5.7e-10	39.9	6.4	ID=FBpp0075799;	name=CG5883-PA;	parent=FBgn0036225,FBtr0076067;
FBpp0075798	CBM14	7.8e-30	103.6	24.1	1.8e-10	41.6	5.4	ID=FBpp0075798;	name=obst-G-PA;	parent=FBgn0036228,FBtr0076066;
FBpp0074628	CBM14	1.4e-28	99.6	65.8	2e-08	35	7.5	ID=FBpp0074628;	name=CG7298-PA;	parent=FBgn0036948,FBtr0074859;
FBpp0078794	CBM14	5.9e-28	97.6	31.1	7.5e-10	39.6	6.6	ID=FBpp0078794;	name=obst-E-PA;	parent=FBgn0031737,FBtr0079163;
FBpp0074592	CBM14	6.6e-28	97.4	61.8	5.8e-08	33.5	8.1	ID=FBpp0074592;	name=CG17145-PA;	parent=FBgn0036953,FBtr0074823;
FBpp0304938	CBM14	6.6e-28	97.4	61.8	5.8e-08	33.5	8.1	ID=FBpp0304938;	name=CG17145-PB;	parent=FBgn0036953,FBtr0332692;
FBpp0074622	CBM14	1.2e-27	96.6	63.8	9.5e-07	29.6	7.9	ID=FBpp0074622;	name=CG6933-PA;	parent=FBgn0036952,FBtr0074853;
FBpp0074624	CBM14	1.2e-27	96.6	63.8	9.5e-07	29.6	7.9	ID=FBpp0074624;	name=CG6933-PB;	parent=FBgn0036952,FBtr0074855;
FBpp0304940	CBM14	1.2e-27	96.6	63.8	9.5e-07	29.6	7.9	ID=FBpp0304940;	name=CG6933-PE;	parent=FBgn0036952,FBtr0332694;
FBpp0293993	CBM14	1.4e-27	96.4	24.7	9.8e-11	42.4	2.1	ID=FBpp0293993;	name=CG33986-PB;	parent=FBgn0053986,FBtr0305542;
FBpp0074623	CBM14	1.8e-27	96	64	9.9e-07	29.6	7.9	ID=FBpp0074623;	name=CG6933-PC;	parent=FBgn0036952,FBtr0074854;
FBpp0302616	CBM14	1.8e-27	96	64	9.9e-07	29.6	7.9	ID=FBpp0302616;	name=CG6933-PD;	parent=FBgn0036952,FBtr0310468;
FBpp0078795	CBM14	3.6e-26	91.8	32.6	8.8e-09	36.1	5.6	ID=FBpp0078795;	name=obst-E-PB;	parent=FBgn0031737,FBtr0079164;
FBpp0099395	CBM14	2.8e-24	85.8	34.8	3.1e-09	37.6	7.6	ID=FBpp0099395;	name=obst-H-PA;	parent=FBgn0053983,FBtr0100028;
FBpp0077027	CBM14	1.1e-23	83.9	25.7	5.6e-08	33.6	6.6	ID=FBpp0077027;	name=Peritrophin-A-PA;	parent=FBgn0022770,FBtr0077335;
FBpp0077028	CBM14	1.1e-23	83.9	25.7	5.6e-08	33.6	6.6	ID=FBpp0077028;	name=Peritrophin-A-PB;	parent=FBgn0022770,FBtr0077336;
FBpp0099397	CBM14	1e-22	80.7	34.6	1.7e-10	41.6	3.4	ID=FBpp0099397;	name=CG33985-PA;	parent=FBgn0053985,FBtr0100030;
FBpp0072759	CBM14	1.5e-22	80.3	32.1	5.2e-07	30.5	2.5	ID=FBpp0072759;	name=obst-I-PA;	parent=FBgn0052304,FBtr0072880;
FBpp0288954	CBM14	7.5e-21	74.8	27.4	5.1e-08	33.7	7.4	ID=FBpp0288954;	name=CG42296-PA;	parent=FBgn0259192,FBtr0299676;
FBpp0298359	CBM14	1.2e-20	74.2	14.5	1.4e-10	41.9	3.9	ID=FBpp0298359;	name=Cht6-PF;	parent=FBgn0263132,FBtr0307370;
FBpp0289733	CBM14	1.3e-20	74	15.4	1.8e-10	41.5	4.1	ID=FBpp0289733;	name=CG42397-PA;	parent=FBgn0259748,FBtr0300506;
FBpp0298360	CBM14	1.5e-20	73.8	14.5	1.7e-10	41.6	3.9	ID=FBpp0298360;	name=Cht6-PG;	parent=FBgn0263132,FBtr0307371;
FBpp0076252	CBM14	1.9e-20	73.5	16.1	1.7e-11	44.9	2.1	ID=FBpp0076252;	name=teq-PD;	parent=FBgn0023479,FBtr0076525;
FBpp0302543	CBM14	3.2e-20	72.8	20.6	7.3e-11	42.8	3.1	ID=FBpp0302543;	name=CG43673-PA;	parent=FBgn0263748,FBtr0310395;
FBpp0423041	CBM14	3.2e-20	72.8	35.3	2.4e-11	44.3	10.1	ID=FBpp0423041;	name=CG11570-PC;	parent=FBgn0036230,FBtr0473578;
FBpp0298364	CBM14	1.2e-19	70.9	14.7	5.2e-10	40.1	4.1	ID=FBpp0298364;	name=Cht6-PK;	parent=FBgn0263132,FBtr0307375;
FBpp0298358	CBM14	2e-19	70.2	14.7	6.6e-10	39.8	4.1	ID=FBpp0298358;	name=Cht6-PC;	parent=FBgn0263132,FBtr0307369;
FBpp0072760	CBM14	7.7e-19	68.4	39.6	4.6e-07	30.6	4.5	ID=FBpp0072760;	name=CG32302-PA;	parent=FBgn0052302,FBtr0072881;
FBpp0300563	CBM14	5.2e-17	62.5	18.7	2.7e-08	34.6	6.6	ID=FBpp0300563;	name=Peritrophin-A-PC;	parent=FBgn0022770,FBtr0308243;
FBpp0072758	CBM14	9.9e-17	61.6	38.2	6.4e-10	39.8	4.5	ID=FBpp0072758;	name=CG13806-PA;	parent=FBgn0035325,FBtr0072879;
FBpp0292620	CBM14	1.1e-16	61.5	30.2	1.9e-09	38.2	5.4	ID=FBpp0292620;	name=Mur2B-PB;	parent=FBgn0025390,FBtr0303587;
FBpp0070274	CBM14	3.5e-16	59.8	29.8	3.3e-09	37.5	5.4	ID=FBpp0070274;	name=Mur2B-PA;	parent=FBgn0025390,FBtr0070284;
FBpp0310121	CBM14	3.5e-16	59.8	29.8	3.3e-09	37.5	5.4	ID=FBpp0310121;	name=Mur2B-PC;	parent=FBgn0025390,FBtr0343517;
FBpp0083738	CBM14	3.5e-15	56.7	22.3	1.2e-07	32.6	2.6	ID=FBpp0083738;	name=CG13837-PA;	parent=FBgn0039042,FBtr0084345;
FBpp0297289	CBM14	6.1e-15	55.9	28.3	1.2e-08	35.8	9.1	ID=FBpp0297289;	name=CG43218-PA;	parent=FBgn0262854,FBtr0306159;
FBpp0301166	CBM14	4.6e-13	49.9	6.5	1.7e-12	48.1	6.5	ID=FBpp0301166;	name=Cda5-PH;	parent=FBgn0051973,FBtr0309227;
FBpp0112328	CBM14	6.1e-13	49.5	6.5	2e-12	47.8	6.5	ID=FBpp0112328;	name=Cda5-PE;	parent=FBgn0051973,FBtr0113416;
FBpp0077821	CBM14	6.1e-13	49.5	6.5	2e-12	47.8	6.5	ID=FBpp0077821;	name=Cda5-PA;	parent=FBgn0051973,FBtr0078163;
FBpp0289396	CBM14	1e-12	48.7	8.2	1e-12	48.7	8.2	ID=FBpp0289396;	name=CG13675-PC;	parent=FBgn0035845,FBtr0300119;
FBpp0301164	CBM14	1.1e-12	48.6	6.5	3.2e-12	47.2	6.5	ID=FBpp0301164;	name=Cda5-PF;	parent=FBgn0051973,FBtr0309225;
FBpp0301165	CBM14	1.4e-12	48.3	6.5	3.8e-12	46.9	6.5	ID=FBpp0301165;	name=Cda5-PG;	parent=FBgn0051973,FBtr0309226;
FBpp0301167	CBM14	1.4e-12	48.3	6.5	3.9e-12	46.9	6.5	ID=FBpp0301167;	name=Cda5-PI;	parent=FBgn0051973,FBtr0309228;
FBpp0301168	CBM14	1.4e-12	48.3	6.5	4e-12	46.9	6.5	ID=FBpp0301168;	name=Cda5-PJ;	parent=FBgn0051973,FBtr0309229;
FBpp0077822	CBM14	1.6e-12	48.2	6.5	4.2e-12	46.8	6.5	ID=FBpp0077822;	name=Cda5-PB;	parent=FBgn0051973,FBtr0078164;
FBpp0303120	CBM14	1.8e-12	47.9	8.2	4.7e-12	46.6	8.2	ID=FBpp0303120;	name=CG13675-PD;	parent=FBgn0035845,FBtr0330087;
FBpp0084219	CBM14	3.2e-12	47.1	15.6	8.8e-06	26.5	5.5	ID=FBpp0084219;	name=Muc96D-PA;	parent=FBgn0051439,FBtr0084845;
FBpp0072985	CBM14	7e-12	46.1	7.1	1.6e-11	44.9	7.1	ID=FBpp0072985;	name=Cht7-PA;	parent=FBgn0035398,FBtr0073124;
FBpp0082294	CBM14	1.3e-11	45.2	6.1	2.3e-11	44.4	5.1	ID=FBpp0082294;	name=Cht5-PA;	parent=FBgn0038180,FBtr0082826;
FBpp0075593	CBM14	1.4e-11	45.1	21.1	1.5e-05	25.8	5.6	ID=FBpp0075593;	name=CG33263-PA;	parent=FBgn0053263,FBtr0075859;
FBpp0292311	CBM14	1.6e-11	44.9	4.4	3.5e-11	43.8	4.4	ID=FBpp0292311;	name=thw-PC;	parent=FBgn0037487,FBtr0303219;
FBpp0423077	CBM14	3.6e-11	43.8	20.1	1.9e-07	31.9	6.2	ID=FBpp0423077;	name=CG43294-PC;	parent=FBgn0262986,FBtr0473614;
FBpp0297736	CBM14	3.6e-11	43.8	20.5	1.4e-07	32.3	6.2	ID=FBpp0297736;	name=CG43294-PB;	parent=FBgn0262986,FBtr0306824;
FBpp0071463	CBM14	9.5e-11	42.4	8.4	2.1e-10	41.3	8.4	ID=FBpp0071463;	name=Cht8-PA;	parent=FBgn0034580,FBtr0071534;
FBpp0291540	CBM14	1.3e-10	42	3	1.3e-10	42	3	ID=FBpp0291540;	name=verm-PG;	parent=FBgn0261341,FBtr0302335;
FBpp0298361	CBM14	1.5e-10	41.8	4.1	3e-10	40.9	4.1	ID=FBpp0298361;	name=Cht6-PH;	parent=FBgn0263132,FBtr0307372;
FBpp0298362	CBM14	1.6e-10	41.7	4.1	3.5e-10	40.6	4.1	ID=FBpp0298362;	name=Cht6-PI;	parent=FBgn0263132,FBtr0307373;
FBpp0298363	CBM14	3.2e-10	40.8	4.1	6.4e-10	39.8	4.1	ID=FBpp0298363;	name=Cht6-PJ;	parent=FBgn0263132,FBtr0307374;
FBpp0076314	CBM14	4.3e-10	40.3	15.1	2.2e-06	28.5	2.9	ID=FBpp0076314;	name=CG13312-PA;	parent=FBgn0035931,FBtr0076587;
FBpp0111328	CBM14	1.6e-09	38.5	0.8	4.4e-09	37.1	0.8	ID=FBpp0111328;	name=CG34220-PA;	parent=FBgn0085249,FBtr0112413;
FBpp0078834	CBM14	1.7e-09	38.4	24.2	1.6e-06	28.9	2.3	ID=FBpp0078834;	name=Muc26B-PA;	parent=FBgn0040950,FBtr0079203;
FBpp0111438	CBM14	2e-09	38.2	5.3	9.3e-09	36.1	5.3	ID=FBpp0111438;	name=CG34324-PA;	parent=FBgn0085353,FBtr0112526;
FBpp0077054	CBM14	2e-09	38.2	8.2	2e-09	38.2	8.2	ID=FBpp0077054;	name=Cda4-PA;	parent=FBgn0052499,FBtr0077362;
FBpp0075776	CBM14	2.3e-09	38	6.4	5.7e-09	36.8	6.4	ID=FBpp0075776;	name=CG14125-PA;	parent=FBgn0036232,FBtr0076044;
FBpp0292310	CBM14	2.3e-09	38	5.4	4.2e-09	37.2	5.4	ID=FBpp0292310;	name=CG14607-PB;	parent=FBgn0037488,FBtr0303218;
FBpp0302672	CBM14	2.4e-09	38	6.4	6e-09	36.7	6.4	ID=FBpp0302672;	name=CG14125-PB;	parent=FBgn0036232,FBtr0310535;
FBpp0113017	CBM14	3e-09	37.7	6.3	6.7e-09	36.5	6.3	ID=FBpp0113017;	name=CG32036-PC;	parent=FBgn0052036,FBtr0114525;
FBpp0074721	CBM14	4e-09	37.2	2.6	4e-09	37.2	2.6	ID=FBpp0074721;	name=serp-PB;	parent=FBgn0260653,FBtr0074953;
FBpp0305995	CBM14	4e-09	37.2	2.6	4e-09	37.2	2.6	ID=FBpp0305995;	name=serp-PC;	parent=FBgn0260653,FBtr0333862;
FBpp0292195	CBM14	6.1e-09	36.7	5.1	6.1e-09	36.7	5.1	ID=FBpp0292195;	name=CG42728-PA;	parent=FBgn0261681,FBtr0303076;
FBpp0080449	CBM14	7.1e-09	36.4	3.8	7.1e-09	36.4	3.8	ID=FBpp0080449;	name=ChLD3-PA;	parent=FBgn0032598,FBtr0080892;
FBpp0292196	CBM14	9.3e-09	36.1	3.5	9.3e-09	36.1	3.5	ID=FBpp0292196;	name=CG42729-PA;	parent=FBgn0261682,FBtr0303077;
FBpp0297099	CBM14	1.1e-08	35.9	5.5	1.9e-08	35	5.5	ID=FBpp0297099;	name=CG14304-PC;	parent=FBgn0038629,FBtr0305957;
FBpp0083059	CBM14	1.3e-08	35.6	5.5	2.4e-08	34.7	5.5	ID=FBpp0083059;	name=CG14304-PA;	parent=FBgn0038629,FBtr0083639;
FBpp0112989	CBM14	1.3e-08	35.6	5.5	2.4e-08	34.7	5.5	ID=FBpp0112989;	name=CG14304-PB;	parent=FBgn0038629,FBtr0114497;
FBpp0082770	CBM14	2.1e-08	34.9	4.4	3.7e-08	34.1	4.4	ID=FBpp0082770;	name=CG14880-PA;	parent=FBgn0038422,FBtr0083320;
FBpp0082771	CBM14	2.1e-08	34.9	4.4	3.7e-08	34.1	4.4	ID=FBpp0082771;	name=CG14880-PB;	parent=FBgn0038422,FBtr0083321;
FBpp0071472	CBM14	3e-08	34.5	6.4	3e-08	34.5	6.4	ID=FBpp0071472;	name=Cht4-PA;	parent=FBgn0022700,FBtr0071543;
FBpp0072914	CBM14	3.8e-08	34.1	7.4	6e-08	33.5	7.4	ID=FBpp0072914;	name=ckd-PC;	parent=FBgn0035427,FBtr0073050;
FBpp0303874	CBM14	3.8e-08	34.1	7.4	6e-08	33.5	7.4	ID=FBpp0303874;	name=ckd-PD;	parent=FBgn0035427,FBtr0331457;
FBpp0303875	CBM14	3.8e-08	34.1	7.4	6e-08	33.5	7.4	ID=FBpp0303875;	name=ckd-PE;	parent=FBgn0035427,FBtr0331458;
FBpp0306640	CBM14	5.1e-08	33.7	4.3	1.1e-07	32.6	4.3	ID=FBpp0306640;	name=CG13643-PE;	parent=FBgn0040601,FBtr0334573;
FBpp0297710	CBM14	5.1e-08	33.7	4.3	1.1e-07	32.6	4.3	ID=FBpp0297710;	name=CG13643-PB;	parent=FBgn0040601,FBtr0306798;
FBpp0302610	CBM14	5.1e-08	33.7	4.3	1.1e-07	32.6	4.3	ID=FBpp0302610;	name=CG13643-PC;	parent=FBgn0040601,FBtr0310462;
FBpp0311365	CBM14	6e-08	33.5	1.2	6e-08	33.5	1.2	ID=FBpp0311365;	name=verm-PH;	parent=FBgn0261341,FBtr0345144;
FBpp0288638	CBM14	6.3e-08	33.4	7.2	1.2e-07	32.6	7.2	ID=FBpp0288638;	name=CG14301-PB;	parent=FBgn0038632,FBtr0290199;
FBpp0311366	CBM14	6.4e-08	33.4	1.2	6.4e-08	33.4	1.2	ID=FBpp0311366;	name=verm-PI;	parent=FBgn0261341,FBtr0345145;
FBpp0085964	CBM14	6.5e-08	33.4	4.9	1.1e-07	32.6	4.9	ID=FBpp0085964;	name=CG5756-PB;	parent=FBgn0034301,FBtr0086785;
FBpp0074443	CBM14	8.2e-08	33	5.2	9.9e-06	26.4	0.6	ID=FBpp0074443;	name=Mur18B-PA;	parent=FBgn0030999,FBtr0074672;
FBpp0303036	CBM14	1.2e-07	32.5	4.9	2.1e-07	31.7	4.9	ID=FBpp0303036;	name=CG5756-PC;	parent=FBgn0034301,FBtr0330001;
FBpp0074444	CBM14	1.8e-07	32	9.6	0.006	17.5	4.3	ID=FBpp0074444;	name=Muc18B-PA;	parent=FBgn0031000,FBtr0074673;
FBpp0311892	CBM14	1.8e-07	32	9.6	0.006	17.5	4.3	ID=FBpp0311892;	name=Muc18B-PB;	parent=FBgn0031000,FBtr0346019;
FBpp0084416	CBM14	1.9e-07	31.8	7.4	0.0099	16.8	0.6	ID=FBpp0084416;	name=CG6403-PA;	parent=FBgn0039453,FBtr0085044;
FBpp0308348	CBM14	1.9e-07	31.8	7.4	0.0099	16.8	0.6	ID=FBpp0308348;	name=CG6403-PB;	parent=FBgn0039453,FBtr0339241;
FBpp0072901	CBM14	2.6e-07	31.5	3.9	3.6e-07	31	3.9	ID=FBpp0072901;	name=CG32284-PA;	parent=FBgn0052284,FBtr0073037;
FBpp0111392	CBM14	3.4e-07	31.1	2.1	4.7e-07	30.6	2.1	ID=FBpp0111392;	name=CG34282-PA;	parent=FBgn0085311,FBtr0112478;
FBpp0312473	CBM14	3.4e-07	31.1	2.1	4.7e-07	30.6	2.1	ID=FBpp0312473;	name=CG34282-PB;	parent=FBgn0085311,FBtr0347115;
FBpp0305000	CBM14	3.6e-07	31	4.1	6.7e-07	30.1	4.1	ID=FBpp0305000;	name=CG13676-PB;	parent=FBgn0035844,FBtr0332761;
FBpp0311046	CBM14	3.7e-07	30.9	2.1	8.6e-07	29.8	1.9	ID=FBpp0311046;	name=mtg-PG;	parent=FBgn0260386,FBtr0344713;
FBpp0311047	CBM14	3.7e-07	30.9	2.1	8.6e-07	29.8	1.9	ID=FBpp0311047;	name=mtg-PH;	parent=FBgn0260386,FBtr0344714;
FBpp0300633	CBM14	3.7e-07	30.9	3.6	6.2e-07	30.2	3.6	ID=FBpp0300633;	name=CG12009-PB;	parent=FBgn0035430,FBtr0308314;
FBpp0072917	CBM14	3.8e-07	30.9	3.6	6.6e-07	30.2	3.6	ID=FBpp0072917;	name=CG12009-PA;	parent=FBgn0035430,FBtr0073053;
FBpp0071473	CBM14	4.1e-07	30.8	4.6	9.3e-07	29.7	4.6	ID=FBpp0071473;	name=Cht12-PA;	parent=FBgn0050293,FBtr0071544;
FBpp0301782	CBM14	5e-07	30.5	1.8	1.1e-06	29.4	1.7	ID=FBpp0301782;	name=mtg-PF;	parent=FBgn0260386,FBtr0310081;
FBpp0076455	CBM14	5.2e-07	30.5	4.1	9.5e-07	29.6	4.1	ID=FBpp0076455;	name=CG13676-PA;	parent=FBgn0035844,FBtr0076732;
FBpp0301781	CBM14	5.4e-07	30.4	1.8	1.2e-06	29.3	1.7	ID=FBpp0301781;	name=mtg-PE;	parent=FBgn0260386,FBtr0310080;
FBpp0306639	CBM14	6.8e-07	30.1	2.7	1.6e-06	28.9	2.7	ID=FBpp0306639;	name=CG13643-PD;	parent=FBgn0040601,FBtr0334572;
FBpp0304315	CBM14	4.6e-06	27.4	3.8	6.6e-06	26.9	3.7	ID=FBpp0304315;	name=Peritrophin-15b-PB;	parent=FBgn0040958,FBtr0331993;
FBpp0079319	CBM14	4.8e-06	27.4	3.7	6.8e-06	26.9	3.7	ID=FBpp0079319;	name=Peritrophin-15b-PA;	parent=FBgn0040958,FBtr0079714;
FBpp0304316	CBM14	4.8e-06	27.4	3.7	6.8e-06	26.9	3.7	ID=FBpp0304316;	name=Peritrophin-15b-PC;	parent=FBgn0040958,FBtr0331994;
FBpp0292518	CBM14	6.2e-06	27	2.8	9.4e-06	26.5	2.8	ID=FBpp0292518;	name=CG14244-PB;	parent=FBgn0040607,FBtr0303466;
FBpp0289810	CBM14	7.8e-06	26.7	20.6	0.00086	20.2	6.5	ID=FBpp0289810;	name=CG42494-PA;	parent=FBgn0260026,FBtr0300583;
FBpp0289811	CBM14	7.8e-06	26.7	20.6	0.00086	20.2	6.5	ID=FBpp0289811;	name=CG42494-PB;	parent=FBgn0260026,FBtr0300584;
FBpp0311129	CBM14	7.8e-06	26.7	20.6	0.00086	20.2	6.5	ID=FBpp0311129;	name=CG42494-PC;	parent=FBgn0260026,FBtr0344804;
FBpp0077226	CBM20	1.7e-13	51.3	0.1	3.7e-13	50.2	0.1	ID=FBpp0077226;	name=CG2818-PA;	parent=FBgn0031566,FBtr0077537;
FBpp0071495	CBM20	1.4e-11	45.2	0	2.9e-11	44.1	0	ID=FBpp0071495;	name=CG9394-PA;	parent=FBgn0034588,FBtr0071567;
FBpp0311511	CBM20	1.4e-11	45.2	0	2.9e-11	44.1	0	ID=FBpp0311511;	name=CG9394-PB;	parent=FBgn0034588,FBtr0345356;
FBpp0074813	CBM20	3.1e-10	40.9	0	7.4e-10	39.6	0	ID=FBpp0074813;	name=CG11619-PA;	parent=FBgn0036836,FBtr0075046;
FBpp0074810	CBM20	4.1e-10	40.4	0	8.4e-10	39.5	0	ID=FBpp0074810;	name=CG18135-PB;	parent=FBgn0036837,FBtr0075043;
FBpp0304897	CBM20	4.2e-10	40.4	0	8.6e-10	39.4	0	ID=FBpp0304897;	name=CG18135-PE;	parent=FBgn0036837,FBtr0332651;
FBpp0074809	CBM20	4.3e-10	40.4	0	8.7e-10	39.4	0	ID=FBpp0074809;	name=CG18135-PA;	parent=FBgn0036837,FBtr0075042;
FBpp0074811	CBM20	4.8e-10	40.2	0	9.8e-10	39.2	0	ID=FBpp0074811;	name=CG18135-PC;	parent=FBgn0036837,FBtr0075044;
FBpp0074812	CBM20	5.4e-10	40.1	0	1.1e-09	39.1	0	ID=FBpp0074812;	name=CG18135-PD;	parent=FBgn0036837,FBtr0075045;
FBpp0082033	CBM20	1.2e-07	32.6	0	2.4e-07	31.6	0	ID=FBpp0082033;	name=CG3942-PA;	parent=FBgn0038008,FBtr0082561;
FBpp0075466	CBM21	4.6e-31	108.2	1.6	7e-31	107.6	1.6	ID=FBpp0075466;	name=Gbs-70E-PA;	parent=FBgn0036428,FBtr0075723;
FBpp0075467	CBM21	6e-31	107.8	1.6	9.4e-31	107.2	1.6	ID=FBpp0075467;	name=Gbs-70E-PB;	parent=FBgn0036428,FBtr0075724;
FBpp0305251	CBM21	6e-31	107.8	1.6	9.4e-31	107.2	1.6	ID=FBpp0305251;	name=Gbs-70E-PC;	parent=FBgn0036428,FBtr0333037;
FBpp0074781	CBM21	2e-26	93.3	1	2e-26	93.3	1	ID=FBpp0074781;	name=Gbs-76A-PA;	parent=FBgn0036862,FBtr0075014;
FBpp0303842	CBM21	2e-26	93.3	1	2e-26	93.3	1	ID=FBpp0303842;	name=Gbs-76A-PB;	parent=FBgn0036862,FBtr0331425;
FBpp0304465	CBM21	2e-26	93.3	1	2e-26	93.3	1	ID=FBpp0304465;	name=Gbs-76A-PC;	parent=FBgn0036862,FBtr0332155;
FBpp0311540	CBM21	2e-26	93.3	1	2e-26	93.3	1	ID=FBpp0311540;	name=Gbs-76A-PD;	parent=FBgn0036862,FBtr0345390;
FBpp0071426	CBM32	2.4e-20	73.9	0.6	9.2e-09	36.5	0.2	ID=FBpp0071426;	name=BTBD9-PA;	parent=FBgn0030228,FBtr0071497;
FBpp0306532	CBM32	2.4e-20	73.9	0.6	9.2e-09	36.5	0.2	ID=FBpp0306532;	name=BTBD9-PB;	parent=FBgn0030228,FBtr0334456;
FBpp0288558	CBM32	1.1e-08	36.3	0	0.0046	18.1	0	ID=FBpp0288558;	name=uif-PB;	parent=FBgn0031879,FBtr0290119;
FBpp0308723	CBM32	1.1e-08	36.3	0	0.0046	18.1	0	ID=FBpp0308723;	name=uif-PG;	parent=FBgn0031879,FBtr0339664;
FBpp0291372	CBM32	1.1e-08	36.3	0	0.0046	18.1	0	ID=FBpp0291372;	name=uif-PC;	parent=FBgn0031879,FBtr0302162;
FBpp0297915	CBM32	1.1e-08	36.3	0	0.0046	18.1	0	ID=FBpp0297915;	name=uif-PD;	parent=FBgn0031879,FBtr0307072;
FBpp0297916	CBM32	1.1e-08	36.3	0	0.0046	18.1	0	ID=FBpp0297916;	name=uif-PE;	parent=FBgn0031879,FBtr0307073;
FBpp0297917	CBM32	1.1e-08	36.3	0	0.0046	18.1	0	ID=FBpp0297917;	name=uif-PF;	parent=FBgn0031879,FBtr0307074;
FBpp0305234	CBM32	1.1e-07	33.1	0	0.003	18.7	0	ID=FBpp0305234;	name=Hml-PB;	parent=FBgn0029167,FBtr0333020;
FBpp0075495	CBM32	1.1e-07	33.1	0	0.003	18.7	0	ID=FBpp0075495;	name=Hml-PA;	parent=FBgn0029167,FBtr0075753;
FBpp0075730	CBM32	6e-07	30.7	0.2	1.2e-05	26.4	0.1	ID=FBpp0075730;	name=Nrx-IV-PA;	parent=FBgn0013997,FBtr0075998;
FBpp0075731	CBM32	7.5e-06	27.1	0.1	0.00016	22.9	0.1	ID=FBpp0075731;	name=Nrx-IV-PB;	parent=FBgn0013997,FBtr0075999;
FBpp0306552	CBM37	2.9e-14	53.7	16.4	1.2	10.1	0.1	ID=FBpp0306552;	name=bt-PH;	parent=FBgn0005666,FBtr0334482;
FBpp0311242	CBM37	4.9e-14	52.9	16.6	1.2	10	0.1	ID=FBpp0311242;	name=bt-PJ;	parent=FBgn0005666,FBtr0344988;
FBpp0088734	CBM37	5.3e-14	52.8	16.6	1.2	10	0.1	ID=FBpp0088734;	name=bt-PC;	parent=FBgn0005666,FBtr0089793;
FBpp0306553	CBM37	7.6e-14	52.3	16.6	1.2	10	0.1	ID=FBpp0306553;	name=bt-PI;	parent=FBgn0005666,FBtr0334483;
FBpp0290554	CBM37	8.6e-14	52.2	16.6	1.3	10	0.1	ID=FBpp0290554;	name=bt-PF;	parent=FBgn0005666,FBtr0301340;
FBpp0070693	CBM37	4.5e-09	37	5.1	3.8	8.5	0.1	ID=FBpp0070693;	name=Ptp4E-PB;	parent=FBgn0004368,FBtr0070725;
FBpp0310132	CBM37	4.8e-09	37	5.1	3.8	8.5	0.1	ID=FBpp0310132;	name=Ptp4E-PG;	parent=FBgn0004368,FBtr0343528;
FBpp0310133	CBM37	4.5e-08	33.8	7.2	4.1	8.3	0.1	ID=FBpp0310133;	name=Ptp4E-PH;	parent=FBgn0004368,FBtr0343529;
FBpp0070692	CBM37	4.6e-08	33.8	7.2	4.2	8.3	0.1	ID=FBpp0070692;	name=Ptp4E-PA;	parent=FBgn0004368,FBtr0070724;
FBpp0291007	CBM37	4.6e-08	33.8	7.2	4.2	8.3	0.1	ID=FBpp0291007;	name=Ptp4E-PC;	parent=FBgn0004368,FBtr0301793;
FBpp0291008	CBM37	4.6e-08	33.8	7.2	4.2	8.3	0.1	ID=FBpp0291008;	name=Ptp4E-PD;	parent=FBgn0004368,FBtr0301794;
FBpp0291010	CBM37	4.6e-08	33.8	7.2	4.2	8.3	0.1	ID=FBpp0291010;	name=Ptp4E-PF;	parent=FBgn0004368,FBtr0301796;
FBpp0303420	CBM37	1.7e-06	28.8	13.4	8.3	7.4	0.1	ID=FBpp0303420;	name=Ptp10D-PH;	parent=FBgn0004370,FBtr0330394;
FBpp0271743	CBM37	3.4e-06	27.8	15.4	7.7	7.5	0.1	ID=FBpp0271743;	name=Ptp10D-PE;	parent=FBgn0004370,FBtr0273235;
FBpp0303823	CBM37	3.4e-06	27.8	15.4	7.7	7.5	0.1	ID=FBpp0303823;	name=Ptp10D-PI;	parent=FBgn0004370,FBtr0331406;
FBpp0073369	CBM37	4e-06	27.6	15	8.1	7.4	0.1	ID=FBpp0073369;	name=Ptp10D-PB;	parent=FBgn0004370,FBtr0073522;
FBpp0303418	CBM37	5.4e-06	27.2	12.8	10	7.1	0.1	ID=FBpp0303418;	name=Ptp10D-PF;	parent=FBgn0004370,FBtr0330392;
FBpp0303419	CBM37	5.4e-06	27.2	12.8	10	7.1	0.1	ID=FBpp0303419;	name=Ptp10D-PG;	parent=FBgn0004370,FBtr0330393;
FBpp0076237	CBM39	6.3e-41	139.1	0	1.3e-40	138.1	0	ID=FBpp0076237;	name=GNBP3-PA;	parent=FBgn0040321,FBtr0076510;
FBpp0085578	CBM39	1.5e-40	137.9	0	1.7e-40	137.7	0	ID=FBpp0085578;	name=CG30148-PA;	parent=FBgn0050148,FBtr0086266;
FBpp0309587	CBM39	1.5e-40	137.9	0	1.7e-40	137.7	0	ID=FBpp0309587;	name=CG30148-PB;	parent=FBgn0050148,FBtr0342706;
FBpp0085532	CBM39	2.5e-37	127.5	0.1	3.2e-37	127.2	0.1	ID=FBpp0085532;	name=GNBP-like3-PA;	parent=FBgn0034511,FBtr0086214;
FBpp0074817	CBM39	2.2e-33	114.9	0	7e-24	84.4	0	ID=FBpp0074817;	name=GNBP1-PA;	parent=FBgn0040323,FBtr0075050;
FBpp0087815	CBM39	1.1e-32	112.7	0	1.3e-32	112.4	0	ID=FBpp0087815;	name=CG12780-PA;	parent=FBgn0033301,FBtr0088736;
FBpp0074861	CBM39	7.3e-21	74.8	0.2	5.2e-18	65.6	0.1	ID=FBpp0074861;	name=GNBP2-PB;	parent=FBgn0040322,FBtr0075094;
FBpp0074862	CBM39	2.5e-18	66.6	0.2	2.1e-15	57.2	0.1	ID=FBpp0074862;	name=GNBP2-PA;	parent=FBgn0040322,FBtr0075095;
FBpp0074863	CBM39	1.2e-08	35.7	0.1	1.2e-05	26	0	ID=FBpp0074863;	name=GNBP2-PD;	parent=FBgn0040322,FBtr0075096;
FBpp0073424	CBM47	3.1e-30	105.4	0	7.4e-30	104.2	0	ID=FBpp0073424;	name=fw-PA;	parent=FBgn0001083,FBtr0073580;
FBpp0309601	CBM47	3.1e-30	105.4	0	7.4e-30	104.2	0	ID=FBpp0309601;	name=fw-PC;	parent=FBgn0001083,FBtr0342733;
FBpp0111897	CBM47	1.4e-25	90.3	0	7.7e-25	88	0	ID=FBpp0111897;	name=CG9095-PB;	parent=FBgn0030617,FBtr0112984;
FBpp0073843	CBM47	3e-25	89.3	0	6e-25	88.3	0	ID=FBpp0073843;	name=CG9095-PA;	parent=FBgn0030617,FBtr0074026;
FBpp0309356	CBM47	3e-25	89.3	0	6e-25	88.3	0	ID=FBpp0309356;	name=CG9095-PD;	parent=FBgn0030617,FBtr0340410;
FBpp0303428	CBM47	3.1e-25	89.3	0	6.1e-25	88.3	0	ID=FBpp0303428;	name=CG9095-PC;	parent=FBgn0030617,FBtr0330402;
FBpp0086845	CBM48	6.6e-06	27.4	0	1.7e-05	26	0	ID=FBpp0086845;	name=AGBE-PA;	parent=FBgn0053138,FBtr0087732;
FBpp0099567	CBM50	5.5e-08	33.8	0	1.8e-07	32.1	0	ID=FBpp0099567;	name=mtd-PM;	parent=FBgn0013576,FBtr0100197;
FBpp0110232	CBM50	5.6e-08	33.8	0	1.8e-07	32.1	0	ID=FBpp0110232;	name=mtd-PO;	parent=FBgn0013576,FBtr0110932;
FBpp0089229	CBM50	5.7e-08	33.7	0	1.9e-07	32.1	0	ID=FBpp0089229;	name=mtd-PG;	parent=FBgn0013576,FBtr0078818;
FBpp0078455	CBM50	5.8e-08	33.7	0	1.9e-07	32.1	0	ID=FBpp0078455;	name=mtd-PK;	parent=FBgn0013576,FBtr0078812;
FBpp0271940	CBM50	6.4e-08	33.6	0	2e-07	32	0	ID=FBpp0271940;	name=mtd-PS;	parent=FBgn0013576,FBtr0273432;
FBpp0271941	CBM50	6.4e-08	33.6	0	2e-07	32	0	ID=FBpp0271941;	name=mtd-PT;	parent=FBgn0013576,FBtr0273433;
FBpp0300804	CBM50	6.6e-08	33.5	0	2.1e-07	32	0	ID=FBpp0300804;	name=mtd-PX;	parent=FBgn0013576,FBtr0308580;
FBpp0297634	CBM50	7.1e-08	33.4	0	2.2e-07	31.9	0	ID=FBpp0297634;	name=mtd-PW;	parent=FBgn0013576,FBtr0306695;
FBpp0271942	CBM50	7.5e-08	33.4	0	2.3e-07	31.8	0	ID=FBpp0271942;	name=mtd-PU;	parent=FBgn0013576,FBtr0273434;
FBpp0078453	CBM50	7.7e-08	33.3	0	2.4e-07	31.8	0	ID=FBpp0078453;	name=mtd-PB;	parent=FBgn0013576,FBtr0078810;
FBpp0078454	CBM50	7.7e-08	33.3	0	2.4e-07	31.8	0	ID=FBpp0078454;	name=mtd-PJ;	parent=FBgn0013576,FBtr0078811;
FBpp0099569	CBM50	7.7e-08	33.3	0	2.4e-07	31.8	0	ID=FBpp0099569;	name=mtd-PN;	parent=FBgn0013576,FBtr0100199;
FBpp0110233	CBM50	8.2e-08	33.2	0	2.4e-07	31.7	0	ID=FBpp0110233;	name=mtd-PP;	parent=FBgn0013576,FBtr0110933;
FBpp0297633	CBM50	8.4e-08	33.2	0	2.5e-07	31.7	0	ID=FBpp0297633;	name=mtd-PV;	parent=FBgn0013576,FBtr0306694;
FBpp0088020	CBM50	6.2e-07	30.4	0	1.1e-06	29.7	0	ID=FBpp0088020;	name=CG17985-PA;	parent=FBgn0033199,FBtr0088946;
FBpp0082382	CBM50	9.8e-07	29.8	0	3.3e-06	28.1	0	ID=FBpp0082382;	name=red-PA;	parent=FBgn0285913,FBtr0082923;
FBpp0301703	CBM50	9.8e-07	29.8	0	3.3e-06	28.1	0	ID=FBpp0301703;	name=red-PD;	parent=FBgn0285913,FBtr0309997;
FBpp0301704	CBM50	9.8e-07	29.8	0	3.3e-06	28.1	0	ID=FBpp0301704;	name=red-PE;	parent=FBgn0285913,FBtr0309998;
FBpp0082380	CBM50	1e-06	29.7	0	3.6e-06	28	0	ID=FBpp0082380;	name=red-PB;	parent=FBgn0285913,FBtr0082921;
FBpp0082381	CBM50	1e-06	29.7	0	3.6e-06	28	0	ID=FBpp0082381;	name=red-PC;	parent=FBgn0285913,FBtr0082922;
FBpp0301705	CBM50	1e-06	29.7	0	3.6e-06	28	0	ID=FBpp0301705;	name=red-PF;	parent=FBgn0285913,FBtr0309999;
FBpp0310570	CBM50	1e-06	29.7	0	3.6e-06	28	0	ID=FBpp0310570;	name=red-PG;	parent=FBgn0285913,FBtr0344157;
FBpp0080994	CBM57	5.4e-34	118.2	0.1	9.3e-34	117.4	0.1	ID=FBpp0080994;	name=CG9257-PA;	parent=FBgn0032916,FBtr0081465;
FBpp0075193	CE13	5.1e-103	345.6	0	5.6e-102	342.1	0	ID=FBpp0075193;	name=Notum-PA;	parent=FBgn0044028,FBtr0075435;
FBpp0298346	CE14	6.7e-13	50.2	0	1.1e-12	49.6	0	ID=FBpp0298346;	name=PIG-L-PC;	parent=FBgn0038763,FBtr0307345;
FBpp0083252	CE14	6.8e-13	50.2	0	1.1e-12	49.6	0	ID=FBpp0083252;	name=PIG-L-PB;	parent=FBgn0038763,FBtr0083843;
FBpp0310553	CE14	6.8e-13	50.2	0	1.1e-12	49.6	0	ID=FBpp0310553;	name=PIG-L-PD;	parent=FBgn0038763,FBtr0344139;
FBpp0083246	CE1	1.3e-47	163.2	0	1.5e-47	163	0	ID=FBpp0083246;	name=CG4390-PA;	parent=FBgn0038771,FBtr0083837;
FBpp0083245	CE1	2e-47	162.6	0	2.5e-47	162.3	0	ID=FBpp0083245;	name=CG4390-PB;	parent=FBgn0038771,FBtr0083836;
FBpp0088584	CE1	2e-13	51.4	0.2	4.1e-13	50.4	0.2	ID=FBpp0088584;	name=CG11319-PA;	parent=FBgn0031835,FBtr0089641;
FBpp0309855	CE1	2e-13	51.4	0.2	4.1e-13	50.4	0.2	ID=FBpp0309855;	name=CG11319-PC;	parent=FBgn0031835,FBtr0343160;
FBpp0309854	CE1	2e-13	51.4	0.2	3.9e-13	50.4	0.2	ID=FBpp0309854;	name=CG11319-PB;	parent=FBgn0031835,FBtr0343159;
FBpp0305257	CE1	3.2e-11	44.2	0.3	8.2e-11	42.8	0.3	ID=FBpp0305257;	name=ome-PH;	parent=FBgn0259175,FBtr0333043;
FBpp0288925	CE1	3.3e-11	44.1	0.3	8.6e-11	42.8	0.3	ID=FBpp0288925;	name=ome-PF;	parent=FBgn0259175,FBtr0299650;
FBpp0288924	CE1	4.1e-11	43.8	0.3	1.1e-10	42.4	0.3	ID=FBpp0288924;	name=ome-PE;	parent=FBgn0259175,FBtr0299649;
FBpp0288926	CE1	4.8e-11	43.6	0.3	1.4e-10	42.1	0.3	ID=FBpp0288926;	name=ome-PG;	parent=FBgn0259175,FBtr0299651;
FBpp0306641	CE1	5.2e-10	40.2	0.1	1.3e-09	38.9	0.1	ID=FBpp0306641;	name=CG3744-PD;	parent=FBgn0039240,FBtr0334574;
FBpp0306644	CE1	5.2e-10	40.2	0.1	1.3e-09	38.9	0.1	ID=FBpp0306644;	name=CG3744-PG;	parent=FBgn0039240,FBtr0334577;
FBpp0306642	CE1	5.2e-10	40.2	0.1	1.2e-09	39	0.1	ID=FBpp0306642;	name=CG3744-PE;	parent=FBgn0039240,FBtr0334575;
FBpp0306643	CE1	5.2e-10	40.2	0.1	1.2e-09	39	0.1	ID=FBpp0306643;	name=CG3744-PF;	parent=FBgn0039240,FBtr0334576;
FBpp0086362	CE1	1.1e-09	39.2	0	1.7e-09	38.6	0	ID=FBpp0086362;	name=Jhe-PA;	parent=FBgn0010052,FBtr0087223;
FBpp0290965	CE1	1.1e-09	39.2	0	1.7e-09	38.6	0	ID=FBpp0290965;	name=Jhe-PB;	parent=FBgn0010052,FBtr0301751;
FBpp0309035	CE1	1.1e-09	39.2	0	1.7e-09	38.6	0	ID=FBpp0309035;	name=Jhe-PC;	parent=FBgn0010052,FBtr0340021;
FBpp0071604	CE1	1.2e-08	35.7	0	1.7e-08	35.2	0	ID=FBpp0071604;	name=clt-PA;	parent=FBgn0000326,FBtr0071687;
FBpp0086361	CE1	1.7e-08	35.3	0	2.6e-08	34.6	0	ID=FBpp0086361;	name=Jhedup-PA;	parent=FBgn0034076,FBtr0087222;
FBpp0303935	CE1	9e-08	32.9	0	1.3e-07	32.4	0	ID=FBpp0303935;	name=Apt1-PE;	parent=FBgn0042138,FBtr0331545;
FBpp0303934	CE1	1.2e-07	32.5	0	1.5e-07	32.2	0	ID=FBpp0303934;	name=Apt1-PD;	parent=FBgn0042138,FBtr0331544;
FBpp0075834	CE1	1.4e-07	32.3	0	1.9e-07	31.8	0	ID=FBpp0075834;	name=Apt1-PA;	parent=FBgn0042138,FBtr0076103;
FBpp0075835	CE1	1.4e-07	32.3	0	1.9e-07	31.8	0	ID=FBpp0075835;	name=Apt1-PB;	parent=FBgn0042138,FBtr0076104;
FBpp0075836	CE1	1.4e-07	32.3	0	1.9e-07	31.8	0	ID=FBpp0075836;	name=Apt1-PC;	parent=FBgn0042138,FBtr0076105;
FBpp0081065	CE1	1.5e-07	32.2	0	3.4e-07	31	0	ID=FBpp0081065;	name=Nlg1-PD;	parent=FBgn0051146,FBtr0081541;
FBpp0297111	CE1	1.5e-07	32.2	0	3.4e-07	31	0	ID=FBpp0297111;	name=Nlg1-PE;	parent=FBgn0051146,FBtr0305969;
FBpp0112129	CE1	1.9e-07	31.9	0	2.4e-07	31.5	0	ID=FBpp0112129;	name=CG6567-PB;	parent=FBgn0037842,FBtr0113217;
FBpp0297739	CE1	5.4e-07	30.4	0.1	1e-06	29.4	0.1	ID=FBpp0297739;	name=CG11034-PB;	parent=FBgn0031741,FBtr0306841;
FBpp0309549	CE1	5.4e-07	30.4	0.1	1e-06	29.4	0.1	ID=FBpp0309549;	name=CG11034-PC;	parent=FBgn0031741,FBtr0342609;
FBpp0070594	CE1	6.1e-07	30.2	0	1.1e-06	29.3	0	ID=FBpp0070594;	name=CG6414-PA;	parent=FBgn0029690,FBtr0070624;
FBpp0401489	CE1	6.1e-07	30.2	0	1.1e-06	29.3	0	ID=FBpp0401489;	name=CG6414-PB;	parent=FBgn0029690,FBtr0445312;
FBpp0310524	CE1	6.3e-07	30.1	0	1.2e-06	29.2	0	ID=FBpp0310524;	name=CG45002-PF;	parent=FBgn0266354,FBtr0344099;
FBpp0289380	CE1	6.4e-07	30.1	0.1	5.1e-06	27.2	0	ID=FBpp0289380;	name=CG17684-PC;	parent=FBgn0263780,FBtr0300103;
FBpp0310527	CE1	6.4e-07	30.1	0	1.2e-06	29.2	0	ID=FBpp0310527;	name=CG45002-PI;	parent=FBgn0266354,FBtr0344102;
FBpp0310521	CE1	6.6e-07	30.1	0	1.2e-06	29.2	0	ID=FBpp0310521;	name=CG45002-PJ;	parent=FBgn0266354,FBtr0344096;
FBpp0310522	CE1	6.6e-07	30.1	0	1.2e-06	29.2	0	ID=FBpp0310522;	name=CG45002-PD;	parent=FBgn0266354,FBtr0344097;
FBpp0310526	CE1	6.6e-07	30.1	0	1.2e-06	29.2	0	ID=FBpp0310526;	name=CG45002-PH;	parent=FBgn0266354,FBtr0344101;
FBpp0310525	CE1	7.7e-07	29.9	0	1.4e-06	29	0	ID=FBpp0310525;	name=CG45002-PG;	parent=FBgn0266354,FBtr0344100;
FBpp0310523	CE1	7.9e-07	29.8	0	1.5e-06	28.9	0	ID=FBpp0310523;	name=CG45002-PE;	parent=FBgn0266354,FBtr0344098;
FBpp0076246	CE1	1.1e-06	29.4	0	2e-06	28.5	0	ID=FBpp0076246;	name=CG5068-PA;	parent=FBgn0035951,FBtr0076519;
FBpp0306036	CE1	1.1e-06	29.4	0	2e-06	28.5	0	ID=FBpp0306036;	name=CG5068-PB;	parent=FBgn0035951,FBtr0333907;
FBpp0083814	CE1	1.5e-06	28.9	0.1	2.2e-06	28.4	0.1	ID=FBpp0083814;	name=CG10175-PB;	parent=FBgn0039084,FBtr0084422;
FBpp0083813	CE1	2.1e-06	28.4	0.1	3.4e-06	27.7	0.1	ID=FBpp0083813;	name=CG10175-PA;	parent=FBgn0039084,FBtr0084421;
FBpp0311034	CE1	2.1e-06	28.4	0.1	3.4e-06	27.7	0.1	ID=FBpp0311034;	name=CG10175-PE;	parent=FBgn0039084,FBtr0344701;
FBpp0083815	CE1	2.2e-06	28.3	0.1	3.6e-06	27.7	0.1	ID=FBpp0083815;	name=CG10175-PC;	parent=FBgn0039084,FBtr0084423;
FBpp0308684	CE1	2.3e-06	28.3	0.1	4.2e-06	27.4	0.1	ID=FBpp0308684;	name=CG10175-PD;	parent=FBgn0039084,FBtr0339621;
FBpp0073975	CE3	1.6e-10	42	0	4e-10	40.7	0.1	ID=FBpp0073975;	name=Paf-AHalpha-PA;	parent=FBgn0025809,FBtr0074190;
FBpp0073976	CE3	1.6e-10	42	0	4e-10	40.7	0.1	ID=FBpp0073976;	name=Paf-AHalpha-PB;	parent=FBgn0025809,FBtr0074191;
FBpp0301166	CE4	1.6e-15	58.2	0.3	3.7e-15	57	0	ID=FBpp0301166;	name=Cda5-PH;	parent=FBgn0051973,FBtr0309227;
FBpp0077821	CE4	1.6e-15	58.1	0	4.6e-15	56.7	0	ID=FBpp0077821;	name=Cda5-PA;	parent=FBgn0051973,FBtr0078163;
FBpp0301164	CE4	2.9e-15	57.3	0	8e-15	55.9	0	ID=FBpp0301164;	name=Cda5-PF;	parent=FBgn0051973,FBtr0309225;
FBpp0301167	CE4	3.1e-15	57.2	0	9.9e-15	55.6	0	ID=FBpp0301167;	name=Cda5-PI;	parent=FBgn0051973,FBtr0309228;
FBpp0301165	CE4	3.2e-15	57.2	0	9.5e-15	55.7	0	ID=FBpp0301165;	name=Cda5-PG;	parent=FBgn0051973,FBtr0309226;
FBpp0301168	CE4	3.3e-15	57.2	0	1e-14	55.6	0	ID=FBpp0301168;	name=Cda5-PJ;	parent=FBgn0051973,FBtr0309229;
FBpp0077822	CE4	3.5e-15	57.1	0	1.1e-14	55.5	0	ID=FBpp0077822;	name=Cda5-PB;	parent=FBgn0051973,FBtr0078164;
FBpp0074721	CE4	1.4e-13	51.9	0.1	2.8e-13	50.9	0.1	ID=FBpp0074721;	name=serp-PB;	parent=FBgn0260653,FBtr0074953;
FBpp0305995	CE4	1.4e-13	51.9	0.1	2.8e-13	50.9	0.1	ID=FBpp0305995;	name=serp-PC;	parent=FBgn0260653,FBtr0333862;
FBpp0112328	CE4	4e-12	47.2	0	1.1e-11	45.7	0	ID=FBpp0112328;	name=Cda5-PE;	parent=FBgn0051973,FBtr0113416;
FBpp0086137	CE4	6.3e-11	43.3	0	1e-10	42.6	0	ID=FBpp0086137;	name=Cda9-PA;	parent=FBgn0034197,FBtr0086984;
FBpp0309120	CE4	6.3e-11	43.3	0	1e-10	42.6	0	ID=FBpp0309120;	name=Cda9-PB;	parent=FBgn0034197,FBtr0340127;
FBpp0080449	CE4	3.8e-10	40.8	0	9.5e-10	39.5	0	ID=FBpp0080449;	name=ChLD3-PA;	parent=FBgn0032598,FBtr0080892;
FBpp0291540	CE4	1.9e-07	32.1	0	4.5e-07	30.9	0	ID=FBpp0291540;	name=verm-PG;	parent=FBgn0261341,FBtr0302335;
FBpp0311365	CE4	1.9e-07	32	0	4.6e-07	30.8	0	ID=FBpp0311365;	name=verm-PH;	parent=FBgn0261341,FBtr0345144;
FBpp0311366	CE4	2.1e-07	31.9	0	5e-07	30.7	0	ID=FBpp0311366;	name=verm-PI;	parent=FBgn0261341,FBtr0345145;
FBpp0077054	CE4	2.1e-06	28.7	0	3.4e-06	28	0	ID=FBpp0077054;	name=Cda4-PA;	parent=FBgn0052499,FBtr0077362;
FBpp0077328	CE7	2.2e-11	44	0.7	0.00025	20.8	0.1	ID=FBpp0077328;	name=Bem46-PA;	parent=FBgn0025109,FBtr0077643;
FBpp0077032	CE9	2e-130	435.5	0	2.2e-130	435.3	0	ID=FBpp0077032;	name=CG17065-PA;	parent=FBgn0031099,FBtr0077340;
FBpp0311839	CE9	2e-130	435.5	0	2.2e-130	435.3	0	ID=FBpp0311839;	name=CG17065-PD;	parent=FBgn0031099,FBtr0345924;
FBpp0290783	CE9	4.6e-129	431	0	5.7e-129	430.7	0	ID=FBpp0290783;	name=CG17065-PB;	parent=FBgn0031099,FBtr0301568;
FBpp0088628	CE9	7.8e-13	48.5	0	2.2e-06	27.2	0	ID=FBpp0088628;	name=CRMP-PA;	parent=FBgn0023023,FBtr0089686;
FBpp0112945	CE9	8.2e-13	48.4	0	2.3e-06	27.2	0	ID=FBpp0112945;	name=CRMP-PE;	parent=FBgn0023023,FBtr0114453;
FBpp0074325	CE9	3.6e-08	33.1	0	2.9e-05	23.6	0	ID=FBpp0074325;	name=CG6106-PA;	parent=FBgn0030914,FBtr0074553;
FBpp0309961	CE9	3.6e-08	33.1	0	2.9e-05	23.6	0	ID=FBpp0309961;	name=CG6106-PB;	parent=FBgn0030914,FBtr0343296;
FBpp0088627	CE9	5.3e-07	29.3	0	7.9e-07	28.7	0	ID=FBpp0088627;	name=CRMP-PB;	parent=FBgn0023023,FBtr0089685;
FBpp0085217	GH106	1.3e-10	40.9	0.1	4.3e-10	39.2	0	ID=FBpp0085217;	name=betaGlu-PA;	parent=FBgn0270927,FBtr0085858;
FBpp0309399	GH106	2.1e-09	36.9	0	3.3e-09	36.2	0	ID=FBpp0309399;	name=CG15117-PD;	parent=FBgn0034417,FBtr0340457;
FBpp0309400	GH106	2.2e-09	36.8	0	3.5e-09	36.2	0	ID=FBpp0309400;	name=CG15117-PE;	parent=FBgn0034417,FBtr0340458;
FBpp0309401	GH106	2.2e-09	36.8	0	3.5e-09	36.2	0	ID=FBpp0309401;	name=CG15117-PF;	parent=FBgn0034417,FBtr0340459;
FBpp0099475	GH106	2.2e-09	36.8	0	3.5e-09	36.2	0	ID=FBpp0099475;	name=CG15117-PC;	parent=FBgn0034417,FBtr0100129;
FBpp0085777	GH106	2.2e-09	36.8	0	3.5e-09	36.2	0	ID=FBpp0085777;	name=CG15117-PA;	parent=FBgn0034417,FBtr0086593;
FBpp0085778	GH106	2.3e-09	36.8	0	3.6e-09	36.1	0	ID=FBpp0085778;	name=CG15117-PB;	parent=FBgn0034417,FBtr0086594;
FBpp0077468	GH109	1.6e-08	35.8	0	2.5e-08	35.1	0	ID=FBpp0077468;	name=CG3609-PA;	parent=FBgn0031418,FBtr0077791;
FBpp0292146	GH109	1.6e-08	35.8	0	2.5e-08	35.1	0	ID=FBpp0292146;	name=CG3609-PB;	parent=FBgn0031418,FBtr0303027;
FBpp0303858	GH109	1.6e-08	35.8	0	2.5e-08	35.1	0	ID=FBpp0303858;	name=CG3609-PC;	parent=FBgn0031418,FBtr0331441;
FBpp0077569	GH109	6.2e-07	30.6	0.1	1.6e-06	29.2	0.1	ID=FBpp0077569;	name=CG17712-PA;	parent=FBgn0027597,FBtr0077903;
FBpp0077469	GH109	2.4e-06	28.7	0	7.5e-06	27.1	0	ID=FBpp0077469;	name=CG3597-PA;	parent=FBgn0031417,FBtr0077792;
FBpp0303517	GH109	2.5e-06	28.7	0	7.6e-06	27.1	0	ID=FBpp0303517;	name=CG3597-PB;	parent=FBgn0031417,FBtr0330667;
FBpp0309400	GH113	2.4e-07	30.9	0.7	4.2e-07	30.1	0.7	ID=FBpp0309400;	name=CG15117-PE;	parent=FBgn0034417,FBtr0340458;
FBpp0309401	GH113	2.4e-07	30.9	0.7	4.2e-07	30.1	0.7	ID=FBpp0309401;	name=CG15117-PF;	parent=FBgn0034417,FBtr0340459;
FBpp0309399	GH113	2.6e-07	30.8	0.7	4.4e-07	30	0.7	ID=FBpp0309399;	name=CG15117-PD;	parent=FBgn0034417,FBtr0340457;
FBpp0085777	GH113	2.6e-07	30.7	0.7	4.5e-07	30	0.7	ID=FBpp0085777;	name=CG15117-PA;	parent=FBgn0034417,FBtr0086593;
FBpp0099475	GH113	2.6e-07	30.7	0.7	4.5e-07	30	0.7	ID=FBpp0099475;	name=CG15117-PC;	parent=FBgn0034417,FBtr0100129;
FBpp0085778	GH113	2.7e-07	30.7	0.7	4.7e-07	29.9	0.7	ID=FBpp0085778;	name=CG15117-PB;	parent=FBgn0034417,FBtr0086594;
FBpp0310264	GH116	2.9e-158	527.5	6.2	3.7e-158	527.1	6.2	ID=FBpp0310264;	name=CG33090-PC;	parent=FBgn0028916,FBtr0343673;
FBpp0310266	GH116	4.1e-158	527	6.2	5.4e-158	526.6	6.2	ID=FBpp0310266;	name=CG33090-PE;	parent=FBgn0028916,FBtr0343675;
FBpp0310265	GH116	4.3e-158	526.9	6.2	5.7e-158	526.5	6.2	ID=FBpp0310265;	name=CG33090-PD;	parent=FBgn0028916,FBtr0343674;
FBpp0080197	GH116	4.4e-158	526.9	6.2	5.7e-158	526.5	6.2	ID=FBpp0080197;	name=CG33090-PB;	parent=FBgn0028916,FBtr0080624;
FBpp0306552	GH119	1.6e-09	36.8	0	0.12	10.6	0	ID=FBpp0306552;	name=bt-PH;	parent=FBgn0005666,FBtr0334482;
FBpp0311242	GH119	1.9e-09	36.5	0	0.13	10.6	0	ID=FBpp0311242;	name=bt-PJ;	parent=FBgn0005666,FBtr0344988;
FBpp0088734	GH119	2e-09	36.4	0	0.13	10.6	0	ID=FBpp0088734;	name=bt-PC;	parent=FBgn0005666,FBtr0089793;
FBpp0306553	GH119	2.4e-09	36.2	0	0.13	10.5	0	ID=FBpp0306553;	name=bt-PI;	parent=FBgn0005666,FBtr0334483;
FBpp0290554	GH119	2.5e-09	36.1	0	0.13	10.5	0	ID=FBpp0290554;	name=bt-PF;	parent=FBgn0005666,FBtr0301340;
FBpp0081633	GH120	9e-06	26.9	29.6	0.032	15.5	2.5	ID=FBpp0081633;	name=FBXO11-PA;	parent=FBgn0037760,FBtr0082155;
FBpp0306742	GH120	9e-06	26.9	29.6	0.032	15.5	2.5	ID=FBpp0306742;	name=FBXO11-PB;	parent=FBgn0037760,FBtr0334684;
FBpp0271830	GH13	1.1e-68	233.4	10.5	2.3e-68	232.4	10.5	ID=FBpp0271830;	name=Mal-A6-PC;	parent=FBgn0050360,FBtr0273322;
FBpp0312227	GH13	1.1e-68	233.4	10.5	2.3e-68	232.4	10.5	ID=FBpp0312227;	name=Mal-A6-PD;	parent=FBgn0050360,FBtr0346647;
FBpp0308388	GH13	1.8e-68	232.8	6.9	3.3e-68	231.9	6.9	ID=FBpp0308388;	name=Mal-A5-PC;	parent=FBgn0050359,FBtr0339279;
FBpp0087828	GH13	2e-68	232.6	6.9	3.6e-68	231.8	6.9	ID=FBpp0087828;	name=Mal-A5-PA;	parent=FBgn0050359,FBtr0088749;
FBpp0079860	GH13	3e-68	232	12.6	7.7e-68	230.7	12.6	ID=FBpp0079860;	name=Mal-B2-PA;	parent=FBgn0032382,FBtr0080276;
FBpp0423050	GH13	3.4e-68	231.9	12.6	8.5e-68	230.5	12.6	ID=FBpp0423050;	name=Mal-B2-PE;	parent=FBgn0032382,FBtr0473587;
FBpp0423051	GH13	3.4e-68	231.9	12.6	8.5e-68	230.5	12.6	ID=FBpp0423051;	name=Mal-B2-PF;	parent=FBgn0032382,FBtr0473588;
FBpp0087826	GH13	4.3e-68	231.5	16.8	9.1e-68	230.5	16.8	ID=FBpp0087826;	name=Mal-A2-PA;	parent=FBgn0002569,FBtr0088747;
FBpp0079859	GH13	6.5e-67	227.6	10.1	1.2e-66	226.8	10.1	ID=FBpp0079859;	name=Mal-B1-PA;	parent=FBgn0032381,FBtr0080275;
FBpp0087836	GH13	2.1e-66	225.9	6.5	4e-66	225	6.5	ID=FBpp0087836;	name=Mal-A7-PA;	parent=FBgn0033296,FBtr0088757;
FBpp0311600	GH13	2.1e-66	225.9	6.5	4e-66	225	6.5	ID=FBpp0311600;	name=Mal-A7-PB;	parent=FBgn0033296,FBtr0345489;
FBpp0087831	GH13	6.4e-66	224.4	4.4	1.4e-65	223.3	4.4	ID=FBpp0087831;	name=Mal-A8-PA;	parent=FBgn0033297,FBtr0088752;
FBpp0087827	GH13	1.6e-65	223.1	17.1	3.5e-65	222	17.1	ID=FBpp0087827;	name=Mal-A4-PA;	parent=FBgn0033294,FBtr0088748;
FBpp0087837	GH13	4.6e-65	221.6	6	7.9e-65	220.8	6	ID=FBpp0087837;	name=Mal-A3-PA;	parent=FBgn0002571,FBtr0088758;
FBpp0087838	GH13	1.7e-63	216.4	16.2	1.7e-63	216.4	16.2	ID=FBpp0087838;	name=Mal-A1-PA;	parent=FBgn0002570,FBtr0088759;
FBpp0290175	GH13	1.5e-52	180.5	7.6	2.6e-52	179.7	7.6	ID=FBpp0290175;	name=Mal-A5-PB;	parent=FBgn0050359,FBtr0300953;
FBpp0086155	GH13	2.7e-30	107.4	0.6	4.6e-30	106.6	0.6	ID=FBpp0086155;	name=Amy-p-PA;	parent=FBgn0000079,FBtr0087004;
FBpp0311627	GH13	2.7e-30	107.4	0.6	4.6e-30	106.6	0.6	ID=FBpp0311627;	name=Amy-p-PB;	parent=FBgn0000079,FBtr0345521;
FBpp0086136	GH13	2.9e-30	107.3	0.6	4.6e-30	106.6	0.6	ID=FBpp0086136;	name=Amy-d-PA;	parent=FBgn0000078,FBtr0086983;
FBpp0086263	GH13	4.3e-29	103.5	0.9	8.1e-29	102.6	0.9	ID=FBpp0086263;	name=Amyrel-PA;	parent=FBgn0020506,FBtr0087117;
FBpp0086845	GH13	2.5e-20	74.7	7.6	2.5e-20	74.7	7.6	ID=FBpp0086845;	name=AGBE-PA;	parent=FBgn0053138,FBtr0087732;
FBpp0071525	GH13	6.4e-06	27.4	0	0.0063	17.6	0	ID=FBpp0071525;	name=CG9485-PA;	parent=FBgn0034618,FBtr0071599;
FBpp0289624	GH13	6.4e-06	27.4	0	0.0063	17.6	0	ID=FBpp0289624;	name=CG9485-PE;	parent=FBgn0034618,FBtr0300395;
FBpp0302010	GH13	6.4e-06	27.4	0	0.0063	17.6	0	ID=FBpp0302010;	name=CG9485-PF;	parent=FBgn0034618,FBtr0310327;
FBpp0071527	GH13	6.5e-06	27.4	0	0.0063	17.6	0	ID=FBpp0071527;	name=CG9485-PC;	parent=FBgn0034618,FBtr0071601;
FBpp0289623	GH13	6.7e-06	27.3	0	0.0073	17.4	0	ID=FBpp0289623;	name=CG9485-PD;	parent=FBgn0034618,FBtr0300394;
FBpp0071526	GH13	7.6e-06	27.1	0	0.0056	17.7	0	ID=FBpp0071526;	name=CG9485-PB;	parent=FBgn0034618,FBtr0071600;
FBpp0081314	GH13	7.8e-06	27.1	0	1.4e-05	26.3	0	ID=FBpp0081314;	name=CD98hc-PA;	parent=FBgn0037533,FBtr0081824;
FBpp0303760	GH13	7.8e-06	27.1	0	1.4e-05	26.3	0	ID=FBpp0303760;	name=CD98hc-PB;	parent=FBgn0037533,FBtr0331342;
FBpp0303762	GH13	7.8e-06	27.1	0	1.4e-05	26.3	0	ID=FBpp0303762;	name=CD98hc-PD;	parent=FBgn0037533,FBtr0331344;
FBpp0428086	GH13	9.7e-06	26.8	0	1.8e-05	25.9	0	ID=FBpp0428086;	name=CD98hc-PG;	parent=FBgn0037533,FBtr0479743;
FBpp0301190	GH15	1.8e-10	41.4	0	3.3e-10	40.5	0	ID=FBpp0301190;	name=CG7766-PH;	parent=FBgn0030087,FBtr0309251;
FBpp0309977	GH15	1.8e-10	41.4	0	2.7e-10	40.8	0	ID=FBpp0309977;	name=CG7766-PI;	parent=FBgn0030087,FBtr0343319;
FBpp0113087	GH15	1.9e-10	41.3	0	2.8e-10	40.7	0	ID=FBpp0113087;	name=CG7766-PD;	parent=FBgn0030087,FBtr0114595;
FBpp0071287	GH15	1.9e-10	41.3	0	2.8e-10	40.7	0	ID=FBpp0071287;	name=CG7766-PB;	parent=FBgn0030087,FBtr0071352;
FBpp0071286	GH15	1.9e-10	41.3	0	2.8e-10	40.7	0	ID=FBpp0071286;	name=CG7766-PA;	parent=FBgn0030087,FBtr0071351;
FBpp0113086	GH15	2e-10	41.2	0	3.1e-10	40.6	0	ID=FBpp0113086;	name=CG7766-PC;	parent=FBgn0030087,FBtr0114594;
FBpp0301189	GH15	2e-10	41.2	0	3.2e-10	40.5	0	ID=FBpp0301189;	name=CG7766-PG;	parent=FBgn0030087,FBtr0309250;
FBpp0079255	GH15	1e-08	35.6	0	1.8e-08	34.8	0	ID=FBpp0079255;	name=CG8475-PB;	parent=FBgn0031995,FBtr0079639;
FBpp0079254	GH15	5.5e-08	33.2	0	9.2e-08	32.4	0	ID=FBpp0079254;	name=CG8475-PA;	parent=FBgn0031995,FBtr0079638;
FBpp0307178	GH15	5.6e-08	33.1	0	9.3e-08	32.4	0	ID=FBpp0307178;	name=CG8475-PC;	parent=FBgn0031995,FBtr0335186;
FBpp0076237	GH16	3.5e-33	116.5	0.4	5.1e-33	116	0.4	ID=FBpp0076237;	name=GNBP3-PA;	parent=FBgn0040321,FBtr0076510;
FBpp0074863	GH16	2.7e-25	90.8	0.3	4.1e-25	90.2	0.3	ID=FBpp0074863;	name=GNBP2-PD;	parent=FBgn0040322,FBtr0075096;
FBpp0074862	GH16	3.1e-25	90.6	0.3	4.9e-25	89.9	0.3	ID=FBpp0074862;	name=GNBP2-PA;	parent=FBgn0040322,FBtr0075095;
FBpp0074861	GH16	3.8e-25	90.3	0.3	5.9e-25	89.7	0.3	ID=FBpp0074861;	name=GNBP2-PB;	parent=FBgn0040322,FBtr0075094;
FBpp0074817	GH16	2.6e-22	81	0	5.7e-22	79.9	0	ID=FBpp0074817;	name=GNBP1-PA;	parent=FBgn0040323,FBtr0075050;
FBpp0110419	GH18	8.9e-280	926	24.3	9.5e-74	249.6	1.1	ID=FBpp0110419;	name=Cht10-PA;	parent=FBgn0250907,FBtr0111127;
FBpp0303592	GH18	8.9e-280	926	24.3	9.5e-74	249.6	1.1	ID=FBpp0303592;	name=Cht10-PB;	parent=FBgn0250907,FBtr0331165;
FBpp0303593	GH18	8.9e-280	926	24.3	9.5e-74	249.6	1.1	ID=FBpp0303593;	name=Cht10-PC;	parent=FBgn0250907,FBtr0331166;
FBpp0072985	GH18	3.6e-166	553	4.4	1.7e-84	284.9	0.4	ID=FBpp0072985;	name=Cht7-PA;	parent=FBgn0035398,FBtr0073124;
FBpp0071463	GH18	1.3e-82	278.7	0	1.7e-82	278.3	0	ID=FBpp0071463;	name=Cht8-PA;	parent=FBgn0034580,FBtr0071534;
FBpp0298360	GH18	2.7e-81	274.4	2.8	7.5e-81	272.9	2.8	ID=FBpp0298360;	name=Cht6-PG;	parent=FBgn0263132,FBtr0307371;
FBpp0298359	GH18	3e-81	274.2	2.8	5.8e-81	273.3	2.8	ID=FBpp0298359;	name=Cht6-PF;	parent=FBgn0263132,FBtr0307370;
FBpp0298361	GH18	6e-81	273.2	2.8	1.3e-80	272.1	2.8	ID=FBpp0298361;	name=Cht6-PH;	parent=FBgn0263132,FBtr0307372;
FBpp0298362	GH18	1.6e-80	271.8	2.8	1.6e-80	271.8	2.8	ID=FBpp0298362;	name=Cht6-PI;	parent=FBgn0263132,FBtr0307373;
FBpp0298364	GH18	2.6e-80	271.1	2.8	2.6e-80	271.1	2.8	ID=FBpp0298364;	name=Cht6-PK;	parent=FBgn0263132,FBtr0307375;
FBpp0298363	GH18	3.4e-80	270.8	2.8	3.4e-80	270.8	2.8	ID=FBpp0298363;	name=Cht6-PJ;	parent=FBgn0263132,FBtr0307374;
FBpp0298358	GH18	3.5e-80	270.7	2.8	3.5e-80	270.7	2.8	ID=FBpp0298358;	name=Cht6-PC;	parent=FBgn0263132,FBtr0307369;
FBpp0072677	GH18	1.1e-76	259.2	0.3	1.4e-76	258.9	0.3	ID=FBpp0072677;	name=Cht2-PA;	parent=FBgn0022702,FBtr0072795;
FBpp0297108	GH18	1.1e-76	259.2	0.3	1.4e-76	258.9	0.3	ID=FBpp0297108;	name=Cht2-PB;	parent=FBgn0022702,FBtr0305966;
FBpp0306200	GH18	1.1e-76	259.2	0.3	1.4e-76	258.9	0.3	ID=FBpp0306200;	name=Cht2-PC;	parent=FBgn0022702,FBtr0334075;
FBpp0071472	GH18	5.5e-76	256.9	0.7	7e-76	256.6	0.7	ID=FBpp0071472;	name=Cht4-PA;	parent=FBgn0022700,FBtr0071543;
FBpp0082294	GH18	3.1e-74	251.2	4.6	4.1e-74	250.8	4.6	ID=FBpp0082294;	name=Cht5-PA;	parent=FBgn0038180,FBtr0082826;
FBpp0071471	GH18	9.5e-74	249.6	10.5	1.2e-73	249.3	10.5	ID=FBpp0071471;	name=Cht9-PA;	parent=FBgn0034582,FBtr0071542;
FBpp0071000	GH18	1.7e-60	206.1	0	2e-60	205.9	0	ID=FBpp0071000;	name=Cht11-PA;	parent=FBgn0029913,FBtr0071041;
FBpp0086257	GH18	6.9e-55	187.7	0.1	8.7e-55	187.3	0.1	ID=FBpp0086257;	name=Idgf6-PA;	parent=FBgn0013763,FBtr0087111;
FBpp0309072	GH18	6.9e-55	187.7	0.1	8.7e-55	187.3	0.1	ID=FBpp0309072;	name=Idgf6-PB;	parent=FBgn0013763,FBtr0340066;
FBpp0071328	GH18	3.5e-54	185.4	0	4.6e-54	185	0	ID=FBpp0071328;	name=Idgf4-PA;	parent=FBgn0026415,FBtr0071393;
FBpp0071329	GH18	3.5e-54	185.4	0	4.6e-54	185	0	ID=FBpp0071329;	name=Idgf4-PB;	parent=FBgn0026415,FBtr0071394;
FBpp0309782	GH18	3.5e-54	185.4	0	4.6e-54	185	0	ID=FBpp0309782;	name=Idgf4-PC;	parent=FBgn0026415,FBtr0343030;
FBpp0080419	GH18	6.6e-54	184.5	0	1e-53	183.8	0	ID=FBpp0080419;	name=Idgf3-PC;	parent=FBgn0020414,FBtr0080862;
FBpp0080420	GH18	6.6e-54	184.5	0	1e-53	183.8	0	ID=FBpp0080420;	name=Idgf3-PB;	parent=FBgn0020414,FBtr0080863;
FBpp0080421	GH18	6.6e-54	184.5	0	1e-53	183.8	0	ID=FBpp0080421;	name=Idgf3-PA;	parent=FBgn0020414,FBtr0080864;
FBpp0309719	GH18	6.6e-54	184.5	0	1e-53	183.8	0	ID=FBpp0309719;	name=Idgf3-PD;	parent=FBgn0020414,FBtr0342945;
FBpp0080418	GH18	8.8e-54	184.1	0	1.1e-53	183.7	0	ID=FBpp0080418;	name=Idgf2-PA;	parent=FBgn0020415,FBtr0080861;
FBpp0071473	GH18	8.6e-52	177.5	0	1.1e-51	177.1	0	ID=FBpp0071473;	name=Cht12-PA;	parent=FBgn0050293,FBtr0071544;
FBpp0297126	GH18	4.3e-48	165.4	0	5.2e-48	165.1	0	ID=FBpp0297126;	name=Idgf2-PB;	parent=FBgn0020415,FBtr0305984;
FBpp0300423	GH18	4.3e-48	165.4	0	5.2e-48	165.1	0	ID=FBpp0300423;	name=Idgf2-PC;	parent=FBgn0020415,FBtr0308080;
FBpp0080417	GH18	3.5e-47	162.4	0	4.4e-47	162.1	0	ID=FBpp0080417;	name=Idgf1-PA;	parent=FBgn0020416,FBtr0080860;
FBpp0085849	GH18	5.2e-43	148.7	0	6.5e-43	148.4	0	ID=FBpp0085849;	name=Idgf5-PA;	parent=FBgn0064237,FBtr0086668;
FBpp0079207	GH18	2.5e-27	97.2	0	3.4e-27	96.8	0	ID=FBpp0079207;	name=CG8460-PA;	parent=FBgn0031996,FBtr0079586;
FBpp0075080	GH1	3e-153	511.4	0.9	3.6e-153	511.1	0.9	ID=FBpp0075080;	name=CG9701-PA;	parent=FBgn0036659,FBtr0075321;
FBpp0073093	GH20	5.3e-90	303	0.6	7.1e-90	302.6	0.6	ID=FBpp0073093;	name=Hexo1-PD;	parent=FBgn0041630,FBtr0073237;
FBpp0289998	GH20	5.3e-90	303	0.6	7.1e-90	302.6	0.6	ID=FBpp0289998;	name=Hexo1-PE;	parent=FBgn0041630,FBtr0300774;
FBpp0305744	GH20	5.3e-90	303	0.6	7.1e-90	302.6	0.6	ID=FBpp0305744;	name=Hexo1-PF;	parent=FBgn0041630,FBtr0333567;
FBpp0073091	GH20	5.7e-90	302.9	0.6	7.7e-90	302.4	0.6	ID=FBpp0073091;	name=Hexo1-PA;	parent=FBgn0041630,FBtr0073235;
FBpp0087057	GH20	3.2e-84	284	1	4.5e-84	283.5	1	ID=FBpp0087057;	name=fdl-PC;	parent=FBgn0045063,FBtr0087946;
FBpp0312213	GH20	3.2e-84	284	1	4.5e-84	283.5	1	ID=FBpp0312213;	name=fdl-PF;	parent=FBgn0045063,FBtr0346633;
FBpp0423147	GH20	3.2e-84	284	1	4.6e-84	283.5	1	ID=FBpp0423147;	name=fdl-PG;	parent=FBgn0045063,FBtr0474148;
FBpp0308699	GH20	3.3e-84	283.9	1	4.7e-84	283.4	1	ID=FBpp0308699;	name=fdl-PE;	parent=FBgn0045063,FBtr0339637;
FBpp0087058	GH20	3.3e-84	283.9	1	4.8e-84	283.4	1	ID=FBpp0087058;	name=fdl-PB;	parent=FBgn0045063,FBtr0087947;
FBpp0071192	GH20	3.8e-76	257.4	0.1	5.5e-76	256.9	0.1	ID=FBpp0071192;	name=Hexo2-PA;	parent=FBgn0041629,FBtr0071249;
FBpp0082981	GH20	4.7e-26	92.7	0	8.4e-26	91.9	0	ID=FBpp0082981;	name=CG7985-PA;	parent=FBgn0028499,FBtr0083559;
FBpp0307572	GH20	4.7e-26	92.7	0	8.4e-26	91.9	0	ID=FBpp0307572;	name=CG7985-PB;	parent=FBgn0028499,FBtr0336469;
FBpp0297621	GH22	1.3e-161	529.7	24.7	3.5e-43	147.3	3.4	ID=FBpp0297621;	name=CG8492-PD;	parent=FBgn0035813,FBtr0306682;
FBpp0072529	GH22	2.3e-42	144.7	3.5	2.6e-42	144.5	3.5	ID=FBpp0072529;	name=LysP-PA;	parent=FBgn0004429,FBtr0072633;
FBpp0072530	GH22	6.7e-42	143.2	1.3	7.6e-42	143	1.3	ID=FBpp0072530;	name=LysD-PA;	parent=FBgn0004427,FBtr0072634;
FBpp0072524	GH22	6.8e-42	143.1	1.3	7.6e-42	143	1.3	ID=FBpp0072524;	name=LysB-PA;	parent=FBgn0004425,FBtr0072628;
FBpp0307718	GH22	6.8e-42	143.1	1.3	7.6e-42	143	1.3	ID=FBpp0307718;	name=LysB-PB;	parent=FBgn0004425,FBtr0336738;
FBpp0072526	GH22	9.1e-42	142.7	1	1e-41	142.6	1	ID=FBpp0072526;	name=LysE-PA;	parent=FBgn0004428,FBtr0072630;
FBpp0072527	GH22	5.1e-41	140.3	3.7	5.7e-41	140.2	3.7	ID=FBpp0072527;	name=LysS-PA;	parent=FBgn0004430,FBtr0072631;
FBpp0085560	GH22	1e-40	139.3	1.5	1.2e-40	139.1	1.5	ID=FBpp0085560;	name=CG11159-PA;	parent=FBgn0034539,FBtr0086248;
FBpp0086336	GH22	1.1e-40	139.2	0.6	1.3e-40	139	0.6	ID=FBpp0086336;	name=CG7798-PA;	parent=FBgn0034092,FBtr0087192;
FBpp0072533	GH22	1.2e-40	139.1	0.9	1.3e-40	139	0.9	ID=FBpp0072533;	name=LysX-PA;	parent=FBgn0004431,FBtr0072637;
FBpp0292257	GH22	4.5e-39	134	0.4	5.8e-39	133.7	0.4	ID=FBpp0292257;	name=CG30062-PB;	parent=FBgn0050062,FBtr0303158;
FBpp0085561	GH22	3.9e-38	131	6.1	4.7e-38	130.7	6.1	ID=FBpp0085561;	name=CG16799-PA;	parent=FBgn0034538,FBtr0086249;
FBpp0309593	GH22	3.9e-38	131	6.1	4.7e-38	130.7	6.1	ID=FBpp0309593;	name=CG16799-PB;	parent=FBgn0034538,FBtr0342721;
FBpp0070742	GH22	1.2e-35	122.9	1	1.5e-35	122.7	1	ID=FBpp0070742;	name=CG16756-PA;	parent=FBgn0029765,FBtr0070776;
FBpp0079549	GH27	1.3e-56	193.4	0.4	2.2e-27	97.3	0	ID=FBpp0079549;	name=CG5731-PA;	parent=FBgn0032192,FBtr0079959;
FBpp0086315	GH27	7.9e-54	184.3	0.3	1.9e-25	90.9	0	ID=FBpp0086315;	name=CG7997-PB;	parent=FBgn0034117,FBtr0087171;
FBpp0086316	GH27	7.9e-54	184.3	0.3	1.9e-25	90.9	0	ID=FBpp0086316;	name=CG7997-PA;	parent=FBgn0034117,FBtr0087172;
FBpp0100046	GH29	1.3e-97	327.8	5.7	1.7e-97	327.4	5.7	ID=FBpp0100046;	name=Fuca-PB;	parent=FBgn0285958,FBtr0100588;
FBpp0312400	GH29	1.3e-97	327.8	5.7	1.7e-97	327.4	5.7	ID=FBpp0312400;	name=Fuca-PC;	parent=FBgn0285958,FBtr0346860;
FBpp0099475	GH2	8.1e-110	369.3	7.1	1.1e-109	368.8	7.1	ID=FBpp0099475;	name=CG15117-PC;	parent=FBgn0034417,FBtr0100129;
FBpp0085777	GH2	8.1e-110	369.3	7.1	1.1e-109	368.8	7.1	ID=FBpp0085777;	name=CG15117-PA;	parent=FBgn0034417,FBtr0086593;
FBpp0085778	GH2	8.7e-110	369.2	7.1	1.2e-109	368.7	7.1	ID=FBpp0085778;	name=CG15117-PB;	parent=FBgn0034417,FBtr0086594;
FBpp0309399	GH2	9.3e-110	369.1	7.3	1.3e-109	368.6	7.3	ID=FBpp0309399;	name=CG15117-PD;	parent=FBgn0034417,FBtr0340457;
FBpp0309400	GH2	2.7e-109	367.6	7.6	3.7e-109	367.1	7.6	ID=FBpp0309400;	name=CG15117-PE;	parent=FBgn0034417,FBtr0340458;
FBpp0309401	GH2	2.7e-109	367.6	7.6	3.7e-109	367.1	7.6	ID=FBpp0309401;	name=CG15117-PF;	parent=FBgn0034417,FBtr0340459;
FBpp0085217	GH2	1.3e-96	325.6	3.9	1.8e-96	325.2	3.9	ID=FBpp0085217;	name=betaGlu-PA;	parent=FBgn0270927,FBtr0085858;
FBpp0307685	GH2	1.7e-82	278.9	5.1	2.2e-82	278.6	5.1	ID=FBpp0307685;	name=beta-Man-PH;	parent=FBgn0037215,FBtr0336704;
FBpp0078603	GH2	1.8e-82	278.8	5.2	2.2e-82	278.5	5.2	ID=FBpp0078603;	name=beta-Man-PA;	parent=FBgn0037215,FBtr0078964;
FBpp0297164	GH2	1.8e-82	278.8	5.2	2.2e-82	278.5	5.2	ID=FBpp0297164;	name=beta-Man-PD;	parent=FBgn0037215,FBtr0306022;
FBpp0307683	GH2	4.1e-71	241.3	3.2	4.9e-71	241	3.2	ID=FBpp0307683;	name=beta-Man-PF;	parent=FBgn0037215,FBtr0336702;
FBpp0307684	GH2	4.1e-71	241.3	3.2	4.9e-71	241	3.2	ID=FBpp0307684;	name=beta-Man-PG;	parent=FBgn0037215,FBtr0336703;
FBpp0112317	GH30	6.7e-102	342.4	0	8.4e-102	342.1	0	ID=FBpp0112317;	name=Gba1b-PB;	parent=FBgn0051414,FBtr0113405;
FBpp0306807	GH30	6.7e-102	342.4	0	8.4e-102	342.1	0	ID=FBpp0306807;	name=Gba1b-PC;	parent=FBgn0051414,FBtr0334767;
FBpp0083833	GH30	2.9e-100	337	0	3.7e-100	336.7	0	ID=FBpp0083833;	name=Gba1a-PA;	parent=FBgn0051148,FBtr0084441;
FBpp0070057	GH31	2.2e-140	469.2	10.2	2.2e-140	469.2	10.2	ID=FBpp0070057;	name=GCS2alpha-PB;	parent=FBgn0027588,FBtr0070058;
FBpp0070058	GH31	2.2e-140	469.2	10.2	2.2e-140	469.2	10.2	ID=FBpp0070058;	name=GCS2alpha-PC;	parent=FBgn0027588,FBtr0070059;
FBpp0070059	GH31	2.2e-140	469.2	10.2	2.2e-140	469.2	10.2	ID=FBpp0070059;	name=GCS2alpha-PA;	parent=FBgn0027588,FBtr0070060;
FBpp0070060	GH31	2.2e-140	469.2	10.2	2.2e-140	469.2	10.2	ID=FBpp0070060;	name=GCS2alpha-PE;	parent=FBgn0027588,FBtr0070061;
FBpp0070061	GH31	2.2e-140	469.2	10.2	2.2e-140	469.2	10.2	ID=FBpp0070061;	name=GCS2alpha-PD;	parent=FBgn0027588,FBtr0070062;
FBpp0084221	GH31	7e-86	289.6	5.4	9.2e-86	289.2	5.4	ID=FBpp0084221;	name=tobi-PA;	parent=FBgn0261575,FBtr0084847;
FBpp0070810	GH31	1.5e-57	196.3	0	5.1e-57	194.5	0	ID=FBpp0070810;	name=CG33080-PB;	parent=FBgn0053080,FBtr0070845;
FBpp0309737	GH31	1.5e-57	196.3	0	5.1e-57	194.5	0	ID=FBpp0309737;	name=CG33080-PD;	parent=FBgn0053080,FBtr0342972;
FBpp0309736	GH31	2.3e-57	195.7	0	7.5e-57	194	0	ID=FBpp0309736;	name=CG33080-PC;	parent=FBgn0053080,FBtr0342971;
FBpp0070809	GH31	3e-57	195.3	0	9.3e-57	193.7	0	ID=FBpp0070809;	name=CG33080-PA;	parent=FBgn0053080,FBtr0070844;
FBpp0304852	GH35	8.2e-107	358.1	0.6	1e-106	357.8	0.6	ID=FBpp0304852;	name=Gal-PB;	parent=FBgn0001089,FBtr0332603;
FBpp0078861	GH35	8.3e-107	358.1	0.6	1e-106	357.8	0.6	ID=FBpp0078861;	name=Gal-PA;	parent=FBgn0001089,FBtr0079230;
FBpp0081961	GH35	8.9e-105	351.4	0.3	1.2e-104	351	0.3	ID=FBpp0081961;	name=Ect3-PA;	parent=FBgn0260746,FBtr0082487;
FBpp0086315	GH36	5.2e-14	52.5	0.1	1.8e-12	47.4	0	ID=FBpp0086315;	name=CG7997-PB;	parent=FBgn0034117,FBtr0087171;
FBpp0086316	GH36	5.2e-14	52.5	0.1	1.8e-12	47.4	0	ID=FBpp0086316;	name=CG7997-PA;	parent=FBgn0034117,FBtr0087172;
FBpp0084221	GH36	1.8e-13	50.8	2	2.6e-13	50.2	2	ID=FBpp0084221;	name=tobi-PA;	parent=FBgn0261575,FBtr0084847;
FBpp0079549	GH36	1.2e-11	44.8	0.2	1.6e-10	41	0	ID=FBpp0079549;	name=CG5731-PA;	parent=FBgn0032192,FBtr0079959;
FBpp0070810	GH36	1.6e-07	31.1	0	2.3e-07	30.6	0	ID=FBpp0070810;	name=CG33080-PB;	parent=FBgn0053080,FBtr0070845;
FBpp0309737	GH36	1.6e-07	31.1	0	2.3e-07	30.6	0	ID=FBpp0309737;	name=CG33080-PD;	parent=FBgn0053080,FBtr0342972;
FBpp0309736	GH36	1.9e-07	30.8	0	2.8e-07	30.3	0	ID=FBpp0309736;	name=CG33080-PC;	parent=FBgn0053080,FBtr0342971;
FBpp0070809	GH36	2.2e-07	30.6	0	3.3e-07	30.1	0	ID=FBpp0070809;	name=CG33080-PA;	parent=FBgn0053080,FBtr0070844;
FBpp0071464	GH37	6.5e-174	580.3	3.6	7.3e-174	580.1	3.6	ID=FBpp0071464;	name=Treh-PE;	parent=FBgn0003748,FBtr0071535;
FBpp0071465	GH37	6.5e-174	580.3	3.6	7.3e-174	580.1	3.6	ID=FBpp0071465;	name=Treh-PD;	parent=FBgn0003748,FBtr0071536;
FBpp0071466	GH37	6.5e-174	580.3	3.6	7.3e-174	580.1	3.6	ID=FBpp0071466;	name=Treh-PA;	parent=FBgn0003748,FBtr0071537;
FBpp0304696	GH37	6.5e-174	580.3	3.6	7.3e-174	580.1	3.6	ID=FBpp0304696;	name=Treh-PG;	parent=FBgn0003748,FBtr0332423;
FBpp0071468	GH37	8e-174	579.9	3.6	9.2e-174	579.7	3.6	ID=FBpp0071468;	name=Treh-PC;	parent=FBgn0003748,FBtr0071539;
FBpp0071469	GH37	8e-174	579.9	3.6	9.2e-174	579.7	3.6	ID=FBpp0071469;	name=Treh-PF;	parent=FBgn0003748,FBtr0071540;
FBpp0071467	GH37	3.2e-168	561.5	3.7	3.6e-168	561.3	3.7	ID=FBpp0071467;	name=Treh-PB;	parent=FBgn0003748,FBtr0071538;
FBpp0086296	GH37	2.4e-146	489.3	4	1.4e-145	486.8	0	ID=FBpp0086296;	name=CG6262-PA;	parent=FBgn0034121,FBtr0087152;
FBpp0086295	GH37	5.5e-105	352.9	6.6	7.7e-105	352.4	0.1	ID=FBpp0086295;	name=CG6262-PB;	parent=FBgn0034121,FBtr0087151;
FBpp0079343	GH38	5.4e-76	256.5	2.9	8.5e-76	255.8	2.9	ID=FBpp0079343;	name=LManVI-PA;	parent=FBgn0032069,FBtr0079741;
FBpp0079621	GH38	5.7e-76	256.4	2.1	1e-75	255.6	2.1	ID=FBpp0079621;	name=LManII-PB;	parent=FBgn0027611,FBtr0080031;
FBpp0079632	GH38	6.3e-76	256.2	5.1	9.6e-76	255.6	5.1	ID=FBpp0079632;	name=LManI-PA;	parent=FBgn0032253,FBtr0080042;
FBpp0302811	GH38	6.3e-76	256.2	5.1	9.6e-76	255.6	5.1	ID=FBpp0302811;	name=LManI-PB;	parent=FBgn0032253,FBtr0321259;
FBpp0079620	GH38	2e-75	254.6	1.9	3.7e-75	253.7	1.9	ID=FBpp0079620;	name=LManII-PA;	parent=FBgn0027611,FBtr0080030;
FBpp0081509	GH38	7.2e-74	249.5	7.3	1.1e-73	248.9	7.3	ID=FBpp0081509;	name=alpha-Man-IIa-PA;	parent=FBgn0011740,FBtr0082031;
FBpp0306417	GH38	7.2e-74	249.5	7.3	1.1e-73	248.9	7.3	ID=FBpp0306417;	name=alpha-Man-IIa-PB;	parent=FBgn0011740,FBtr0334302;
FBpp0079344	GH38	2.2e-72	244.6	3.3	3.2e-72	244.1	3.3	ID=FBpp0079344;	name=LManV-PA;	parent=FBgn0032068,FBtr0079742;
FBpp0311773	GH38	2.2e-72	244.6	3.3	3.2e-72	244.1	3.3	ID=FBpp0311773;	name=LManV-PB;	parent=FBgn0032068,FBtr0345752;
FBpp0292117	GH38	1e-71	242.5	4.9	1.4e-71	242	4.9	ID=FBpp0292117;	name=LManIV-PB;	parent=FBgn0032067,FBtr0302992;
FBpp0079346	GH38	6.3e-70	236.6	4.1	1.1e-69	235.8	4.1	ID=FBpp0079346;	name=LManIII-PA;	parent=FBgn0032066,FBtr0079744;
FBpp0309205	GH38	6.3e-70	236.6	4.1	1.1e-69	235.8	4.1	ID=FBpp0309205;	name=LManIII-PB;	parent=FBgn0032066,FBtr0340230;
FBpp0082633	GH38	7e-68	229.8	3.2	1.1e-67	229.2	3.2	ID=FBpp0082633;	name=alpha-Man-IIb-PA;	parent=FBgn0026616,FBtr0083179;
FBpp0306660	GH38	7e-68	229.8	3.2	1.1e-67	229.2	3.2	ID=FBpp0306660;	name=alpha-Man-IIb-PB;	parent=FBgn0026616,FBtr0334593;
FBpp0311424	GH38	7e-68	229.8	3.2	1.1e-67	229.2	3.2	ID=FBpp0311424;	name=alpha-Man-IIb-PC;	parent=FBgn0026616,FBtr0345238;
FBpp0079816	GH39	1.9e-48	166.2	0.1	2.7e-48	165.8	0.1	ID=FBpp0079816;	name=CG6201-PA;	parent=FBgn0032343,FBtr0080229;
FBpp0304852	GH42	2.6e-08	34.3	0	4.7e-07	30.1	0	ID=FBpp0304852;	name=Gal-PB;	parent=FBgn0001089,FBtr0332603;
FBpp0078861	GH42	2.6e-08	34.2	0.1	4.8e-07	30.1	0.1	ID=FBpp0078861;	name=Gal-PA;	parent=FBgn0001089,FBtr0079230;
FBpp0081961	GH42	9.3e-08	32.4	0.1	9.7e-07	29.1	0.1	ID=FBpp0081961;	name=Ect3-PA;	parent=FBgn0260746,FBtr0082487;
FBpp0084785	GH47	7.1e-153	510.6	0.7	8.5e-153	510.3	0.7	ID=FBpp0084785;	name=alpha-Man-Ib-PA;	parent=FBgn0039634,FBtr0085416;
FBpp0289739	GH47	4.7e-150	501.3	0.1	5.7e-150	501	0.1	ID=FBpp0289739;	name=alpha-Man-Ia-PK;	parent=FBgn0259170,FBtr0300512;
FBpp0304147	GH47	4.7e-150	501.3	0.1	5.7e-150	501	0.1	ID=FBpp0304147;	name=alpha-Man-Ia-PP;	parent=FBgn0259170,FBtr0331759;
FBpp0288908	GH47	4.9e-150	501.2	0.1	6.9e-150	500.7	0.1	ID=FBpp0288908;	name=alpha-Man-Ia-PI;	parent=FBgn0259170,FBtr0299633;
FBpp0288907	GH47	5.4e-150	501.1	0.1	6.4e-150	500.8	0.1	ID=FBpp0288907;	name=alpha-Man-Ia-PH;	parent=FBgn0259170,FBtr0299632;
FBpp0289738	GH47	5.4e-150	501.1	0.1	6.4e-150	500.8	0.1	ID=FBpp0289738;	name=alpha-Man-Ia-PJ;	parent=FBgn0259170,FBtr0300511;
FBpp0289740	GH47	5.4e-150	501.1	0.1	6.4e-150	500.8	0.1	ID=FBpp0289740;	name=alpha-Man-Ia-PL;	parent=FBgn0259170,FBtr0300513;
FBpp0289741	GH47	5.4e-150	501.1	0.1	6.4e-150	500.8	0.1	ID=FBpp0289741;	name=alpha-Man-Ia-PM;	parent=FBgn0259170,FBtr0300514;
FBpp0289742	GH47	5.4e-150	501.1	0.1	6.4e-150	500.8	0.1	ID=FBpp0289742;	name=alpha-Man-Ia-PN;	parent=FBgn0259170,FBtr0300515;
FBpp0289743	GH47	5.4e-150	501.1	0.1	6.4e-150	500.8	0.1	ID=FBpp0289743;	name=alpha-Man-Ia-PO;	parent=FBgn0259170,FBtr0300516;
FBpp0080019	GH47	5.1e-139	464.9	0.1	7.2e-139	464.4	0.1	ID=FBpp0080019;	name=Edem2-PA;	parent=FBgn0032480,FBtr0080438;
FBpp0305437	GH47	5.2e-139	464.9	0.1	7e-139	464.4	0.1	ID=FBpp0305437;	name=Edem2-PB;	parent=FBgn0032480,FBtr0333235;
FBpp0070337	GH47	5.1e-136	455	0	9.2e-136	454.2	0	ID=FBpp0070337;	name=Edem1-PC;	parent=FBgn0023511,FBtr0070352;
FBpp0070338	GH47	5.1e-136	455	0	9.2e-136	454.2	0	ID=FBpp0070338;	name=Edem1-PB;	parent=FBgn0023511,FBtr0070353;
FBpp0070339	GH47	5.1e-136	455	0	9.2e-136	454.2	0	ID=FBpp0070339;	name=Edem1-PA;	parent=FBgn0023511,FBtr0070354;
FBpp0294034	GH47	5.1e-136	455	0	9.2e-136	454.2	0	ID=FBpp0294034;	name=Edem1-PD;	parent=FBgn0023511,FBtr0305583;
FBpp0304832	GH47	5.4e-136	454.9	0	9.7e-136	454.1	0	ID=FBpp0304832;	name=Edem1-PE;	parent=FBgn0023511,FBtr0332580;
FBpp0084876	GH47	5.1e-110	369.3	0.1	5.9e-110	369.1	0.1	ID=FBpp0084876;	name=alpha-Man-Ic-PA;	parent=FBgn0051202,FBtr0085510;
FBpp0309400	GH5	9.9e-12	45.8	0.7	2.2e-11	44.6	0.7	ID=FBpp0309400;	name=CG15117-PE;	parent=FBgn0034417,FBtr0340458;
FBpp0309401	GH5	9.9e-12	45.8	0.7	2.2e-11	44.6	0.7	ID=FBpp0309401;	name=CG15117-PF;	parent=FBgn0034417,FBtr0340459;
FBpp0309399	GH5	1.1e-11	45.6	0.7	2.4e-11	44.5	0.7	ID=FBpp0309399;	name=CG15117-PD;	parent=FBgn0034417,FBtr0340457;
FBpp0085777	GH5	1.1e-11	45.6	0.7	2.5e-11	44.4	0.7	ID=FBpp0085777;	name=CG15117-PA;	parent=FBgn0034417,FBtr0086593;
FBpp0099475	GH5	1.1e-11	45.6	0.7	2.5e-11	44.4	0.7	ID=FBpp0099475;	name=CG15117-PC;	parent=FBgn0034417,FBtr0100129;
FBpp0085778	GH5	1.2e-11	45.5	0.7	2.6e-11	44.4	0.7	ID=FBpp0085778;	name=CG15117-PB;	parent=FBgn0034417,FBtr0086594;
FBpp0085217	GH5	5.2e-07	30.3	0.2	9.9e-07	29.4	0.2	ID=FBpp0085217;	name=betaGlu-PA;	parent=FBgn0270927,FBtr0085858;
FBpp0288666	GH63	2.9e-26	93	0	8e-26	91.5	0	ID=FBpp0288666;	name=GCS1-PB;	parent=FBgn0030289,FBtr0290227;
FBpp0298826	GH63	2.9e-26	93	0	8e-26	91.5	0	ID=FBpp0298826;	name=GCS1-PC;	parent=FBgn0030289,FBtr0307491;
FBpp0301834	GH65	1e-86	292	0	3.3e-86	290.3	0	ID=FBpp0301834;	name=CG16965-PC;	parent=FBgn0032387,FBtr0310149;
FBpp0086674	GH76	1.1e-10	42.2	0.1	0.00071	19.8	0	ID=FBpp0086674;	name=CG8613-PA;	parent=FBgn0033924,FBtr0087546;
FBpp0086295	GH78	1.3e-06	28.2	0	2.2e-06	27.4	0	ID=FBpp0086295;	name=CG6262-PB;	parent=FBgn0034121,FBtr0087151;
FBpp0086296	GH78	1.4e-06	28	0	2.8e-06	27.1	0	ID=FBpp0086296;	name=CG6262-PA;	parent=FBgn0034121,FBtr0087152;
FBpp0310264	GH78	9.3e-06	25.4	0.1	1.5e-05	24.7	0.1	ID=FBpp0310264;	name=CG33090-PC;	parent=FBgn0028916,FBtr0343673;
FBpp0083001	GH79	6e-09	36.1	0.1	1.2e-08	35.1	0.1	ID=FBpp0083001;	name=CG14309-PA;	parent=FBgn0038611,FBtr0083580;
FBpp0083452	GH84	1.7e-93	313.9	0	2.7e-93	313.2	0	ID=FBpp0083452;	name=Oga-PA;	parent=FBgn0038870,FBtr0084050;
FBpp0074206	GH85	1.1e-80	272.3	3	9.6e-80	269.2	3	ID=FBpp0074206;	name=CG5613-PB;	parent=FBgn0030839,FBtr0074432;
FBpp0074205	GH85	1.6e-80	271.8	3	1.3e-79	268.8	3	ID=FBpp0074205;	name=CG5613-PA;	parent=FBgn0030839,FBtr0074431;
FBpp0079316	GH89	2.6e-227	757	1.6	3e-227	756.8	1.6	ID=FBpp0079316;	name=CG13397-PA;	parent=FBgn0014417,FBtr0079711;
FBpp0304313	GH89	2.6e-227	757	1.6	3e-227	756.8	1.6	ID=FBpp0304313;	name=CG13397-PB;	parent=FBgn0014417,FBtr0331991;
FBpp0075774	GH93	4.8e-08	33.3	0.9	2.8	7.8	0	ID=FBpp0075774;	name=CG17826-PA;	parent=FBgn0036227,FBtr0076042;
FBpp0078757	GH99	7e-91	305.9	0	8.7e-91	305.6	0	ID=FBpp0078757;	name=CG14015-PA;	parent=FBgn0031716,FBtr0079126;
FBpp0075394	GT10	2.4e-91	307.2	12.1	3.3e-91	306.7	12.1	ID=FBpp0075394;	name=FucTA-PA;	parent=FBgn0036485,FBtr0075641;
FBpp0304215	GT10	2.4e-91	307.2	12.1	3.3e-91	306.7	12.1	ID=FBpp0304215;	name=FucTA-PB;	parent=FBgn0036485,FBtr0331831;
FBpp0289204	GT10	3.2e-91	306.8	0	3.9e-91	306.5	0	ID=FBpp0289204;	name=FucTC-PB;	parent=FBgn0044872,FBtr0299926;
FBpp0079411	GT10	2.6e-82	277.5	2.9	3.5e-82	277.1	2.9	ID=FBpp0079411;	name=FucTB-PA;	parent=FBgn0032117,FBtr0079811;
FBpp0312203	GT10	2.6e-82	277.5	2.9	3.5e-82	277.1	2.9	ID=FBpp0312203;	name=FucTB-PD;	parent=FBgn0032117,FBtr0346623;
FBpp0072577	GT10	1.3e-54	186.3	0.1	1.8e-54	185.9	0.1	ID=FBpp0072577;	name=FucTD-PA;	parent=FBgn0035217,FBtr0072693;
FBpp0310076	GT10	9.1e-33	114.6	0.9	1.2e-32	114.2	0.9	ID=FBpp0310076;	name=FucTB-PC;	parent=FBgn0032117,FBtr0343431;
FBpp0085571	GT13	1.1e-154	516	0.2	1.3e-154	515.7	0.2	ID=FBpp0085571;	name=Mgat1-PA;	parent=FBgn0034521,FBtr0086259;
FBpp0072782	GT14	1.3e-83	281	0.1	1.8e-83	280.5	0.1	ID=FBpp0072782;	name=oxt-PB;	parent=FBgn0015360,FBtr0072904;
FBpp0099836	GT16	1.2e-157	525.1	12.3	1.6e-157	524.8	12.3	ID=FBpp0099836;	name=Mgat2-PB;	parent=FBgn0039738,FBtr0100418;
FBpp0084967	GT16	2.7e-153	510.9	17.4	4.6e-96	322.7	5.1	ID=FBpp0084967;	name=Mgat2-PA;	parent=FBgn0039738,FBtr0085602;
FBpp0306759	GT16	1.4e-152	508.5	17.1	4.8e-95	319.3	5.2	ID=FBpp0306759;	name=Mgat2-PC;	parent=FBgn0039738,FBtr0334705;
FBpp0080068	GT17	2.2e-33	116.4	0.7	8.4e-32	111.3	0.1	ID=FBpp0080068;	name=Mgat3-PA;	parent=FBgn0051849,FBtr0080490;
FBpp0081852	GT1	1.6e-41	144.1	0.7	2.1e-41	143.7	0	ID=FBpp0081852;	name=Ugt35E2-PA;	parent=FBgn0040255,FBtr0082376;
FBpp0081813	GT1	4.6e-41	142.6	0	7.8e-41	141.9	0	ID=FBpp0081813;	name=Ugt302E1-PA;	parent=FBgn0040257,FBtr0082337;
FBpp0081851	GT1	9e-40	138.4	0	1.5e-39	137.6	0	ID=FBpp0081851;	name=Ugt35B1-PA;	parent=FBgn0026314,FBtr0082375;
FBpp0081814	GT1	1.9e-37	130.8	0	2.9e-37	130.1	0	ID=FBpp0081814;	name=Ugt302C1-PA;	parent=FBgn0040259,FBtr0082338;
FBpp0085174	GT1	2e-37	130.7	0	4.6e-37	129.5	0	ID=FBpp0085174;	name=Ugt35D1-PA;	parent=FBgn0051002,FBtr0085813;
FBpp0300388	GT1	2e-37	130.7	0	3.5e-37	129.9	0	ID=FBpp0300388;	name=Ugt35E1-PB;	parent=FBgn0040253,FBtr0308027;
FBpp0081854	GT1	8.4e-37	128.6	0	1.3e-36	128	0	ID=FBpp0081854;	name=Ugt302K1-PA;	parent=FBgn0040251,FBtr0082378;
FBpp0311934	GT1	8.4e-37	128.6	0	1.3e-36	128	0	ID=FBpp0311934;	name=Ugt302K1-PB;	parent=FBgn0040251,FBtr0346101;
FBpp0112233	GT1	1.4e-36	128	0	2.3e-36	127.2	0	ID=FBpp0112233;	name=Ugt35C1-PB;	parent=FBgn0040256,FBtr0113321;
FBpp0081850	GT1	6.6e-35	122.4	0	1e-34	121.8	0	ID=FBpp0081850;	name=Ugt35A1-PA;	parent=FBgn0026315,FBtr0082374;
FBpp0080468	GT1	9.8e-35	121.9	0	1.5e-34	121.3	0	ID=FBpp0080468;	name=Ugt37D1-PA;	parent=FBgn0040260,FBtr0080911;
FBpp0080469	GT1	9.8e-35	121.9	0	1.5e-34	121.3	0	ID=FBpp0080469;	name=Ugt37D1-PB;	parent=FBgn0040260,FBtr0080912;
FBpp0311165	GT1	9.8e-35	121.9	0	1.5e-34	121.3	0	ID=FBpp0311165;	name=Ugt37D1-PC;	parent=FBgn0040260,FBtr0344850;
FBpp0083810	GT1	1.2e-34	121.5	0	8.5e-34	118.8	0	ID=FBpp0083810;	name=Ugt303B2-PA;	parent=FBgn0039087,FBtr0084418;
FBpp0080466	GT1	2.8e-34	120.4	0	3e-33	117	0	ID=FBpp0080466;	name=Ugt37C2-PA;	parent=FBgn0040262,FBtr0080909;
FBpp0304010	GT1	2.8e-34	120.4	0	3e-33	117	0	ID=FBpp0304010;	name=Ugt37C2-PB;	parent=FBgn0040262,FBtr0331620;
FBpp0080467	GT1	5e-34	119.5	0	1.3e-33	118.2	0	ID=FBpp0080467;	name=Ugt37E1-PA;	parent=FBgn0040261,FBtr0080910;
FBpp0086224	GT1	7.3e-34	119	0	1.1e-33	118.4	0	ID=FBpp0086224;	name=Ugt37C1-PA;	parent=FBgn0026754,FBtr0087076;
FBpp0080618	GT1	7.5e-33	115.7	0	1.4e-32	114.7	0	ID=FBpp0080618;	name=Ugt301D1-PA;	parent=FBgn0032684,FBtr0081068;
FBpp0294065	GT1	7.5e-33	115.7	0	1.4e-32	114.7	0	ID=FBpp0294065;	name=Ugt301D1-PB;	parent=FBgn0032684,FBtr0305619;
FBpp0081849	GT1	1e-32	115.3	0	3.6e-32	113.4	0	ID=FBpp0081849;	name=Ugt304A1-PA;	parent=FBgn0040250,FBtr0082373;
FBpp0081816	GT1	8.6e-32	112.2	0	1.3e-31	111.6	0	ID=FBpp0081816;	name=Ugt303A1-PA;	parent=FBgn0040252,FBtr0082340;
FBpp0307204	GT1	8.6e-32	112.2	0	1.3e-31	111.6	0	ID=FBpp0307204;	name=Ugt303A1-PB;	parent=FBgn0040252,FBtr0335217;
FBpp0306935	GT1	1.2e-31	111.7	0	2.9e-31	110.5	0	ID=FBpp0306935;	name=Ugt49B2-PD;	parent=FBgn0038886,FBtr0334915;
FBpp0290042	GT1	1.2e-31	111.7	0.2	2.6e-30	107.3	0.1	ID=FBpp0290042;	name=Ugt36F1-PB;	parent=FBgn0027074,FBtr0300818;
FBpp0085404	GT1	6.1e-31	109.4	0	2.3e-30	107.5	0	ID=FBpp0085404;	name=Ugt50B3-PB;	parent=FBgn0050438,FBtr0086068;
FBpp0085405	GT1	6.1e-31	109.4	0	2.3e-30	107.5	0	ID=FBpp0085405;	name=Ugt50B3-PC;	parent=FBgn0050438,FBtr0086069;
FBpp0085406	GT1	6.1e-31	109.4	0	2.3e-30	107.5	0	ID=FBpp0085406;	name=Ugt50B3-PD;	parent=FBgn0050438,FBtr0086070;
FBpp0307246	GT1	6.1e-31	109.4	0	2.3e-30	107.5	0	ID=FBpp0307246;	name=Ugt50B3-PE;	parent=FBgn0050438,FBtr0335263;
FBpp0428171	GT1	7e-31	109.2	0	9.9e-31	108.7	0	ID=FBpp0428171;	name=Ugt37A1-PB;	parent=FBgn0026756,FBtr0479837;
FBpp0083812	GT1	7.2e-31	109.2	0	1.4e-30	108.2	0	ID=FBpp0083812;	name=Ugt303B3-PA;	parent=FBgn0039085,FBtr0084420;
FBpp0085403	GT1	1.1e-30	108.5	0	1.5e-30	108.1	0	ID=FBpp0085403;	name=Ugt50B3-PA;	parent=FBgn0050438,FBtr0086067;
FBpp0080654	GT1	1.7e-29	104.7	1.3	6.9e-29	102.7	0.1	ID=FBpp0080654;	name=Ugt36D1-PA;	parent=FBgn0032713,FBtr0081104;
FBpp0300798	GT1	1.7e-29	104.7	1.3	6.9e-29	102.7	0.1	ID=FBpp0300798;	name=Ugt36D1-PC;	parent=FBgn0032713,FBtr0308574;
FBpp0300799	GT1	1.7e-29	104.7	1.3	6.9e-29	102.7	0.1	ID=FBpp0300799;	name=Ugt36D1-PD;	parent=FBgn0032713,FBtr0308575;
FBpp0310382	GT1	1.7e-29	104.7	1.3	6.9e-29	102.7	0.1	ID=FBpp0310382;	name=Ugt36D1-PE;	parent=FBgn0032713,FBtr0343833;
FBpp0071550	GT1	1.8e-29	104.6	0.1	3.9e-29	103.5	0	ID=FBpp0071550;	name=Ugt49C1-PA;	parent=FBgn0034605,FBtr0071624;
FBpp0110111	GT1	1.8e-29	104.6	0.1	3.9e-29	103.5	0	ID=FBpp0110111;	name=Ugt49C1-PB;	parent=FBgn0034605,FBtr0110814;
FBpp0077221	GT1	3.9e-29	103.5	0	5.5e-29	103	0	ID=FBpp0077221;	name=Ugt36A1-PA;	parent=FBgn0015663,FBtr0077532;
FBpp0308647	GT1	3.9e-29	103.5	0	5.5e-29	103	0	ID=FBpp0308647;	name=Ugt36A1-PB;	parent=FBgn0015663,FBtr0339571;
FBpp0071551	GT1	9.3e-29	102.2	0	2e-28	101.1	0	ID=FBpp0071551;	name=Ugt49B1-PA;	parent=FBgn0027073,FBtr0071625;
FBpp0078872	GT1	1.1e-28	102	0	1.7e-28	101.4	0	ID=FBpp0078872;	name=Ugt37B1-PA;	parent=FBgn0026755,FBtr0079242;
FBpp0291574	GT1	2.6e-28	100.8	0	3.5e-28	100.4	0	ID=FBpp0291574;	name=Ugt37A3-PB;	parent=FBgn0038083,FBtr0302379;
FBpp0080655	GT1	5.2e-28	99.8	0.1	3.1e-27	97.3	0	ID=FBpp0080655;	name=Ugt36E1-PA;	parent=FBgn0027070,FBtr0081105;
FBpp0080656	GT1	5.2e-28	99.8	0.1	3.1e-27	97.3	0	ID=FBpp0080656;	name=Ugt36E1-PB;	parent=FBgn0027070,FBtr0081106;
FBpp0080657	GT1	5.2e-28	99.8	0.1	3.1e-27	97.3	0	ID=FBpp0080657;	name=Ugt36E1-PC;	parent=FBgn0027070,FBtr0081107;
FBpp0080658	GT1	5.2e-28	99.8	0.1	3.1e-27	97.3	0	ID=FBpp0080658;	name=Ugt36E1-PD;	parent=FBgn0027070,FBtr0081108;
FBpp0288390	GT1	2.1e-26	94.5	0	3.4e-26	93.8	0	ID=FBpp0288390;	name=Ugt307A1-PB;	parent=FBgn0031887,FBtr0289952;
FBpp0082126	GT1	6.1e-26	93	0	7.7e-26	92.7	0	ID=FBpp0082126;	name=Ugt37A2-PA;	parent=FBgn0038082,FBtr0082657;
FBpp0292541	GT1	2.1e-23	84.7	0	4.2e-23	83.7	0	ID=FBpp0292541;	name=Ugt303B1-PB;	parent=FBgn0039086,FBtr0303507;
FBpp0083811	GT1	2.4e-23	84.5	0	4.2e-23	83.7	0	ID=FBpp0083811;	name=Ugt303B1-PA;	parent=FBgn0039086,FBtr0084419;
FBpp0074804	GT1	2.2e-17	64.9	0	5.3e-17	63.7	0	ID=FBpp0074804;	name=Ugt316A1-PA;	parent=FBgn0036842,FBtr0075037;
FBpp0304894	GT1	2.2e-17	64.9	0	5.3e-17	63.7	0	ID=FBpp0304894;	name=Ugt316A1-PB;	parent=FBgn0036842,FBtr0332648;
FBpp0071845	GT1	4.6e-16	60.6	0.5	9.7e-16	59.5	0	ID=FBpp0071845;	name=Ugt317A1-PA;	parent=FBgn0040091,FBtr0071934;
FBpp0311614	GT1	4.6e-16	60.6	0.5	9.7e-16	59.5	0	ID=FBpp0311614;	name=Ugt317A1-PB;	parent=FBgn0040091,FBtr0345505;
FBpp0073060	GT1	3.6e-12	47.8	0	5.8e-12	47.1	0	ID=FBpp0073060;	name=Ugt305A1-PA;	parent=FBgn0042179,FBtr0073204;
FBpp0305195	GT1	3.6e-12	47.8	0	5.8e-12	47.1	0	ID=FBpp0305195;	name=Ugt305A1-PB;	parent=FBgn0042179,FBtr0332979;
FBpp0077121	GT20	5.7e-165	550.2	0	7.6e-165	549.8	0	ID=FBpp0077121;	name=Tps1-PA;	parent=FBgn0027560,FBtr0077431;
FBpp0071669	GT21	2.6e-74	250.4	0	3.3e-74	250.1	0	ID=FBpp0071669;	name=GlcT-PA;	parent=FBgn0067102,FBtr0071755;
FBpp0073009	GT22	4.7e-103	346.1	34.3	5.6e-103	345.9	34.3	ID=FBpp0073009;	name=PIG-B-PB;	parent=FBgn0035464,FBtr0073150;
FBpp0073008	GT22	5.6e-103	345.9	34.3	6.7e-103	345.6	34.3	ID=FBpp0073008;	name=PIG-B-PA;	parent=FBgn0035464,FBtr0073149;
FBpp0084183	GT22	2.9e-92	310.6	35	3.4e-92	310.4	35	ID=FBpp0084183;	name=Alg9-PA;	parent=FBgn0039293,FBtr0084808;
FBpp0081608	GT22	5.1e-86	290.1	33.6	7.2e-86	289.6	33.6	ID=FBpp0081608;	name=Alg12-PA;	parent=FBgn0037743,FBtr0082130;
FBpp0310802	GT22	3.3e-76	257.8	39.3	4.1e-76	257.5	39.3	ID=FBpp0310802;	name=PIG-Z-PA;	parent=FBgn0266438,FBtr0344430;
FBpp0073457	GT23	8.8e-129	430	0	1.5e-128	429.3	0	ID=FBpp0073457;	name=FucT6-PA;	parent=FBgn0030327,FBtr0073620;
FBpp0074831	GT24	2.5e-130	433.9	2.5	1e-129	431.9	2.1	ID=FBpp0074831;	name=Uggt-PA;	parent=FBgn0014075,FBtr0075064;
FBpp0078732	GT25	7.1e-41	140.9	0	1.1e-40	140.2	0	ID=FBpp0078732;	name=CG31915-PA;	parent=FBgn0051915,FBtr0079099;
FBpp0110323	GT27	2.9e-130	434.7	0	3.7e-130	434.3	0	ID=FBpp0110323;	name=Pgant5-PB;	parent=FBgn0031681,FBtr0111024;
FBpp0078663	GT27	9.9e-130	432.9	0	1.3e-129	432.6	0	ID=FBpp0078663;	name=Pgant5-PA;	parent=FBgn0031681,FBtr0079026;
FBpp0086259	GT27	2.8e-127	424.9	0	3.6e-127	424.5	0	ID=FBpp0086259;	name=Pgant9-PB;	parent=FBgn0050463,FBtr0087113;
FBpp0112291	GT27	2.8e-127	424.9	0	3.6e-127	424.5	0	ID=FBpp0112291;	name=Pgant9-PC;	parent=FBgn0050463,FBtr0113379;
FBpp0086258	GT27	2.8e-127	424.9	0	3.6e-127	424.5	0	ID=FBpp0086258;	name=Pgant9-PA;	parent=FBgn0050463,FBtr0087112;
FBpp0112292	GT27	2.8e-127	424.9	0	3.6e-127	424.5	0	ID=FBpp0112292;	name=Pgant9-PD;	parent=FBgn0050463,FBtr0113380;
FBpp0099799	GT27	5.5e-124	414	0	6.9e-124	413.7	0	ID=FBpp0099799;	name=Pgant2-PA;	parent=FBgn0031530,FBtr0077592;
FBpp0292961	GT27	5.5e-124	414	0	6.9e-124	413.7	0	ID=FBpp0292961;	name=Pgant2-PB;	parent=FBgn0031530,FBtr0303992;
FBpp0088130	GT27	3.3e-122	408.2	0	4.6e-122	407.7	0	ID=FBpp0088130;	name=Pgant3-PA;	parent=FBgn0027558,FBtr0089061;
FBpp0080202	GT27	4.3e-120	401.3	0	5.5e-120	400.9	0	ID=FBpp0080202;	name=Pgant35A-PA;	parent=FBgn0001970,FBtr0080629;
FBpp0074395	GT27	2.5e-119	398.7	0	3.4e-119	398.3	0	ID=FBpp0074395;	name=Pgant7-PA;	parent=FBgn0030930,FBtr0074624;
FBpp0074396	GT27	2.5e-119	398.7	0	3.4e-119	398.3	0	ID=FBpp0074396;	name=Pgant7-PB;	parent=FBgn0030930,FBtr0074625;
FBpp0311917	GT27	2.5e-119	398.7	0	3.4e-119	398.3	0	ID=FBpp0311917;	name=Pgant7-PC;	parent=FBgn0030930,FBtr0346082;
FBpp0072842	GT27	3.8e-118	394.9	0	4.9e-118	394.5	0	ID=FBpp0072842;	name=Pgant6-PA;	parent=FBgn0035375,FBtr0072972;
FBpp0072843	GT27	3.8e-118	394.9	0	4.9e-118	394.5	0	ID=FBpp0072843;	name=Pgant6-PB;	parent=FBgn0035375,FBtr0072973;
FBpp0305633	GT27	3.8e-118	394.9	0	4.9e-118	394.5	0	ID=FBpp0305633;	name=Pgant6-PC;	parent=FBgn0035375,FBtr0333442;
FBpp0086464	GT27	8e-118	393.8	0	1.1e-117	393.3	0	ID=FBpp0086464;	name=Pgant1-PA;	parent=FBgn0034025,FBtr0087331;
FBpp0086465	GT27	8e-118	393.8	0	1.1e-117	393.3	0	ID=FBpp0086465;	name=Pgant1-PB;	parent=FBgn0034025,FBtr0087332;
FBpp0113016	GT27	7.9e-113	377.4	0	1e-112	377.1	0	ID=FBpp0113016;	name=Pgant4-PB;	parent=FBgn0051956,FBtr0114524;
FBpp0305447	GT27	7.9e-113	377.4	0	1e-112	377.1	0	ID=FBpp0305447;	name=Pgant4-PC;	parent=FBgn0051956,FBtr0333248;
FBpp0075331	GT27	4e-103	345.6	0	6.2e-103	344.9	0	ID=FBpp0075331;	name=Pgant8-PA;	parent=FBgn0036529,FBtr0075578;
FBpp0084684	GT27	2e-101	340	0	2.7e-101	339.6	0	ID=FBpp0084684;	name=CG10000-PA;	parent=FBgn0039596,FBtr0085315;
FBpp0077211	GT27	1.6e-97	327.2	0	2.1e-97	326.8	0	ID=FBpp0077211;	name=CG31776-PA;	parent=FBgn0051776,FBtr0077522;
FBpp0309020	GT27	3.2e-93	313.1	0	4.7e-93	312.5	0	ID=FBpp0309020;	name=Pgant1-PC;	parent=FBgn0034025,FBtr0340001;
FBpp0075334	GT27	8.1e-90	301.9	0	1.1e-89	301.5	0	ID=FBpp0075334;	name=CG7579-PA;	parent=FBgn0036528,FBtr0075581;
FBpp0075330	GT27	8.2e-89	298.6	0	1e-88	298.3	0	ID=FBpp0075330;	name=CG7304-PB;	parent=FBgn0036527,FBtr0075577;
FBpp0112293	GT27	3.3e-55	188.3	0.7	4.1e-55	188	0.7	ID=FBpp0112293;	name=Pgant9-PE;	parent=FBgn0050463,FBtr0113381;
FBpp0080817	GT27	2.1e-10	41.2	0	6.6e-10	39.5	0	ID=FBpp0080817;	name=Dpm1-PA;	parent=FBgn0032799,FBtr0081279;
FBpp0079234	GT27	8.2e-08	32.7	0	1.1e-07	32.2	0	ID=FBpp0079234;	name=wol-PA;	parent=FBgn0261020,FBtr0079614;
FBpp0080467	GT28	1.9e-10	41.5	0	3.9e-10	40.5	0	ID=FBpp0080467;	name=Ugt37E1-PA;	parent=FBgn0040261,FBtr0080910;
FBpp0084782	GT28	4.8e-10	40.1	0	5.4e-10	40	0	ID=FBpp0084782;	name=Alg13-PA;	parent=FBgn0039639,FBtr0085413;
FBpp0080466	GT28	1.9e-09	38.2	0	5.7e-09	36.7	0	ID=FBpp0080466;	name=Ugt37C2-PA;	parent=FBgn0040262,FBtr0080909;
FBpp0304010	GT28	1.9e-09	38.2	0	5.7e-09	36.7	0	ID=FBpp0304010;	name=Ugt37C2-PB;	parent=FBgn0040262,FBtr0331620;
FBpp0086224	GT28	6.5e-09	36.5	0	1.4e-08	35.4	0	ID=FBpp0086224;	name=Ugt37C1-PA;	parent=FBgn0026754,FBtr0087076;
FBpp0083810	GT28	3.4e-08	34.1	0	5.5e-08	33.5	0	ID=FBpp0083810;	name=Ugt303B2-PA;	parent=FBgn0039087,FBtr0084418;
FBpp0080468	GT28	7.3e-08	33.1	0	1.3e-07	32.2	0	ID=FBpp0080468;	name=Ugt37D1-PA;	parent=FBgn0040260,FBtr0080911;
FBpp0080469	GT28	7.3e-08	33.1	0	1.3e-07	32.2	0	ID=FBpp0080469;	name=Ugt37D1-PB;	parent=FBgn0040260,FBtr0080912;
FBpp0311165	GT28	7.3e-08	33.1	0	1.3e-07	32.2	0	ID=FBpp0311165;	name=Ugt37D1-PC;	parent=FBgn0040260,FBtr0344850;
FBpp0288390	GT28	8.4e-08	32.9	0	1.4e-07	32.1	0	ID=FBpp0288390;	name=Ugt307A1-PB;	parent=FBgn0031887,FBtr0289952;
FBpp0428171	GT28	1.3e-07	32.2	0	3e-07	31.1	0	ID=FBpp0428171;	name=Ugt37A1-PB;	parent=FBgn0026756,FBtr0479837;
FBpp0081814	GT28	1.8e-07	31.8	0	3.2e-07	31	0	ID=FBpp0081814;	name=Ugt302C1-PA;	parent=FBgn0040259,FBtr0082338;
FBpp0291574	GT28	4.3e-07	30.6	0	1.9e-06	28.5	0	ID=FBpp0291574;	name=Ugt37A3-PB;	parent=FBgn0038083,FBtr0302379;
FBpp0078872	GT28	4.5e-07	30.5	0	8.5e-07	29.6	0	ID=FBpp0078872;	name=Ugt37B1-PA;	parent=FBgn0026755,FBtr0079242;
FBpp0082126	GT28	5e-07	30.3	0	1.4e-06	28.9	0	ID=FBpp0082126;	name=Ugt37A2-PA;	parent=FBgn0038082,FBtr0082657;
FBpp0073060	GT28	3.2e-06	27.7	0	1.4e-05	25.7	0	ID=FBpp0073060;	name=Ugt305A1-PA;	parent=FBgn0042179,FBtr0073204;
FBpp0305195	GT28	3.2e-06	27.7	0	1.4e-05	25.7	0	ID=FBpp0305195;	name=Ugt305A1-PB;	parent=FBgn0042179,FBtr0332979;
FBpp0083812	GT28	3.7e-06	27.5	0	6.8e-06	26.7	0	ID=FBpp0083812;	name=Ugt303B3-PA;	parent=FBgn0039085,FBtr0084420;
FBpp0081849	GT28	4e-06	27.4	0	7.8e-06	26.5	0	ID=FBpp0081849;	name=Ugt304A1-PA;	parent=FBgn0040250,FBtr0082373;
FBpp0081852	GT28	5.5e-06	26.9	0	9.5e-06	26.2	0	ID=FBpp0081852;	name=Ugt35E2-PA;	parent=FBgn0040255,FBtr0082376;
FBpp0085174	GT28	8.4e-06	26.4	0	1.4e-05	25.6	0	ID=FBpp0085174;	name=Ugt35D1-PA;	parent=FBgn0051002,FBtr0085813;
FBpp0081813	GT28	8.5e-06	26.3	0	1.5e-05	25.5	0	ID=FBpp0081813;	name=Ugt302E1-PA;	parent=FBgn0040257,FBtr0082337;
FBpp0072347	GT29	3.6e-50	171.5	0	6.5e-50	170.7	0	ID=FBpp0072347;	name=SiaT-PA;	parent=FBgn0035050,FBtr0072442;
FBpp0072346	GT29	4e-50	171.4	0	7.3e-50	170.5	0	ID=FBpp0072346;	name=SiaT-PB;	parent=FBgn0035050,FBtr0072441;
FBpp0079198	GT31	5.5e-51	173.8	0.2	1e-50	172.9	0.2	ID=FBpp0079198;	name=CG8668-PA;	parent=FBgn0031988,FBtr0079576;
FBpp0308728	GT31	5.5e-51	173.8	0.2	1e-50	172.9	0.2	ID=FBpp0308728;	name=CG8668-PB;	parent=FBgn0031988,FBtr0339671;
FBpp0087156	GT31	6.3e-50	170.4	0.1	1e-49	169.7	0.1	ID=FBpp0087156;	name=CG30036-PA;	parent=FBgn0050036,FBtr0088050;
FBpp0079197	GT31	1.1e-49	169.6	0.1	1.5e-49	169.1	0.1	ID=FBpp0079197;	name=CG8673-PA;	parent=FBgn0031986,FBtr0079575;
FBpp0070606	GT31	1.3e-49	169.4	0.1	1.6e-49	169	0.1	ID=FBpp0070606;	name=brn-PA;	parent=FBgn0000221,FBtr0070638;
FBpp0087154	GT31	3.8e-49	167.8	0	5.8e-49	167.2	0	ID=FBpp0087154;	name=GalT1-PB;	parent=FBgn0053145,FBtr0088048;
FBpp0087155	GT31	5.1e-44	151.1	0	8.3e-44	150.4	0	ID=FBpp0087155;	name=CG30037-PA;	parent=FBgn0050037,FBtr0088049;
FBpp0073166	GT31	3.8e-42	145	0.3	5.4e-42	144.5	0.3	ID=FBpp0073166;	name=CG11357-PA;	parent=FBgn0035558,FBtr0073310;
FBpp0112055	GT31	3.8e-42	145	0.3	5.4e-42	144.5	0.3	ID=FBpp0112055;	name=CG11357-PB;	parent=FBgn0035558,FBtr0113142;
FBpp0112056	GT31	3.8e-42	145	0.3	5.4e-42	144.5	0.3	ID=FBpp0112056;	name=CG11357-PC;	parent=FBgn0035558,FBtr0113143;
FBpp0293524	GT31	3.8e-42	145	0.3	5.4e-42	144.5	0.3	ID=FBpp0293524;	name=CG11357-PD;	parent=FBgn0035558,FBtr0304987;
FBpp0070102	GT31	1.5e-37	130	0	2e-37	129.6	0	ID=FBpp0070102;	name=CG3038-PB;	parent=FBgn0040373,FBtr0070107;
FBpp0070103	GT31	1.8e-37	129.7	0	2.5e-37	129.3	0	ID=FBpp0070103;	name=CG3038-PA;	parent=FBgn0040373,FBtr0070108;
FBpp0087807	GT31	4.2e-37	128.5	4.1	2.4e-36	126	4.1	ID=FBpp0087807;	name=beta3GalTII-PA;	parent=FBgn0033315,FBtr0088728;
FBpp0309182	GT31	1.3e-24	87.8	0	2.2e-13	51.2	0	ID=FBpp0309182;	name=CG3038-PC;	parent=FBgn0040373,FBtr0340207;
FBpp0271759	GT31	4.1e-22	79.6	1.4	6.9e-17	62.6	0.1	ID=FBpp0271759;	name=CG18558-PB;	parent=FBgn0031469,FBtr0273251;
FBpp0077375	GT31	1.1e-21	78.2	0.3	2.7e-20	73.7	0.3	ID=FBpp0077375;	name=CG3119-PA;	parent=FBgn0031466,FBtr0077691;
FBpp0087153	GT31	1.2e-21	78.1	0	1.9e-21	77.4	0	ID=FBpp0087153;	name=GalT1-PA;	parent=FBgn0053145,FBtr0088047;
FBpp0077305	GT31	1.3e-21	78	0.7	2.2e-20	74	0.7	ID=FBpp0077305;	name=CG2975-PA;	parent=FBgn0031468,FBtr0077619;
FBpp0079388	GT31	2e-21	77.4	0.1	3.2e-20	73.5	0.1	ID=FBpp0079388;	name=C1GalTA-PB;	parent=FBgn0032078,FBtr0079788;
FBpp0079389	GT31	2e-21	77.4	0.1	3.2e-20	73.5	0.1	ID=FBpp0079389;	name=C1GalTA-PC;	parent=FBgn0032078,FBtr0079789;
FBpp0079390	GT31	2e-21	77.4	0.1	3.2e-20	73.5	0.1	ID=FBpp0079390;	name=C1GalTA-PA;	parent=FBgn0032078,FBtr0079790;
FBpp0100166	GT31	2.7e-21	77	0.6	8.1e-20	72.2	0.6	ID=FBpp0100166;	name=CG34057-PB;	parent=FBgn0054057,FBtr0100835;
FBpp0100165	GT31	3e-21	76.8	0.6	8.7e-20	72.1	0.6	ID=FBpp0100165;	name=CG34057-PA;	parent=FBgn0054057,FBtr0100834;
FBpp0100164	GT31	3e-20	73.6	0.2	6.6e-19	69.2	0.2	ID=FBpp0100164;	name=CG34056-PA;	parent=FBgn0054056,FBtr0100833;
FBpp0288714	GT31	8.2e-20	72.1	0.2	2.2e-19	70.7	0.2	ID=FBpp0288714;	name=tgy-PC;	parent=FBgn0030984,FBtr0290275;
FBpp0310711	GT31	8.2e-20	72.1	0.2	2.2e-19	70.7	0.2	ID=FBpp0310711;	name=tgy-PE;	parent=FBgn0030984,FBtr0344323;
FBpp0078855	GT31	5.1e-19	69.5	0	1.7e-14	54.8	0	ID=FBpp0078855;	name=CG9109-PA;	parent=FBgn0031765,FBtr0079224;
FBpp0073880	GT31	1.2e-18	68.3	0	1.2e-14	55.3	0	ID=FBpp0073880;	name=Chsy-PC;	parent=FBgn0030662,FBtr0074064;
FBpp0309305	GT31	1.2e-18	68.3	0	1.2e-14	55.3	0	ID=FBpp0309305;	name=Chsy-PD;	parent=FBgn0030662,FBtr0340347;
FBpp0077925	GT31	2.8e-17	63.9	0	6.2e-17	62.7	0	ID=FBpp0077925;	name=fng-PA;	parent=FBgn0011591,FBtr0078267;
FBpp0309830	GT31	2.9e-16	60.5	0	5.4e-12	46.6	0	ID=FBpp0309830;	name=CG9109-PC;	parent=FBgn0031765,FBtr0343131;
FBpp0297909	GT31	8.4e-16	59	0.3	8.4e-16	59	0.3	ID=FBpp0297909;	name=CG8708-PC;	parent=FBgn0033271,FBtr0307066;
FBpp0087885	GT31	8.6e-16	59	0.3	8.6e-16	59	0.3	ID=FBpp0087885;	name=CG8708-PB;	parent=FBgn0033271,FBtr0088809;
FBpp0297910	GT31	8.6e-16	59	0.3	8.6e-16	59	0.3	ID=FBpp0297910;	name=CG8708-PD;	parent=FBgn0033271,FBtr0307067;
FBpp0077376	GT31	1.6e-12	48.3	0	2.5e-12	47.7	0	ID=FBpp0077376;	name=CG3119-PB;	parent=FBgn0031466,FBtr0077692;
FBpp0307129	GT31	1.8e-09	38.4	0	4.2e-09	37.2	0	ID=FBpp0307129;	name=CG2983-PB;	parent=FBgn0031472,FBtr0335130;
FBpp0288792	GT31	5.6e-09	36.8	0.5	6.5e-08	33.3	0.5	ID=FBpp0288792;	name=CG34452-PB;	parent=FBgn0085481,FBtr0299517;
FBpp0311795	GT31	5.6e-09	36.8	0.5	6.5e-08	33.3	0.5	ID=FBpp0311795;	name=CG34452-PC;	parent=FBgn0085481,FBtr0345809;
FBpp0077354	GT32	3e-16	60.4	0	2.1e-15	57.7	0	ID=FBpp0077354;	name=alpha4GT1-PA;	parent=FBgn0031491,FBtr0077670;
FBpp0289406	GT32	1.7e-14	54.8	0.1	9.5e-14	52.4	0	ID=FBpp0289406;	name=alpha4GT2-PB;	parent=FBgn0039378,FBtr0300129;
FBpp0082947	GT33	3.8e-162	540.7	0	4.4e-162	540.5	0	ID=FBpp0082947;	name=Alg1-PA;	parent=FBgn0038552,FBtr0083523;
FBpp0077501	GT35	1.3e-289	963.2	0.1	1.5e-289	963	0.1	ID=FBpp0077501;	name=GlyP-PA;	parent=FBgn0004507,FBtr0077828;
FBpp0099923	GT35	1.3e-289	963.2	0.1	1.5e-289	963	0.1	ID=FBpp0099923;	name=GlyP-PB;	parent=FBgn0004507,FBtr0100485;
FBpp0070134	GT39	4.6e-63	213.6	13.8	4.6e-63	213.6	13.8	ID=FBpp0070134;	name=tw-PA;	parent=FBgn0086368,FBtr0070139;
FBpp0307386	GT39	4.6e-63	213.6	13.8	4.6e-63	213.6	13.8	ID=FBpp0307386;	name=tw-PB;	parent=FBgn0086368,FBtr0335403;
FBpp0075877	GT39	4.7e-54	184.1	14.2	4.7e-54	184.1	14.2	ID=FBpp0075877;	name=rt-PA;	parent=FBgn0003292,FBtr0076146;
FBpp0082494	GT3	3.6e-290	964.8	0	4.3e-290	964.5	0	ID=FBpp0082494;	name=GlyS-PC;	parent=FBgn0266064,FBtr0083035;
FBpp0082495	GT3	3.6e-290	964.8	0	4.3e-290	964.5	0	ID=FBpp0082495;	name=GlyS-PB;	parent=FBgn0266064,FBtr0083036;
FBpp0305474	GT3	3.6e-290	964.8	0	4.3e-290	964.5	0	ID=FBpp0305474;	name=GlyS-PD;	parent=FBgn0266064,FBtr0333276;
FBpp0082496	GT3	4e-290	964.6	0	4.8e-290	964.4	0	ID=FBpp0082496;	name=GlyS-PA;	parent=FBgn0266064,FBtr0083037;
FBpp0085420	GT41	3e-288	959	29.9	6.9e-140	468.6	0.1	ID=FBpp0085420;	name=sxc-PB;	parent=FBgn0261403,FBtr0086084;
FBpp0085421	GT41	3e-288	959	29.9	6.9e-140	468.6	0.1	ID=FBpp0085421;	name=sxc-PA;	parent=FBgn0261403,FBtr0086085;
FBpp0085422	GT41	3e-288	959	29.9	6.9e-140	468.6	0.1	ID=FBpp0085422;	name=sxc-PC;	parent=FBgn0261403,FBtr0086086;
FBpp0296980	GT41	1.2e-40	140.6	86.6	9.4e-08	31.8	1.4	ID=FBpp0296980;	name=CG43163-PC;	parent=FBgn0262719,FBtr0305700;
FBpp0300832	GT41	1.2e-40	140.6	86.6	9.4e-08	31.8	1.4	ID=FBpp0300832;	name=CG43163-PD;	parent=FBgn0262719,FBtr0308608;
FBpp0071560	GT41	1e-39	137.5	25.4	8e-11	42	1.6	ID=FBpp0071560;	name=Tmtc3-PA;	parent=FBgn0020312,FBtr0071637;
FBpp0071561	GT41	1e-39	137.5	25.4	8e-11	42	1.6	ID=FBpp0071561;	name=Tmtc3-PB;	parent=FBgn0020312,FBtr0071638;
FBpp0082545	GT41	3.8e-37	129	17.2	4.8e-14	52.6	1.9	ID=FBpp0082545;	name=CG5038-PA;	parent=FBgn0038324,FBtr0083089;
FBpp0293601	GT41	1.4e-35	123.8	19.9	5.8e-13	49	0.1	ID=FBpp0293601;	name=CG4341-PC;	parent=FBgn0028481,FBtr0305064;
FBpp0077614	GT41	1.5e-35	123.7	19.7	6.6e-13	48.9	0.1	ID=FBpp0077614;	name=CG4341-PA;	parent=FBgn0028481,FBtr0077949;
FBpp0290896	GT41	2.2e-30	106.6	19.1	1.9e-12	47.4	0	ID=FBpp0290896;	name=CG31690-PE;	parent=FBgn0051690,FBtr0301682;
FBpp0077790	GT41	2e-25	90.2	16.1	6.3e-11	42.3	2.7	ID=FBpp0077790;	name=Stip1-PA;	parent=FBgn0024352,FBtr0078131;
FBpp0303946	GT41	3.8e-25	89.3	9.8	1.3e-11	44.6	0.2	ID=FBpp0303946;	name=Klc-PC;	parent=FBgn0010235,FBtr0331556;
FBpp0075683	GT41	4.4e-25	89.1	9.9	1.4e-11	44.5	0.2	ID=FBpp0075683;	name=Klc-PA;	parent=FBgn0010235,FBtr0075951;
FBpp0303945	GT41	4.4e-25	89.1	9.9	1.4e-11	44.5	0.2	ID=FBpp0303945;	name=Klc-PB;	parent=FBgn0010235,FBtr0331555;
FBpp0087646	GT41	2.1e-23	83.6	29.5	6.2e-07	29.1	0.4	ID=FBpp0087646;	name=CG8777-PA;	parent=FBgn0033376,FBtr0088565;
FBpp0072561	GT41	2.4e-22	80	40	8.3e-06	25.4	3.2	ID=FBpp0072561;	name=Ctr9-PB;	parent=FBgn0035205,FBtr0072668;
FBpp0072562	GT41	2.4e-22	80	40	8.3e-06	25.4	3.2	ID=FBpp0072562;	name=Ctr9-PA;	parent=FBgn0035205,FBtr0072669;
FBpp0292906	GT41	1e-21	78	9.3	2.1e-13	50.5	2	ID=FBpp0292906;	name=Utx-PD;	parent=FBgn0260749,FBtr0303903;
FBpp0079893	GT41	4.8e-21	75.8	19.8	2.7e-07	30.3	2.7	ID=FBpp0079893;	name=Tom70-PA;	parent=FBgn0032397,FBtr0080309;
FBpp0079894	GT41	4.8e-21	75.8	19.8	2.7e-07	30.3	2.7	ID=FBpp0079894;	name=Tom70-PB;	parent=FBgn0032397,FBtr0080310;
FBpp0079895	GT41	4.8e-21	75.8	19.8	2.7e-07	30.3	2.7	ID=FBpp0079895;	name=Tom70-PC;	parent=FBgn0032397,FBtr0080311;
FBpp0079664	GT41	5.2e-21	75.7	9.2	9e-13	48.4	1.2	ID=FBpp0079664;	name=Utx-PA;	parent=FBgn0260749,FBtr0080075;
FBpp0080423	GT41	7.1e-21	75.2	12.8	5.7e-10	39.2	2	ID=FBpp0080423;	name=Tpr2-PA;	parent=FBgn0032586,FBtr0080866;
FBpp0305671	GT41	7.1e-21	75.2	12.8	5.7e-10	39.2	2	ID=FBpp0305671;	name=Tpr2-PD;	parent=FBgn0032586,FBtr0333487;
FBpp0087297	GT41	2.2e-20	73.5	10.3	4.8e-09	36.1	0.3	ID=FBpp0087297;	name=BBS4-PA;	parent=FBgn0033578,FBtr0088202;
FBpp0305670	GT41	3.5e-20	72.9	12.4	6e-10	39.1	2	ID=FBpp0305670;	name=Tpr2-PC;	parent=FBgn0032586,FBtr0333486;
FBpp0080424	GT41	9.1e-20	71.5	12.9	7.9e-10	38.7	2.4	ID=FBpp0080424;	name=Tpr2-PB;	parent=FBgn0032586,FBtr0080867;
FBpp0305672	GT41	9.1e-20	71.5	12.9	7.9e-10	38.7	2.4	ID=FBpp0305672;	name=Tpr2-PE;	parent=FBgn0032586,FBtr0333488;
FBpp0070352	GT41	1e-18	68.1	8.4	7.4e-12	45.4	1.4	ID=FBpp0070352;	name=Pex5-PB;	parent=FBgn0023516,FBtr0070368;
FBpp0070351	GT41	1.3e-18	67.7	8.1	9.2e-12	45.1	1.3	ID=FBpp0070351;	name=Pex5-PA;	parent=FBgn0023516,FBtr0070367;
FBpp0076600	GT41	2.1e-18	67	13.9	9.2e-08	31.9	1.3	ID=FBpp0076600;	name=Cdc27-PA;	parent=FBgn0012058,FBtr0076890;
FBpp0305561	GT41	2.1e-18	67	13.9	9.2e-08	31.9	1.3	ID=FBpp0305561;	name=Cdc27-PB;	parent=FBgn0012058,FBtr0333369;
FBpp0308569	GT41	5.1e-17	62.4	7.1	4e-10	39.7	4.1	ID=FBpp0308569;	name=BBS4-PB;	parent=FBgn0033578,FBtr0339487;
FBpp0080894	GT41	2.8e-16	60	10.4	1.8e-11	44.1	0.4	ID=FBpp0080894;	name=Cdc23-PA;	parent=FBgn0032863,FBtr0081362;
FBpp0305185	GT41	2.8e-16	60	10.4	1.8e-11	44.1	0.4	ID=FBpp0305185;	name=Cdc23-PB;	parent=FBgn0032863,FBtr0332969;
FBpp0081552	GT41	5e-15	55.9	10.9	1.6e-08	34.4	0	ID=FBpp0081552;	name=P58IPK-PA;	parent=FBgn0037718,FBtr0082074;
FBpp0083769	GT41	1.1e-14	54.8	1.8	1.4e-07	31.3	0	ID=FBpp0083769;	name=Cdc16-PA;	parent=FBgn0025781,FBtr0084377;
FBpp0297109	GT41	1.5e-14	54.3	9.3	1.4e-08	34.6	0	ID=FBpp0297109;	name=Ttc7-PB;	parent=FBgn0021847,FBtr0305967;
FBpp0084559	GT41	3.8e-14	53	5.5	0.00011	21.6	0.1	ID=FBpp0084559;	name=pins-PA;	parent=FBgn0040080,FBtr0085189;
FBpp0085344	GT41	5.5e-14	52.4	11	1.7e-08	34.2	0.1	ID=FBpp0085344;	name=Ttc7-PA;	parent=FBgn0021847,FBtr0086000;
FBpp0080535	GT41	4.7e-13	49.3	2.2	7.6e-13	48.7	2.2	ID=FBpp0080535;	name=Sgt-PA;	parent=FBgn0032640,FBtr0080982;
FBpp0296963	GT41	4.7e-13	49.3	2.2	7.6e-13	48.7	2.2	ID=FBpp0296963;	name=Sgt-PB;	parent=FBgn0032640,FBtr0305683;
FBpp0305602	GT41	6.2e-13	49	2.5	1.2e-12	48.1	2.5	ID=FBpp0305602;	name=Utx-PE;	parent=FBgn0260749,FBtr0333410;
FBpp0079665	GT41	6.3e-13	48.9	2.5	1.2e-12	48	2.5	ID=FBpp0079665;	name=Utx-PB;	parent=FBgn0260749,FBtr0080076;
FBpp0079666	GT41	6.3e-13	48.9	2.5	1.2e-12	48	2.5	ID=FBpp0079666;	name=Utx-PC;	parent=FBgn0260749,FBtr0080077;
FBpp0071879	GT41	1.8e-12	47.4	25.9	0.0059	16	8.4	ID=FBpp0071879;	name=CG9899-PA;	parent=FBgn0034829,FBtr0071969;
FBpp0086164	GT41	1.7e-11	44.2	24.5	4.5e-08	32.9	1.8	ID=FBpp0086164;	name=CG8950-PA;	parent=FBgn0034186,FBtr0087013;
FBpp0297722	GT41	1.7e-11	44.2	24.5	4.5e-08	32.9	1.8	ID=FBpp0297722;	name=CG8950-PB;	parent=FBgn0034186,FBtr0306810;
FBpp0290395	GT41	1.7e-11	44.2	19.3	7.2e-05	22.3	1.6	ID=FBpp0290395;	name=nompB-PC;	parent=FBgn0016919,FBtr0301173;
FBpp0072164	GT41	9.1e-11	41.8	0.5	9.8e-11	41.7	0.5	ID=FBpp0072164;	name=spag-PA;	parent=FBgn0015544,FBtr0072256;
FBpp0077718	GT41	3.6e-10	39.8	0.7	1.1e-06	28.3	0	ID=FBpp0077718;	name=BBS8-PA;	parent=FBgn0031255,FBtr0078058;
FBpp0084440	GT41	1.1e-09	38.3	4	1.1e-09	38.3	4	ID=FBpp0084440;	name=Spag1-PA;	parent=FBgn0039463,FBtr0085068;
FBpp0070908	GT41	4.3e-09	36.2	0.5	2.4e-05	23.9	0.1	ID=FBpp0070908;	name=APC7-PB;	parent=FBgn0029879,FBtr0070947;
FBpp0079468	GT41	8.8e-09	35.2	4.6	1.2e-08	34.8	4.3	ID=FBpp0079468;	name=Fkbp59-PA;	parent=FBgn0029174,FBtr0079872;
FBpp0309663	GT41	8.8e-09	35.2	4.6	1.2e-08	34.8	4.3	ID=FBpp0309663;	name=Fkbp59-PB;	parent=FBgn0029174,FBtr0342837;
FBpp0082765	GT41	1e-08	35	3.5	1.2e-08	34.8	3.5	ID=FBpp0082765;	name=CG14894-PA;	parent=FBgn0038428,FBtr0083314;
FBpp0307945	GT41	1e-08	35	3.5	1.2e-08	34.8	3.5	ID=FBpp0307945;	name=CG14894-PB;	parent=FBgn0038428,FBtr0337016;
FBpp0070572	GT41	1e-08	35	1.8	1.2e-08	34.7	1.2	ID=FBpp0070572;	name=HIP-R-PB;	parent=FBgn0029676,FBtr0070597;
FBpp0070573	GT41	1e-08	35	1.8	1.2e-08	34.7	1.2	ID=FBpp0070573;	name=HIP-R-PA;	parent=FBgn0029676,FBtr0070598;
FBpp0070575	GT41	1e-08	35	1.8	1.2e-08	34.7	1.2	ID=FBpp0070575;	name=HIP-PA;	parent=FBgn0260484,FBtr0070600;
FBpp0305905	GT41	1e-08	35	1.8	1.2e-08	34.7	1.2	ID=FBpp0305905;	name=HIP-R-PD;	parent=FBgn0029676,FBtr0333764;
FBpp0070907	GT41	1.3e-08	34.6	3.1	3.6e-05	23.3	0.1	ID=FBpp0070907;	name=APC7-PA;	parent=FBgn0029879,FBtr0070946;
FBpp0083319	GT41	1.6e-08	34.4	18.4	0.0015	17.9	4.6	ID=FBpp0083319;	name=Srp72-PA;	parent=FBgn0038810,FBtr0083911;
FBpp0070402	GT41	2.1e-08	34	6.6	0.0067	15.8	3.8	ID=FBpp0070402;	name=crn-PA;	parent=FBgn0000377,FBtr0070418;
FBpp0309502	GT41	3.7e-08	33.1	22	0.0075	15.6	1.3	ID=FBpp0309502;	name=nompB-PD;	parent=FBgn0016919,FBtr0340651;
FBpp0079617	GT41	9.2e-08	31.9	0.7	1.5e-07	31.1	0.6	ID=FBpp0079617;	name=STUB1-PA;	parent=FBgn0027052,FBtr0080027;
FBpp0074918	GT41	9.4e-08	31.8	0.5	9.4e-08	31.8	0.5	ID=FBpp0074918;	name=CG5290-PA;	parent=FBgn0036772,FBtr0075152;
FBpp0074835	GT41	1.1e-07	31.6	3.1	0.00021	20.8	0.2	ID=FBpp0074835;	name=CG6841-PA;	parent=FBgn0036828,FBtr0075068;
FBpp0312391	GT41	1.1e-07	31.6	3.1	0.00021	20.8	0.2	ID=FBpp0312391;	name=CG6841-PB;	parent=FBgn0036828,FBtr0346816;
FBpp0075591	GT41	1.1e-07	31.6	4.9	1.2e-07	31.5	4.9	ID=FBpp0075591;	name=CG14105-PA;	parent=FBgn0036359,FBtr0075857;
FBpp0085923	GT41	1.3e-07	31.3	0	2.1e-07	30.6	0	ID=FBpp0085923;	name=adp-PA;	parent=FBgn0000057,FBtr0086744;
FBpp0309249	GT41	1.3e-07	31.3	0	2.1e-07	30.6	0	ID=FBpp0309249;	name=adp-PB;	parent=FBgn0000057,FBtr0340288;
FBpp0290580	GT41	2.3e-07	30.6	14.8	0.0025	17.2	0.7	ID=FBpp0290580;	name=Ttc30-PC;	parent=FBgn0032470,FBtr0301366;
FBpp0307812	GT41	2.3e-07	30.6	14.8	0.0025	17.2	0.7	ID=FBpp0307812;	name=Ttc30-PD;	parent=FBgn0032470,FBtr0336855;
FBpp0081606	GT41	3e-07	30.2	0.9	3.8e-07	29.8	0.9	ID=FBpp0081606;	name=PpD3-PA;	parent=FBgn0005777,FBtr0082128;
FBpp0081607	GT41	3e-07	30.2	0.9	3.8e-07	29.8	0.9	ID=FBpp0081607;	name=PpD3-PB;	parent=FBgn0005777,FBtr0082129;
FBpp0304082	GT41	3e-07	30.2	0.9	3.8e-07	29.8	0.9	ID=FBpp0304082;	name=PpD3-PC;	parent=FBgn0005777,FBtr0331693;
FBpp0081284	GT41	3.3e-07	30	0.5	4.9e-07	29.5	0.5	ID=FBpp0081284;	name=unc-45-PA;	parent=FBgn0010812,FBtr0081788;
FBpp0312575	GT41	3.3e-07	30	0.5	4.9e-07	29.5	0.5	ID=FBpp0312575;	name=unc-45-PB;	parent=FBgn0010812,FBtr0347497;
FBpp0082818	GT41	3.2e-06	26.8	2.7	4.2e-06	26.4	2.2	ID=FBpp0082818;	name=EMC2A-PA;	parent=FBgn0038462,FBtr0083375;
FBpp0307992	GT41	3.2e-06	26.8	2.7	4.2e-06	26.4	2.2	ID=FBpp0307992;	name=EMC2A-PB;	parent=FBgn0038462,FBtr0337063;
FBpp0082819	GT41	3.5e-06	26.6	3	4.9e-06	26.1	2.4	ID=FBpp0082819;	name=EMC2B-PA;	parent=FBgn0038461,FBtr0083376;
FBpp0307993	GT41	3.5e-06	26.6	3	4.9e-06	26.1	2.4	ID=FBpp0307993;	name=EMC2B-PB;	parent=FBgn0038461,FBtr0337064;
FBpp0086749	GT41	4.3e-06	26.3	6.9	0.046	13	6.8	ID=FBpp0086749;	name=fand-PA;	parent=FBgn0033859,FBtr0087623;
FBpp0292061	GT41	5e-06	26.1	1.2	5e-06	26.1	1.2	ID=FBpp0292061;	name=CG6621-PB;	parent=FBgn0037855,FBtr0302935;
FBpp0081805	GT41	5.9e-06	25.9	1.3	5.9e-06	25.9	1.3	ID=FBpp0081805;	name=CG6621-PA;	parent=FBgn0037855,FBtr0082329;
FBpp0077934	GT41	6.2e-06	25.8	0.1	8.3e-06	25.4	0.1	ID=FBpp0077934;	name=CG11396-PA;	parent=FBgn0037022,FBtr0078276;
FBpp0291434	GT41	8.9e-06	25.3	1.6	0.00051	19.5	0.2	ID=FBpp0291434;	name=CG31687-PB;	parent=FBgn0051687,FBtr0302224;
FBpp0305184	GT41	8.9e-06	25.3	1.6	0.00051	19.5	0.2	ID=FBpp0305184;	name=CG31687-PC;	parent=FBgn0051687,FBtr0332968;
FBpp0070612	GT43	4.7e-57	193.8	0	5.8e-57	193.5	0	ID=FBpp0070612;	name=GlcAT-I-PA;	parent=FBgn0066114,FBtr0070644;
FBpp0079438	GT43	2.7e-54	184.8	0	3.4e-54	184.4	0	ID=FBpp0079438;	name=GlcAT-S-PA;	parent=FBgn0032135,FBtr0079841;
FBpp0079439	GT43	4.8e-54	183.9	0	6.2e-54	183.6	0	ID=FBpp0079439;	name=GlcAT-S-PB;	parent=FBgn0032135,FBtr0079842;
FBpp0291409	GT43	7e-54	183.4	0	9.3e-54	183	0	ID=FBpp0291409;	name=GlcAT-S-PC;	parent=FBgn0032135,FBtr0302199;
FBpp0075920	GT43	1.8e-53	182.1	0	2.3e-53	181.8	0	ID=FBpp0075920;	name=GlcAT-P-PB;	parent=FBgn0036144,FBtr0076190;
FBpp0099840	GT43	1.8e-53	182.1	0	2.3e-53	181.8	0	ID=FBpp0099840;	name=GlcAT-P-PC;	parent=FBgn0036144,FBtr0100422;
FBpp0297365	GT43	1.8e-53	182.1	0	2.3e-53	181.8	0	ID=FBpp0297365;	name=GlcAT-P-PE;	parent=FBgn0036144,FBtr0306255;
FBpp0075919	GT43	3.9e-53	181	0	6.6e-53	180.2	0	ID=FBpp0075919;	name=GlcAT-P-PA;	parent=FBgn0036144,FBtr0076189;
FBpp0297364	GT43	3.9e-53	181	0	6.6e-53	180.2	0	ID=FBpp0297364;	name=GlcAT-P-PD;	parent=FBgn0036144,FBtr0306254;
FBpp0086624	GT47	1.4e-53	182.9	0	2.2e-53	182.3	0	ID=FBpp0086624;	name=ttv-PA;	parent=FBgn0265974,FBtr0087495;
FBpp0305367	GT47	1.4e-53	182.9	0	2.2e-53	182.3	0	ID=FBpp0305367;	name=ttv-PB;	parent=FBgn0265974,FBtr0333164;
FBpp0423167	GT47	1.5e-53	182.8	0	2.2e-53	182.2	0	ID=FBpp0423167;	name=ttv-PD;	parent=FBgn0265974,FBtr0474168;
FBpp0085763	GT47	7.3e-44	151	0	1.1e-43	150.4	0	ID=FBpp0085763;	name=botv-PA;	parent=FBgn0027535,FBtr0086579;
FBpp0099953	GT47	7.5e-44	151	0	1.2e-43	150.3	0	ID=FBpp0099953;	name=sotv-PB;	parent=FBgn0029175,FBtr0100513;
FBpp0289919	GT49	3e-68	231.2	0.6	5.5e-63	213.8	0.3	ID=FBpp0289919;	name=CG11149-PC;	parent=FBgn0031732,FBtr0300695;
FBpp0289920	GT49	3e-68	231.2	0.6	5.5e-63	213.8	0.3	ID=FBpp0289920;	name=CG11149-PD;	parent=FBgn0031732,FBtr0300696;
FBpp0304814	GT49	3e-68	231.2	0.6	5.5e-63	213.8	0.3	ID=FBpp0304814;	name=CG11149-PE;	parent=FBgn0031732,FBtr0332556;
FBpp0078799	GT49	5.5e-66	223.7	0.9	8.7e-61	206.6	0.4	ID=FBpp0078799;	name=CG11149-PB;	parent=FBgn0031732,FBtr0079168;
FBpp0078800	GT49	5.5e-66	223.7	0.9	8.7e-61	206.6	0.4	ID=FBpp0078800;	name=CG11149-PA;	parent=FBgn0031732,FBtr0079169;
FBpp0079983	GT49	1.1e-61	209.6	0	2.7e-57	195.1	0	ID=FBpp0079983;	name=CG15483-PA;	parent=FBgn0032457,FBtr0080402;
FBpp0072160	GT49	3.8e-61	207.8	5	4.7e-60	204.2	5	ID=FBpp0072160;	name=CG3253-PA;	parent=FBgn0041706,FBtr0072251;
FBpp0293957	GT49	3.8e-61	207.8	5	4.7e-60	204.2	5	ID=FBpp0293957;	name=CG3253-PB;	parent=FBgn0041706,FBtr0305505;
FBpp0290452	GT49	8e-61	206.7	0	1.3e-55	189.6	0	ID=FBpp0290452;	name=CG9171-PC;	parent=FBgn0031738,FBtr0301234;
FBpp0290453	GT49	8e-61	206.7	0	1.3e-55	189.6	0	ID=FBpp0290453;	name=CG9171-PD;	parent=FBgn0031738,FBtr0301235;
FBpp0290454	GT49	8e-61	206.7	0	1.3e-55	189.6	0	ID=FBpp0290454;	name=CG9171-PE;	parent=FBgn0031738,FBtr0301236;
FBpp0304348	GT49	8e-61	206.7	0	1.3e-55	189.6	0	ID=FBpp0304348;	name=CG9171-PF;	parent=FBgn0031738,FBtr0332038;
FBpp0304349	GT49	8e-61	206.7	0	1.3e-55	189.6	0	ID=FBpp0304349;	name=CG9171-PG;	parent=FBgn0031738,FBtr0332039;
FBpp0072887	GT4	1e-31	110.5	0	1.6e-31	109.9	0	ID=FBpp0072887;	name=Alg2-PA;	parent=FBgn0035401,FBtr0073023;
FBpp0078076	GT4	1.7e-29	103.3	0	1.7e-28	100	0	ID=FBpp0078076;	name=Alg11-PA;	parent=FBgn0037108,FBtr0078422;
FBpp0305584	GT4	1.7e-29	103.3	0	1.7e-28	100	0	ID=FBpp0305584;	name=Alg11-PB;	parent=FBgn0037108,FBtr0333392;
FBpp0086042	GT4	5.4e-28	98.4	0	9.1e-28	97.7	0	ID=FBpp0086042;	name=PIG-A-PA;	parent=FBgn0034270,FBtr0086882;
FBpp0309242	GT4	5.4e-28	98.4	0	9.1e-28	97.7	0	ID=FBpp0309242;	name=PIG-A-PB;	parent=FBgn0034270,FBtr0340278;
FBpp0073919	GT4	1.2e-12	48.5	0	4.2e-12	46.8	0	ID=FBpp0073919;	name=CG15914-PA;	parent=FBgn0030700,FBtr0074105;
FBpp0082947	GT4	5.1e-08	33.5	0	3.6e-07	30.7	0	ID=FBpp0082947;	name=Alg1-PA;	parent=FBgn0038552,FBtr0083523;
FBpp0082494	GT4	1.9e-06	28.4	0.1	5.8e-05	23.6	0	ID=FBpp0082494;	name=GlyS-PC;	parent=FBgn0266064,FBtr0083035;
FBpp0082495	GT4	1.9e-06	28.4	0.1	5.8e-05	23.6	0	ID=FBpp0082495;	name=GlyS-PB;	parent=FBgn0266064,FBtr0083036;
FBpp0305474	GT4	1.9e-06	28.4	0.1	5.8e-05	23.6	0	ID=FBpp0305474;	name=GlyS-PD;	parent=FBgn0266064,FBtr0333276;
FBpp0082496	GT4	2.1e-06	28.3	0.1	6e-05	23.5	0	ID=FBpp0082496;	name=GlyS-PA;	parent=FBgn0266064,FBtr0083037;
FBpp0071597	GT50	1.4e-75	255	26.7	2.1e-75	254.5	26.7	ID=FBpp0071597;	name=PIG-M-PA;	parent=FBgn0034649,FBtr0071680;
FBpp0071598	GT50	1.4e-75	255	26.7	2.1e-75	254.5	26.7	ID=FBpp0071598;	name=PIG-M-PB;	parent=FBgn0034649,FBtr0071681;
FBpp0075440	GT54	2e-127	424.7	1	2.7e-127	424.2	1	ID=FBpp0075440;	name=Mgat4a-PA;	parent=FBgn0036446,FBtr0075690;
FBpp0305258	GT54	2e-127	424.7	1	2.7e-127	424.2	1	ID=FBpp0305258;	name=Mgat4a-PB;	parent=FBgn0036446,FBtr0333044;
FBpp0075451	GT54	3.9e-112	374.5	0.3	5.3e-112	374	0.3	ID=FBpp0075451;	name=Magt4b-PA;	parent=FBgn0036447,FBtr0075701;
FBpp0070931	GT57	3.3e-160	535	29.4	3.9e-160	534.8	29.4	ID=FBpp0070931;	name=xit-PA;	parent=FBgn0029906,FBtr0070970;
FBpp0079595	GT57	1.7e-135	453.5	22.5	2.1e-135	453.2	22.5	ID=FBpp0079595;	name=gny-PA;	parent=FBgn0032234,FBtr0080005;
FBpp0304502	GT57	1.7e-135	453.5	22.5	2.1e-135	453.2	22.5	ID=FBpp0304502;	name=gny-PB;	parent=FBgn0032234,FBtr0332193;
FBpp0072004	GT58	2.8e-146	488.4	11.3	5.3e-146	487.5	11.3	ID=FBpp0072004;	name=Alg3-PA;	parent=FBgn0011297,FBtr0072095;
FBpp0075946	GT59	7.1e-112	375.4	13.9	9e-112	375.1	13.9	ID=FBpp0075946;	name=Alg10-PA;	parent=FBgn0052076,FBtr0076217;
FBpp0086042	GT5	6.3e-11	42.4	0.1	1.7e-08	34.4	0	ID=FBpp0086042;	name=PIG-A-PA;	parent=FBgn0034270,FBtr0086882;
FBpp0309242	GT5	6.3e-11	42.4	0.1	1.7e-08	34.4	0	ID=FBpp0309242;	name=PIG-A-PB;	parent=FBgn0034270,FBtr0340278;
FBpp0082494	GT5	6e-09	35.8	0.1	1.1e-06	28.4	0.1	ID=FBpp0082494;	name=GlyS-PC;	parent=FBgn0266064,FBtr0083035;
FBpp0082495	GT5	6e-09	35.8	0.1	1.1e-06	28.4	0.1	ID=FBpp0082495;	name=GlyS-PB;	parent=FBgn0266064,FBtr0083036;
FBpp0305474	GT5	6e-09	35.8	0.1	1.1e-06	28.4	0.1	ID=FBpp0305474;	name=GlyS-PD;	parent=FBgn0266064,FBtr0333276;
FBpp0082496	GT5	6.6e-09	35.7	0.1	1.1e-06	28.3	0.1	ID=FBpp0082496;	name=GlyS-PA;	parent=FBgn0266064,FBtr0083037;
FBpp0072887	GT5	3.2e-08	33.4	0	5.4e-07	29.4	0	ID=FBpp0072887;	name=Alg2-PA;	parent=FBgn0035401,FBtr0073023;
FBpp0078076	GT5	1.1e-06	28.4	0	3.2e-06	26.9	0	ID=FBpp0078076;	name=Alg11-PA;	parent=FBgn0037108,FBtr0078422;
FBpp0305584	GT5	1.1e-06	28.4	0	3.2e-06	26.9	0	ID=FBpp0305584;	name=Alg11-PB;	parent=FBgn0037108,FBtr0333392;
FBpp0077447	GT61	1.9e-47	162.5	0	2.9e-47	161.9	0	ID=FBpp0077447;	name=Eogt-PA;	parent=FBgn0264672,FBtr0077767;
FBpp0303533	GT61	1.9e-47	162.5	0	2.9e-47	161.9	0	ID=FBpp0303533;	name=Eogt-PB;	parent=FBgn0264672,FBtr0330685;
FBpp0078732	GT62	8.2e-07	29.4	0.1	0.0049	17	0	ID=FBpp0078732;	name=CG31915-PA;	parent=FBgn0051915,FBtr0079099;
FBpp0085763	GT64	1.3e-97	326.5	0	1.9e-97	325.9	0	ID=FBpp0085763;	name=botv-PA;	parent=FBgn0027535,FBtr0086579;
FBpp0099953	GT64	2.4e-97	325.7	0.4	3.9e-97	324.9	0.4	ID=FBpp0099953;	name=sotv-PB;	parent=FBgn0029175,FBtr0100513;
FBpp0305368	GT64	4.5e-92	308.4	0	5e-92	308.2	0	ID=FBpp0305368;	name=ttv-PC;	parent=FBgn0265974,FBtr0333165;
FBpp0086624	GT64	1.1e-91	307.1	0	6.5e-91	304.6	0	ID=FBpp0086624;	name=ttv-PA;	parent=FBgn0265974,FBtr0087495;
FBpp0305367	GT64	1.1e-91	307.1	0	6.5e-91	304.6	0	ID=FBpp0305367;	name=ttv-PB;	parent=FBgn0265974,FBtr0333164;
FBpp0423167	GT64	1.2e-91	307	0	6.7e-91	304.5	0	ID=FBpp0423167;	name=ttv-PD;	parent=FBgn0265974,FBtr0474168;
FBpp0086649	GT65	2.6e-151	504.7	0	3e-151	504.5	0	ID=FBpp0086649;	name=O-fut1-PA;	parent=FBgn0033901,FBtr0087520;
FBpp0308981	GT65	2.6e-151	504.7	0	3e-151	504.5	0	ID=FBpp0308981;	name=O-fut1-PB;	parent=FBgn0033901,FBtr0339959;
FBpp0070283	GT65	1.8e-08	35.1	0	0.0018	18.7	0	ID=FBpp0070283;	name=O-fut2-PA;	parent=FBgn0027791,FBtr0070296;
FBpp0084161	GT66	7.3e-192	640.1	32.6	9.4e-192	639.8	32.6	ID=FBpp0084161;	name=Stt3B-PA;	parent=FBgn0011336,FBtr0084786;
FBpp0076956	GT66	1.7e-191	638.9	31.2	2.1e-191	638.6	31.2	ID=FBpp0076956;	name=Stt3A-PA;	parent=FBgn0031149,FBtr0077264;
FBpp0311838	GT66	1.7e-191	638.9	31.2	2.1e-191	638.6	31.2	ID=FBpp0311838;	name=Stt3A-PC;	parent=FBgn0031149,FBtr0345923;
FBpp0079197	GT67	2.1e-08	34	0.8	1.5e-07	31.2	0.8	ID=FBpp0079197;	name=CG8673-PA;	parent=FBgn0031986,FBtr0079575;
FBpp0079198	GT67	1.2e-07	31.5	1.5	4e-07	29.8	1.5	ID=FBpp0079198;	name=CG8668-PA;	parent=FBgn0031988,FBtr0079576;
FBpp0308728	GT67	1.2e-07	31.5	1.5	4e-07	29.8	1.5	ID=FBpp0308728;	name=CG8668-PB;	parent=FBgn0031988,FBtr0339671;
FBpp0070283	GT68	3.3e-120	402.6	0	3.9e-120	402.4	0	ID=FBpp0070283;	name=O-fut2-PA;	parent=FBgn0027791,FBtr0070296;
FBpp0086649	GT68	4.1e-17	63.5	0	9.7e-17	62.3	0	ID=FBpp0086649;	name=O-fut1-PA;	parent=FBgn0033901,FBtr0087520;
FBpp0308981	GT68	4.1e-17	63.5	0	9.7e-17	62.3	0	ID=FBpp0308981;	name=O-fut1-PB;	parent=FBgn0033901,FBtr0339959;
FBpp0308233	GT71	2.6e-06	28	0	4.6e-06	27.2	0	ID=FBpp0308233;	name=Gyg-PB;	parent=FBgn0265191,FBtr0339088;
FBpp0308237	GT71	2.6e-06	28	0	4.6e-06	27.2	0	ID=FBpp0308237;	name=Gyg-PH;	parent=FBgn0265191,FBtr0339092;
FBpp0308236	GT71	3.1e-06	27.8	0	5.3e-06	27	0	ID=FBpp0308236;	name=Gyg-PG;	parent=FBgn0265191,FBtr0339091;
FBpp0308217	GT76	1e-115	387.8	26.2	1.2e-115	387.6	26.2	ID=FBpp0308217;	name=PIG-V-PA;	parent=FBgn0265174,FBtr0339071;
FBpp0308218	GT76	1e-115	387.8	26.2	1.2e-115	387.6	26.2	ID=FBpp0308218;	name=PIG-V-PB;	parent=FBgn0265174,FBtr0339072;
FBpp0308219	GT76	1e-115	387.8	26.2	1.2e-115	387.6	26.2	ID=FBpp0308219;	name=PIG-V-PC;	parent=FBgn0265174,FBtr0339073;
FBpp0086668	GT7	3e-96	322.4	0	3.7e-96	322	0	ID=FBpp0086668;	name=beta4GalNAcTA-PA;	parent=FBgn0027538,FBtr0087539;
FBpp0084788	GT7	1e-84	284.5	0.1	1.3e-84	284.2	0.1	ID=FBpp0084788;	name=beta4GalNAcTB-PA;	parent=FBgn0039625,FBtr0085419;
FBpp0084130	GT7	3.8e-79	266.3	0.8	4.6e-79	266	0.8	ID=FBpp0084130;	name=beta4GalT7-PA;	parent=FBgn0039258,FBtr0084755;
FBpp0087424	GT7	3.6e-15	56.7	0.7	7.1e-14	52.5	0.2	ID=FBpp0087424;	name=Csgalnact-PA;	parent=FBgn0033500,FBtr0088335;
FBpp0308536	GT7	3.6e-15	56.7	0.7	7.1e-14	52.5	0.2	ID=FBpp0308536;	name=Csgalnact-PB;	parent=FBgn0033500,FBtr0339450;
FBpp0073880	GT7	2.4e-14	54.1	0.7	2.6e-13	50.7	0.7	ID=FBpp0073880;	name=Chsy-PC;	parent=FBgn0030662,FBtr0074064;
FBpp0309305	GT7	2.4e-14	54.1	0.7	2.6e-13	50.7	0.7	ID=FBpp0309305;	name=Chsy-PD;	parent=FBgn0030662,FBtr0340347;
FBpp0080817	GT81	2.3e-11	43.9	0	3.4e-11	43.3	0	ID=FBpp0080817;	name=Dpm1-PA;	parent=FBgn0032799,FBtr0081279;
FBpp0079234	GT81	2.9e-09	37	0	4.3e-09	36.5	0	ID=FBpp0079234;	name=wol-PA;	parent=FBgn0261020,FBtr0079614;
FBpp0308237	GT8	8.4e-49	167.3	0.2	1.2e-48	166.9	0.2	ID=FBpp0308237;	name=Gyg-PH;	parent=FBgn0265191,FBtr0339092;
FBpp0308233	GT8	8.4e-49	167.3	0.2	1.2e-48	166.9	0.2	ID=FBpp0308233;	name=Gyg-PB;	parent=FBgn0265191,FBtr0339088;
FBpp0308236	GT8	1e-48	167.1	0.2	1.4e-48	166.6	0.2	ID=FBpp0308236;	name=Gyg-PG;	parent=FBgn0265191,FBtr0339091;
FBpp0308235	GT8	2.1e-48	166	0.2	4.2e-48	165	0.2	ID=FBpp0308235;	name=Gyg-PD;	parent=FBgn0265191,FBtr0339090;
FBpp0308234	GT8	3.9e-48	165.1	0.2	7e-48	164.3	0.2	ID=FBpp0308234;	name=Gyg-PE;	parent=FBgn0265191,FBtr0339089;
FBpp0308238	GT8	4e-37	129	0.1	5.7e-37	128.6	0.1	ID=FBpp0308238;	name=Gyg-PI;	parent=FBgn0265191,FBtr0339093;
FBpp0112197	GT8	7e-34	118.4	0.4	9.8e-34	118	0.4	ID=FBpp0112197;	name=shams-PB;	parent=FBgn0039273,FBtr0113285;
FBpp0072071	GT8	2.1e-20	74.3	3.2	3.3e-20	73.6	3.2	ID=FBpp0072071;	name=Xxylt-PA;	parent=FBgn0034959,FBtr0072162;
FBpp0074831	GT8	2.4e-15	57.7	0.7	6.7e-15	56.2	0.6	ID=FBpp0074831;	name=Uggt-PA;	parent=FBgn0014075,FBtr0075064;
FBpp0301743	GT90	2.3e-76	257.5	3.3	2.7e-76	257.3	3.3	ID=FBpp0301743;	name=rumi-PB;	parent=FBgn0086253,FBtr0310040;
FBpp0083713	GT90	4.6e-76	256.5	3.3	6.1e-76	256.1	3.3	ID=FBpp0083713;	name=rumi-PA;	parent=FBgn0086253,FBtr0084320;
FBpp0308605	GT90	4.1e-69	233.7	0.5	5e-69	233.5	0.5	ID=FBpp0308605;	name=CG31139-PC;	parent=FBgn0051139,FBtr0339522;
FBpp0083714	GT90	8.4e-69	232.7	0.5	1.1e-68	232.4	0.5	ID=FBpp0083714;	name=CG31139-PA;	parent=FBgn0051139,FBtr0084321;
FBpp0291253	GT92	1.3e-115	386.4	0	1.3e-115	386.4	0	ID=FBpp0291253;	name=CG9395-PC;	parent=FBgn0032506,FBtr0302043;
FBpp0309568	GT92	1.3e-115	386.4	0	1.3e-115	386.4	0	ID=FBpp0309568;	name=CG9395-PD;	parent=FBgn0032506,FBtr0342641;
FBpp0303757	GT92	2.7e-68	231.3	4.6	4.1e-68	230.7	4.6	ID=FBpp0303757;	name=CG3655-PC;	parent=FBgn0040397,FBtr0331339;
FBpp0070174	GT92	2.8e-68	231.2	4.9	4.3e-68	230.6	4.9	ID=FBpp0070174;	name=CG3655-PA;	parent=FBgn0040397,FBtr0070181;
FBpp0112239	GT92	2.8e-68	231.2	4.9	4.3e-68	230.6	4.9	ID=FBpp0112239;	name=CG3655-PB;	parent=FBgn0040397,FBtr0113327;
FBpp0303758	GT92	2.8e-68	231.2	4.9	4.3e-68	230.6	4.9	ID=FBpp0303758;	name=CG3655-PD;	parent=FBgn0040397,FBtr0331340;
FBpp0301826	GT92	4.1e-68	230.6	4.8	6.1e-68	230.1	4.8	ID=FBpp0301826;	name=CG12910-PB;	parent=FBgn0033502,FBtr0310141;
FBpp0087426	GT92	4.1e-68	230.6	4.8	6.1e-68	230.1	4.8	ID=FBpp0087426;	name=CG12910-PA;	parent=FBgn0033502,FBtr0088337;
FBpp0301827	GT92	4.1e-68	230.6	4.8	6.1e-68	230.1	4.8	ID=FBpp0301827;	name=CG12910-PC;	parent=FBgn0033502,FBtr0310142;
FBpp0070241	GT92	2.8e-41	142.6	0.8	3.9e-41	142.1	0.8	ID=FBpp0070241;	name=CG11384-PA;	parent=FBgn0040363,FBtr0070251;
FBpp0073581	GT92	1.5e-36	127.1	0.6	2.1e-36	126.7	0.6	ID=FBpp0073581;	name=CG12715-PA;	parent=FBgn0030443,FBtr0073750;
FBpp0310198	GT92	1.5e-36	127.1	0.6	2.1e-36	126.7	0.6	ID=FBpp0310198;	name=CG12715-PB;	parent=FBgn0030443,FBtr0343602;
FBpp0074240	AA1	1.1e-227	759.5	7.7	1.2e-227	759.3	7.7	ID=FBpp0074240;	name=Mco4-PA;	parent=FBgn0052557,FBtr0074466;
FBpp0290285	AA1	3.2e-115	387.2	5.1	1.6e-114	384.9	5.1	ID=FBpp0290285;	name=stw-PF;	parent=FBgn0286203,FBtr0301063;
FBpp0289196	AA1	3.2e-115	387.2	4.9	1.6e-114	384.9	4.9	ID=FBpp0289196;	name=stw-PA;	parent=FBgn0286203,FBtr0299918;
FBpp0289199	AA1	6.5e-115	386.2	4.5	3.6e-114	383.7	4.5	ID=FBpp0289199;	name=stw-PE;	parent=FBgn0286203,FBtr0299921;
FBpp0307245	AA1	8.3e-115	385.8	4.7	5.7e-114	383.1	4.7	ID=FBpp0307245;	name=stw-PG;	parent=FBgn0286203,FBtr0335262;
FBpp0289198	AA1	1.5e-114	385	5.8	1.6e-113	381.6	5.8	ID=FBpp0289198;	name=stw-PD;	parent=FBgn0286203,FBtr0299920;
FBpp0084314	AA1	9.9e-103	345.9	0.9	1.2e-102	345.6	0.9	ID=FBpp0084314;	name=Mco3-PA;	parent=FBgn0039387,FBtr0084940;
FBpp0079407	AA1	1.6e-97	328.6	9.9	1.3e-72	246.1	2	ID=FBpp0079407;	name=Mco1-PA;	parent=FBgn0032116,FBtr0079807;
FBpp0292899	AA1	1.6e-97	328.6	9.9	1.3e-72	246.1	2	ID=FBpp0292899;	name=Mco1-PB;	parent=FBgn0032116,FBtr0303896;
FBpp0292900	AA1	1.6e-97	328.6	9.9	1.3e-72	246.1	2	ID=FBpp0292900;	name=Mco1-PC;	parent=FBgn0032116,FBtr0303897;
FBpp0073800	AA3	5.1e-107	359.6	0	6.6e-107	359.2	0	ID=FBpp0073800;	name=CG9518-PA;	parent=FBgn0030590,FBtr0073983;
FBpp0310195	AA3	5.1e-107	359.6	0	6.6e-107	359.2	0	ID=FBpp0310195;	name=CG9518-PB;	parent=FBgn0030590,FBtr0343598;
FBpp0310587	AA3	5.1e-107	359.6	0	6.6e-107	359.2	0	ID=FBpp0310587;	name=CG9518-PC;	parent=FBgn0030590,FBtr0344175;
FBpp0073802	AA3	1.4e-105	354.8	0	1.9e-105	354.4	0	ID=FBpp0073802;	name=CG9521-PA;	parent=FBgn0030588,FBtr0073985;
FBpp0310796	AA3	6.7e-105	352.5	0	8.9e-105	352.1	0	ID=FBpp0310796;	name=CG45065-PA;	parent=FBgn0266435,FBtr0344424;
FBpp0073793	AA3	9.7e-105	352	0	1.3e-104	351.6	0	ID=FBpp0073793;	name=CG12398-PA;	parent=FBgn0030596,FBtr0073976;
FBpp0073801	AA3	3.2e-103	347	0	4.1e-103	346.7	0	ID=FBpp0073801;	name=CG9519-PA;	parent=FBgn0030589,FBtr0073984;
FBpp0073797	AA3	3.1e-102	343.7	0	4.3e-102	343.3	0	ID=FBpp0073797;	name=CG9514-PA;	parent=FBgn0030592,FBtr0073980;
FBpp0073796	AA3	1.5e-100	338.2	0	1.8e-100	338	0	ID=FBpp0073796;	name=CG9512-PA;	parent=FBgn0030593,FBtr0073979;
FBpp0310036	AA3	1.5e-100	338.2	0	1.8e-100	338	0	ID=FBpp0310036;	name=CG9512-PB;	parent=FBgn0030593,FBtr0343381;
FBpp0084360	AA3	5.1e-100	336.4	0	6.8e-100	336	0	ID=FBpp0084360;	name=CG6142-PA;	parent=FBgn0039415,FBtr0084987;
FBpp0073791	AA3	4.6e-99	333.3	0	6.1e-99	332.9	0	ID=FBpp0073791;	name=CG9503-PA;	parent=FBgn0030598,FBtr0073974;
FBpp0422604	AA3	9.8e-99	332.2	0	1.3e-98	331.8	0	ID=FBpp0422604;	name=Gld-PB;	parent=FBgn0001112,FBtr0472596;
FBpp0081114	AA3	1.5e-98	331.5	0	2e-98	331.1	0	ID=FBpp0081114;	name=Gld-PA;	parent=FBgn0001112,FBtr0081596;
FBpp0073803	AA3	7.7e-95	319.3	0	1e-94	318.9	0	ID=FBpp0073803;	name=CG9522-PA;	parent=FBgn0030587,FBtr0073986;
FBpp0073804	AA3	8.6e-95	319.2	0	1.1e-94	318.9	0	ID=FBpp0073804;	name=CG12539-PA;	parent=FBgn0030586,FBtr0073987;
FBpp0073795	AA3	4.5e-94	316.8	0	6e-94	316.4	0	ID=FBpp0073795;	name=fiz-PA;	parent=FBgn0030594,FBtr0073978;
FBpp0310035	AA3	4.5e-94	316.8	0	6e-94	316.4	0	ID=FBpp0310035;	name=fiz-PB;	parent=FBgn0030594,FBtr0343380;
FBpp0073792	AA3	5.7e-82	276.8	0	7.6e-82	276.4	0	ID=FBpp0073792;	name=Eo-PA;	parent=FBgn0030597,FBtr0073975;
FBpp0081880	AA3	7.7e-75	253.3	0	9.9e-75	252.9	0	ID=FBpp0081880;	name=ninaG-PA;	parent=FBgn0037896,FBtr0082404;
FBpp0290369	AA3	9.3e-66	223.3	0	1.2e-65	222.9	0	ID=FBpp0290369;	name=ninaG-PB;	parent=FBgn0037896,FBtr0301146;
FBpp0078759	AA3	5.9e-07	29	0	7.4e-07	28.7	0	ID=FBpp0078759;	name=Coq6-PA;	parent=FBgn0031713,FBtr0079128;
FBpp0070365	AA4	5.4e-19	69	0.4	4.6e-17	62.6	0.1	ID=FBpp0070365;	name=D2hgdh-PB;	parent=FBgn0023507,FBtr0070381;
FBpp0070366	AA4	5.4e-19	69	0.4	4.6e-17	62.6	0.1	ID=FBpp0070366;	name=D2hgdh-PC;	parent=FBgn0023507,FBtr0070382;
FBpp0070367	AA4	5.4e-19	69	0.4	4.6e-17	62.6	0.1	ID=FBpp0070367;	name=D2hgdh-PA;	parent=FBgn0023507,FBtr0070383;
FBpp0086558	AA4	3.7e-10	39.9	0	2e-09	37.4	0	ID=FBpp0086558;	name=ADPS-PA;	parent=FBgn0033983,FBtr0087428;
FBpp0292772	AA4	3.7e-10	39.9	0	2e-09	37.4	0	ID=FBpp0292772;	name=ADPS-PB;	parent=FBgn0033983,FBtr0303760;
FBpp0292773	AA4	3.7e-10	39.9	0	2e-09	37.4	0	ID=FBpp0292773;	name=ADPS-PC;	parent=FBgn0033983,FBtr0303761;
FBpp0292774	AA4	3.7e-10	39.9	0	2e-09	37.4	0	ID=FBpp0292774;	name=ADPS-PD;	parent=FBgn0033983,FBtr0303762;
FBpp0075260	AA5	1.5e-23	83.2	3.4	2.1e-10	39.7	0.1	ID=FBpp0075260;	name=dbo-PA;	parent=FBgn0040230,FBtr0075505;
FBpp0304443	AA5	1.6e-23	83.1	3.7	2e-10	39.7	0.1	ID=FBpp0304443;	name=dbo-PB;	parent=FBgn0040230,FBtr0332133;
FBpp0082030	AA5	8.9e-23	80.6	5.2	1.9e-07	29.9	0.1	ID=FBpp0082030;	name=KLHL18-PB;	parent=FBgn0037978,FBtr0082557;
FBpp0082029	AA5	1.2e-22	80.2	5.2	2.1e-07	29.7	0.1	ID=FBpp0082029;	name=KLHL18-PA;	parent=FBgn0037978,FBtr0082556;
FBpp0307415	AA5	1.2e-22	80.2	5.2	2.1e-07	29.7	0.1	ID=FBpp0307415;	name=KLHL18-PC;	parent=FBgn0037978,FBtr0335434;
FBpp0309114	AA5	1.1e-20	73.8	3.3	4.5e-11	41.9	0.8	ID=FBpp0309114;	name=CG17754-PE;	parent=FBgn0030114,FBtr0340121;
FBpp0071250	AA5	2.1e-20	72.8	3.4	5.6e-11	41.6	0.9	ID=FBpp0071250;	name=CG17754-PD;	parent=FBgn0030114,FBtr0071315;
FBpp0309115	AA5	2.1e-20	72.8	3.4	5.6e-11	41.6	0.9	ID=FBpp0309115;	name=CG17754-PF;	parent=FBgn0030114,FBtr0340122;
FBpp0309116	AA5	2.5e-20	72.5	3.4	5.5e-11	41.6	0.8	ID=FBpp0309116;	name=CG17754-PG;	parent=FBgn0030114,FBtr0340123;
FBpp0071249	AA5	2.5e-20	72.5	3.4	5.5e-11	41.6	0.8	ID=FBpp0071249;	name=CG17754-PC;	parent=FBgn0030114,FBtr0071314;
FBpp0071251	AA5	2.5e-20	72.5	3.4	5.5e-11	41.6	0.8	ID=FBpp0071251;	name=CG17754-PA;	parent=FBgn0030114,FBtr0071316;
FBpp0080595	AA5	1.3e-19	70.2	8.3	1.9e-08	33.2	0.6	ID=FBpp0080595;	name=kel-PA;	parent=FBgn0001301,FBtr0081042;
FBpp0112408	AA5	1.1e-17	63.8	0.6	1.5e-08	33.6	0.1	ID=FBpp0112408;	name=klhl10-PA;	parent=FBgn0040038,FBtr0113685;
FBpp0112409	AA5	1.1e-17	63.8	0.6	1.5e-08	33.6	0.1	ID=FBpp0112409;	name=klhl10-PB;	parent=FBgn0040038,FBtr0113686;
FBpp0080063	AA5	4.5e-16	58.4	0	5.3e-10	38.3	0.1	ID=FBpp0080063;	name=CG9426-PA;	parent=FBgn0032485,FBtr0080484;
FBpp0085812	AA5	1.7e-15	56.5	5.2	1.9e-13	49.7	0.5	ID=FBpp0085812;	name=CG15097-PA;	parent=FBgn0034396,FBtr0086630;
FBpp0082863	AA5	1.1e-14	53.8	2.5	4.8e-13	48.4	2.5	ID=FBpp0082863;	name=Keap1-PA;	parent=FBgn0038475,FBtr0083422;
FBpp0082865	AA5	1.1e-14	53.8	2.5	4.8e-13	48.4	2.5	ID=FBpp0082865;	name=Keap1-PC;	parent=FBgn0038475,FBtr0083424;
FBpp0082864	AA5	1.2e-14	53.7	2.5	5.2e-13	48.3	2.5	ID=FBpp0082864;	name=Keap1-PB;	parent=FBgn0038475,FBtr0083423;
FBpp0292329	AA5	1.4e-14	53.5	7.4	3.8e-13	48.7	1.4	ID=FBpp0292329;	name=CG15097-PC;	parent=FBgn0034396,FBtr0303237;
FBpp0072782	AA5	4.4e-14	51.8	5.3	6.2e-14	51.3	5.3	ID=FBpp0072782;	name=oxt-PB;	parent=FBgn0015360,FBtr0072904;
FBpp0084049	AA5	1.8e-08	33.3	2.5	2.6e-08	32.7	2.5	ID=FBpp0084049;	name=Wsck-PA;	parent=FBgn0046685,FBtr0084669;
FBpp0077004	AA5	1.2e-07	30.5	0.1	1.7e-07	30	0.1	ID=FBpp0077004;	name=CG1812-PA;	parent=FBgn0031119,FBtr0077312;
FBpp0086558	AA7	3.3e-13	50.9	0	4.1e-11	44	0	ID=FBpp0086558;	name=ADPS-PA;	parent=FBgn0033983,FBtr0087428;
FBpp0292772	AA7	3.3e-13	50.9	0	4.1e-11	44	0	ID=FBpp0292772;	name=ADPS-PB;	parent=FBgn0033983,FBtr0303760;
FBpp0292773	AA7	3.3e-13	50.9	0	4.1e-11	44	0	ID=FBpp0292773;	name=ADPS-PC;	parent=FBgn0033983,FBtr0303761;
FBpp0292774	AA7	3.3e-13	50.9	0	4.1e-11	44	0	ID=FBpp0292774;	name=ADPS-PD;	parent=FBgn0033983,FBtr0303762;
FBpp0070365	AA7	1e-10	42.7	0.2	1.5e-10	42.1	0.2	ID=FBpp0070365;	name=D2hgdh-PB;	parent=FBgn0023507,FBtr0070381;
FBpp0070366	AA7	1e-10	42.7	0.2	1.5e-10	42.1	0.2	ID=FBpp0070366;	name=D2hgdh-PC;	parent=FBgn0023507,FBtr0070382;
FBpp0070367	AA7	1e-10	42.7	0.2	1.5e-10	42.1	0.2	ID=FBpp0070367;	name=D2hgdh-PA;	parent=FBgn0023507,FBtr0070383;
FBpp0073792	AA8	1.7e-51	175.9	0	2.8e-36	125.6	0.2	ID=FBpp0073792;	name=Eo-PA;	parent=FBgn0030597,FBtr0073975;
FBpp0084360	AA8	9e-46	157	0	2.8e-30	105.8	0	ID=FBpp0084360;	name=CG6142-PA;	parent=FBgn0039415,FBtr0084987;
FBpp0073800	AA8	3.6e-42	145.1	0	4.5e-28	98.5	0	ID=FBpp0073800;	name=CG9518-PA;	parent=FBgn0030590,FBtr0073983;
FBpp0310195	AA8	3.6e-42	145.1	0	4.5e-28	98.5	0	ID=FBpp0310195;	name=CG9518-PB;	parent=FBgn0030590,FBtr0343598;
FBpp0310587	AA8	3.6e-42	145.1	0	4.5e-28	98.5	0	ID=FBpp0310587;	name=CG9518-PC;	parent=FBgn0030590,FBtr0344175;
FBpp0073795	AA8	8.3e-42	143.9	0	3.8e-41	141.7	0	ID=FBpp0073795;	name=fiz-PA;	parent=FBgn0030594,FBtr0073978;
FBpp0310035	AA8	8.3e-42	143.9	0	3.8e-41	141.7	0	ID=FBpp0310035;	name=fiz-PB;	parent=FBgn0030594,FBtr0343380;
FBpp0310796	AA8	2.4e-40	139.1	0.1	1.1e-27	97.2	0	ID=FBpp0310796;	name=CG45065-PA;	parent=FBgn0266435,FBtr0344424;
FBpp0073797	AA8	4e-40	138.3	0	1e-25	90.7	0	ID=FBpp0073797;	name=CG9514-PA;	parent=FBgn0030592,FBtr0073980;
FBpp0081114	AA8	6.7e-39	134.3	1.7	1.4e-36	126.6	1.7	ID=FBpp0081114;	name=Gld-PA;	parent=FBgn0001112,FBtr0081596;
FBpp0422604	AA8	6.8e-39	134.3	1.7	1.4e-36	126.7	1.7	ID=FBpp0422604;	name=Gld-PB;	parent=FBgn0001112,FBtr0472596;
FBpp0073802	AA8	4.7e-38	131.5	0.2	1.8e-21	76.6	0.7	ID=FBpp0073802;	name=CG9521-PA;	parent=FBgn0030588,FBtr0073985;
FBpp0073801	AA8	3.7e-37	128.5	0	4e-20	72.2	0.1	ID=FBpp0073801;	name=CG9519-PA;	parent=FBgn0030589,FBtr0073984;
FBpp0073796	AA8	1.5e-36	126.5	4.2	8.1e-35	120.8	4.2	ID=FBpp0073796;	name=CG9512-PA;	parent=FBgn0030593,FBtr0073979;
FBpp0310036	AA8	1.5e-36	126.5	4.2	8.1e-35	120.8	4.2	ID=FBpp0310036;	name=CG9512-PB;	parent=FBgn0030593,FBtr0343381;
FBpp0073793	AA8	5.8e-36	124.6	0	2e-16	59.9	0	ID=FBpp0073793;	name=CG12398-PA;	parent=FBgn0030596,FBtr0073976;
FBpp0073791	AA8	2e-35	122.8	0.1	5.6e-21	75	0.1	ID=FBpp0073791;	name=CG9503-PA;	parent=FBgn0030598,FBtr0073974;
FBpp0073803	AA8	8.4e-34	117.4	0	8.4e-23	81	0.1	ID=FBpp0073803;	name=CG9522-PA;	parent=FBgn0030587,FBtr0073986;
FBpp0073804	AA8	6.6e-33	114.5	0	1.3e-22	80.4	0	ID=FBpp0073804;	name=CG12539-PA;	parent=FBgn0030586,FBtr0073987;
FBpp0081880	AA8	6.3e-28	98	0	4.9e-11	42.1	0	ID=FBpp0081880;	name=ninaG-PA;	parent=FBgn0037896,FBtr0082404;
FBpp0290369	AA8	1.2e-19	70.6	0.2	8.6e-08	31.4	0	ID=FBpp0290369;	name=ninaG-PB;	parent=FBgn0037896,FBtr0301146;
FBpp0306678	CBM66	2.9e-08	35	0.9	0.26	12.4	0.1	ID=FBpp0306678;	name=Nrx-1-PG;	parent=FBgn0038975,FBtr0334611;
FBpp0306676	CBM66	8.1e-08	33.5	1.1	0.32	12.1	0.1	ID=FBpp0306676;	name=Nrx-1-PE;	parent=FBgn0038975,FBtr0334609;
FBpp0290700	CBM66	8.4e-08	33.4	1.1	0.33	12	0.1	ID=FBpp0290700;	name=Nrx-1-PB;	parent=FBgn0038975,FBtr0301485;
FBpp0306675	CBM66	8.4e-08	33.4	1.1	0.33	12	0.1	ID=FBpp0306675;	name=Nrx-1-PD;	parent=FBgn0038975,FBtr0334608;
FBpp0306679	CBM66	8.4e-08	33.4	1.1	0.33	12	0.1	ID=FBpp0306679;	name=Nrx-1-PH;	parent=FBgn0038975,FBtr0334612;
FBpp0311420	CBM66	8.4e-08	33.4	1.1	0.33	12	0.1	ID=FBpp0311420;	name=Nrx-1-PI;	parent=FBgn0038975,FBtr0345228;
FBpp0306677	CBM66	8.8e-08	33.4	1.1	0.33	12	0.1	ID=FBpp0306677;	name=Nrx-1-PF;	parent=FBgn0038975,FBtr0334610;
FBpp0083649	CBM66	1e-07	33.2	1.4	0.33	12	0.1	ID=FBpp0083649;	name=Nrx-1-PA;	parent=FBgn0038975,FBtr0084256;
FBpp0306674	CBM66	1e-07	33.2	1.4	0.33	12	0.1	ID=FBpp0306674;	name=Nrx-1-PC;	parent=FBgn0038975,FBtr0334607;
FBpp0071525	GH133	8.1e-143	476.6	0	1.2e-142	476	0	ID=FBpp0071525;	name=CG9485-PA;	parent=FBgn0034618,FBtr0071599;
FBpp0289624	GH133	8.1e-143	476.6	0	1.2e-142	476	0	ID=FBpp0289624;	name=CG9485-PE;	parent=FBgn0034618,FBtr0300395;
FBpp0302010	GH133	8.1e-143	476.6	0	1.2e-142	476	0	ID=FBpp0302010;	name=CG9485-PF;	parent=FBgn0034618,FBtr0310327;
FBpp0071527	GH133	8.1e-143	476.6	0	1.2e-142	476	0	ID=FBpp0071527;	name=CG9485-PC;	parent=FBgn0034618,FBtr0071601;
FBpp0289623	GH133	8.3e-143	476.5	0	1.2e-142	476	0	ID=FBpp0289623;	name=CG9485-PD;	parent=FBgn0034618,FBtr0300394;
FBpp0071526	GH133	9e-143	476.4	0	1.3e-142	475.9	0	ID=FBpp0071526;	name=CG9485-PB;	parent=FBgn0034618,FBtr0071600;
FBpp0074383	GT98	2.2e-96	324.3	39.3	5.8e-94	316.3	39.3	ID=FBpp0074383;	name=CG6659-PA;	parent=FBgn0030946,FBtr0074612;
FBpp0074384	GT98	1e-76	259.4	29.9	1e-75	256	29.9	ID=FBpp0074384;	name=CG6659-PB;	parent=FBgn0030946,FBtr0074613;
FBpp0071467	GH142	4.7e-07	29.5	0.3	1e-06	28.4	0.1	ID=FBpp0071467;	name=Treh-PB;	parent=FBgn0003748,FBtr0071538;
FBpp0071464	GH142	5.5e-07	29.3	0.3	1.2e-06	28.2	0.1	ID=FBpp0071464;	name=Treh-PE;	parent=FBgn0003748,FBtr0071535;
FBpp0071465	GH142	5.5e-07	29.3	0.3	1.2e-06	28.2	0.1	ID=FBpp0071465;	name=Treh-PD;	parent=FBgn0003748,FBtr0071536;
FBpp0071466	GH142	5.5e-07	29.3	0.3	1.2e-06	28.2	0.1	ID=FBpp0071466;	name=Treh-PA;	parent=FBgn0003748,FBtr0071537;
FBpp0304696	GH142	5.5e-07	29.3	0.3	1.2e-06	28.2	0.1	ID=FBpp0304696;	name=Treh-PG;	parent=FBgn0003748,FBtr0332423;
FBpp0071468	GH142	6.3e-07	29.1	0.4	1.3e-06	28	0.1	ID=FBpp0071468;	name=Treh-PC;	parent=FBgn0003748,FBtr0071539;
FBpp0071469	GH142	6.3e-07	29.1	0.4	1.3e-06	28	0.1	ID=FBpp0071469;	name=Treh-PF;	parent=FBgn0003748,FBtr0071540;
FBpp0292370	AA15	8.5e-66	222.2	3.5	1.1e-65	221.9	3.5	ID=FBpp0292370;	name=CG42749-PB;	parent=FBgn0261803,FBtr0303278;
FBpp0292371	AA15	1.3e-65	221.6	3.5	1.8e-65	221.1	3.5	ID=FBpp0292371;	name=CG42749-PC;	parent=FBgn0261803,FBtr0303279;
FBpp0309415	AA15	1.3e-65	221.6	3.5	1.8e-65	221.1	3.5	ID=FBpp0309415;	name=CG42749-PD;	parent=FBgn0261803,FBtr0340474;
FBpp0083308	AA15	6e-61	206.4	0.3	6.9e-61	206.2	0.3	ID=FBpp0083308;	name=CG4362-PA;	parent=FBgn0038784,FBtr0083900;
FBpp0423078	AA15	3.9e-60	203.8	1.5	4.4e-60	203.6	1.5	ID=FBpp0423078;	name=CG4367-PC;	parent=FBgn0038783,FBtr0473615;
FBpp0423079	AA15	3.9e-60	203.8	1.5	4.4e-60	203.6	1.5	ID=FBpp0423079;	name=CG4367-PD;	parent=FBgn0038783,FBtr0473616;
FBpp0310230	AA15	3.5e-59	200.6	0.6	3.5e-59	200.6	0.6	ID=FBpp0310230;	name=CG42598-PB;	parent=FBgn0260997,FBtr0343637;
FBpp0310231	AA15	1.3e-58	198.8	0.6	1.3e-58	198.8	0.6	ID=FBpp0310231;	name=CG41284-PC;	parent=FBgn0085599,FBtr0343638;
FBpp0311447	GH150	8.1e-06	25	0.1	0.00016	20.8	0.1	ID=FBpp0311447;	name=CG6184-PE;	parent=FBgn0038725,FBtr0345270;
FBpp0083211	GH150	8.5e-06	25	0.1	0.00016	20.8	0.1	ID=FBpp0083211;	name=CG6184-PA;	parent=FBgn0038725,FBtr0083801;
FBpp0311448	GH150	9.5e-06	24.8	0.1	0.00017	20.7	0.1	ID=FBpp0311448;	name=CG6184-PF;	parent=FBgn0038725,FBtr0345271;
FBpp0082545	GT105	3e-31	107.8	0.2	8.7e-31	106.3	0.2	ID=FBpp0082545;	name=CG5038-PA;	parent=FBgn0038324,FBtr0083089;
FBpp0077614	GT105	8.9e-29	99.9	3.2	3.3e-28	98	0.7	ID=FBpp0077614;	name=CG4341-PA;	parent=FBgn0028481,FBtr0077949;
FBpp0290896	GT105	1.3e-28	99.3	0.1	7.7e-28	96.9	0.1	ID=FBpp0290896;	name=CG31690-PE;	parent=FBgn0051690,FBtr0301682;
FBpp0293601	GT105	2e-28	98.8	3.8	3.2e-28	98.1	0.7	ID=FBpp0293601;	name=CG4341-PC;	parent=FBgn0028481,FBtr0305064;
FBpp0071560	GT105	1.1e-27	96.4	2.2	2.3e-27	95.3	1	ID=FBpp0071560;	name=Tmtc3-PA;	parent=FBgn0020312,FBtr0071637;
FBpp0071561	GT105	1.1e-27	96.4	2.2	2.3e-27	95.3	1	ID=FBpp0071561;	name=Tmtc3-PB;	parent=FBgn0020312,FBtr0071638;
FBpp0309400	GH157	7.2e-08	32.2	0.6	5.7e-07	29.2	0	ID=FBpp0309400;	name=CG15117-PE;	parent=FBgn0034417,FBtr0340458;
FBpp0309401	GH157	7.2e-08	32.2	0.6	5.7e-07	29.2	0	ID=FBpp0309401;	name=CG15117-PF;	parent=FBgn0034417,FBtr0340459;
FBpp0309399	GH157	8.1e-08	32	0.6	6.2e-07	29.1	0	ID=FBpp0309399;	name=CG15117-PD;	parent=FBgn0034417,FBtr0340457;
FBpp0099475	GH157	8.4e-08	31.9	0.6	6.3e-07	29	0	ID=FBpp0099475;	name=CG15117-PC;	parent=FBgn0034417,FBtr0100129;
FBpp0085777	GH157	8.4e-08	31.9	0.6	6.3e-07	29	0	ID=FBpp0085777;	name=CG15117-PA;	parent=FBgn0034417,FBtr0086593;
FBpp0085778	GH157	9e-08	31.8	0.6	6.6e-07	29	0	ID=FBpp0085778;	name=CG15117-PB;	parent=FBgn0034417,FBtr0086594;
FBpp0085217	GH157	2.5e-06	27.1	0	3.6e-06	26.6	0	ID=FBpp0085217;	name=betaGlu-PA;	parent=FBgn0270927,FBtr0085858;
FBpp0309400	GH158	1.5e-09	38.8	0	2.6e-09	37.9	0	ID=FBpp0309400;	name=CG15117-PE;	parent=FBgn0034417,FBtr0340458;
FBpp0309401	GH158	1.5e-09	38.8	0	2.6e-09	37.9	0	ID=FBpp0309401;	name=CG15117-PF;	parent=FBgn0034417,FBtr0340459;
FBpp0309399	GH158	1.6e-09	38.7	0	2.8e-09	37.9	0	ID=FBpp0309399;	name=CG15117-PD;	parent=FBgn0034417,FBtr0340457;
FBpp0085777	GH158	1.6e-09	38.6	0	2.9e-09	37.8	0	ID=FBpp0085777;	name=CG15117-PA;	parent=FBgn0034417,FBtr0086593;
FBpp0099475	GH158	1.6e-09	38.6	0	2.9e-09	37.8	0	ID=FBpp0099475;	name=CG15117-PC;	parent=FBgn0034417,FBtr0100129;
FBpp0085778	GH158	1.7e-09	38.6	0	3e-09	37.8	0	ID=FBpp0085778;	name=CG15117-PB;	parent=FBgn0034417,FBtr0086594;
FBpp0085217	GH158	3e-09	37.7	0	5.5e-09	36.9	0	ID=FBpp0085217;	name=betaGlu-PA;	parent=FBgn0270927,FBtr0085858;
FBpp0290640	GT2_Chitin_synth_2	3.9e-30	105.8	2.6	1.6e-24	87.2	0	ID=FBpp0290640;	name=kkv-PD;	parent=FBgn0001311,FBtr0301398;
FBpp0078442	GT2_Chitin_synth_2	3.9e-30	105.7	2.6	1.6e-24	87.2	0	ID=FBpp0078442;	name=kkv-PA;	parent=FBgn0001311,FBtr0078798;
FBpp0089164	GT2_Chitin_synth_2	3.9e-30	105.7	2.6	1.6e-24	87.2	0	ID=FBpp0089164;	name=kkv-PC;	parent=FBgn0001311,FBtr0078800;
FBpp0300424	GT2_Chitin_synth_2	3.2e-26	92.9	10.8	4.3e-24	85.8	3.7	ID=FBpp0300424;	name=Chs2-PC;	parent=FBgn0029091,FBtr0308081;
FBpp0306214	GT2_Chitin_synth_2	3.2e-26	92.9	10.8	4.3e-24	85.8	3.7	ID=FBpp0306214;	name=Chs2-PD;	parent=FBgn0029091,FBtr0334089;
FBpp0080817	GT2_Glycos_transf_2	3.5e-37	128.6	0	4.3e-37	128.3	0	ID=FBpp0080817;	name=Dpm1-PA;	parent=FBgn0032799,FBtr0081279;
FBpp0078663	GT2_Glycos_transf_2	5.2e-35	121.5	0	7.9e-35	120.9	0	ID=FBpp0078663;	name=Pgant5-PA;	parent=FBgn0031681,FBtr0079026;
FBpp0110323	GT2_Glycos_transf_2	5.2e-35	121.5	0	7.9e-35	120.9	0	ID=FBpp0110323;	name=Pgant5-PB;	parent=FBgn0031681,FBtr0111024;
FBpp0088130	GT2_Glycos_transf_2	8.2e-33	114.4	0	2e-32	113.1	0	ID=FBpp0088130;	name=Pgant3-PA;	parent=FBgn0027558,FBtr0089061;
FBpp0074395	GT2_Glycos_transf_2	1.1e-32	114	0	1.7e-32	113.4	0	ID=FBpp0074395;	name=Pgant7-PA;	parent=FBgn0030930,FBtr0074624;
FBpp0074396	GT2_Glycos_transf_2	1.1e-32	114	0	1.7e-32	113.4	0	ID=FBpp0074396;	name=Pgant7-PB;	parent=FBgn0030930,FBtr0074625;
FBpp0311917	GT2_Glycos_transf_2	1.1e-32	114	0	1.7e-32	113.4	0	ID=FBpp0311917;	name=Pgant7-PC;	parent=FBgn0030930,FBtr0346082;
FBpp0086258	GT2_Glycos_transf_2	1.1e-32	113.9	0	2e-32	113.1	0	ID=FBpp0086258;	name=Pgant9-PA;	parent=FBgn0050463,FBtr0087112;
FBpp0112292	GT2_Glycos_transf_2	1.1e-32	113.9	0	2e-32	113.1	0	ID=FBpp0112292;	name=Pgant9-PD;	parent=FBgn0050463,FBtr0113380;
FBpp0086259	GT2_Glycos_transf_2	1.1e-32	113.9	0	2e-32	113.1	0	ID=FBpp0086259;	name=Pgant9-PB;	parent=FBgn0050463,FBtr0087113;
FBpp0112291	GT2_Glycos_transf_2	1.1e-32	113.9	0	2e-32	113.1	0	ID=FBpp0112291;	name=Pgant9-PC;	parent=FBgn0050463,FBtr0113379;
FBpp0072842	GT2_Glycos_transf_2	2.8e-31	109.4	0	4.3e-31	108.8	0	ID=FBpp0072842;	name=Pgant6-PA;	parent=FBgn0035375,FBtr0072972;
FBpp0072843	GT2_Glycos_transf_2	2.8e-31	109.4	0	4.3e-31	108.8	0	ID=FBpp0072843;	name=Pgant6-PB;	parent=FBgn0035375,FBtr0072973;
FBpp0305633	GT2_Glycos_transf_2	2.8e-31	109.4	0	4.3e-31	108.8	0	ID=FBpp0305633;	name=Pgant6-PC;	parent=FBgn0035375,FBtr0333442;
FBpp0080202	GT2_Glycos_transf_2	1.5e-28	100.5	0	2.4e-28	99.8	0	ID=FBpp0080202;	name=Pgant35A-PA;	parent=FBgn0001970,FBtr0080629;
FBpp0099799	GT2_Glycos_transf_2	2.6e-28	99.7	0.1	4.4e-28	99	0.1	ID=FBpp0099799;	name=Pgant2-PA;	parent=FBgn0031530,FBtr0077592;
FBpp0292961	GT2_Glycos_transf_2	2.6e-28	99.7	0.1	4.4e-28	99	0.1	ID=FBpp0292961;	name=Pgant2-PB;	parent=FBgn0031530,FBtr0303992;
FBpp0086464	GT2_Glycos_transf_2	1.4e-27	97.4	0	4.4e-27	95.7	0	ID=FBpp0086464;	name=Pgant1-PA;	parent=FBgn0034025,FBtr0087331;
FBpp0086465	GT2_Glycos_transf_2	1.4e-27	97.4	0	4.4e-27	95.7	0	ID=FBpp0086465;	name=Pgant1-PB;	parent=FBgn0034025,FBtr0087332;
FBpp0113016	GT2_Glycos_transf_2	2.5e-26	93.2	0	4.2e-26	92.5	0	ID=FBpp0113016;	name=Pgant4-PB;	parent=FBgn0051956,FBtr0114524;
FBpp0305447	GT2_Glycos_transf_2	2.5e-26	93.2	0	4.2e-26	92.5	0	ID=FBpp0305447;	name=Pgant4-PC;	parent=FBgn0051956,FBtr0333248;
FBpp0084684	GT2_Glycos_transf_2	2.4e-24	86.8	0	4.2e-24	86	0	ID=FBpp0084684;	name=CG10000-PA;	parent=FBgn0039596,FBtr0085315;
FBpp0075331	GT2_Glycos_transf_2	2e-22	80.5	0	4.3e-22	79.5	0	ID=FBpp0075331;	name=Pgant8-PA;	parent=FBgn0036529,FBtr0075578;
FBpp0077211	GT2_Glycos_transf_2	3e-22	80	0	5.2e-22	79.2	0	ID=FBpp0077211;	name=CG31776-PA;	parent=FBgn0051776,FBtr0077522;
FBpp0079234	GT2_Glycos_transf_2	3.4e-22	79.8	0	4.3e-22	79.5	0	ID=FBpp0079234;	name=wol-PA;	parent=FBgn0261020,FBtr0079614;
FBpp0075330	GT2_Glycos_transf_2	2.5e-17	64	0	4.5e-17	63.1	0	ID=FBpp0075330;	name=CG7304-PB;	parent=FBgn0036527,FBtr0075577;
FBpp0075334	GT2_Glycos_transf_2	1.3e-15	58.4	0	2.1e-15	57.7	0	ID=FBpp0075334;	name=CG7579-PA;	parent=FBgn0036528,FBtr0075581;
FBpp0309020	GT2_Glycos_transf_2	2.5e-13	50.9	0	1.2e-12	48.7	0	ID=FBpp0309020;	name=Pgant1-PC;	parent=FBgn0034025,FBtr0340001;
FBpp0073880	GT2_Glycos_transf_2	3.4e-07	31	0.1	0.0054	17.3	0.1	ID=FBpp0073880;	name=Chsy-PC;	parent=FBgn0030662,FBtr0074064;
FBpp0309305	GT2_Glycos_transf_2	3.4e-07	31	0.1	0.0054	17.3	0.1	ID=FBpp0309305;	name=Chsy-PD;	parent=FBgn0030662,FBtr0340347;
FBpp0075331	GT2_Glyco_tranf_2_2	1.9e-09	38.2	0	3.6e-09	37.3	0	ID=FBpp0075331;	name=Pgant8-PA;	parent=FBgn0036529,FBtr0075578;
FBpp0078663	GT2_Glyco_tranf_2_2	5.7e-06	26.8	0	1.6e-05	25.3	0	ID=FBpp0078663;	name=Pgant5-PA;	parent=FBgn0031681,FBtr0079026;
FBpp0074395	GT2_Glyco_tranf_2_2	6.5e-06	26.6	0	0.012	15.9	0	ID=FBpp0074395;	name=Pgant7-PA;	parent=FBgn0030930,FBtr0074624;
FBpp0074396	GT2_Glyco_tranf_2_2	6.5e-06	26.6	0	0.012	15.9	0	ID=FBpp0074396;	name=Pgant7-PB;	parent=FBgn0030930,FBtr0074625;
FBpp0311917	GT2_Glyco_tranf_2_2	6.5e-06	26.6	0	0.012	15.9	0	ID=FBpp0311917;	name=Pgant7-PC;	parent=FBgn0030930,FBtr0346082;
FBpp0071669	GT2_Glyco_tranf_2_3	1.8e-16	61.5	0	2.4e-16	61.1	0	ID=FBpp0071669;	name=GlcT-PA;	parent=FBgn0067102,FBtr0071755;
FBpp0080817	GT2_Glyco_tranf_2_3	6.5e-15	56.4	0	9e-15	55.9	0	ID=FBpp0080817;	name=Dpm1-PA;	parent=FBgn0032799,FBtr0081279;
FBpp0074395	GT2_Glyco_tranf_2_3	2.5e-12	47.9	0	3.7e-12	47.4	0	ID=FBpp0074395;	name=Pgant7-PA;	parent=FBgn0030930,FBtr0074624;
FBpp0074396	GT2_Glyco_tranf_2_3	2.5e-12	47.9	0	3.7e-12	47.4	0	ID=FBpp0074396;	name=Pgant7-PB;	parent=FBgn0030930,FBtr0074625;
FBpp0311917	GT2_Glyco_tranf_2_3	2.5e-12	47.9	0	3.7e-12	47.4	0	ID=FBpp0311917;	name=Pgant7-PC;	parent=FBgn0030930,FBtr0346082;
FBpp0079234	GT2_Glyco_tranf_2_3	3.4e-09	37.7	0	5.9e-09	36.9	0	ID=FBpp0079234;	name=wol-PA;	parent=FBgn0261020,FBtr0079614;
FBpp0300424	GT2_Glyco_tranf_2_3	2.5e-07	31.6	0.1	5.9e-07	30.4	0.1	ID=FBpp0300424;	name=Chs2-PC;	parent=FBgn0029091,FBtr0308081;
FBpp0306214	GT2_Glyco_tranf_2_3	2.5e-07	31.6	0.1	5.9e-07	30.4	0.1	ID=FBpp0306214;	name=Chs2-PD;	parent=FBgn0029091,FBtr0334089;
FBpp0099799	GT2_Glyco_tranf_2_3	1.1e-06	29.5	0	2.1e-06	28.6	0	ID=FBpp0099799;	name=Pgant2-PA;	parent=FBgn0031530,FBtr0077592;
FBpp0292961	GT2_Glyco_tranf_2_3	1.1e-06	29.5	0	2.1e-06	28.6	0	ID=FBpp0292961;	name=Pgant2-PB;	parent=FBgn0031530,FBtr0303992;
FBpp0070423	GT2_Glyco_tranf_2_3	4.3e-06	27.6	0	6.7e-06	26.9	0	ID=FBpp0070423;	name=egh-PC;	parent=FBgn0001404,FBtr0070439;
FBpp0070424	GT2_Glyco_tranf_2_3	4.3e-06	27.6	0	6.7e-06	26.9	0	ID=FBpp0070424;	name=egh-PB;	parent=FBgn0001404,FBtr0070440;
FBpp0309090	GT2_Glyco_tranf_2_3	4.3e-06	27.6	0	6.7e-06	26.9	0	ID=FBpp0309090;	name=egh-PD;	parent=FBgn0001404,FBtr0340091;
FBpp0078732	GT2_Glyco_tranf_2_4	1.9e-10	41.9	0.2	5.1e-10	40.5	0.2	ID=FBpp0078732;	name=CG31915-PA;	parent=FBgn0051915,FBtr0079099;
FBpp0070423	GT2_Glyco_trans_2_3	6.9e-47	160.7	0.5	6.9e-47	160.7	0.5	ID=FBpp0070423;	name=egh-PC;	parent=FBgn0001404,FBtr0070439;
FBpp0070424	GT2_Glyco_trans_2_3	6.9e-47	160.7	0.5	6.9e-47	160.7	0.5	ID=FBpp0070424;	name=egh-PB;	parent=FBgn0001404,FBtr0070440;
FBpp0309090	GT2_Glyco_trans_2_3	6.9e-47	160.7	0.5	6.9e-47	160.7	0.5	ID=FBpp0309090;	name=egh-PD;	parent=FBgn0001404,FBtr0340091;
FBpp0078442	GT2_Glyco_trans_2_3	2.1e-11	44.9	1.6	2.1e-11	44.9	1.6	ID=FBpp0078442;	name=kkv-PA;	parent=FBgn0001311,FBtr0078798;
FBpp0089164	GT2_Glyco_trans_2_3	2.1e-11	44.9	1.6	2.1e-11	44.9	1.6	ID=FBpp0089164;	name=kkv-PC;	parent=FBgn0001311,FBtr0078800;
FBpp0290640	GT2_Glyco_trans_2_3	2.1e-11	44.9	1.6	2.1e-11	44.9	1.6	ID=FBpp0290640;	name=kkv-PD;	parent=FBgn0001311,FBtr0301398;
FBpp0300424	GT2_Glyco_trans_2_3	2.2e-11	44.8	10.3	2.2e-11	44.8	10.3	ID=FBpp0300424;	name=Chs2-PC;	parent=FBgn0029091,FBtr0308081;
FBpp0306214	GT2_Glyco_trans_2_3	2.2e-11	44.8	10.3	2.2e-11	44.8	10.3	ID=FBpp0306214;	name=Chs2-PD;	parent=FBgn0029091,FBtr0334089;
FBpp0071669	GT2_Glyco_trans_2_3	1.3e-06	29.2	2.9	1.3e-06	29.2	2.9	ID=FBpp0071669;	name=GlcT-PA;	parent=FBgn0067102,FBtr0071755;
FBpp0079407	AA1_1	2.4e-69	234.5	0.2	4.1e-40	138.6	0.2	ID=FBpp0079407;	name=Mco1-PA;	parent=FBgn0032116,FBtr0079807;
FBpp0292899	AA1_1	2.4e-69	234.5	0.2	4.1e-40	138.6	0.2	ID=FBpp0292899;	name=Mco1-PB;	parent=FBgn0032116,FBtr0303896;
FBpp0292900	AA1_1	2.4e-69	234.5	0.2	4.1e-40	138.6	0.2	ID=FBpp0292900;	name=Mco1-PC;	parent=FBgn0032116,FBtr0303897;
FBpp0289199	AA1_1	1.3e-65	222.3	0.1	2.7e-65	221.2	0	ID=FBpp0289199;	name=stw-PE;	parent=FBgn0286203,FBtr0299921;
FBpp0307245	AA1_1	1.3e-65	222.3	0	2.8e-65	221.2	0	ID=FBpp0307245;	name=stw-PG;	parent=FBgn0286203,FBtr0335262;
FBpp0290285	AA1_1	1.7e-65	221.9	0	2.4e-65	221.4	0	ID=FBpp0290285;	name=stw-PF;	parent=FBgn0286203,FBtr0301063;
FBpp0289196	AA1_1	1.8e-65	221.8	0	2.7e-65	221.2	0	ID=FBpp0289196;	name=stw-PA;	parent=FBgn0286203,FBtr0299918;
FBpp0289198	AA1_1	1.9e-65	221.7	0	2.8e-65	221.2	0	ID=FBpp0289198;	name=stw-PD;	parent=FBgn0286203,FBtr0299920;
FBpp0074240	AA1_1	5.8e-63	213.6	0.5	1e-62	212.8	0.5	ID=FBpp0074240;	name=Mco4-PA;	parent=FBgn0052557,FBtr0074466;
FBpp0084314	AA1_1	7.1e-49	167.3	0.4	1.8e-48	166	0.1	ID=FBpp0084314;	name=Mco3-PA;	parent=FBgn0039387,FBtr0084940;
FBpp0074240	AA1_2	7e-47	160.9	2.6	1.9e-46	159.4	0.2	ID=FBpp0074240;	name=Mco4-PA;	parent=FBgn0052557,FBtr0074466;
FBpp0290285	AA1_2	9.2e-47	160.5	0.3	1.4e-46	159.8	0.3	ID=FBpp0290285;	name=stw-PF;	parent=FBgn0286203,FBtr0301063;
FBpp0289198	AA1_2	9.3e-47	160.5	0.3	1.6e-46	159.7	0.3	ID=FBpp0289198;	name=stw-PD;	parent=FBgn0286203,FBtr0299920;
FBpp0289196	AA1_2	1e-46	160.3	0.3	1.6e-46	159.7	0.3	ID=FBpp0289196;	name=stw-PA;	parent=FBgn0286203,FBtr0299918;
FBpp0289199	AA1_2	1.6e-46	159.7	0.3	1.6e-46	159.7	0.3	ID=FBpp0289199;	name=stw-PE;	parent=FBgn0286203,FBtr0299921;
FBpp0307245	AA1_2	1.6e-46	159.7	0.3	1.6e-46	159.7	0.3	ID=FBpp0307245;	name=stw-PG;	parent=FBgn0286203,FBtr0335262;
FBpp0079407	AA1_2	5.5e-45	154.6	0.2	3.4e-44	152	0.2	ID=FBpp0079407;	name=Mco1-PA;	parent=FBgn0032116,FBtr0079807;
FBpp0292899	AA1_2	5.5e-45	154.6	0.2	3.4e-44	152	0.2	ID=FBpp0292899;	name=Mco1-PB;	parent=FBgn0032116,FBtr0303896;
FBpp0292900	AA1_2	5.5e-45	154.6	0.2	3.4e-44	152	0.2	ID=FBpp0292900;	name=Mco1-PC;	parent=FBgn0032116,FBtr0303897;
FBpp0084314	AA1_2	1.5e-42	146.6	4.6	3.3e-42	145.5	0.2	ID=FBpp0084314;	name=Mco3-PA;	parent=FBgn0039387,FBtr0084940;
FBpp0079407	AA1_3	7.9e-69	233	1.6	1.4e-66	225.6	0.7	ID=FBpp0079407;	name=Mco1-PA;	parent=FBgn0032116,FBtr0079807;
FBpp0292899	AA1_3	7.9e-69	233	1.6	1.4e-66	225.6	0.7	ID=FBpp0292899;	name=Mco1-PB;	parent=FBgn0032116,FBtr0303896;
FBpp0292900	AA1_3	7.9e-69	233	1.6	1.4e-66	225.6	0.7	ID=FBpp0292900;	name=Mco1-PC;	parent=FBgn0032116,FBtr0303897;
FBpp0289199	AA1_3	7.2e-65	220	0.7	7.4e-64	216.7	0.2	ID=FBpp0289199;	name=stw-PE;	parent=FBgn0286203,FBtr0299921;
FBpp0307245	AA1_3	7.3e-65	220	0.7	7.4e-64	216.7	0.2	ID=FBpp0307245;	name=stw-PG;	parent=FBgn0286203,FBtr0335262;
FBpp0290285	AA1_3	7.5e-65	219.9	0.2	6.7e-64	216.8	0.2	ID=FBpp0290285;	name=stw-PF;	parent=FBgn0286203,FBtr0301063;
FBpp0289196	AA1_3	8.5e-65	219.7	0.2	7.4e-64	216.7	0.2	ID=FBpp0289196;	name=stw-PA;	parent=FBgn0286203,FBtr0299918;
FBpp0289198	AA1_3	1.6e-64	218.8	1.1	7.4e-64	216.7	0.2	ID=FBpp0289198;	name=stw-PD;	parent=FBgn0286203,FBtr0299920;
FBpp0074240	AA1_3	3.8e-63	214.3	2.2	3.8e-63	214.3	2.2	ID=FBpp0074240;	name=Mco4-PA;	parent=FBgn0052557,FBtr0074466;
FBpp0084314	AA1_3	1.6e-55	189.2	1.1	2.3e-54	185.5	0.1	ID=FBpp0084314;	name=Mco3-PA;	parent=FBgn0039387,FBtr0084940;
FBpp0073792	AA3_1	6e-56	190.9	0	1.2e-38	133.8	0	ID=FBpp0073792;	name=Eo-PA;	parent=FBgn0030597,FBtr0073975;
FBpp0084360	AA3_1	5.4e-55	187.8	0	5.5e-36	125	0	ID=FBpp0084360;	name=CG6142-PA;	parent=FBgn0039415,FBtr0084987;
FBpp0073795	AA3_1	3.7e-53	181.7	0	6.6e-52	177.6	0	ID=FBpp0073795;	name=fiz-PA;	parent=FBgn0030594,FBtr0073978;
FBpp0310035	AA3_1	3.7e-53	181.7	0	6.6e-52	177.6	0	ID=FBpp0310035;	name=fiz-PB;	parent=FBgn0030594,FBtr0343380;
FBpp0081114	AA3_1	3.5e-52	178.5	0	1.9e-51	176	0	ID=FBpp0081114;	name=Gld-PA;	parent=FBgn0001112,FBtr0081596;
FBpp0422604	AA3_1	3.8e-52	178.4	0	2.1e-51	175.9	0	ID=FBpp0422604;	name=Gld-PB;	parent=FBgn0001112,FBtr0472596;
FBpp0310796	AA3_1	3.4e-49	168.6	0	1.3e-33	117.2	0	ID=FBpp0310796;	name=CG45065-PA;	parent=FBgn0266435,FBtr0344424;
FBpp0073800	AA3_1	1.2e-48	166.8	0	1.9e-32	113.3	0	ID=FBpp0073800;	name=CG9518-PA;	parent=FBgn0030590,FBtr0073983;
FBpp0310195	AA3_1	1.2e-48	166.8	0	1.9e-32	113.3	0	ID=FBpp0310195;	name=CG9518-PB;	parent=FBgn0030590,FBtr0343598;
FBpp0310587	AA3_1	1.2e-48	166.8	0	1.9e-32	113.3	0	ID=FBpp0310587;	name=CG9518-PC;	parent=FBgn0030590,FBtr0344175;
FBpp0073802	AA3_1	1.9e-48	166.2	0	3.8e-31	109.1	0.1	ID=FBpp0073802;	name=CG9521-PA;	parent=FBgn0030588,FBtr0073985;
FBpp0073797	AA3_1	1.7e-47	163	0	2.4e-32	113	0	ID=FBpp0073797;	name=CG9514-PA;	parent=FBgn0030592,FBtr0073980;
FBpp0073796	AA3_1	3.7e-47	161.9	0.3	2.7e-46	159.1	0.3	ID=FBpp0073796;	name=CG9512-PA;	parent=FBgn0030593,FBtr0073979;
FBpp0310036	AA3_1	3.7e-47	161.9	0.3	2.7e-46	159.1	0.3	ID=FBpp0310036;	name=CG9512-PB;	parent=FBgn0030593,FBtr0343381;
FBpp0073801	AA3_1	6.4e-46	157.8	0	5.1e-29	102	0	ID=FBpp0073801;	name=CG9519-PA;	parent=FBgn0030589,FBtr0073984;
FBpp0073791	AA3_1	2.7e-45	155.8	0	2.2e-29	103.3	0	ID=FBpp0073791;	name=CG9503-PA;	parent=FBgn0030598,FBtr0073974;
FBpp0073793	AA3_1	6.1e-45	154.6	0	2.3e-28	99.9	0	ID=FBpp0073793;	name=CG12398-PA;	parent=FBgn0030596,FBtr0073976;
FBpp0073803	AA3_1	7.3e-44	151	0	7.6e-30	104.8	0	ID=FBpp0073803;	name=CG9522-PA;	parent=FBgn0030587,FBtr0073986;
FBpp0073804	AA3_1	7.5e-43	147.7	0	3.8e-29	102.5	0	ID=FBpp0073804;	name=CG12539-PA;	parent=FBgn0030586,FBtr0073987;
FBpp0081880	AA3_1	2.3e-38	132.9	0	8.8e-24	84.8	0	ID=FBpp0081880;	name=ninaG-PA;	parent=FBgn0037896,FBtr0082404;
FBpp0290369	AA3_1	1.5e-28	100.5	0	5.7e-12	45.8	0	ID=FBpp0290369;	name=ninaG-PB;	parent=FBgn0037896,FBtr0301146;
FBpp0073800	AA3_2	2.2e-178	595.3	0	3e-178	594.9	0	ID=FBpp0073800;	name=CG9518-PA;	parent=FBgn0030590,FBtr0073983;
FBpp0310195	AA3_2	2.2e-178	595.3	0	3e-178	594.9	0	ID=FBpp0310195;	name=CG9518-PB;	parent=FBgn0030590,FBtr0343598;
FBpp0310587	AA3_2	2.2e-178	595.3	0	3e-178	594.9	0	ID=FBpp0310587;	name=CG9518-PC;	parent=FBgn0030590,FBtr0344175;
FBpp0310796	AA3_2	2e-176	588.8	0	2.3e-176	588.6	0	ID=FBpp0310796;	name=CG45065-PA;	parent=FBgn0266435,FBtr0344424;
FBpp0073791	AA3_2	1.2e-174	582.9	0	1.6e-174	582.6	0	ID=FBpp0073791;	name=CG9503-PA;	parent=FBgn0030598,FBtr0073974;
FBpp0073802	AA3_2	5.3e-171	570.9	0	6.1e-171	570.7	0	ID=FBpp0073802;	name=CG9521-PA;	parent=FBgn0030588,FBtr0073985;
FBpp0073797	AA3_2	8.6e-171	570.3	0	1.1e-170	569.9	0	ID=FBpp0073797;	name=CG9514-PA;	parent=FBgn0030592,FBtr0073980;
FBpp0073793	AA3_2	5.7e-168	560.9	0	6.5e-168	560.7	0	ID=FBpp0073793;	name=CG12398-PA;	parent=FBgn0030596,FBtr0073976;
FBpp0084360	AA3_2	5e-167	557.8	0	5.6e-167	557.7	0	ID=FBpp0084360;	name=CG6142-PA;	parent=FBgn0039415,FBtr0084987;
FBpp0073801	AA3_2	8.4e-167	557.1	0	9.6e-167	556.9	0	ID=FBpp0073801;	name=CG9519-PA;	parent=FBgn0030589,FBtr0073984;
FBpp0081114	AA3_2	7e-159	530.9	0	8.2e-159	530.7	0	ID=FBpp0081114;	name=Gld-PA;	parent=FBgn0001112,FBtr0081596;
FBpp0422604	AA3_2	7.6e-159	530.8	0	8.8e-159	530.6	0	ID=FBpp0422604;	name=Gld-PB;	parent=FBgn0001112,FBtr0472596;
FBpp0073796	AA3_2	3.7e-158	528.5	0	4.2e-158	528.3	0	ID=FBpp0073796;	name=CG9512-PA;	parent=FBgn0030593,FBtr0073979;
FBpp0310036	AA3_2	3.7e-158	528.5	0	4.2e-158	528.3	0	ID=FBpp0310036;	name=CG9512-PB;	parent=FBgn0030593,FBtr0343381;
FBpp0073804	AA3_2	1.4e-155	520.1	0	1.6e-155	519.9	0	ID=FBpp0073804;	name=CG12539-PA;	parent=FBgn0030586,FBtr0073987;
FBpp0073803	AA3_2	1.5e-155	519.9	0	1.7e-155	519.7	0	ID=FBpp0073803;	name=CG9522-PA;	parent=FBgn0030587,FBtr0073986;
FBpp0073795	AA3_2	1.3e-154	516.8	0	1.5e-154	516.6	0	ID=FBpp0073795;	name=fiz-PA;	parent=FBgn0030594,FBtr0073978;
FBpp0310035	AA3_2	1.3e-154	516.8	0	1.5e-154	516.6	0	ID=FBpp0310035;	name=fiz-PB;	parent=FBgn0030594,FBtr0343380;
FBpp0073792	AA3_2	2.9e-128	429.9	0	5.6e-128	428.9	0	ID=FBpp0073792;	name=Eo-PA;	parent=FBgn0030597,FBtr0073975;
FBpp0081880	AA3_2	2.6e-105	354.1	0	1e-102	345.5	0	ID=FBpp0081880;	name=ninaG-PA;	parent=FBgn0037896,FBtr0082404;
FBpp0290369	AA3_2	1.7e-89	301.9	0	1.3e-56	193.3	0	ID=FBpp0290369;	name=ninaG-PB;	parent=FBgn0037896,FBtr0301146;
FBpp0073802	AA3_3	3.8e-75	254.2	0	1e-56	193.4	0	ID=FBpp0073802;	name=CG9521-PA;	parent=FBgn0030588,FBtr0073985;
FBpp0073793	AA3_3	5.6e-74	250.3	0	1.5e-54	186.2	0	ID=FBpp0073793;	name=CG12398-PA;	parent=FBgn0030596,FBtr0073976;
FBpp0073803	AA3_3	1.8e-72	245.4	0	9.5e-55	186.8	0	ID=FBpp0073803;	name=CG9522-PA;	parent=FBgn0030587,FBtr0073986;
FBpp0073796	AA3_3	3.4e-72	244.5	0	8.1e-71	239.9	0	ID=FBpp0073796;	name=CG9512-PA;	parent=FBgn0030593,FBtr0073979;
FBpp0310036	AA3_3	3.4e-72	244.5	0	8.1e-71	239.9	0	ID=FBpp0310036;	name=CG9512-PB;	parent=FBgn0030593,FBtr0343381;
FBpp0073800	AA3_3	1e-71	242.9	0	2e-53	182.4	0	ID=FBpp0073800;	name=CG9518-PA;	parent=FBgn0030590,FBtr0073983;
FBpp0310195	AA3_3	1e-71	242.9	0	2e-53	182.4	0	ID=FBpp0310195;	name=CG9518-PB;	parent=FBgn0030590,FBtr0343598;
FBpp0310587	AA3_3	1e-71	242.9	0	2e-53	182.4	0	ID=FBpp0310587;	name=CG9518-PC;	parent=FBgn0030590,FBtr0344175;
FBpp0073797	AA3_3	4.5e-71	240.7	0	1.7e-55	189.3	0	ID=FBpp0073797;	name=CG9514-PA;	parent=FBgn0030592,FBtr0073980;
FBpp0084360	AA3_3	3.2e-70	237.9	0	1.3e-55	189.7	0	ID=FBpp0084360;	name=CG6142-PA;	parent=FBgn0039415,FBtr0084987;
FBpp0081114	AA3_3	1.4e-69	235.8	0	6.4e-51	174.2	0	ID=FBpp0081114;	name=Gld-PA;	parent=FBgn0001112,FBtr0081596;
FBpp0422604	AA3_3	1.6e-69	235.6	0	6.8e-51	174.1	0	ID=FBpp0422604;	name=Gld-PB;	parent=FBgn0001112,FBtr0472596;
FBpp0073804	AA3_3	4.4e-69	234.2	0	1e-51	176.8	0	ID=FBpp0073804;	name=CG12539-PA;	parent=FBgn0030586,FBtr0073987;
FBpp0073801	AA3_3	6.6e-69	233.6	0	2.4e-52	178.9	0	ID=FBpp0073801;	name=CG9519-PA;	parent=FBgn0030589,FBtr0073984;
FBpp0073795	AA3_3	1.7e-67	228.9	0	5.3e-49	167.9	0	ID=FBpp0073795;	name=fiz-PA;	parent=FBgn0030594,FBtr0073978;
FBpp0310035	AA3_3	1.7e-67	228.9	0	5.3e-49	167.9	0	ID=FBpp0310035;	name=fiz-PB;	parent=FBgn0030594,FBtr0343380;
FBpp0073791	AA3_3	1.4e-65	222.6	0	1.4e-44	153.3	0	ID=FBpp0073791;	name=CG9503-PA;	parent=FBgn0030598,FBtr0073974;
FBpp0310796	AA3_3	1.2e-63	216.2	0	5.4e-46	157.9	0	ID=FBpp0310796;	name=CG45065-PA;	parent=FBgn0266435,FBtr0344424;
FBpp0073792	AA3_3	5.7e-51	174.4	0.1	3.5e-25	89.2	0.1	ID=FBpp0073792;	name=Eo-PA;	parent=FBgn0030597,FBtr0073975;
FBpp0081880	AA3_3	2.6e-37	129.3	0	5.3e-15	55.6	0	ID=FBpp0081880;	name=ninaG-PA;	parent=FBgn0037896,FBtr0082404;
FBpp0290369	AA3_3	6.2e-27	95	0	2.1e-09	37.1	0	ID=FBpp0290369;	name=ninaG-PB;	parent=FBgn0037896,FBtr0301146;
FBpp0073802	AA3_4	1.5e-09	37.9	0	0.0088	15.6	0	ID=FBpp0073802;	name=CG9521-PA;	parent=FBgn0030588,FBtr0073985;
FBpp0073800	AA3_4	5.3e-08	32.8	0	0.0064	16	0	ID=FBpp0073800;	name=CG9518-PA;	parent=FBgn0030590,FBtr0073983;
FBpp0310195	AA3_4	5.3e-08	32.8	0	0.0064	16	0	ID=FBpp0310195;	name=CG9518-PB;	parent=FBgn0030590,FBtr0343598;
FBpp0310587	AA3_4	5.3e-08	32.8	0	0.0064	16	0	ID=FBpp0310587;	name=CG9518-PC;	parent=FBgn0030590,FBtr0344175;
FBpp0073796	AA3_4	9e-08	32.1	0.1	0.03	13.8	0	ID=FBpp0073796;	name=CG9512-PA;	parent=FBgn0030593,FBtr0073979;
FBpp0310036	AA3_4	9e-08	32.1	0.1	0.03	13.8	0	ID=FBpp0310036;	name=CG9512-PB;	parent=FBgn0030593,FBtr0343381;
FBpp0084360	AA3_4	3.4e-07	30.2	0.1	0.15	11.5	0	ID=FBpp0084360;	name=CG6142-PA;	parent=FBgn0039415,FBtr0084987;
FBpp0073795	AA3_4	4.6e-07	29.7	0	0.0087	15.6	0	ID=FBpp0073795;	name=fiz-PA;	parent=FBgn0030594,FBtr0073978;
FBpp0310035	AA3_4	4.6e-07	29.7	0	0.0087	15.6	0	ID=FBpp0310035;	name=fiz-PB;	parent=FBgn0030594,FBtr0343380;
FBpp0081880	AA3_4	3e-06	27.1	0	0.0063	16.1	0	ID=FBpp0081880;	name=ninaG-PA;	parent=FBgn0037896,FBtr0082404;
FBpp0073803	AA3_4	4.8e-06	26.3	0	1	8.8	0	ID=FBpp0073803;	name=CG9522-PA;	parent=FBgn0030587,FBtr0073986;
FBpp0073801	AA3_4	9.3e-06	25.4	0	0.023	14.2	0	ID=FBpp0073801;	name=CG9519-PA;	parent=FBgn0030589,FBtr0073984;
FBpp0082030	AA5_2	1.9e-20	73.8	9.2	1.3e-06	28.1	0.4	ID=FBpp0082030;	name=KLHL18-PB;	parent=FBgn0037978,FBtr0082557;
FBpp0082029	AA5_2	4.2e-20	72.7	11	1.4e-06	28	0.4	ID=FBpp0082029;	name=KLHL18-PA;	parent=FBgn0037978,FBtr0082556;
FBpp0307415	AA5_2	4.2e-20	72.7	11	1.4e-06	28	0.4	ID=FBpp0307415;	name=KLHL18-PC;	parent=FBgn0037978,FBtr0335434;
FBpp0112408	AA5_2	1e-15	58.2	2.2	2.4e-05	23.9	0	ID=FBpp0112408;	name=klhl10-PA;	parent=FBgn0040038,FBtr0113685;
FBpp0112409	AA5_2	1e-15	58.2	2.2	2.4e-05	23.9	0	ID=FBpp0112409;	name=klhl10-PB;	parent=FBgn0040038,FBtr0113686;
FBpp0080595	AA5_2	5.6e-15	55.7	1.5	8.8e-06	25.4	0	ID=FBpp0080595;	name=kel-PA;	parent=FBgn0001301,FBtr0081042;
FBpp0080063	AA5_2	4.2e-13	49.5	0	4.7e-07	29.6	0	ID=FBpp0080063;	name=CG9426-PA;	parent=FBgn0032485,FBtr0080484;
FBpp0304443	AA5_2	9.1e-13	48.4	0.4	8.5e-05	22.1	0.1	ID=FBpp0304443;	name=dbo-PB;	parent=FBgn0040230,FBtr0332133;
FBpp0075260	AA5_2	1.2e-12	48.1	0.4	0.00011	21.8	0.1	ID=FBpp0075260;	name=dbo-PA;	parent=FBgn0040230,FBtr0075505;
FBpp0085812	AA5_2	1.6e-10	41	0.7	0.02	14.2	0	ID=FBpp0085812;	name=CG15097-PA;	parent=FBgn0034396,FBtr0086630;
FBpp0292329	AA5_2	3.6e-10	39.9	0.7	0.027	13.8	0	ID=FBpp0292329;	name=CG15097-PC;	parent=FBgn0034396,FBtr0303237;
FBpp0082863	AA5_2	4.4e-10	39.6	0.1	0.002	17.6	0	ID=FBpp0082863;	name=Keap1-PA;	parent=FBgn0038475,FBtr0083422;
FBpp0082865	AA5_2	4.4e-10	39.6	0.1	0.002	17.6	0	ID=FBpp0082865;	name=Keap1-PC;	parent=FBgn0038475,FBtr0083424;
FBpp0082864	AA5_2	5.3e-10	39.3	0.1	0.0021	17.5	0	ID=FBpp0082864;	name=Keap1-PB;	parent=FBgn0038475,FBtr0083423;
FBpp0303454	AA5_2	7.1e-10	38.9	0.7	0.028	13.8	0	ID=FBpp0303454;	name=CG15097-PD;	parent=FBgn0034396,FBtr0330604;
FBpp0303455	AA5_2	7.4e-10	38.8	0.7	0.035	13.5	0	ID=FBpp0303455;	name=CG15097-PE;	parent=FBgn0034396,FBtr0330605;
FBpp0309114	AA5_2	2.6e-09	37	0	0.095	12	0	ID=FBpp0309114;	name=CG17754-PE;	parent=FBgn0030114,FBtr0340121;
FBpp0071250	AA5_2	4.9e-09	36.1	0.1	0.019	14.3	0	ID=FBpp0071250;	name=CG17754-PD;	parent=FBgn0030114,FBtr0071315;
FBpp0309115	AA5_2	4.9e-09	36.1	0.1	0.019	14.3	0	ID=FBpp0309115;	name=CG17754-PF;	parent=FBgn0030114,FBtr0340122;
FBpp0309116	AA5_2	5.9e-09	35.8	0.1	0.13	11.6	0	ID=FBpp0309116;	name=CG17754-PG;	parent=FBgn0030114,FBtr0340123;
FBpp0071249	AA5_2	6e-09	35.8	0.1	0.13	11.6	0	ID=FBpp0071249;	name=CG17754-PC;	parent=FBgn0030114,FBtr0071314;
FBpp0071251	AA5_2	6e-09	35.8	0.1	0.13	11.6	0	ID=FBpp0071251;	name=CG17754-PA;	parent=FBgn0030114,FBtr0071316;
FBpp0086845	GH13_10	2e-27	97.2	1.6	3.5e-27	96.3	1.6	ID=FBpp0086845;	name=AGBE-PA;	parent=FBgn0053138,FBtr0087732;
FBpp0079860	GH13_10	1.6e-22	81	0	3.5e-21	76.6	0	ID=FBpp0079860;	name=Mal-B2-PA;	parent=FBgn0032382,FBtr0080276;
FBpp0423050	GH13_10	1.8e-22	80.8	0	3.8e-21	76.5	0	ID=FBpp0423050;	name=Mal-B2-PE;	parent=FBgn0032382,FBtr0473587;
FBpp0423051	GH13_10	1.8e-22	80.8	0	3.8e-21	76.5	0	ID=FBpp0423051;	name=Mal-B2-PF;	parent=FBgn0032382,FBtr0473588;
FBpp0087826	GH13_10	1.3e-19	71.4	0.1	3e-19	70.3	0.1	ID=FBpp0087826;	name=Mal-A2-PA;	parent=FBgn0002569,FBtr0088747;
FBpp0079859	GH13_10	2.7e-18	67.1	0	2.1e-17	64.3	0	ID=FBpp0079859;	name=Mal-B1-PA;	parent=FBgn0032381,FBtr0080275;
FBpp0087827	GH13_10	7.6e-18	65.7	0.1	1.4e-16	61.6	0.3	ID=FBpp0087827;	name=Mal-A4-PA;	parent=FBgn0033294,FBtr0088748;
FBpp0087836	GH13_10	8.4e-18	65.5	0.3	7.8e-17	62.4	0.2	ID=FBpp0087836;	name=Mal-A7-PA;	parent=FBgn0033296,FBtr0088757;
FBpp0311600	GH13_10	8.4e-18	65.5	0.3	7.8e-17	62.4	0.2	ID=FBpp0311600;	name=Mal-A7-PB;	parent=FBgn0033296,FBtr0345489;
FBpp0271830	GH13_10	8.9e-18	65.4	0.2	4.9e-16	59.7	0	ID=FBpp0271830;	name=Mal-A6-PC;	parent=FBgn0050360,FBtr0273322;
FBpp0312227	GH13_10	8.9e-18	65.4	0.2	4.9e-16	59.7	0	ID=FBpp0312227;	name=Mal-A6-PD;	parent=FBgn0050360,FBtr0346647;
FBpp0087831	GH13_10	9.5e-17	62.1	0	8.5e-16	59	0	ID=FBpp0087831;	name=Mal-A8-PA;	parent=FBgn0033297,FBtr0088752;
FBpp0087837	GH13_10	2.1e-15	57.7	0.1	1.5e-13	51.5	0.1	ID=FBpp0087837;	name=Mal-A3-PA;	parent=FBgn0002571,FBtr0088758;
FBpp0308388	GH13_10	2.2e-15	57.6	0.1	6.9e-15	56	0.1	ID=FBpp0308388;	name=Mal-A5-PC;	parent=FBgn0050359,FBtr0339279;
FBpp0087828	GH13_10	2.3e-15	57.5	0.1	7.3e-15	55.9	0.1	ID=FBpp0087828;	name=Mal-A5-PA;	parent=FBgn0050359,FBtr0088749;
FBpp0087838	GH13_10	3.9e-15	56.8	0.3	9.6e-15	55.5	0.3	ID=FBpp0087838;	name=Mal-A1-PA;	parent=FBgn0002570,FBtr0088759;
FBpp0086155	GH13_10	8e-10	39.3	0.1	1.1e-06	29	0	ID=FBpp0086155;	name=Amy-p-PA;	parent=FBgn0000079,FBtr0087004;
FBpp0311627	GH13_10	8e-10	39.3	0.1	1.1e-06	29	0	ID=FBpp0311627;	name=Amy-p-PB;	parent=FBgn0000079,FBtr0345521;
FBpp0086136	GH13_10	8.1e-10	39.3	0.1	1.1e-06	29	0	ID=FBpp0086136;	name=Amy-d-PA;	parent=FBgn0000078,FBtr0086983;
FBpp0290175	GH13_10	3.2e-08	34.1	0.7	8.6e-08	32.7	0.4	ID=FBpp0290175;	name=Mal-A5-PB;	parent=FBgn0050359,FBtr0300953;
FBpp0086845	GH13_11	1.5e-15	58.1	1	2.4e-15	57.4	1	ID=FBpp0086845;	name=AGBE-PA;	parent=FBgn0053138,FBtr0087732;
FBpp0087836	GH13_11	5.6e-15	56.2	0	2.6e-14	54	0	ID=FBpp0087836;	name=Mal-A7-PA;	parent=FBgn0033296,FBtr0088757;
FBpp0311600	GH13_11	5.6e-15	56.2	0	2.6e-14	54	0	ID=FBpp0311600;	name=Mal-A7-PB;	parent=FBgn0033296,FBtr0345489;
FBpp0271830	GH13_11	1e-13	52.1	0.2	7.4e-13	49.2	0.2	ID=FBpp0271830;	name=Mal-A6-PC;	parent=FBgn0050360,FBtr0273322;
FBpp0312227	GH13_11	1e-13	52.1	0.2	7.4e-13	49.2	0.2	ID=FBpp0312227;	name=Mal-A6-PD;	parent=FBgn0050360,FBtr0346647;
FBpp0087826	GH13_11	1.4e-13	51.6	0.1	5.4e-13	49.7	0.1	ID=FBpp0087826;	name=Mal-A2-PA;	parent=FBgn0002569,FBtr0088747;
FBpp0087831	GH13_11	1.5e-13	51.5	0.1	6.7e-13	49.4	0	ID=FBpp0087831;	name=Mal-A8-PA;	parent=FBgn0033297,FBtr0088752;
FBpp0079860	GH13_11	5.4e-13	49.7	0.1	2.1e-12	47.7	0.1	ID=FBpp0079860;	name=Mal-B2-PA;	parent=FBgn0032382,FBtr0080276;
FBpp0423050	GH13_11	6e-13	49.6	0.1	2.3e-12	47.6	0.1	ID=FBpp0423050;	name=Mal-B2-PE;	parent=FBgn0032382,FBtr0473587;
FBpp0423051	GH13_11	6e-13	49.6	0.1	2.3e-12	47.6	0.1	ID=FBpp0423051;	name=Mal-B2-PF;	parent=FBgn0032382,FBtr0473588;
FBpp0087827	GH13_11	8.5e-13	49	0.4	1.8e-12	48	0.4	ID=FBpp0087827;	name=Mal-A4-PA;	parent=FBgn0033294,FBtr0088748;
FBpp0087838	GH13_11	4.3e-12	46.7	0.3	1.7e-11	44.7	0.3	ID=FBpp0087838;	name=Mal-A1-PA;	parent=FBgn0002570,FBtr0088759;
FBpp0079859	GH13_11	2.1e-11	44.4	0.4	3.5e-11	43.7	0.1	ID=FBpp0079859;	name=Mal-B1-PA;	parent=FBgn0032381,FBtr0080275;
FBpp0308388	GH13_11	5.9e-11	43	0	1.7e-10	41.5	0	ID=FBpp0308388;	name=Mal-A5-PC;	parent=FBgn0050359,FBtr0339279;
FBpp0087828	GH13_11	6.2e-11	42.9	0	1.8e-10	41.4	0	ID=FBpp0087828;	name=Mal-A5-PA;	parent=FBgn0050359,FBtr0088749;
FBpp0087837	GH13_11	1.7e-09	38.2	0	3.7e-09	37.1	0	ID=FBpp0087837;	name=Mal-A3-PA;	parent=FBgn0002571,FBtr0088758;
FBpp0290175	GH13_11	5e-06	26.8	0	1.7e-05	25.1	0	ID=FBpp0290175;	name=Mal-A5-PB;	parent=FBgn0050359,FBtr0300953;
FBpp0087826	GH13_12	5.5e-19	69.7	0.1	4.7e-18	66.6	0	ID=FBpp0087826;	name=Mal-A2-PA;	parent=FBgn0002569,FBtr0088747;
FBpp0271830	GH13_12	1.2e-17	65.3	0.1	5.4e-17	63.1	0.1	ID=FBpp0271830;	name=Mal-A6-PC;	parent=FBgn0050360,FBtr0273322;
FBpp0312227	GH13_12	1.2e-17	65.3	0.1	5.4e-17	63.1	0.1	ID=FBpp0312227;	name=Mal-A6-PD;	parent=FBgn0050360,FBtr0346647;
FBpp0087827	GH13_12	1.7e-16	61.5	0	6.1e-16	59.7	0	ID=FBpp0087827;	name=Mal-A4-PA;	parent=FBgn0033294,FBtr0088748;
FBpp0086263	GH13_12	6.2e-15	56.4	0	9.1e-15	55.8	0	ID=FBpp0086263;	name=Amyrel-PA;	parent=FBgn0020506,FBtr0087117;
FBpp0087831	GH13_12	1.1e-14	55.5	0	4.4e-14	53.6	0	ID=FBpp0087831;	name=Mal-A8-PA;	parent=FBgn0033297,FBtr0088752;
FBpp0079859	GH13_12	3.5e-14	53.9	0	7.1e-14	52.9	0	ID=FBpp0079859;	name=Mal-B1-PA;	parent=FBgn0032381,FBtr0080275;
FBpp0086155	GH13_12	4.6e-14	53.5	0	8.4e-14	52.7	0	ID=FBpp0086155;	name=Amy-p-PA;	parent=FBgn0000079,FBtr0087004;
FBpp0311627	GH13_12	4.6e-14	53.5	0	8.4e-14	52.7	0	ID=FBpp0311627;	name=Amy-p-PB;	parent=FBgn0000079,FBtr0345521;
FBpp0086136	GH13_12	4.7e-14	53.5	0	8.4e-14	52.7	0	ID=FBpp0086136;	name=Amy-d-PA;	parent=FBgn0000078,FBtr0086983;
FBpp0308388	GH13_12	4.4e-13	50.3	0	1.5e-12	48.6	0	ID=FBpp0308388;	name=Mal-A5-PC;	parent=FBgn0050359,FBtr0339279;
FBpp0087836	GH13_12	4.5e-13	50.3	0	1.4e-12	48.6	0	ID=FBpp0087836;	name=Mal-A7-PA;	parent=FBgn0033296,FBtr0088757;
FBpp0311600	GH13_12	4.5e-13	50.3	0	1.4e-12	48.6	0	ID=FBpp0311600;	name=Mal-A7-PB;	parent=FBgn0033296,FBtr0345489;
FBpp0087838	GH13_12	4.8e-13	50.2	0.1	1.9e-12	48.2	0	ID=FBpp0087838;	name=Mal-A1-PA;	parent=FBgn0002570,FBtr0088759;
FBpp0087828	GH13_12	5.1e-13	50.1	0	1.6e-12	48.5	0	ID=FBpp0087828;	name=Mal-A5-PA;	parent=FBgn0050359,FBtr0088749;
FBpp0087837	GH13_12	1e-12	49.1	0	2.5e-12	47.8	0	ID=FBpp0087837;	name=Mal-A3-PA;	parent=FBgn0002571,FBtr0088758;
FBpp0079860	GH13_12	1.8e-12	48.3	0	6.3e-12	46.5	0	ID=FBpp0079860;	name=Mal-B2-PA;	parent=FBgn0032382,FBtr0080276;
FBpp0423050	GH13_12	1.9e-12	48.2	0	7.1e-12	46.4	0	ID=FBpp0423050;	name=Mal-B2-PE;	parent=FBgn0032382,FBtr0473587;
FBpp0423051	GH13_12	1.9e-12	48.2	0	7.1e-12	46.4	0	ID=FBpp0423051;	name=Mal-B2-PF;	parent=FBgn0032382,FBtr0473588;
FBpp0086845	GH13_12	1.5e-10	42	0.1	3.6e-10	40.7	0	ID=FBpp0086845;	name=AGBE-PA;	parent=FBgn0053138,FBtr0087732;
FBpp0290175	GH13_12	1.5e-08	35.4	0	4.8e-08	33.8	0	ID=FBpp0290175;	name=Mal-A5-PB;	parent=FBgn0050359,FBtr0300953;
FBpp0086155	GH13_13	2.2e-22	80.4	0.1	3.7e-20	73	0	ID=FBpp0086155;	name=Amy-p-PA;	parent=FBgn0000079,FBtr0087004;
FBpp0311627	GH13_13	2.2e-22	80.4	0.1	3.7e-20	73	0	ID=FBpp0311627;	name=Amy-p-PB;	parent=FBgn0000079,FBtr0345521;
FBpp0086136	GH13_13	2.2e-22	80.4	0.1	3.5e-20	73.1	0	ID=FBpp0086136;	name=Amy-d-PA;	parent=FBgn0000078,FBtr0086983;
FBpp0086263	GH13_13	2.9e-20	73.4	0.3	4.7e-17	62.9	0	ID=FBpp0086263;	name=Amyrel-PA;	parent=FBgn0020506,FBtr0087117;
FBpp0079860	GH13_13	6.8e-20	72.2	0.2	3.6e-17	63.2	0.2	ID=FBpp0079860;	name=Mal-B2-PA;	parent=FBgn0032382,FBtr0080276;
FBpp0423050	GH13_13	7.5e-20	72	0.2	3.8e-17	63.1	0.2	ID=FBpp0423050;	name=Mal-B2-PE;	parent=FBgn0032382,FBtr0473587;
FBpp0423051	GH13_13	7.5e-20	72	0.2	3.8e-17	63.1	0.2	ID=FBpp0423051;	name=Mal-B2-PF;	parent=FBgn0032382,FBtr0473588;
FBpp0087836	GH13_13	6.3e-17	62.4	0.1	5.8e-14	52.7	0.1	ID=FBpp0087836;	name=Mal-A7-PA;	parent=FBgn0033296,FBtr0088757;
FBpp0311600	GH13_13	6.3e-17	62.4	0.1	5.8e-14	52.7	0.1	ID=FBpp0311600;	name=Mal-A7-PB;	parent=FBgn0033296,FBtr0345489;
FBpp0079859	GH13_13	1e-16	61.7	0	6.6e-14	52.5	0	ID=FBpp0079859;	name=Mal-B1-PA;	parent=FBgn0032381,FBtr0080275;
FBpp0087826	GH13_13	1e-16	61.7	3.1	1.5e-14	54.6	0.1	ID=FBpp0087826;	name=Mal-A2-PA;	parent=FBgn0002569,FBtr0088747;
FBpp0087838	GH13_13	3.5e-16	60	0.5	1.1e-13	51.7	0.1	ID=FBpp0087838;	name=Mal-A1-PA;	parent=FBgn0002570,FBtr0088759;
FBpp0087827	GH13_13	9.1e-16	58.6	0.2	1.1e-13	51.8	0.1	ID=FBpp0087827;	name=Mal-A4-PA;	parent=FBgn0033294,FBtr0088748;
FBpp0087831	GH13_13	2.1e-15	57.4	0.1	1.4e-12	48.1	0.1	ID=FBpp0087831;	name=Mal-A8-PA;	parent=FBgn0033297,FBtr0088752;
FBpp0271830	GH13_13	7.3e-15	55.6	0.2	1.4e-12	48.1	0.2	ID=FBpp0271830;	name=Mal-A6-PC;	parent=FBgn0050360,FBtr0273322;
FBpp0312227	GH13_13	7.3e-15	55.6	0.2	1.4e-12	48.1	0.2	ID=FBpp0312227;	name=Mal-A6-PD;	parent=FBgn0050360,FBtr0346647;
FBpp0087837	GH13_13	8.2e-13	48.9	0.4	1.5e-10	41.4	0	ID=FBpp0087837;	name=Mal-A3-PA;	parent=FBgn0002571,FBtr0088758;
FBpp0308388	GH13_13	1.1e-12	48.4	0	3.9e-10	40.1	0	ID=FBpp0308388;	name=Mal-A5-PC;	parent=FBgn0050359,FBtr0339279;
FBpp0086845	GH13_13	1.2e-12	48.3	1.1	1.2e-12	48.3	1.1	ID=FBpp0086845;	name=AGBE-PA;	parent=FBgn0053138,FBtr0087732;
FBpp0087828	GH13_13	1.2e-12	48.3	0	4.1e-10	40	0	ID=FBpp0087828;	name=Mal-A5-PA;	parent=FBgn0050359,FBtr0088749;
FBpp0290175	GH13_13	1.3e-10	41.7	0.1	3.4e-10	40.3	0	ID=FBpp0290175;	name=Mal-A5-PB;	parent=FBgn0050359,FBtr0300953;
FBpp0087826	GH13_14	1.5e-26	94.2	6.1	1.7e-23	84.1	0.1	ID=FBpp0087826;	name=Mal-A2-PA;	parent=FBgn0002569,FBtr0088747;
FBpp0271830	GH13_14	7.8e-26	91.8	1.8	6.8e-23	82.2	0.3	ID=FBpp0271830;	name=Mal-A6-PC;	parent=FBgn0050360,FBtr0273322;
FBpp0312227	GH13_14	7.8e-26	91.8	1.8	6.8e-23	82.2	0.3	ID=FBpp0312227;	name=Mal-A6-PD;	parent=FBgn0050360,FBtr0346647;
FBpp0079860	GH13_14	1.7e-25	90.7	0	7.8e-25	88.5	0	ID=FBpp0079860;	name=Mal-B2-PA;	parent=FBgn0032382,FBtr0080276;
FBpp0086263	GH13_14	1.8e-25	90.6	0	2.5e-25	90.1	0	ID=FBpp0086263;	name=Amyrel-PA;	parent=FBgn0020506,FBtr0087117;
FBpp0423050	GH13_14	2e-25	90.5	0	8.6e-25	88.4	0	ID=FBpp0423050;	name=Mal-B2-PE;	parent=FBgn0032382,FBtr0473587;
FBpp0423051	GH13_14	2e-25	90.5	0	8.6e-25	88.4	0	ID=FBpp0423051;	name=Mal-B2-PF;	parent=FBgn0032382,FBtr0473588;
FBpp0086136	GH13_14	3.2e-23	83.2	0	4.5e-23	82.7	0	ID=FBpp0086136;	name=Amy-d-PA;	parent=FBgn0000078,FBtr0086983;
FBpp0086155	GH13_14	3.2e-23	83.2	0	4.5e-23	82.7	0	ID=FBpp0086155;	name=Amy-p-PA;	parent=FBgn0000079,FBtr0087004;
FBpp0311627	GH13_14	3.2e-23	83.2	0	4.5e-23	82.7	0	ID=FBpp0311627;	name=Amy-p-PB;	parent=FBgn0000079,FBtr0345521;
FBpp0087827	GH13_14	5.5e-23	82.5	1	1e-20	75	0	ID=FBpp0087827;	name=Mal-A4-PA;	parent=FBgn0033294,FBtr0088748;
FBpp0079859	GH13_14	6.8e-23	82.2	1.1	3.1e-20	73.4	0.4	ID=FBpp0079859;	name=Mal-B1-PA;	parent=FBgn0032381,FBtr0080275;
FBpp0087836	GH13_14	1.1e-22	81.5	0.1	4.6e-21	76.1	0.1	ID=FBpp0087836;	name=Mal-A7-PA;	parent=FBgn0033296,FBtr0088757;
FBpp0311600	GH13_14	1.1e-22	81.5	0.1	4.6e-21	76.1	0.1	ID=FBpp0311600;	name=Mal-A7-PB;	parent=FBgn0033296,FBtr0345489;
FBpp0308388	GH13_14	1.2e-21	78.1	0.2	1.6e-19	71.1	0	ID=FBpp0308388;	name=Mal-A5-PC;	parent=FBgn0050359,FBtr0339279;
FBpp0087828	GH13_14	1.4e-21	77.9	0.3	2e-19	70.8	0	ID=FBpp0087828;	name=Mal-A5-PA;	parent=FBgn0050359,FBtr0088749;
FBpp0087838	GH13_14	1.5e-21	77.7	3.8	8.9e-21	75.2	3.8	ID=FBpp0087838;	name=Mal-A1-PA;	parent=FBgn0002570,FBtr0088759;
FBpp0087831	GH13_14	2.2e-21	77.2	0.1	3.9e-20	73.1	0.1	ID=FBpp0087831;	name=Mal-A8-PA;	parent=FBgn0033297,FBtr0088752;
FBpp0087837	GH13_14	6.9e-17	62.4	1.3	1.1e-15	58.5	0.1	ID=FBpp0087837;	name=Mal-A3-PA;	parent=FBgn0002571,FBtr0088758;
FBpp0290175	GH13_14	2.1e-14	54.3	1.2	2.4e-12	47.5	0	ID=FBpp0290175;	name=Mal-A5-PB;	parent=FBgn0050359,FBtr0300953;
FBpp0086845	GH13_14	7.4e-12	45.9	0.9	8e-11	42.5	0.4	ID=FBpp0086845;	name=AGBE-PA;	parent=FBgn0053138,FBtr0087732;
FBpp0086155	GH13_15	4.3e-145	483.2	0.1	6.3e-145	482.6	0.1	ID=FBpp0086155;	name=Amy-p-PA;	parent=FBgn0000079,FBtr0087004;
FBpp0311627	GH13_15	4.3e-145	483.2	0.1	6.3e-145	482.6	0.1	ID=FBpp0311627;	name=Amy-p-PB;	parent=FBgn0000079,FBtr0345521;
FBpp0086136	GH13_15	4.6e-145	483.1	0.1	6.3e-145	482.6	0.1	ID=FBpp0086136;	name=Amy-d-PA;	parent=FBgn0000078,FBtr0086983;
FBpp0086263	GH13_15	4.4e-142	473.3	0	5.8e-142	472.9	0	ID=FBpp0086263;	name=Amyrel-PA;	parent=FBgn0020506,FBtr0087117;
FBpp0087838	GH13_15	3.5e-10	40.4	0.1	6.6e-09	36.3	0	ID=FBpp0087838;	name=Mal-A1-PA;	parent=FBgn0002570,FBtr0088759;
FBpp0087826	GH13_15	1.7e-09	38.2	0.1	3e-05	24.3	0	ID=FBpp0087826;	name=Mal-A2-PA;	parent=FBgn0002569,FBtr0088747;
FBpp0087827	GH13_15	1.8e-09	38.2	0	1.6e-08	35	0	ID=FBpp0087827;	name=Mal-A4-PA;	parent=FBgn0033294,FBtr0088748;
FBpp0079860	GH13_15	1.7e-08	35	0	0.0007	19.8	0	ID=FBpp0079860;	name=Mal-B2-PA;	parent=FBgn0032382,FBtr0080276;
FBpp0423050	GH13_15	1.9e-08	34.8	0	0.00073	19.7	0	ID=FBpp0423050;	name=Mal-B2-PE;	parent=FBgn0032382,FBtr0473587;
FBpp0423051	GH13_15	1.9e-08	34.8	0	0.00073	19.7	0	ID=FBpp0423051;	name=Mal-B2-PF;	parent=FBgn0032382,FBtr0473588;
FBpp0087836	GH13_15	1.1e-06	29	0	1.2e-05	25.6	0	ID=FBpp0087836;	name=Mal-A7-PA;	parent=FBgn0033296,FBtr0088757;
FBpp0311600	GH13_15	1.1e-06	29	0	1.2e-05	25.6	0	ID=FBpp0311600;	name=Mal-A7-PB;	parent=FBgn0033296,FBtr0345489;
FBpp0290175	GH13_15	1.6e-06	28.4	0	9.1e-06	26	0	ID=FBpp0290175;	name=Mal-A5-PB;	parent=FBgn0050359,FBtr0300953;
FBpp0079859	GH13_15	1.6e-06	28.4	0	0.046	13.8	0	ID=FBpp0079859;	name=Mal-B1-PA;	parent=FBgn0032381,FBtr0080275;
FBpp0087828	GH13_15	2.3e-06	27.9	0	1.2e-05	25.6	0	ID=FBpp0087828;	name=Mal-A5-PA;	parent=FBgn0050359,FBtr0088749;
FBpp0308388	GH13_15	2.7e-06	27.7	0	1.3e-05	25.5	0	ID=FBpp0308388;	name=Mal-A5-PC;	parent=FBgn0050359,FBtr0339279;
FBpp0087826	GH13_16	2e-73	248.3	5	3.1e-67	227.9	2.4	ID=FBpp0087826;	name=Mal-A2-PA;	parent=FBgn0002569,FBtr0088747;
FBpp0087838	GH13_16	6.8e-72	243.3	6.2	3.5e-63	214.6	2.6	ID=FBpp0087838;	name=Mal-A1-PA;	parent=FBgn0002570,FBtr0088759;
FBpp0079860	GH13_16	3.9e-71	240.8	5.7	3.2e-66	224.6	1.8	ID=FBpp0079860;	name=Mal-B2-PA;	parent=FBgn0032382,FBtr0080276;
FBpp0423050	GH13_16	4.5e-71	240.6	5.7	3.4e-66	224.5	1.8	ID=FBpp0423050;	name=Mal-B2-PE;	parent=FBgn0032382,FBtr0473587;
FBpp0423051	GH13_16	4.5e-71	240.6	5.7	3.4e-66	224.5	1.8	ID=FBpp0423051;	name=Mal-B2-PF;	parent=FBgn0032382,FBtr0473588;
FBpp0087827	GH13_16	2.5e-70	238.1	3.7	2.8e-62	211.6	0.6	ID=FBpp0087827;	name=Mal-A4-PA;	parent=FBgn0033294,FBtr0088748;
FBpp0308388	GH13_16	6.3e-70	236.8	1.3	1.1e-60	206.4	0.2	ID=FBpp0308388;	name=Mal-A5-PC;	parent=FBgn0050359,FBtr0339279;
FBpp0087828	GH13_16	7.1e-70	236.6	1.3	1.1e-60	206.3	0.2	ID=FBpp0087828;	name=Mal-A5-PA;	parent=FBgn0050359,FBtr0088749;
FBpp0087837	GH13_16	1.2e-69	235.8	2.4	3.7e-64	217.8	0.3	ID=FBpp0087837;	name=Mal-A3-PA;	parent=FBgn0002571,FBtr0088758;
FBpp0087831	GH13_16	8e-69	233.2	3.1	4e-62	211.1	0.3	ID=FBpp0087831;	name=Mal-A8-PA;	parent=FBgn0033297,FBtr0088752;
FBpp0087836	GH13_16	1.9e-68	231.9	1.9	5.1e-64	217.4	0.2	ID=FBpp0087836;	name=Mal-A7-PA;	parent=FBgn0033296,FBtr0088757;
FBpp0311600	GH13_16	1.9e-68	231.9	1.9	5.1e-64	217.4	0.2	ID=FBpp0311600;	name=Mal-A7-PB;	parent=FBgn0033296,FBtr0345489;
FBpp0271830	GH13_16	5.4e-68	230.4	7.7	1.7e-64	219	1.6	ID=FBpp0271830;	name=Mal-A6-PC;	parent=FBgn0050360,FBtr0273322;
FBpp0312227	GH13_16	5.4e-68	230.4	7.7	1.7e-64	219	1.6	ID=FBpp0312227;	name=Mal-A6-PD;	parent=FBgn0050360,FBtr0346647;
FBpp0079859	GH13_16	3.2e-67	227.9	4.8	3.8e-63	214.5	0.7	ID=FBpp0079859;	name=Mal-B1-PA;	parent=FBgn0032381,FBtr0080275;
FBpp0290175	GH13_16	3.1e-54	185.2	4.3	2.6e-45	155.8	1.7	ID=FBpp0290175;	name=Mal-A5-PB;	parent=FBgn0050359,FBtr0300953;
FBpp0086155	GH13_16	2.7e-08	34.1	0	0.00011	22.2	0	ID=FBpp0086155;	name=Amy-p-PA;	parent=FBgn0000079,FBtr0087004;
FBpp0311627	GH13_16	2.7e-08	34.1	0	0.00011	22.2	0	ID=FBpp0311627;	name=Amy-p-PB;	parent=FBgn0000079,FBtr0345521;
FBpp0086136	GH13_16	2.7e-08	34.1	0	0.00011	22.2	0	ID=FBpp0086136;	name=Amy-d-PA;	parent=FBgn0000078,FBtr0086983;
FBpp0086263	GH13_16	9.9e-08	32.2	0	0.0025	17.8	0	ID=FBpp0086263;	name=Amyrel-PA;	parent=FBgn0020506,FBtr0087117;
FBpp0086845	GH13_16	2.7e-07	30.8	0.1	9e-06	25.8	0	ID=FBpp0086845;	name=AGBE-PA;	parent=FBgn0053138,FBtr0087732;
FBpp0303762	GH13_16	5.6e-06	26.5	0	1e-05	25.6	0	ID=FBpp0303762;	name=CD98hc-PD;	parent=FBgn0037533,FBtr0331344;
FBpp0081314	GH13_16	5.6e-06	26.5	0	1e-05	25.6	0	ID=FBpp0081314;	name=CD98hc-PA;	parent=FBgn0037533,FBtr0081824;
FBpp0303760	GH13_16	5.6e-06	26.5	0	1e-05	25.6	0	ID=FBpp0303760;	name=CD98hc-PB;	parent=FBgn0037533,FBtr0331342;
FBpp0428086	GH13_16	6.7e-06	26.2	0	1.2e-05	25.3	0	ID=FBpp0428086;	name=CD98hc-PG;	parent=FBgn0037533,FBtr0479743;
FBpp0308388	GH13_17	5.6e-170	565.9	0.2	7.6e-170	565.5	0.2	ID=FBpp0308388;	name=Mal-A5-PC;	parent=FBgn0050359,FBtr0339279;
FBpp0087828	GH13_17	5.8e-170	565.8	0.2	8.2e-170	565.3	0.2	ID=FBpp0087828;	name=Mal-A5-PA;	parent=FBgn0050359,FBtr0088749;
FBpp0271830	GH13_17	2.7e-169	563.6	3.6	3.4e-169	563.3	3.6	ID=FBpp0271830;	name=Mal-A6-PC;	parent=FBgn0050360,FBtr0273322;
FBpp0312227	GH13_17	2.7e-169	563.6	3.6	3.4e-169	563.3	3.6	ID=FBpp0312227;	name=Mal-A6-PD;	parent=FBgn0050360,FBtr0346647;
FBpp0087838	GH13_17	4.4e-169	563	8.4	5.5e-169	562.6	8.4	ID=FBpp0087838;	name=Mal-A1-PA;	parent=FBgn0002570,FBtr0088759;
FBpp0087831	GH13_17	8.5e-167	555.4	0.9	1.1e-166	555.1	0.9	ID=FBpp0087831;	name=Mal-A8-PA;	parent=FBgn0033297,FBtr0088752;
FBpp0079859	GH13_17	9.8e-167	555.2	2.5	1.9e-166	554.3	2.4	ID=FBpp0079859;	name=Mal-B1-PA;	parent=FBgn0032381,FBtr0080275;
FBpp0079860	GH13_17	2.4e-166	553.9	1.8	3.1e-166	553.6	1.8	ID=FBpp0079860;	name=Mal-B2-PA;	parent=FBgn0032382,FBtr0080276;
FBpp0423050	GH13_17	2.7e-166	553.8	1.8	3.4e-166	553.4	1.8	ID=FBpp0423050;	name=Mal-B2-PE;	parent=FBgn0032382,FBtr0473587;
FBpp0423051	GH13_17	2.7e-166	553.8	1.8	3.4e-166	553.4	1.8	ID=FBpp0423051;	name=Mal-B2-PF;	parent=FBgn0032382,FBtr0473588;
FBpp0087837	GH13_17	7e-166	552.4	0.1	8.8e-166	552.1	0.1	ID=FBpp0087837;	name=Mal-A3-PA;	parent=FBgn0002571,FBtr0088758;
FBpp0087827	GH13_17	8.1e-166	552.2	3.3	1e-165	551.9	3.3	ID=FBpp0087827;	name=Mal-A4-PA;	parent=FBgn0033294,FBtr0088748;
FBpp0087836	GH13_17	1.9e-163	544.4	0.2	2.4e-163	544.1	0.2	ID=FBpp0087836;	name=Mal-A7-PA;	parent=FBgn0033296,FBtr0088757;
FBpp0311600	GH13_17	1.9e-163	544.4	0.2	2.4e-163	544.1	0.2	ID=FBpp0311600;	name=Mal-A7-PB;	parent=FBgn0033296,FBtr0345489;
FBpp0087826	GH13_17	1.7e-159	531.4	5.8	2.4e-159	530.9	5.8	ID=FBpp0087826;	name=Mal-A2-PA;	parent=FBgn0002569,FBtr0088747;
FBpp0290175	GH13_17	4.2e-152	507.1	0.7	6e-152	506.6	0.7	ID=FBpp0290175;	name=Mal-A5-PB;	parent=FBgn0050359,FBtr0300953;
FBpp0081314	GH13_17	5.2e-18	66.1	0	8.1e-18	65.5	0	ID=FBpp0081314;	name=CD98hc-PA;	parent=FBgn0037533,FBtr0081824;
FBpp0303760	GH13_17	5.2e-18	66.1	0	8.1e-18	65.5	0	ID=FBpp0303760;	name=CD98hc-PB;	parent=FBgn0037533,FBtr0331342;
FBpp0303762	GH13_17	5.3e-18	66.1	0	8.1e-18	65.5	0	ID=FBpp0303762;	name=CD98hc-PD;	parent=FBgn0037533,FBtr0331344;
FBpp0428086	GH13_17	6.6e-18	65.7	0	1e-17	65.1	0	ID=FBpp0428086;	name=CD98hc-PG;	parent=FBgn0037533,FBtr0479743;
FBpp0086845	GH13_17	6.4e-07	29.6	8.3	3.1e-06	27.4	0	ID=FBpp0086845;	name=AGBE-PA;	parent=FBgn0053138,FBtr0087732;
FBpp0086155	GH13_17	2.1e-06	27.9	0	0.003	17.5	0	ID=FBpp0086155;	name=Amy-p-PA;	parent=FBgn0000079,FBtr0087004;
FBpp0311627	GH13_17	2.1e-06	27.9	0	0.003	17.5	0	ID=FBpp0311627;	name=Amy-p-PB;	parent=FBgn0000079,FBtr0345521;
FBpp0086136	GH13_17	2.1e-06	27.9	0	0.003	17.5	0	ID=FBpp0086136;	name=Amy-d-PA;	parent=FBgn0000078,FBtr0086983;
FBpp0087838	GH13_18	9.1e-26	91.5	2.1	4.5e-22	79.3	0.5	ID=FBpp0087838;	name=Mal-A1-PA;	parent=FBgn0002570,FBtr0088759;
FBpp0087837	GH13_18	1.2e-24	87.7	0.2	4.3e-21	76.1	0.1	ID=FBpp0087837;	name=Mal-A3-PA;	parent=FBgn0002571,FBtr0088758;
FBpp0308388	GH13_18	2.1e-24	87	0.3	3e-20	73.3	0.1	ID=FBpp0308388;	name=Mal-A5-PC;	parent=FBgn0050359,FBtr0339279;
FBpp0087828	GH13_18	2.2e-24	86.9	0.3	3.1e-20	73.2	0.1	ID=FBpp0087828;	name=Mal-A5-PA;	parent=FBgn0050359,FBtr0088749;
FBpp0079860	GH13_18	3.8e-24	86.1	0.1	7.7e-24	85.1	0.1	ID=FBpp0079860;	name=Mal-B2-PA;	parent=FBgn0032382,FBtr0080276;
FBpp0423050	GH13_18	4.1e-24	86	0.1	8.2e-24	85	0.1	ID=FBpp0423050;	name=Mal-B2-PE;	parent=FBgn0032382,FBtr0473587;
FBpp0423051	GH13_18	4.1e-24	86	0.1	8.2e-24	85	0.1	ID=FBpp0423051;	name=Mal-B2-PF;	parent=FBgn0032382,FBtr0473588;
FBpp0087827	GH13_18	5.9e-24	85.5	0.7	6.6e-21	75.5	0.1	ID=FBpp0087827;	name=Mal-A4-PA;	parent=FBgn0033294,FBtr0088748;
FBpp0290175	GH13_18	1.3e-23	84.3	0.2	3e-19	70	0	ID=FBpp0290175;	name=Mal-A5-PB;	parent=FBgn0050359,FBtr0300953;
FBpp0087831	GH13_18	1.5e-22	80.9	0.1	5.2e-19	69.2	0	ID=FBpp0087831;	name=Mal-A8-PA;	parent=FBgn0033297,FBtr0088752;
FBpp0087826	GH13_18	7.8e-22	78.5	3.2	1.9e-19	70.7	0.8	ID=FBpp0087826;	name=Mal-A2-PA;	parent=FBgn0002569,FBtr0088747;
FBpp0271830	GH13_18	1e-20	74.8	0.5	3.3e-20	73.2	0.3	ID=FBpp0271830;	name=Mal-A6-PC;	parent=FBgn0050360,FBtr0273322;
FBpp0312227	GH13_18	1e-20	74.8	0.5	3.3e-20	73.2	0.3	ID=FBpp0312227;	name=Mal-A6-PD;	parent=FBgn0050360,FBtr0346647;
FBpp0087836	GH13_18	1.2e-20	74.6	0.1	1.9e-18	67.4	0.1	ID=FBpp0087836;	name=Mal-A7-PA;	parent=FBgn0033296,FBtr0088757;
FBpp0311600	GH13_18	1.2e-20	74.6	0.1	1.9e-18	67.4	0.1	ID=FBpp0311600;	name=Mal-A7-PB;	parent=FBgn0033296,FBtr0345489;
FBpp0079859	GH13_18	1.4e-20	74.4	0	2.4e-20	73.6	0	ID=FBpp0079859;	name=Mal-B1-PA;	parent=FBgn0032381,FBtr0080275;
FBpp0079860	GH13_19	2.9e-18	66.9	0.8	4.5e-13	49.8	0.1	ID=FBpp0079860;	name=Mal-B2-PA;	parent=FBgn0032382,FBtr0080276;
FBpp0423050	GH13_19	3.1e-18	66.8	0.7	4.7e-13	49.7	0.1	ID=FBpp0423050;	name=Mal-B2-PE;	parent=FBgn0032382,FBtr0473587;
FBpp0423051	GH13_19	3.1e-18	66.8	0.7	4.7e-13	49.7	0.1	ID=FBpp0423051;	name=Mal-B2-PF;	parent=FBgn0032382,FBtr0473588;
FBpp0087827	GH13_19	8.6e-17	62	1.9	6.1e-13	49.4	0.1	ID=FBpp0087827;	name=Mal-A4-PA;	parent=FBgn0033294,FBtr0088748;
FBpp0079859	GH13_19	3.9e-16	59.9	1.2	5.4e-13	49.5	0	ID=FBpp0079859;	name=Mal-B1-PA;	parent=FBgn0032381,FBtr0080275;
FBpp0087826	GH13_19	1.9e-15	57.6	5.5	7e-11	42.6	0.2	ID=FBpp0087826;	name=Mal-A2-PA;	parent=FBgn0002569,FBtr0088747;
FBpp0087831	GH13_19	6.3e-15	55.9	0.8	4.2e-13	49.9	0.4	ID=FBpp0087831;	name=Mal-A8-PA;	parent=FBgn0033297,FBtr0088752;
FBpp0087836	GH13_19	7e-15	55.8	0.9	4.1e-12	46.7	0.1	ID=FBpp0087836;	name=Mal-A7-PA;	parent=FBgn0033296,FBtr0088757;
FBpp0311600	GH13_19	7e-15	55.8	0.9	4.1e-12	46.7	0.1	ID=FBpp0311600;	name=Mal-A7-PB;	parent=FBgn0033296,FBtr0345489;
FBpp0087838	GH13_19	2.1e-14	54.2	7.6	8.6e-13	48.9	2.3	ID=FBpp0087838;	name=Mal-A1-PA;	parent=FBgn0002570,FBtr0088759;
FBpp0271830	GH13_19	9.8e-14	52	5.6	3.9e-13	50	1	ID=FBpp0271830;	name=Mal-A6-PC;	parent=FBgn0050360,FBtr0273322;
FBpp0312227	GH13_19	9.8e-14	52	5.6	3.9e-13	50	1	ID=FBpp0312227;	name=Mal-A6-PD;	parent=FBgn0050360,FBtr0346647;
FBpp0308388	GH13_19	1e-12	48.6	0.2	1.4e-09	38.3	0	ID=FBpp0308388;	name=Mal-A5-PC;	parent=FBgn0050359,FBtr0339279;
FBpp0087828	GH13_19	1.1e-12	48.6	0.1	1.9e-09	37.9	0	ID=FBpp0087828;	name=Mal-A5-PA;	parent=FBgn0050359,FBtr0088749;
FBpp0087837	GH13_19	4.5e-12	46.5	0.4	4.2e-09	36.7	0	ID=FBpp0087837;	name=Mal-A3-PA;	parent=FBgn0002571,FBtr0088758;
FBpp0086845	GH13_19	5.5e-10	39.7	4.7	5.3e-08	33.1	0.4	ID=FBpp0086845;	name=AGBE-PA;	parent=FBgn0053138,FBtr0087732;
FBpp0086263	GH13_19	2e-08	34.5	0.5	0.0032	17.4	0	ID=FBpp0086263;	name=Amyrel-PA;	parent=FBgn0020506,FBtr0087117;
FBpp0290175	GH13_19	9.5e-08	32.3	0.2	0.00015	21.8	0	ID=FBpp0290175;	name=Mal-A5-PB;	parent=FBgn0050359,FBtr0300953;
FBpp0086155	GH13_19	5.6e-07	29.7	0	0.0072	16.2	0	ID=FBpp0086155;	name=Amy-p-PA;	parent=FBgn0000079,FBtr0087004;
FBpp0311627	GH13_19	5.6e-07	29.7	0	0.0072	16.2	0	ID=FBpp0311627;	name=Amy-p-PB;	parent=FBgn0000079,FBtr0345521;
FBpp0086136	GH13_19	5.7e-07	29.7	0	0.0072	16.2	0	ID=FBpp0086136;	name=Amy-d-PA;	parent=FBgn0000078,FBtr0086983;
FBpp0086263	GH13_1	7.3e-26	91.7	0	9.9e-26	91.3	0	ID=FBpp0086263;	name=Amyrel-PA;	parent=FBgn0020506,FBtr0087117;
FBpp0087826	GH13_1	5e-25	89	0	3e-24	86.4	0	ID=FBpp0087826;	name=Mal-A2-PA;	parent=FBgn0002569,FBtr0088747;
FBpp0271830	GH13_1	1.3e-24	87.6	0.3	1.6e-20	74.2	0	ID=FBpp0271830;	name=Mal-A6-PC;	parent=FBgn0050360,FBtr0273322;
FBpp0312227	GH13_1	1.3e-24	87.6	0.3	1.6e-20	74.2	0	ID=FBpp0312227;	name=Mal-A6-PD;	parent=FBgn0050360,FBtr0346647;
FBpp0079859	GH13_1	4.1e-24	86	0	3.9e-23	82.8	0	ID=FBpp0079859;	name=Mal-B1-PA;	parent=FBgn0032381,FBtr0080275;
FBpp0087831	GH13_1	9.3e-24	84.8	0	1.5e-18	67.8	0	ID=FBpp0087831;	name=Mal-A8-PA;	parent=FBgn0033297,FBtr0088752;
FBpp0087836	GH13_1	1.3e-23	84.3	0	2e-17	64	0	ID=FBpp0087836;	name=Mal-A7-PA;	parent=FBgn0033296,FBtr0088757;
FBpp0311600	GH13_1	1.3e-23	84.3	0	2e-17	64	0	ID=FBpp0311600;	name=Mal-A7-PB;	parent=FBgn0033296,FBtr0345489;
FBpp0087838	GH13_1	1.4e-23	84.2	0.5	5.2e-20	72.5	0	ID=FBpp0087838;	name=Mal-A1-PA;	parent=FBgn0002570,FBtr0088759;
FBpp0087837	GH13_1	5.5e-23	82.3	0	3.8e-20	73	0	ID=FBpp0087837;	name=Mal-A3-PA;	parent=FBgn0002571,FBtr0088758;
FBpp0079860	GH13_1	8.2e-23	81.7	0	1.8e-21	77.3	0	ID=FBpp0079860;	name=Mal-B2-PA;	parent=FBgn0032382,FBtr0080276;
FBpp0423050	GH13_1	9.2e-23	81.6	0	1.9e-21	77.2	0	ID=FBpp0423050;	name=Mal-B2-PE;	parent=FBgn0032382,FBtr0473587;
FBpp0423051	GH13_1	9.2e-23	81.6	0	1.9e-21	77.2	0	ID=FBpp0423051;	name=Mal-B2-PF;	parent=FBgn0032382,FBtr0473588;
FBpp0086155	GH13_1	4.2e-22	79.4	0	5.6e-22	79	0	ID=FBpp0086155;	name=Amy-p-PA;	parent=FBgn0000079,FBtr0087004;
FBpp0311627	GH13_1	4.2e-22	79.4	0	5.6e-22	79	0	ID=FBpp0311627;	name=Amy-p-PB;	parent=FBgn0000079,FBtr0345521;
FBpp0086136	GH13_1	4.2e-22	79.4	0	5.6e-22	79	0	ID=FBpp0086136;	name=Amy-d-PA;	parent=FBgn0000078,FBtr0086983;
FBpp0087827	GH13_1	8.3e-22	78.4	0	2.4e-18	67	0	ID=FBpp0087827;	name=Mal-A4-PA;	parent=FBgn0033294,FBtr0088748;
FBpp0308388	GH13_1	8.9e-22	78.3	0	6.2e-18	65.7	0	ID=FBpp0308388;	name=Mal-A5-PC;	parent=FBgn0050359,FBtr0339279;
FBpp0087828	GH13_1	9.7e-22	78.2	0	6.5e-18	65.6	0	ID=FBpp0087828;	name=Mal-A5-PA;	parent=FBgn0050359,FBtr0088749;
FBpp0290175	GH13_1	3e-14	53.6	0	2.4e-10	40.8	0	ID=FBpp0290175;	name=Mal-A5-PB;	parent=FBgn0050359,FBtr0300953;
FBpp0086845	GH13_1	6.5e-09	36.1	0.4	2.1e-07	31.1	0.4	ID=FBpp0086845;	name=AGBE-PA;	parent=FBgn0053138,FBtr0087732;
FBpp0087826	GH13_20	6.1e-48	164.5	2.8	1.9e-39	136.6	0.6	ID=FBpp0087826;	name=Mal-A2-PA;	parent=FBgn0002569,FBtr0088747;
FBpp0271830	GH13_20	1.5e-47	163.2	3	6.9e-40	138	0.9	ID=FBpp0271830;	name=Mal-A6-PC;	parent=FBgn0050360,FBtr0273322;
FBpp0312227	GH13_20	1.5e-47	163.2	3	6.9e-40	138	0.9	ID=FBpp0312227;	name=Mal-A6-PD;	parent=FBgn0050360,FBtr0346647;
FBpp0087831	GH13_20	4.6e-44	151.7	0.3	8e-37	128	0.2	ID=FBpp0087831;	name=Mal-A8-PA;	parent=FBgn0033297,FBtr0088752;
FBpp0079860	GH13_20	2.2e-43	149.5	0.7	3.8e-37	129	0.6	ID=FBpp0079860;	name=Mal-B2-PA;	parent=FBgn0032382,FBtr0080276;
FBpp0423050	GH13_20	2.4e-43	149.4	0.6	4e-37	129	0.5	ID=FBpp0423050;	name=Mal-B2-PE;	parent=FBgn0032382,FBtr0473587;
FBpp0423051	GH13_20	2.4e-43	149.4	0.6	4e-37	129	0.5	ID=FBpp0423051;	name=Mal-B2-PF;	parent=FBgn0032382,FBtr0473588;
FBpp0308388	GH13_20	2.8e-43	149.2	0.3	5.6e-36	125.2	0.1	ID=FBpp0308388;	name=Mal-A5-PC;	parent=FBgn0050359,FBtr0339279;
FBpp0087828	GH13_20	2.9e-43	149.1	0.3	6e-36	125.1	0.1	ID=FBpp0087828;	name=Mal-A5-PA;	parent=FBgn0050359,FBtr0088749;
FBpp0087838	GH13_20	2.8e-42	145.9	4.3	3.6e-41	142.2	4.3	ID=FBpp0087838;	name=Mal-A1-PA;	parent=FBgn0002570,FBtr0088759;
FBpp0087836	GH13_20	3.2e-42	145.7	0.3	7.6e-35	121.5	0.2	ID=FBpp0087836;	name=Mal-A7-PA;	parent=FBgn0033296,FBtr0088757;
FBpp0311600	GH13_20	3.2e-42	145.7	0.3	7.6e-35	121.5	0.2	ID=FBpp0311600;	name=Mal-A7-PB;	parent=FBgn0033296,FBtr0345489;
FBpp0087827	GH13_20	4.1e-42	145.3	0.5	6.3e-36	125	0.4	ID=FBpp0087827;	name=Mal-A4-PA;	parent=FBgn0033294,FBtr0088748;
FBpp0079859	GH13_20	2.8e-41	142.6	2.5	1e-33	117.8	0.2	ID=FBpp0079859;	name=Mal-B1-PA;	parent=FBgn0032381,FBtr0080275;
FBpp0087837	GH13_20	2.1e-39	136.4	0.3	4.2e-34	119	0.1	ID=FBpp0087837;	name=Mal-A3-PA;	parent=FBgn0002571,FBtr0088758;
FBpp0290175	GH13_20	1.1e-28	101.2	1.5	2.1e-21	77.3	0.9	ID=FBpp0290175;	name=Mal-A5-PB;	parent=FBgn0050359,FBtr0300953;
FBpp0071525	GH13_20	9.2e-09	35.8	0	0.0023	18.1	0	ID=FBpp0071525;	name=CG9485-PA;	parent=FBgn0034618,FBtr0071599;
FBpp0289624	GH13_20	9.2e-09	35.8	0	0.0023	18.1	0	ID=FBpp0289624;	name=CG9485-PE;	parent=FBgn0034618,FBtr0300395;
FBpp0302010	GH13_20	9.2e-09	35.8	0	0.0023	18.1	0	ID=FBpp0302010;	name=CG9485-PF;	parent=FBgn0034618,FBtr0310327;
FBpp0071527	GH13_20	9.3e-09	35.8	0	0.0023	18.1	0	ID=FBpp0071527;	name=CG9485-PC;	parent=FBgn0034618,FBtr0071601;
FBpp0289623	GH13_20	9.5e-09	35.8	0	0.0024	18.1	0	ID=FBpp0289623;	name=CG9485-PD;	parent=FBgn0034618,FBtr0300394;
FBpp0071526	GH13_20	1.1e-08	35.6	0	0.0024	18.1	0	ID=FBpp0071526;	name=CG9485-PB;	parent=FBgn0034618,FBtr0071600;
FBpp0086155	GH13_20	3.3e-08	34	0	6e-08	33.2	0	ID=FBpp0086155;	name=Amy-p-PA;	parent=FBgn0000079,FBtr0087004;
FBpp0311627	GH13_20	3.3e-08	34	0	6e-08	33.2	0	ID=FBpp0311627;	name=Amy-p-PB;	parent=FBgn0000079,FBtr0345521;
FBpp0086136	GH13_20	3.3e-08	34	0	6e-08	33.2	0	ID=FBpp0086136;	name=Amy-d-PA;	parent=FBgn0000078,FBtr0086983;
FBpp0086845	GH13_20	9.2e-08	32.6	2	2.1e-05	24.8	0.2	ID=FBpp0086845;	name=AGBE-PA;	parent=FBgn0053138,FBtr0087732;
FBpp0086263	GH13_20	2.4e-07	31.2	0	4e-07	30.4	0	ID=FBpp0086263;	name=Amyrel-PA;	parent=FBgn0020506,FBtr0087117;
FBpp0271830	GH13_21	7e-48	164.4	2.1	5.2e-47	161.5	2.1	ID=FBpp0271830;	name=Mal-A6-PC;	parent=FBgn0050360,FBtr0273322;
FBpp0312227	GH13_21	7e-48	164.4	2.1	5.2e-47	161.5	2.1	ID=FBpp0312227;	name=Mal-A6-PD;	parent=FBgn0050360,FBtr0346647;
FBpp0079860	GH13_21	8.9e-48	164	1.1	1.6e-46	159.9	1.1	ID=FBpp0079860;	name=Mal-B2-PA;	parent=FBgn0032382,FBtr0080276;
FBpp0308388	GH13_21	9.1e-48	164	0.1	3.2e-47	162.2	0.1	ID=FBpp0308388;	name=Mal-A5-PC;	parent=FBgn0050359,FBtr0339279;
FBpp0087828	GH13_21	1e-47	163.8	0.1	3.5e-47	162.1	0.1	ID=FBpp0087828;	name=Mal-A5-PA;	parent=FBgn0050359,FBtr0088749;
FBpp0423050	GH13_21	1e-47	163.8	1.1	1.8e-46	159.7	1.1	ID=FBpp0423050;	name=Mal-B2-PE;	parent=FBgn0032382,FBtr0473587;
FBpp0423051	GH13_21	1e-47	163.8	1.1	1.8e-46	159.7	1.1	ID=FBpp0423051;	name=Mal-B2-PF;	parent=FBgn0032382,FBtr0473588;
FBpp0087838	GH13_21	1e-46	160.6	2	3.9e-46	158.6	2	ID=FBpp0087838;	name=Mal-A1-PA;	parent=FBgn0002570,FBtr0088759;
FBpp0087826	GH13_21	5.6e-46	158.1	4.1	5.3e-45	154.9	3.9	ID=FBpp0087826;	name=Mal-A2-PA;	parent=FBgn0002569,FBtr0088747;
FBpp0087827	GH13_21	6.8e-46	157.8	1.2	6.1e-39	135	0.8	ID=FBpp0087827;	name=Mal-A4-PA;	parent=FBgn0033294,FBtr0088748;
FBpp0087831	GH13_21	9.6e-46	157.4	0.7	7.1e-37	128.2	0.5	ID=FBpp0087831;	name=Mal-A8-PA;	parent=FBgn0033297,FBtr0088752;
FBpp0087837	GH13_21	2.2e-45	156.1	0.1	7.1e-45	154.5	0.1	ID=FBpp0087837;	name=Mal-A3-PA;	parent=FBgn0002571,FBtr0088758;
FBpp0079859	GH13_21	2.4e-44	152.7	0.5	1.3e-43	150.4	0.5	ID=FBpp0079859;	name=Mal-B1-PA;	parent=FBgn0032381,FBtr0080275;
FBpp0087836	GH13_21	5.4e-44	151.6	1.1	4.6e-43	148.6	1.1	ID=FBpp0087836;	name=Mal-A7-PA;	parent=FBgn0033296,FBtr0088757;
FBpp0311600	GH13_21	5.4e-44	151.6	1.1	4.6e-43	148.6	1.1	ID=FBpp0311600;	name=Mal-A7-PB;	parent=FBgn0033296,FBtr0345489;
FBpp0290175	GH13_21	4.2e-33	115.8	0.2	1.7e-32	113.9	0.2	ID=FBpp0290175;	name=Mal-A5-PB;	parent=FBgn0050359,FBtr0300953;
FBpp0087827	GH13_22	4.1e-08	33.6	0.3	6.1e-07	29.8	0	ID=FBpp0087827;	name=Mal-A4-PA;	parent=FBgn0033294,FBtr0088748;
FBpp0271830	GH13_22	9.4e-08	32.4	0.3	2.8e-07	30.9	0.1	ID=FBpp0271830;	name=Mal-A6-PC;	parent=FBgn0050360,FBtr0273322;
FBpp0312227	GH13_22	9.4e-08	32.4	0.3	2.8e-07	30.9	0.1	ID=FBpp0312227;	name=Mal-A6-PD;	parent=FBgn0050360,FBtr0346647;
FBpp0087826	GH13_22	6.4e-06	26.4	0.2	0.00014	22	0	ID=FBpp0087826;	name=Mal-A2-PA;	parent=FBgn0002569,FBtr0088747;
FBpp0079860	GH13_23	2e-113	380.2	2.7	2.7e-113	379.8	2.7	ID=FBpp0079860;	name=Mal-B2-PA;	parent=FBgn0032382,FBtr0080276;
FBpp0423050	GH13_23	2.2e-113	380.1	2.7	2.9e-113	379.7	2.7	ID=FBpp0423050;	name=Mal-B2-PE;	parent=FBgn0032382,FBtr0473587;
FBpp0423051	GH13_23	2.2e-113	380.1	2.7	2.9e-113	379.7	2.7	ID=FBpp0423051;	name=Mal-B2-PF;	parent=FBgn0032382,FBtr0473588;
FBpp0079859	GH13_23	2.8e-112	376.5	1.4	3.8e-112	376	1.4	ID=FBpp0079859;	name=Mal-B1-PA;	parent=FBgn0032381,FBtr0080275;
FBpp0308388	GH13_23	9.6e-110	368.1	1.3	1.3e-109	367.7	1.3	ID=FBpp0308388;	name=Mal-A5-PC;	parent=FBgn0050359,FBtr0339279;
FBpp0087828	GH13_23	1e-109	368	1.3	1.4e-109	367.6	1.3	ID=FBpp0087828;	name=Mal-A5-PA;	parent=FBgn0050359,FBtr0088749;
FBpp0087826	GH13_23	2.3e-108	363.6	5.4	2.8e-108	363.3	5.4	ID=FBpp0087826;	name=Mal-A2-PA;	parent=FBgn0002569,FBtr0088747;
FBpp0271830	GH13_23	8.7e-107	358.4	3.8	1.1e-106	358	3.8	ID=FBpp0271830;	name=Mal-A6-PC;	parent=FBgn0050360,FBtr0273322;
FBpp0312227	GH13_23	8.7e-107	358.4	3.8	1.1e-106	358	3.8	ID=FBpp0312227;	name=Mal-A6-PD;	parent=FBgn0050360,FBtr0346647;
FBpp0087827	GH13_23	8.7e-107	358.4	2.9	1.2e-106	358	2.9	ID=FBpp0087827;	name=Mal-A4-PA;	parent=FBgn0033294,FBtr0088748;
FBpp0087837	GH13_23	4.5e-106	356.1	0.4	6e-106	355.7	0.4	ID=FBpp0087837;	name=Mal-A3-PA;	parent=FBgn0002571,FBtr0088758;
FBpp0087836	GH13_23	7.9e-106	355.3	0.9	1e-105	354.9	0.9	ID=FBpp0087836;	name=Mal-A7-PA;	parent=FBgn0033296,FBtr0088757;
FBpp0311600	GH13_23	7.9e-106	355.3	0.9	1e-105	354.9	0.9	ID=FBpp0311600;	name=Mal-A7-PB;	parent=FBgn0033296,FBtr0345489;
FBpp0087838	GH13_23	1.4e-105	354.4	5.5	2e-105	353.9	5.5	ID=FBpp0087838;	name=Mal-A1-PA;	parent=FBgn0002570,FBtr0088759;
FBpp0087831	GH13_23	2.7e-105	353.5	0.8	3.5e-105	353.1	0.8	ID=FBpp0087831;	name=Mal-A8-PA;	parent=FBgn0033297,FBtr0088752;
FBpp0290175	GH13_23	1.1e-91	308.7	2	1.5e-91	308.3	2	ID=FBpp0290175;	name=Mal-A5-PB;	parent=FBgn0050359,FBtr0300953;
FBpp0081314	GH13_23	2.1e-12	48.1	0	3.2e-12	47.5	0	ID=FBpp0081314;	name=CD98hc-PA;	parent=FBgn0037533,FBtr0081824;
FBpp0303760	GH13_23	2.1e-12	48.1	0	3.2e-12	47.5	0	ID=FBpp0303760;	name=CD98hc-PB;	parent=FBgn0037533,FBtr0331342;
FBpp0303762	GH13_23	2.1e-12	48.1	0	3.2e-12	47.5	0	ID=FBpp0303762;	name=CD98hc-PD;	parent=FBgn0037533,FBtr0331344;
FBpp0428086	GH13_23	2.5e-12	47.8	0	4e-12	47.1	0	ID=FBpp0428086;	name=CD98hc-PG;	parent=FBgn0037533,FBtr0479743;
FBpp0086845	GH13_23	1.3e-08	35.6	2.5	1.1e-06	29.3	0	ID=FBpp0086845;	name=AGBE-PA;	parent=FBgn0053138,FBtr0087732;
FBpp0086263	GH13_23	3.1e-06	27.8	0.1	0.17	12.2	0	ID=FBpp0086263;	name=Amyrel-PA;	parent=FBgn0020506,FBtr0087117;
FBpp0086155	GH13_23	3.1e-06	27.8	0	0.0095	16.3	0.1	ID=FBpp0086155;	name=Amy-p-PA;	parent=FBgn0000079,FBtr0087004;
FBpp0311627	GH13_23	3.1e-06	27.8	0	0.0095	16.3	0.1	ID=FBpp0311627;	name=Amy-p-PB;	parent=FBgn0000079,FBtr0345521;
FBpp0086136	GH13_23	3.1e-06	27.8	0	0.0095	16.3	0.1	ID=FBpp0086136;	name=Amy-d-PA;	parent=FBgn0000078,FBtr0086983;
FBpp0086155	GH13_24	5.4e-130	433.7	0.2	7.8e-130	433.1	0.2	ID=FBpp0086155;	name=Amy-p-PA;	parent=FBgn0000079,FBtr0087004;
FBpp0311627	GH13_24	5.4e-130	433.7	0.2	7.8e-130	433.1	0.2	ID=FBpp0311627;	name=Amy-p-PB;	parent=FBgn0000079,FBtr0345521;
FBpp0086136	GH13_24	5.5e-130	433.6	0.2	7.8e-130	433.1	0.2	ID=FBpp0086136;	name=Amy-d-PA;	parent=FBgn0000078,FBtr0086983;
FBpp0086263	GH13_24	5.3e-116	387.7	0	7.6e-116	387.2	0	ID=FBpp0086263;	name=Amyrel-PA;	parent=FBgn0020506,FBtr0087117;
FBpp0087838	GH13_24	2.1e-06	28	0.3	6e-05	23.2	0	ID=FBpp0087838;	name=Mal-A1-PA;	parent=FBgn0002570,FBtr0088759;
FBpp0087827	GH13_24	9.1e-06	25.9	0	0.13	12.2	0	ID=FBpp0087827;	name=Mal-A4-PA;	parent=FBgn0033294,FBtr0088748;
FBpp0071525	GH13_25	4.6e-195	649.1	0.1	6.1e-193	642	0.1	ID=FBpp0071525;	name=CG9485-PA;	parent=FBgn0034618,FBtr0071599;
FBpp0289624	GH13_25	4.6e-195	649.1	0.1	6.1e-193	642	0.1	ID=FBpp0289624;	name=CG9485-PE;	parent=FBgn0034618,FBtr0300395;
FBpp0302010	GH13_25	4.6e-195	649.1	0.1	6.1e-193	642	0.1	ID=FBpp0302010;	name=CG9485-PF;	parent=FBgn0034618,FBtr0310327;
FBpp0071527	GH13_25	4.6e-195	649	0.1	6.2e-193	642	0.1	ID=FBpp0071527;	name=CG9485-PC;	parent=FBgn0034618,FBtr0071601;
FBpp0289623	GH13_25	4.7e-195	649	0.1	6.3e-193	642	0.1	ID=FBpp0289623;	name=CG9485-PD;	parent=FBgn0034618,FBtr0300394;
FBpp0071526	GH13_25	5.4e-195	648.8	0.1	6.8e-193	641.9	0.1	ID=FBpp0071526;	name=CG9485-PB;	parent=FBgn0034618,FBtr0071600;
FBpp0087838	GH13_26	3.2e-17	63.8	0.1	7.4e-15	56	0	ID=FBpp0087838;	name=Mal-A1-PA;	parent=FBgn0002570,FBtr0088759;
FBpp0087836	GH13_26	6.8e-17	62.7	0.3	3e-15	57.3	0	ID=FBpp0087836;	name=Mal-A7-PA;	parent=FBgn0033296,FBtr0088757;
FBpp0311600	GH13_26	6.8e-17	62.7	0.3	3e-15	57.3	0	ID=FBpp0311600;	name=Mal-A7-PB;	parent=FBgn0033296,FBtr0345489;
FBpp0087831	GH13_26	3e-16	60.6	0.1	3.8e-15	57	0	ID=FBpp0087831;	name=Mal-A8-PA;	parent=FBgn0033297,FBtr0088752;
FBpp0271830	GH13_26	3.8e-16	60.2	0.3	7e-15	56.1	0	ID=FBpp0271830;	name=Mal-A6-PC;	parent=FBgn0050360,FBtr0273322;
FBpp0312227	GH13_26	3.8e-16	60.2	0.3	7e-15	56.1	0	ID=FBpp0312227;	name=Mal-A6-PD;	parent=FBgn0050360,FBtr0346647;
FBpp0087837	GH13_26	5.6e-16	59.7	0	8.9e-15	55.8	0	ID=FBpp0087837;	name=Mal-A3-PA;	parent=FBgn0002571,FBtr0088758;
FBpp0079859	GH13_26	4.4e-15	56.8	0	8e-14	52.6	0	ID=FBpp0079859;	name=Mal-B1-PA;	parent=FBgn0032381,FBtr0080275;
FBpp0087828	GH13_26	6.6e-15	56.2	0	2.8e-14	54.1	0	ID=FBpp0087828;	name=Mal-A5-PA;	parent=FBgn0050359,FBtr0088749;
FBpp0308388	GH13_26	7.4e-15	56	0	2.7e-14	54.2	0	ID=FBpp0308388;	name=Mal-A5-PC;	parent=FBgn0050359,FBtr0339279;
FBpp0087827	GH13_26	1e-14	55.5	0	8e-14	52.6	0	ID=FBpp0087827;	name=Mal-A4-PA;	parent=FBgn0033294,FBtr0088748;
FBpp0079860	GH13_26	1.2e-14	55.3	0	5.3e-13	49.9	0	ID=FBpp0079860;	name=Mal-B2-PA;	parent=FBgn0032382,FBtr0080276;
FBpp0423050	GH13_26	1.3e-14	55.2	0	5.6e-13	49.9	0	ID=FBpp0423050;	name=Mal-B2-PE;	parent=FBgn0032382,FBtr0473587;
FBpp0423051	GH13_26	1.3e-14	55.2	0	5.6e-13	49.9	0	ID=FBpp0423051;	name=Mal-B2-PF;	parent=FBgn0032382,FBtr0473588;
FBpp0087826	GH13_26	4.4e-14	53.5	0	2e-13	51.3	0	ID=FBpp0087826;	name=Mal-A2-PA;	parent=FBgn0002569,FBtr0088747;
FBpp0290175	GH13_26	4.4e-08	33.8	0	2.1e-07	31.6	0	ID=FBpp0290175;	name=Mal-A5-PB;	parent=FBgn0050359,FBtr0300953;
FBpp0086263	GH13_27	7.1e-37	128.1	0	3.1e-34	119.4	0	ID=FBpp0086263;	name=Amyrel-PA;	parent=FBgn0020506,FBtr0087117;
FBpp0086136	GH13_27	4.7e-31	109	0.1	6.9e-15	55.9	0	ID=FBpp0086136;	name=Amy-d-PA;	parent=FBgn0000078,FBtr0086983;
FBpp0086155	GH13_27	5.6e-31	108.7	0.1	6.9e-15	55.9	0	ID=FBpp0086155;	name=Amy-p-PA;	parent=FBgn0000079,FBtr0087004;
FBpp0311627	GH13_27	5.6e-31	108.7	0.1	6.9e-15	55.9	0	ID=FBpp0311627;	name=Amy-p-PB;	parent=FBgn0000079,FBtr0345521;
FBpp0087827	GH13_27	4.4e-09	36.8	0	0.0001	22.5	0	ID=FBpp0087827;	name=Mal-A4-PA;	parent=FBgn0033294,FBtr0088748;
FBpp0087838	GH13_27	1e-07	32.3	0	9.4e-07	29.2	0	ID=FBpp0087838;	name=Mal-A1-PA;	parent=FBgn0002570,FBtr0088759;
FBpp0079860	GH13_27	1.1e-07	32.3	0	0.004	17.2	0	ID=FBpp0079860;	name=Mal-B2-PA;	parent=FBgn0032382,FBtr0080276;
FBpp0423050	GH13_27	1.2e-07	32.1	0	0.0043	17.1	0	ID=FBpp0423050;	name=Mal-B2-PE;	parent=FBgn0032382,FBtr0473587;
FBpp0423051	GH13_27	1.2e-07	32.1	0	0.0043	17.1	0	ID=FBpp0423051;	name=Mal-B2-PF;	parent=FBgn0032382,FBtr0473588;
FBpp0086263	GH13_28	1e-35	124.1	0	1.4e-35	123.6	0	ID=FBpp0086263;	name=Amyrel-PA;	parent=FBgn0020506,FBtr0087117;
FBpp0086155	GH13_28	1.4e-32	113.8	0	1.9e-32	113.3	0	ID=FBpp0086155;	name=Amy-p-PA;	parent=FBgn0000079,FBtr0087004;
FBpp0311627	GH13_28	1.4e-32	113.8	0	1.9e-32	113.3	0	ID=FBpp0311627;	name=Amy-p-PB;	parent=FBgn0000079,FBtr0345521;
FBpp0086136	GH13_28	1.4e-32	113.8	0	1.9e-32	113.3	0	ID=FBpp0086136;	name=Amy-d-PA;	parent=FBgn0000078,FBtr0086983;
FBpp0087826	GH13_28	6.5e-16	59.1	0	4.3e-15	56.5	0	ID=FBpp0087826;	name=Mal-A2-PA;	parent=FBgn0002569,FBtr0088747;
FBpp0087827	GH13_28	3.6e-15	56.7	0.1	7.7e-15	55.6	0.1	ID=FBpp0087827;	name=Mal-A4-PA;	parent=FBgn0033294,FBtr0088748;
FBpp0079860	GH13_28	4.6e-15	56.4	0	1.1e-13	51.8	0.1	ID=FBpp0079860;	name=Mal-B2-PA;	parent=FBgn0032382,FBtr0080276;
FBpp0423050	GH13_28	5.3e-15	56.2	0.1	1.5e-13	51.4	0.1	ID=FBpp0423050;	name=Mal-B2-PE;	parent=FBgn0032382,FBtr0473587;
FBpp0423051	GH13_28	5.3e-15	56.2	0.1	1.5e-13	51.4	0.1	ID=FBpp0423051;	name=Mal-B2-PF;	parent=FBgn0032382,FBtr0473588;
FBpp0308388	GH13_28	9.2e-15	55.4	0	2.2e-14	54.1	0	ID=FBpp0308388;	name=Mal-A5-PC;	parent=FBgn0050359,FBtr0339279;
FBpp0087828	GH13_28	9.9e-15	55.3	0	2.3e-14	54	0	ID=FBpp0087828;	name=Mal-A5-PA;	parent=FBgn0050359,FBtr0088749;
FBpp0271830	GH13_28	2.3e-14	54.1	0	6.6e-14	52.6	0	ID=FBpp0271830;	name=Mal-A6-PC;	parent=FBgn0050360,FBtr0273322;
FBpp0312227	GH13_28	2.3e-14	54.1	0	6.6e-14	52.6	0	ID=FBpp0312227;	name=Mal-A6-PD;	parent=FBgn0050360,FBtr0346647;
FBpp0087838	GH13_28	2.9e-14	53.7	0.8	1.4e-13	51.5	0.7	ID=FBpp0087838;	name=Mal-A1-PA;	parent=FBgn0002570,FBtr0088759;
FBpp0087837	GH13_28	3.8e-14	53.4	0	1.2e-13	51.7	0	ID=FBpp0087837;	name=Mal-A3-PA;	parent=FBgn0002571,FBtr0088758;
FBpp0087831	GH13_28	1.1e-13	51.9	0	5e-13	49.7	0	ID=FBpp0087831;	name=Mal-A8-PA;	parent=FBgn0033297,FBtr0088752;
FBpp0079859	GH13_28	2.7e-13	50.6	0	1e-12	48.6	0	ID=FBpp0079859;	name=Mal-B1-PA;	parent=FBgn0032381,FBtr0080275;
FBpp0290175	GH13_28	2.7e-13	50.6	0	5e-13	49.7	0	ID=FBpp0290175;	name=Mal-A5-PB;	parent=FBgn0050359,FBtr0300953;
FBpp0087836	GH13_28	7.1e-13	49.2	0	2.5e-12	47.4	0	ID=FBpp0087836;	name=Mal-A7-PA;	parent=FBgn0033296,FBtr0088757;
FBpp0311600	GH13_28	7.1e-13	49.2	0	2.5e-12	47.4	0	ID=FBpp0311600;	name=Mal-A7-PB;	parent=FBgn0033296,FBtr0345489;
FBpp0086845	GH13_28	4.8e-10	39.9	1	5.3e-09	36.5	0.1	ID=FBpp0086845;	name=AGBE-PA;	parent=FBgn0053138,FBtr0087732;
FBpp0271830	GH13_29	9.6e-81	272.4	4.7	5e-79	266.7	4.7	ID=FBpp0271830;	name=Mal-A6-PC;	parent=FBgn0050360,FBtr0273322;
FBpp0312227	GH13_29	9.6e-81	272.4	4.7	5e-79	266.7	4.7	ID=FBpp0312227;	name=Mal-A6-PD;	parent=FBgn0050360,FBtr0346647;
FBpp0079860	GH13_29	4.3e-78	263.7	1.6	1.7e-77	261.7	1.6	ID=FBpp0079860;	name=Mal-B2-PA;	parent=FBgn0032382,FBtr0080276;
FBpp0423050	GH13_29	4.4e-78	263.6	1.5	1.7e-77	261.7	1.5	ID=FBpp0423050;	name=Mal-B2-PE;	parent=FBgn0032382,FBtr0473587;
FBpp0423051	GH13_29	4.4e-78	263.6	1.5	1.7e-77	261.7	1.5	ID=FBpp0423051;	name=Mal-B2-PF;	parent=FBgn0032382,FBtr0473588;
FBpp0308388	GH13_29	1.9e-77	261.5	0.9	1.7e-68	232.1	0.4	ID=FBpp0308388;	name=Mal-A5-PC;	parent=FBgn0050359,FBtr0339279;
FBpp0087828	GH13_29	2.1e-77	261.4	0.9	1.8e-68	232	0.4	ID=FBpp0087828;	name=Mal-A5-PA;	parent=FBgn0050359,FBtr0088749;
FBpp0087827	GH13_29	2.1e-75	254.8	3	7.8e-69	233.2	1.3	ID=FBpp0087827;	name=Mal-A4-PA;	parent=FBgn0033294,FBtr0088748;
FBpp0079859	GH13_29	1.2e-74	252.3	2.7	5.3e-67	227.2	0.7	ID=FBpp0079859;	name=Mal-B1-PA;	parent=FBgn0032381,FBtr0080275;
FBpp0087836	GH13_29	2.3e-74	251.4	1.6	4.2e-66	224.2	0.7	ID=FBpp0087836;	name=Mal-A7-PA;	parent=FBgn0033296,FBtr0088757;
FBpp0311600	GH13_29	2.3e-74	251.4	1.6	4.2e-66	224.2	0.7	ID=FBpp0311600;	name=Mal-A7-PB;	parent=FBgn0033296,FBtr0345489;
FBpp0087838	GH13_29	7e-74	249.8	7.8	1.9e-72	245.1	7.8	ID=FBpp0087838;	name=Mal-A1-PA;	parent=FBgn0002570,FBtr0088759;
FBpp0087837	GH13_29	8.6e-74	249.5	0.8	2.1e-65	222	0.3	ID=FBpp0087837;	name=Mal-A3-PA;	parent=FBgn0002571,FBtr0088758;
FBpp0087831	GH13_29	8.9e-74	249.5	0.8	2.6e-73	247.9	0.8	ID=FBpp0087831;	name=Mal-A8-PA;	parent=FBgn0033297,FBtr0088752;
FBpp0087826	GH13_29	5.3e-71	240.3	5.5	2.1e-69	235.1	5.5	ID=FBpp0087826;	name=Mal-A2-PA;	parent=FBgn0002569,FBtr0088747;
FBpp0290175	GH13_29	3.3e-61	208.1	1.5	3.1e-52	178.6	0.9	ID=FBpp0290175;	name=Mal-A5-PB;	parent=FBgn0050359,FBtr0300953;
FBpp0081314	GH13_29	6.6e-11	42.7	0	1e-10	42.1	0	ID=FBpp0081314;	name=CD98hc-PA;	parent=FBgn0037533,FBtr0081824;
FBpp0303760	GH13_29	6.6e-11	42.7	0	1e-10	42.1	0	ID=FBpp0303760;	name=CD98hc-PB;	parent=FBgn0037533,FBtr0331342;
FBpp0303762	GH13_29	6.7e-11	42.7	0	1e-10	42.1	0	ID=FBpp0303762;	name=CD98hc-PD;	parent=FBgn0037533,FBtr0331344;
FBpp0428086	GH13_29	7.9e-11	42.5	0	1.2e-10	41.9	0	ID=FBpp0428086;	name=CD98hc-PG;	parent=FBgn0037533,FBtr0479743;
FBpp0271830	GH13_2	1.1e-34	121.1	1.1	2e-32	113.7	0.3	ID=FBpp0271830;	name=Mal-A6-PC;	parent=FBgn0050360,FBtr0273322;
FBpp0312227	GH13_2	1.1e-34	121.1	1.1	2e-32	113.7	0.3	ID=FBpp0312227;	name=Mal-A6-PD;	parent=FBgn0050360,FBtr0346647;
FBpp0087826	GH13_2	4.9e-34	119	0.7	3e-31	109.8	0.1	ID=FBpp0087826;	name=Mal-A2-PA;	parent=FBgn0002569,FBtr0088747;
FBpp0087827	GH13_2	1.8e-33	117.1	0.1	3e-30	106.5	0	ID=FBpp0087827;	name=Mal-A4-PA;	parent=FBgn0033294,FBtr0088748;
FBpp0079859	GH13_2	6.8e-33	115.2	0.8	1.1e-28	101.3	0.2	ID=FBpp0079859;	name=Mal-B1-PA;	parent=FBgn0032381,FBtr0080275;
FBpp0087836	GH13_2	9.3e-33	114.8	0.1	6.7e-30	105.4	0.1	ID=FBpp0087836;	name=Mal-A7-PA;	parent=FBgn0033296,FBtr0088757;
FBpp0311600	GH13_2	9.3e-33	114.8	0.1	6.7e-30	105.4	0.1	ID=FBpp0311600;	name=Mal-A7-PB;	parent=FBgn0033296,FBtr0345489;
FBpp0087831	GH13_2	5.2e-32	112.3	0	5.5e-29	102.4	0	ID=FBpp0087831;	name=Mal-A8-PA;	parent=FBgn0033297,FBtr0088752;
FBpp0079860	GH13_2	5.5e-32	112.2	1.8	2.7e-29	103.4	0.2	ID=FBpp0079860;	name=Mal-B2-PA;	parent=FBgn0032382,FBtr0080276;
FBpp0423050	GH13_2	6.9e-32	111.9	1.9	2.9e-29	103.3	0.2	ID=FBpp0423050;	name=Mal-B2-PE;	parent=FBgn0032382,FBtr0473587;
FBpp0423051	GH13_2	6.9e-32	111.9	1.9	2.9e-29	103.3	0.2	ID=FBpp0423051;	name=Mal-B2-PF;	parent=FBgn0032382,FBtr0473588;
FBpp0087837	GH13_2	8.1e-32	111.7	0	6.1e-29	102.2	0	ID=FBpp0087837;	name=Mal-A3-PA;	parent=FBgn0002571,FBtr0088758;
FBpp0087838	GH13_2	8.5e-32	111.6	1.6	3.7e-30	106.2	0.7	ID=FBpp0087838;	name=Mal-A1-PA;	parent=FBgn0002570,FBtr0088759;
FBpp0308388	GH13_2	4.1e-30	106.1	0.1	6.1e-28	98.9	0	ID=FBpp0308388;	name=Mal-A5-PC;	parent=FBgn0050359,FBtr0339279;
FBpp0087828	GH13_2	4.5e-30	105.9	0.1	6.5e-28	98.9	0	ID=FBpp0087828;	name=Mal-A5-PA;	parent=FBgn0050359,FBtr0088749;
FBpp0086263	GH13_2	1.7e-23	84.3	0	2.4e-23	83.9	0	ID=FBpp0086263;	name=Amyrel-PA;	parent=FBgn0020506,FBtr0087117;
FBpp0086155	GH13_2	3.1e-20	73.6	0	5e-20	72.9	0	ID=FBpp0086155;	name=Amy-p-PA;	parent=FBgn0000079,FBtr0087004;
FBpp0311627	GH13_2	3.1e-20	73.6	0	5e-20	72.9	0	ID=FBpp0311627;	name=Amy-p-PB;	parent=FBgn0000079,FBtr0345521;
FBpp0086136	GH13_2	3.2e-20	73.6	0	5e-20	72.9	0	ID=FBpp0086136;	name=Amy-d-PA;	parent=FBgn0000078,FBtr0086983;
FBpp0290175	GH13_2	1.3e-19	71.5	0.5	2.1e-17	64.3	0.1	ID=FBpp0290175;	name=Mal-A5-PB;	parent=FBgn0050359,FBtr0300953;
FBpp0079860	GH13_30	4.4e-86	290.1	8.6	9.4e-84	282.4	8.6	ID=FBpp0079860;	name=Mal-B2-PA;	parent=FBgn0032382,FBtr0080276;
FBpp0423050	GH13_30	5e-86	289.9	8.6	1e-83	282.3	8.6	ID=FBpp0423050;	name=Mal-B2-PE;	parent=FBgn0032382,FBtr0473587;
FBpp0423051	GH13_30	5e-86	289.9	8.6	1e-83	282.3	8.6	ID=FBpp0423051;	name=Mal-B2-PF;	parent=FBgn0032382,FBtr0473588;
FBpp0087836	GH13_30	5.7e-84	283.1	4.6	6.8e-82	276.3	4.6	ID=FBpp0087836;	name=Mal-A7-PA;	parent=FBgn0033296,FBtr0088757;
FBpp0311600	GH13_30	5.7e-84	283.1	4.6	6.8e-82	276.3	4.6	ID=FBpp0311600;	name=Mal-A7-PB;	parent=FBgn0033296,FBtr0345489;
FBpp0087827	GH13_30	1.9e-83	281.4	9.6	8.4e-81	272.7	9.6	ID=FBpp0087827;	name=Mal-A4-PA;	parent=FBgn0033294,FBtr0088748;
FBpp0308388	GH13_30	4.8e-82	276.8	5	1.3e-79	268.8	5	ID=FBpp0308388;	name=Mal-A5-PC;	parent=FBgn0050359,FBtr0339279;
FBpp0087828	GH13_30	5e-82	276.7	5	1.4e-79	268.7	5	ID=FBpp0087828;	name=Mal-A5-PA;	parent=FBgn0050359,FBtr0088749;
FBpp0079859	GH13_30	2.6e-81	274.4	3.9	3.6e-79	267.3	3.9	ID=FBpp0079859;	name=Mal-B1-PA;	parent=FBgn0032381,FBtr0080275;
FBpp0087826	GH13_30	7.2e-81	272.9	9.6	7.8e-79	266.2	9.6	ID=FBpp0087826;	name=Mal-A2-PA;	parent=FBgn0002569,FBtr0088747;
FBpp0087837	GH13_30	3.9e-80	270.5	1.9	8.5e-78	262.8	1.9	ID=FBpp0087837;	name=Mal-A3-PA;	parent=FBgn0002571,FBtr0088758;
FBpp0087831	GH13_30	7.5e-80	269.6	3.3	1.6e-77	261.9	3.3	ID=FBpp0087831;	name=Mal-A8-PA;	parent=FBgn0033297,FBtr0088752;
FBpp0271830	GH13_30	1.4e-79	268.7	6.8	3.8e-77	260.7	6.8	ID=FBpp0271830;	name=Mal-A6-PC;	parent=FBgn0050360,FBtr0273322;
FBpp0312227	GH13_30	1.4e-79	268.7	6.8	3.8e-77	260.7	6.8	ID=FBpp0312227;	name=Mal-A6-PD;	parent=FBgn0050360,FBtr0346647;
FBpp0087838	GH13_30	8.7e-79	266.1	7.6	1e-76	259.3	4.3	ID=FBpp0087838;	name=Mal-A1-PA;	parent=FBgn0002570,FBtr0088759;
FBpp0290175	GH13_30	1.3e-65	222.7	6.8	1.2e-62	213	3.2	ID=FBpp0290175;	name=Mal-A5-PB;	parent=FBgn0050359,FBtr0300953;
FBpp0081314	GH13_30	9.1e-13	48.8	0	1.3e-12	48.3	0	ID=FBpp0081314;	name=CD98hc-PA;	parent=FBgn0037533,FBtr0081824;
FBpp0303760	GH13_30	9.1e-13	48.8	0	1.3e-12	48.3	0	ID=FBpp0303760;	name=CD98hc-PB;	parent=FBgn0037533,FBtr0331342;
FBpp0303762	GH13_30	9.2e-13	48.8	0	1.3e-12	48.3	0	ID=FBpp0303762;	name=CD98hc-PD;	parent=FBgn0037533,FBtr0331344;
FBpp0428086	GH13_30	1.1e-12	48.6	0	1.6e-12	48	0	ID=FBpp0428086;	name=CD98hc-PG;	parent=FBgn0037533,FBtr0479743;
FBpp0086155	GH13_30	4.4e-08	33.4	0	0.002	18.1	0	ID=FBpp0086155;	name=Amy-p-PA;	parent=FBgn0000079,FBtr0087004;
FBpp0311627	GH13_30	4.4e-08	33.4	0	0.002	18.1	0	ID=FBpp0311627;	name=Amy-p-PB;	parent=FBgn0000079,FBtr0345521;
FBpp0086136	GH13_30	4.4e-08	33.4	0	0.002	18.1	0	ID=FBpp0086136;	name=Amy-d-PA;	parent=FBgn0000078,FBtr0086983;
FBpp0086263	GH13_30	1.5e-07	31.6	0.1	7.7e-05	22.8	0.1	ID=FBpp0086263;	name=Amyrel-PA;	parent=FBgn0020506,FBtr0087117;
FBpp0086845	GH13_30	6.4e-07	29.6	1.1	6.5e-05	23	0	ID=FBpp0086845;	name=AGBE-PA;	parent=FBgn0053138,FBtr0087732;
FBpp0271830	GH13_31	1.5e-92	311.5	3.2	2.1e-92	311	3.2	ID=FBpp0271830;	name=Mal-A6-PC;	parent=FBgn0050360,FBtr0273322;
FBpp0312227	GH13_31	1.5e-92	311.5	3.2	2.1e-92	311	3.2	ID=FBpp0312227;	name=Mal-A6-PD;	parent=FBgn0050360,FBtr0346647;
FBpp0079860	GH13_31	5.3e-91	306.4	1.4	7.3e-91	305.9	1.4	ID=FBpp0079860;	name=Mal-B2-PA;	parent=FBgn0032382,FBtr0080276;
FBpp0423050	GH13_31	5.8e-91	306.3	1.4	8.1e-91	305.8	1.4	ID=FBpp0423050;	name=Mal-B2-PE;	parent=FBgn0032382,FBtr0473587;
FBpp0423051	GH13_31	5.8e-91	306.3	1.4	8.1e-91	305.8	1.4	ID=FBpp0423051;	name=Mal-B2-PF;	parent=FBgn0032382,FBtr0473588;
FBpp0079859	GH13_31	5e-89	299.9	1	7.2e-89	299.4	1	ID=FBpp0079859;	name=Mal-B1-PA;	parent=FBgn0032381,FBtr0080275;
FBpp0308388	GH13_31	3.3e-88	297.2	0.5	8.2e-88	295.9	0.5	ID=FBpp0308388;	name=Mal-A5-PC;	parent=FBgn0050359,FBtr0339279;
FBpp0087828	GH13_31	8.9e-88	295.8	0.5	8.9e-88	295.8	0.5	ID=FBpp0087828;	name=Mal-A5-PA;	parent=FBgn0050359,FBtr0088749;
FBpp0087831	GH13_31	5.7e-87	293.1	0.4	8.4e-87	292.6	0.4	ID=FBpp0087831;	name=Mal-A8-PA;	parent=FBgn0033297,FBtr0088752;
FBpp0087836	GH13_31	3.2e-86	290.7	0.2	5.2e-86	290	0.2	ID=FBpp0087836;	name=Mal-A7-PA;	parent=FBgn0033296,FBtr0088757;
FBpp0311600	GH13_31	3.2e-86	290.7	0.2	5.2e-86	290	0.2	ID=FBpp0311600;	name=Mal-A7-PB;	parent=FBgn0033296,FBtr0345489;
FBpp0087827	GH13_31	7.7e-86	289.4	2.4	1.3e-85	288.7	2.4	ID=FBpp0087827;	name=Mal-A4-PA;	parent=FBgn0033294,FBtr0088748;
FBpp0087838	GH13_31	2e-85	288	5.7	2.9e-85	287.5	5.7	ID=FBpp0087838;	name=Mal-A1-PA;	parent=FBgn0002570,FBtr0088759;
FBpp0087826	GH13_31	2.7e-83	281	6.6	5.3e-83	280.1	6.6	ID=FBpp0087826;	name=Mal-A2-PA;	parent=FBgn0002569,FBtr0088747;
FBpp0087837	GH13_31	5.8e-83	279.9	0.2	1.1e-82	279	0.2	ID=FBpp0087837;	name=Mal-A3-PA;	parent=FBgn0002571,FBtr0088758;
FBpp0290175	GH13_31	2.9e-70	238.2	1.8	2.9e-70	238.2	1.8	ID=FBpp0290175;	name=Mal-A5-PB;	parent=FBgn0050359,FBtr0300953;
FBpp0081314	GH13_31	2.6e-10	41	0	4e-10	40.4	0	ID=FBpp0081314;	name=CD98hc-PA;	parent=FBgn0037533,FBtr0081824;
FBpp0303760	GH13_31	2.6e-10	41	0	4e-10	40.4	0	ID=FBpp0303760;	name=CD98hc-PB;	parent=FBgn0037533,FBtr0331342;
FBpp0303762	GH13_31	2.6e-10	41	0	4e-10	40.4	0	ID=FBpp0303762;	name=CD98hc-PD;	parent=FBgn0037533,FBtr0331344;
FBpp0428086	GH13_31	3e-10	40.8	0	4.8e-10	40.1	0	ID=FBpp0428086;	name=CD98hc-PG;	parent=FBgn0037533,FBtr0479743;
FBpp0086155	GH13_31	9.6e-08	32.6	0	0.0051	17	0	ID=FBpp0086155;	name=Amy-p-PA;	parent=FBgn0000079,FBtr0087004;
FBpp0311627	GH13_31	9.6e-08	32.6	0	0.0051	17	0	ID=FBpp0311627;	name=Amy-p-PB;	parent=FBgn0000079,FBtr0345521;
FBpp0086136	GH13_31	9.6e-08	32.6	0	0.0051	17	0	ID=FBpp0086136;	name=Amy-d-PA;	parent=FBgn0000078,FBtr0086983;
FBpp0086263	GH13_31	1.1e-06	29.1	0.1	0.062	13.5	0	ID=FBpp0086263;	name=Amyrel-PA;	parent=FBgn0020506,FBtr0087117;
FBpp0086845	GH13_31	2.8e-06	27.7	0.6	0.0001	22.6	0	ID=FBpp0086845;	name=AGBE-PA;	parent=FBgn0053138,FBtr0087732;
FBpp0086155	GH13_32	2.2e-86	290.5	0.1	2.8e-86	290.1	0.1	ID=FBpp0086155;	name=Amy-p-PA;	parent=FBgn0000079,FBtr0087004;
FBpp0311627	GH13_32	2.2e-86	290.5	0.1	2.8e-86	290.1	0.1	ID=FBpp0311627;	name=Amy-p-PB;	parent=FBgn0000079,FBtr0345521;
FBpp0086136	GH13_32	2.2e-86	290.5	0.1	2.8e-86	290.1	0.1	ID=FBpp0086136;	name=Amy-d-PA;	parent=FBgn0000078,FBtr0086983;
FBpp0086263	GH13_32	4.4e-85	286.2	0	5.4e-85	285.9	0	ID=FBpp0086263;	name=Amyrel-PA;	parent=FBgn0020506,FBtr0087117;
FBpp0087827	GH13_32	6.9e-18	65.9	0	5.8e-17	62.9	0	ID=FBpp0087827;	name=Mal-A4-PA;	parent=FBgn0033294,FBtr0088748;
FBpp0087826	GH13_32	1.4e-17	64.9	0.3	9.4e-17	62.2	0.3	ID=FBpp0087826;	name=Mal-A2-PA;	parent=FBgn0002569,FBtr0088747;
FBpp0079860	GH13_32	4.9e-17	63.1	0.2	7.9e-16	59.2	0	ID=FBpp0079860;	name=Mal-B2-PA;	parent=FBgn0032382,FBtr0080276;
FBpp0423050	GH13_32	5.5e-17	63	0.2	8.4e-16	59.1	0	ID=FBpp0423050;	name=Mal-B2-PE;	parent=FBgn0032382,FBtr0473587;
FBpp0423051	GH13_32	5.5e-17	63	0.2	8.4e-16	59.1	0	ID=FBpp0423051;	name=Mal-B2-PF;	parent=FBgn0032382,FBtr0473588;
FBpp0079859	GH13_32	1.9e-15	57.9	0.2	9.1e-15	55.7	0	ID=FBpp0079859;	name=Mal-B1-PA;	parent=FBgn0032381,FBtr0080275;
FBpp0271830	GH13_32	3.6e-15	57	0.9	8.5e-14	52.5	0.3	ID=FBpp0271830;	name=Mal-A6-PC;	parent=FBgn0050360,FBtr0273322;
FBpp0312227	GH13_32	3.6e-15	57	0.9	8.5e-14	52.5	0.3	ID=FBpp0312227;	name=Mal-A6-PD;	parent=FBgn0050360,FBtr0346647;
FBpp0087838	GH13_32	4.1e-15	56.8	1.6	1.2e-14	55.3	1.6	ID=FBpp0087838;	name=Mal-A1-PA;	parent=FBgn0002570,FBtr0088759;
FBpp0087836	GH13_32	4.2e-14	53.5	0.1	1.3e-13	51.9	0.1	ID=FBpp0087836;	name=Mal-A7-PA;	parent=FBgn0033296,FBtr0088757;
FBpp0311600	GH13_32	4.2e-14	53.5	0.1	1.3e-13	51.9	0.1	ID=FBpp0311600;	name=Mal-A7-PB;	parent=FBgn0033296,FBtr0345489;
FBpp0308388	GH13_32	2.2e-13	51.1	0	5.4e-13	49.9	0	ID=FBpp0308388;	name=Mal-A5-PC;	parent=FBgn0050359,FBtr0339279;
FBpp0087828	GH13_32	2.2e-13	51.1	0.1	5.7e-13	49.8	0	ID=FBpp0087828;	name=Mal-A5-PA;	parent=FBgn0050359,FBtr0088749;
FBpp0290175	GH13_32	5.2e-12	46.6	0.2	1.4e-11	45.2	0	ID=FBpp0290175;	name=Mal-A5-PB;	parent=FBgn0050359,FBtr0300953;
FBpp0087831	GH13_32	8.9e-12	45.9	0	2.1e-11	44.7	0	ID=FBpp0087831;	name=Mal-A8-PA;	parent=FBgn0033297,FBtr0088752;
FBpp0087837	GH13_32	2.8e-11	44.3	0	1.7e-10	41.7	0	ID=FBpp0087837;	name=Mal-A3-PA;	parent=FBgn0002571,FBtr0088758;
FBpp0086845	GH13_32	1.8e-07	31.7	0.8	1.2e-06	29.1	0.8	ID=FBpp0086845;	name=AGBE-PA;	parent=FBgn0053138,FBtr0087732;
FBpp0087837	GH13_33	2.8e-08	34	0.5	1.6e-05	25	0	ID=FBpp0087837;	name=Mal-A3-PA;	parent=FBgn0002571,FBtr0088758;
FBpp0087827	GH13_33	5.2e-06	26.6	0	0.0001	22.3	0	ID=FBpp0087827;	name=Mal-A4-PA;	parent=FBgn0033294,FBtr0088748;
FBpp0087826	GH13_34	1.6e-28	100.7	0	1e-11	45.7	0	ID=FBpp0087826;	name=Mal-A2-PA;	parent=FBgn0002569,FBtr0088747;
FBpp0087838	GH13_34	2.1e-28	100.3	0	1.1e-13	52.1	0	ID=FBpp0087838;	name=Mal-A1-PA;	parent=FBgn0002570,FBtr0088759;
FBpp0087827	GH13_34	9.2e-28	98.2	0	2.3e-11	44.5	0	ID=FBpp0087827;	name=Mal-A4-PA;	parent=FBgn0033294,FBtr0088748;
FBpp0308388	GH13_34	7.5e-26	92	0	6.6e-13	49.6	0	ID=FBpp0308388;	name=Mal-A5-PC;	parent=FBgn0050359,FBtr0339279;
FBpp0087828	GH13_34	8.3e-26	91.8	0	6.9e-13	49.5	0	ID=FBpp0087828;	name=Mal-A5-PA;	parent=FBgn0050359,FBtr0088749;
FBpp0271830	GH13_34	2.3e-25	90.4	0	4.1e-15	56.8	0	ID=FBpp0271830;	name=Mal-A6-PC;	parent=FBgn0050360,FBtr0273322;
FBpp0312227	GH13_34	2.3e-25	90.4	0	4.1e-15	56.8	0	ID=FBpp0312227;	name=Mal-A6-PD;	parent=FBgn0050360,FBtr0346647;
FBpp0087836	GH13_34	2.1e-24	87.2	0	1.2e-12	48.7	0	ID=FBpp0087836;	name=Mal-A7-PA;	parent=FBgn0033296,FBtr0088757;
FBpp0311600	GH13_34	2.1e-24	87.2	0	1.2e-12	48.7	0	ID=FBpp0311600;	name=Mal-A7-PB;	parent=FBgn0033296,FBtr0345489;
FBpp0079860	GH13_34	2.8e-24	86.8	0	7e-11	42.9	0	ID=FBpp0079860;	name=Mal-B2-PA;	parent=FBgn0032382,FBtr0080276;
FBpp0423050	GH13_34	3.2e-24	86.6	0	7.4e-11	42.9	0	ID=FBpp0423050;	name=Mal-B2-PE;	parent=FBgn0032382,FBtr0473587;
FBpp0423051	GH13_34	3.2e-24	86.6	0	7.4e-11	42.9	0	ID=FBpp0423051;	name=Mal-B2-PF;	parent=FBgn0032382,FBtr0473588;
FBpp0087831	GH13_34	5.8e-24	85.8	0	7.3e-13	49.4	0	ID=FBpp0087831;	name=Mal-A8-PA;	parent=FBgn0033297,FBtr0088752;
FBpp0079859	GH13_34	2.4e-23	83.7	0	5.3e-12	46.6	0	ID=FBpp0079859;	name=Mal-B1-PA;	parent=FBgn0032381,FBtr0080275;
FBpp0290175	GH13_34	3.3e-22	80	0	4.9e-09	36.9	0	ID=FBpp0290175;	name=Mal-A5-PB;	parent=FBgn0050359,FBtr0300953;
FBpp0087837	GH13_34	1.8e-21	77.6	0	1.2e-11	45.4	0	ID=FBpp0087837;	name=Mal-A3-PA;	parent=FBgn0002571,FBtr0088758;
FBpp0087828	GH13_35	1.9e-109	367	0.4	3.1e-109	366.2	0.2	ID=FBpp0087828;	name=Mal-A5-PA;	parent=FBgn0050359,FBtr0088749;
FBpp0308388	GH13_35	2.2e-109	366.7	0.6	2.8e-109	366.4	0.2	ID=FBpp0308388;	name=Mal-A5-PC;	parent=FBgn0050359,FBtr0339279;
FBpp0087827	GH13_35	3.1e-108	362.9	3.8	4.2e-108	362.5	3.8	ID=FBpp0087827;	name=Mal-A4-PA;	parent=FBgn0033294,FBtr0088748;
FBpp0079860	GH13_35	4.3e-108	362.5	1.7	5.4e-108	362.2	1.7	ID=FBpp0079860;	name=Mal-B2-PA;	parent=FBgn0032382,FBtr0080276;
FBpp0423050	GH13_35	4.7e-108	362.3	1.7	5.9e-108	362	1.7	ID=FBpp0423050;	name=Mal-B2-PE;	parent=FBgn0032382,FBtr0473587;
FBpp0423051	GH13_35	4.7e-108	362.3	1.7	5.9e-108	362	1.7	ID=FBpp0423051;	name=Mal-B2-PF;	parent=FBgn0032382,FBtr0473588;
FBpp0079859	GH13_35	1.4e-107	360.8	2.8	1.8e-107	360.4	2.8	ID=FBpp0079859;	name=Mal-B1-PA;	parent=FBgn0032381,FBtr0080275;
FBpp0087837	GH13_35	1.6e-103	347.4	0.3	2e-103	347.1	0.3	ID=FBpp0087837;	name=Mal-A3-PA;	parent=FBgn0002571,FBtr0088758;
FBpp0087838	GH13_35	5.4e-102	342.4	8.3	6.9e-102	342.1	8.3	ID=FBpp0087838;	name=Mal-A1-PA;	parent=FBgn0002570,FBtr0088759;
FBpp0087826	GH13_35	8.3e-101	338.5	5.4	1e-100	338.2	5.4	ID=FBpp0087826;	name=Mal-A2-PA;	parent=FBgn0002569,FBtr0088747;
FBpp0087831	GH13_35	1.3e-98	331.3	1.3	1.6e-98	331	1.3	ID=FBpp0087831;	name=Mal-A8-PA;	parent=FBgn0033297,FBtr0088752;
FBpp0290175	GH13_35	4.5e-98	329.5	1.5	5.4e-98	329.2	0.8	ID=FBpp0290175;	name=Mal-A5-PB;	parent=FBgn0050359,FBtr0300953;
FBpp0271830	GH13_35	2.1e-97	327.3	4.1	2.7e-97	327	4.1	ID=FBpp0271830;	name=Mal-A6-PC;	parent=FBgn0050360,FBtr0273322;
FBpp0312227	GH13_35	2.1e-97	327.3	4.1	2.7e-97	327	4.1	ID=FBpp0312227;	name=Mal-A6-PD;	parent=FBgn0050360,FBtr0346647;
FBpp0087836	GH13_35	7.7e-96	322.2	0.2	1e-95	321.7	0.2	ID=FBpp0087836;	name=Mal-A7-PA;	parent=FBgn0033296,FBtr0088757;
FBpp0311600	GH13_35	7.7e-96	322.2	0.2	1e-95	321.7	0.2	ID=FBpp0311600;	name=Mal-A7-PB;	parent=FBgn0033296,FBtr0345489;
FBpp0081314	GH13_35	7.2e-12	46	0	1e-11	45.5	0	ID=FBpp0081314;	name=CD98hc-PA;	parent=FBgn0037533,FBtr0081824;
FBpp0303760	GH13_35	7.2e-12	46	0	1e-11	45.5	0	ID=FBpp0303760;	name=CD98hc-PB;	parent=FBgn0037533,FBtr0331342;
FBpp0303762	GH13_35	7.2e-12	46	0	1.1e-11	45.4	0	ID=FBpp0303762;	name=CD98hc-PD;	parent=FBgn0037533,FBtr0331344;
FBpp0428086	GH13_35	9.1e-12	45.7	0	1.3e-11	45.1	0	ID=FBpp0428086;	name=CD98hc-PG;	parent=FBgn0037533,FBtr0479743;
FBpp0087838	GH13_36	3.5e-76	257.4	5.4	2.3e-75	254.7	5.4	ID=FBpp0087838;	name=Mal-A1-PA;	parent=FBgn0002570,FBtr0088759;
FBpp0079860	GH13_36	1.8e-75	255	0.3	5.4e-75	253.5	0.3	ID=FBpp0079860;	name=Mal-B2-PA;	parent=FBgn0032382,FBtr0080276;
FBpp0423050	GH13_36	2.1e-75	254.8	0.3	5.9e-75	253.3	0.3	ID=FBpp0423050;	name=Mal-B2-PE;	parent=FBgn0032382,FBtr0473587;
FBpp0423051	GH13_36	2.1e-75	254.8	0.3	5.9e-75	253.3	0.3	ID=FBpp0423051;	name=Mal-B2-PF;	parent=FBgn0032382,FBtr0473588;
FBpp0271830	GH13_36	2.6e-73	247.9	2.2	9.7e-73	246.1	2.2	ID=FBpp0271830;	name=Mal-A6-PC;	parent=FBgn0050360,FBtr0273322;
FBpp0312227	GH13_36	2.6e-73	247.9	2.2	9.7e-73	246.1	2.2	ID=FBpp0312227;	name=Mal-A6-PD;	parent=FBgn0050360,FBtr0346647;
FBpp0087826	GH13_36	5.3e-73	246.9	1.8	1.4e-72	245.6	1.8	ID=FBpp0087826;	name=Mal-A2-PA;	parent=FBgn0002569,FBtr0088747;
FBpp0079859	GH13_36	1.9e-72	245.1	0.7	3.2e-72	244.4	0.7	ID=FBpp0079859;	name=Mal-B1-PA;	parent=FBgn0032381,FBtr0080275;
FBpp0087827	GH13_36	5.9e-72	243.5	0.4	1.2e-71	242.5	0.4	ID=FBpp0087827;	name=Mal-A4-PA;	parent=FBgn0033294,FBtr0088748;
FBpp0087837	GH13_36	5.8e-70	236.9	0	1.5e-69	235.6	0	ID=FBpp0087837;	name=Mal-A3-PA;	parent=FBgn0002571,FBtr0088758;
FBpp0308388	GH13_36	1.9e-69	235.3	0	9.6e-69	232.9	0	ID=FBpp0308388;	name=Mal-A5-PC;	parent=FBgn0050359,FBtr0339279;
FBpp0087828	GH13_36	2e-69	235.2	0	1e-68	232.8	0	ID=FBpp0087828;	name=Mal-A5-PA;	parent=FBgn0050359,FBtr0088749;
FBpp0087836	GH13_36	1.5e-68	232.3	0.1	4.1e-68	230.9	0.1	ID=FBpp0087836;	name=Mal-A7-PA;	parent=FBgn0033296,FBtr0088757;
FBpp0311600	GH13_36	1.5e-68	232.3	0.1	4.1e-68	230.9	0.1	ID=FBpp0311600;	name=Mal-A7-PB;	parent=FBgn0033296,FBtr0345489;
FBpp0087831	GH13_36	9.7e-68	229.6	0.1	3e-67	228	0.1	ID=FBpp0087831;	name=Mal-A8-PA;	parent=FBgn0033297,FBtr0088752;
FBpp0290175	GH13_36	8.3e-55	187.2	0	4.9e-54	184.6	0	ID=FBpp0290175;	name=Mal-A5-PB;	parent=FBgn0050359,FBtr0300953;
FBpp0086155	GH13_36	1.9e-17	64.4	0	4.2e-17	63.3	0	ID=FBpp0086155;	name=Amy-p-PA;	parent=FBgn0000079,FBtr0087004;
FBpp0311627	GH13_36	1.9e-17	64.4	0	4.2e-17	63.3	0	ID=FBpp0311627;	name=Amy-p-PB;	parent=FBgn0000079,FBtr0345521;
FBpp0086136	GH13_36	1.9e-17	64.4	0	4.2e-17	63.3	0	ID=FBpp0086136;	name=Amy-d-PA;	parent=FBgn0000078,FBtr0086983;
FBpp0086263	GH13_36	1e-15	58.8	0	4.6e-15	56.6	0	ID=FBpp0086263;	name=Amyrel-PA;	parent=FBgn0020506,FBtr0087117;
FBpp0086845	GH13_36	3e-10	40.8	0.2	3.9e-07	30.5	0.1	ID=FBpp0086845;	name=AGBE-PA;	parent=FBgn0053138,FBtr0087732;
FBpp0081314	GH13_36	3.8e-10	40.4	0	5.8e-10	39.8	0	ID=FBpp0081314;	name=CD98hc-PA;	parent=FBgn0037533,FBtr0081824;
FBpp0303760	GH13_36	3.8e-10	40.4	0	5.8e-10	39.8	0	ID=FBpp0303760;	name=CD98hc-PB;	parent=FBgn0037533,FBtr0331342;
FBpp0303762	GH13_36	3.8e-10	40.4	0	5.9e-10	39.8	0	ID=FBpp0303762;	name=CD98hc-PD;	parent=FBgn0037533,FBtr0331344;
FBpp0428086	GH13_36	4.5e-10	40.2	0	7.1e-10	39.6	0	ID=FBpp0428086;	name=CD98hc-PG;	parent=FBgn0037533,FBtr0479743;
FBpp0271830	GH13_37	9.8e-19	68.2	1.3	4.2e-16	59.5	0.1	ID=FBpp0271830;	name=Mal-A6-PC;	parent=FBgn0050360,FBtr0273322;
FBpp0312227	GH13_37	9.8e-19	68.2	1.3	4.2e-16	59.5	0.1	ID=FBpp0312227;	name=Mal-A6-PD;	parent=FBgn0050360,FBtr0346647;
FBpp0079860	GH13_37	2.9e-17	63.3	0.1	7.9e-16	58.6	0	ID=FBpp0079860;	name=Mal-B2-PA;	parent=FBgn0032382,FBtr0080276;
FBpp0087831	GH13_37	3e-17	63.3	0.1	1.6e-15	57.6	0	ID=FBpp0087831;	name=Mal-A8-PA;	parent=FBgn0033297,FBtr0088752;
FBpp0423050	GH13_37	3.3e-17	63.2	0.1	8.3e-16	58.5	0	ID=FBpp0423050;	name=Mal-B2-PE;	parent=FBgn0032382,FBtr0473587;
FBpp0423051	GH13_37	3.3e-17	63.2	0.1	8.3e-16	58.5	0	ID=FBpp0423051;	name=Mal-B2-PF;	parent=FBgn0032382,FBtr0473588;
FBpp0079859	GH13_37	1e-16	61.5	0.5	2e-15	57.3	0	ID=FBpp0079859;	name=Mal-B1-PA;	parent=FBgn0032381,FBtr0080275;
FBpp0087827	GH13_37	1.3e-16	61.2	2	1.8e-13	50.9	0	ID=FBpp0087827;	name=Mal-A4-PA;	parent=FBgn0033294,FBtr0088748;
FBpp0087838	GH13_37	1.6e-16	60.9	0.3	3e-14	53.4	0	ID=FBpp0087838;	name=Mal-A1-PA;	parent=FBgn0002570,FBtr0088759;
FBpp0087826	GH13_37	3.2e-16	59.9	0.6	4.8e-13	49.5	0.1	ID=FBpp0087826;	name=Mal-A2-PA;	parent=FBgn0002569,FBtr0088747;
FBpp0087836	GH13_37	6.2e-16	59	0.3	1.6e-14	54.3	0	ID=FBpp0087836;	name=Mal-A7-PA;	parent=FBgn0033296,FBtr0088757;
FBpp0311600	GH13_37	6.2e-16	59	0.3	1.6e-14	54.3	0	ID=FBpp0311600;	name=Mal-A7-PB;	parent=FBgn0033296,FBtr0345489;
FBpp0086845	GH13_37	2.9e-13	50.2	0.7	4.9e-13	49.4	0.7	ID=FBpp0086845;	name=AGBE-PA;	parent=FBgn0053138,FBtr0087732;
FBpp0308388	GH13_37	1.2e-12	48.1	0	9.9e-11	41.9	0	ID=FBpp0308388;	name=Mal-A5-PC;	parent=FBgn0050359,FBtr0339279;
FBpp0087828	GH13_37	1.4e-12	48	0	1e-10	41.8	0	ID=FBpp0087828;	name=Mal-A5-PA;	parent=FBgn0050359,FBtr0088749;
FBpp0087837	GH13_37	6.3e-12	45.8	0.2	9.8e-11	41.9	0	ID=FBpp0087837;	name=Mal-A3-PA;	parent=FBgn0002571,FBtr0088758;
FBpp0087836	GH13_38	5.3e-16	59.2	2.6	4.2e-07	29.9	0.1	ID=FBpp0087836;	name=Mal-A7-PA;	parent=FBgn0033296,FBtr0088757;
FBpp0311600	GH13_38	5.3e-16	59.2	2.6	4.2e-07	29.9	0.1	ID=FBpp0311600;	name=Mal-A7-PB;	parent=FBgn0033296,FBtr0345489;
FBpp0087831	GH13_38	8e-16	58.6	1.2	6.4e-07	29.3	0	ID=FBpp0087831;	name=Mal-A8-PA;	parent=FBgn0033297,FBtr0088752;
FBpp0087827	GH13_38	2e-14	54	1.3	1.3e-05	24.9	0	ID=FBpp0087827;	name=Mal-A4-PA;	parent=FBgn0033294,FBtr0088748;
FBpp0079860	GH13_38	2.7e-14	53.6	1.7	1.3e-05	25	0	ID=FBpp0079860;	name=Mal-B2-PA;	parent=FBgn0032382,FBtr0080276;
FBpp0423050	GH13_38	3e-14	53.4	1.6	1.3e-05	25	0	ID=FBpp0423050;	name=Mal-B2-PE;	parent=FBgn0032382,FBtr0473587;
FBpp0423051	GH13_38	3e-14	53.4	1.6	1.3e-05	25	0	ID=FBpp0423051;	name=Mal-B2-PF;	parent=FBgn0032382,FBtr0473588;
FBpp0087838	GH13_38	6.1e-14	52.4	5.6	2.6e-06	27.3	0.1	ID=FBpp0087838;	name=Mal-A1-PA;	parent=FBgn0002570,FBtr0088759;
FBpp0079859	GH13_38	7.8e-14	52	1.4	4e-05	23.4	0	ID=FBpp0079859;	name=Mal-B1-PA;	parent=FBgn0032381,FBtr0080275;
FBpp0271830	GH13_38	1.2e-11	44.9	2.3	7.5e-06	25.8	0.1	ID=FBpp0271830;	name=Mal-A6-PC;	parent=FBgn0050360,FBtr0273322;
FBpp0312227	GH13_38	1.2e-11	44.9	2.3	7.5e-06	25.8	0.1	ID=FBpp0312227;	name=Mal-A6-PD;	parent=FBgn0050360,FBtr0346647;
FBpp0087826	GH13_38	2.7e-11	43.7	5	7.8e-05	22.4	0.1	ID=FBpp0087826;	name=Mal-A2-PA;	parent=FBgn0002569,FBtr0088747;
FBpp0087837	GH13_38	4.7e-11	42.9	0.8	5.4e-05	23	0	ID=FBpp0087837;	name=Mal-A3-PA;	parent=FBgn0002571,FBtr0088758;
FBpp0308388	GH13_38	1.4e-09	38.1	0.8	0.0037	16.9	0.1	ID=FBpp0308388;	name=Mal-A5-PC;	parent=FBgn0050359,FBtr0339279;
FBpp0087828	GH13_38	1.6e-09	37.9	0.9	0.0039	16.8	0.1	ID=FBpp0087828;	name=Mal-A5-PA;	parent=FBgn0050359,FBtr0088749;
FBpp0290175	GH13_38	2.4e-09	37.3	0.2	0.003	17.2	0.1	ID=FBpp0290175;	name=Mal-A5-PB;	parent=FBgn0050359,FBtr0300953;
FBpp0071525	GH13_38	1.1e-06	28.5	0	0.0013	18.4	0	ID=FBpp0071525;	name=CG9485-PA;	parent=FBgn0034618,FBtr0071599;
FBpp0289624	GH13_38	1.1e-06	28.5	0	0.0013	18.4	0	ID=FBpp0289624;	name=CG9485-PE;	parent=FBgn0034618,FBtr0300395;
FBpp0302010	GH13_38	1.1e-06	28.5	0	0.0013	18.4	0	ID=FBpp0302010;	name=CG9485-PF;	parent=FBgn0034618,FBtr0310327;
FBpp0071527	GH13_38	1.1e-06	28.5	0	0.0013	18.4	0	ID=FBpp0071527;	name=CG9485-PC;	parent=FBgn0034618,FBtr0071601;
FBpp0289623	GH13_38	1.1e-06	28.5	0	0.0013	18.4	0	ID=FBpp0289623;	name=CG9485-PD;	parent=FBgn0034618,FBtr0300394;
FBpp0071526	GH13_38	1.2e-06	28.3	0	0.0014	18.3	0	ID=FBpp0071526;	name=CG9485-PB;	parent=FBgn0034618,FBtr0071600;
FBpp0087826	GH13_39	3.9e-33	115.9	4.7	7.8e-28	98.5	0.2	ID=FBpp0087826;	name=Mal-A2-PA;	parent=FBgn0002569,FBtr0088747;
FBpp0271830	GH13_39	9.1e-33	114.7	5.8	9.8e-32	111.4	5.8	ID=FBpp0271830;	name=Mal-A6-PC;	parent=FBgn0050360,FBtr0273322;
FBpp0312227	GH13_39	9.1e-33	114.7	5.8	9.8e-32	111.4	5.8	ID=FBpp0312227;	name=Mal-A6-PD;	parent=FBgn0050360,FBtr0346647;
FBpp0087837	GH13_39	6.1e-32	112	0.1	2.1e-30	106.9	0.1	ID=FBpp0087837;	name=Mal-A3-PA;	parent=FBgn0002571,FBtr0088758;
FBpp0087831	GH13_39	1.3e-31	111	3.4	1.5e-30	107.5	2.1	ID=FBpp0087831;	name=Mal-A8-PA;	parent=FBgn0033297,FBtr0088752;
FBpp0308388	GH13_39	2.3e-31	110.1	0.1	1.9e-30	107.1	0.1	ID=FBpp0308388;	name=Mal-A5-PC;	parent=FBgn0050359,FBtr0339279;
FBpp0087828	GH13_39	2.5e-31	110	0.1	2.1e-30	107	0.1	ID=FBpp0087828;	name=Mal-A5-PA;	parent=FBgn0050359,FBtr0088749;
FBpp0087836	GH13_39	2.9e-30	106.5	0.9	5.2e-29	102.4	0.9	ID=FBpp0087836;	name=Mal-A7-PA;	parent=FBgn0033296,FBtr0088757;
FBpp0311600	GH13_39	2.9e-30	106.5	0.9	5.2e-29	102.4	0.9	ID=FBpp0311600;	name=Mal-A7-PB;	parent=FBgn0033296,FBtr0345489;
FBpp0087827	GH13_39	5.8e-30	105.5	1.1	2.3e-26	93.7	0.3	ID=FBpp0087827;	name=Mal-A4-PA;	parent=FBgn0033294,FBtr0088748;
FBpp0079860	GH13_39	9.2e-29	101.6	3	1e-25	91.6	0.7	ID=FBpp0079860;	name=Mal-B2-PA;	parent=FBgn0032382,FBtr0080276;
FBpp0423050	GH13_39	9.8e-29	101.5	2.9	1.1e-25	91.5	0.7	ID=FBpp0423050;	name=Mal-B2-PE;	parent=FBgn0032382,FBtr0473587;
FBpp0423051	GH13_39	9.8e-29	101.5	2.9	1.1e-25	91.5	0.7	ID=FBpp0423051;	name=Mal-B2-PF;	parent=FBgn0032382,FBtr0473588;
FBpp0087838	GH13_39	1.3e-28	101.1	7.6	2.3e-24	87.1	2.4	ID=FBpp0087838;	name=Mal-A1-PA;	parent=FBgn0002570,FBtr0088759;
FBpp0079859	GH13_39	8.7e-27	95.1	2.9	3.4e-22	80	0.4	ID=FBpp0079859;	name=Mal-B1-PA;	parent=FBgn0032381,FBtr0080275;
FBpp0290175	GH13_39	1.9e-19	71	0.3	1.7e-18	67.8	0.3	ID=FBpp0290175;	name=Mal-A5-PB;	parent=FBgn0050359,FBtr0300953;
FBpp0086155	GH13_39	2.5e-07	31.1	0	3.8e-07	30.6	0	ID=FBpp0086155;	name=Amy-p-PA;	parent=FBgn0000079,FBtr0087004;
FBpp0311627	GH13_39	2.5e-07	31.1	0	3.8e-07	30.6	0	ID=FBpp0311627;	name=Amy-p-PB;	parent=FBgn0000079,FBtr0345521;
FBpp0086136	GH13_39	2.5e-07	31.1	0	3.8e-07	30.6	0	ID=FBpp0086136;	name=Amy-d-PA;	parent=FBgn0000078,FBtr0086983;
FBpp0087838	GH13_3	4e-21	76.2	0	1.3e-18	68	0	ID=FBpp0087838;	name=Mal-A1-PA;	parent=FBgn0002570,FBtr0088759;
FBpp0079860	GH13_3	2.4e-18	67.2	0.1	8.6e-12	45.8	0	ID=FBpp0079860;	name=Mal-B2-PA;	parent=FBgn0032382,FBtr0080276;
FBpp0423050	GH13_3	2.6e-18	67	0.1	9e-12	45.7	0	ID=FBpp0423050;	name=Mal-B2-PE;	parent=FBgn0032382,FBtr0473587;
FBpp0423051	GH13_3	2.6e-18	67	0.1	9e-12	45.7	0	ID=FBpp0423051;	name=Mal-B2-PF;	parent=FBgn0032382,FBtr0473588;
FBpp0079859	GH13_3	3.8e-18	66.5	0	3.8e-12	46.9	0	ID=FBpp0079859;	name=Mal-B1-PA;	parent=FBgn0032381,FBtr0080275;
FBpp0087827	GH13_3	7.8e-18	65.5	1.8	1.4e-10	41.8	0	ID=FBpp0087827;	name=Mal-A4-PA;	parent=FBgn0033294,FBtr0088748;
FBpp0087836	GH13_3	5e-17	62.9	1.1	8.1e-15	55.6	0.2	ID=FBpp0087836;	name=Mal-A7-PA;	parent=FBgn0033296,FBtr0088757;
FBpp0311600	GH13_3	5e-17	62.9	1.1	8.1e-15	55.6	0.2	ID=FBpp0311600;	name=Mal-A7-PB;	parent=FBgn0033296,FBtr0345489;
FBpp0087831	GH13_3	6.4e-17	62.5	0	1.5e-14	54.7	0	ID=FBpp0087831;	name=Mal-A8-PA;	parent=FBgn0033297,FBtr0088752;
FBpp0087837	GH13_3	1.3e-15	58.3	0.3	2.5e-13	50.8	0.3	ID=FBpp0087837;	name=Mal-A3-PA;	parent=FBgn0002571,FBtr0088758;
FBpp0308388	GH13_3	3.6e-15	56.8	0.5	1e-13	52	0.2	ID=FBpp0308388;	name=Mal-A5-PC;	parent=FBgn0050359,FBtr0339279;
FBpp0087828	GH13_3	3.9e-15	56.7	0.5	1.1e-13	51.9	0.2	ID=FBpp0087828;	name=Mal-A5-PA;	parent=FBgn0050359,FBtr0088749;
FBpp0271830	GH13_3	4.3e-15	56.5	0.2	1.7e-12	48	0.2	ID=FBpp0271830;	name=Mal-A6-PC;	parent=FBgn0050360,FBtr0273322;
FBpp0312227	GH13_3	4.3e-15	56.5	0.2	1.7e-12	48	0.2	ID=FBpp0312227;	name=Mal-A6-PD;	parent=FBgn0050360,FBtr0346647;
FBpp0087826	GH13_3	4.3e-15	56.5	0	3.8e-09	37.1	0	ID=FBpp0087826;	name=Mal-A2-PA;	parent=FBgn0002569,FBtr0088747;
FBpp0071525	GH13_3	3.9e-12	46.9	0	7e-06	26.4	0	ID=FBpp0071525;	name=CG9485-PA;	parent=FBgn0034618,FBtr0071599;
FBpp0289624	GH13_3	3.9e-12	46.9	0	7e-06	26.4	0	ID=FBpp0289624;	name=CG9485-PE;	parent=FBgn0034618,FBtr0300395;
FBpp0302010	GH13_3	3.9e-12	46.9	0	7e-06	26.4	0	ID=FBpp0302010;	name=CG9485-PF;	parent=FBgn0034618,FBtr0310327;
FBpp0071527	GH13_3	3.9e-12	46.9	0	7e-06	26.4	0	ID=FBpp0071527;	name=CG9485-PC;	parent=FBgn0034618,FBtr0071601;
FBpp0289623	GH13_3	4e-12	46.8	0	7.1e-06	26.4	0	ID=FBpp0289623;	name=CG9485-PD;	parent=FBgn0034618,FBtr0300394;
FBpp0290175	GH13_3	4.1e-12	46.8	0.7	1.6e-10	41.6	0.7	ID=FBpp0290175;	name=Mal-A5-PB;	parent=FBgn0050359,FBtr0300953;
FBpp0071526	GH13_3	4.5e-12	46.7	0	7.5e-06	26.3	0	ID=FBpp0071526;	name=CG9485-PB;	parent=FBgn0034618,FBtr0071600;
FBpp0086845	GH13_3	1.1e-09	38.8	0.3	3e-09	37.4	0	ID=FBpp0086845;	name=AGBE-PA;	parent=FBgn0053138,FBtr0087732;
FBpp0086263	GH13_3	1.9e-08	34.8	0	0.00058	20.2	0	ID=FBpp0086263;	name=Amyrel-PA;	parent=FBgn0020506,FBtr0087117;
FBpp0086155	GH13_3	1.2e-07	32.2	0	0.0068	16.7	0	ID=FBpp0086155;	name=Amy-p-PA;	parent=FBgn0000079,FBtr0087004;
FBpp0311627	GH13_3	1.2e-07	32.2	0	0.0068	16.7	0	ID=FBpp0311627;	name=Amy-p-PB;	parent=FBgn0000079,FBtr0345521;
FBpp0086136	GH13_3	1.2e-07	32.2	0	0.0068	16.7	0	ID=FBpp0086136;	name=Amy-d-PA;	parent=FBgn0000078,FBtr0086983;
FBpp0079860	GH13_40	1.2e-81	275.3	1.3	5.3e-81	273.1	1.3	ID=FBpp0079860;	name=Mal-B2-PA;	parent=FBgn0032382,FBtr0080276;
FBpp0423050	GH13_40	1.3e-81	275.2	1.2	5.8e-81	273	1.2	ID=FBpp0423050;	name=Mal-B2-PE;	parent=FBgn0032382,FBtr0473587;
FBpp0423051	GH13_40	1.3e-81	275.2	1.2	5.8e-81	273	1.2	ID=FBpp0423051;	name=Mal-B2-PF;	parent=FBgn0032382,FBtr0473588;
FBpp0271830	GH13_40	7.8e-80	269.3	2.5	1.2e-79	268.7	2.5	ID=FBpp0271830;	name=Mal-A6-PC;	parent=FBgn0050360,FBtr0273322;
FBpp0312227	GH13_40	7.8e-80	269.3	2.5	1.2e-79	268.7	2.5	ID=FBpp0312227;	name=Mal-A6-PD;	parent=FBgn0050360,FBtr0346647;
FBpp0079859	GH13_40	1.4e-79	268.5	0.7	2.4e-79	267.7	0.7	ID=FBpp0079859;	name=Mal-B1-PA;	parent=FBgn0032381,FBtr0080275;
FBpp0087828	GH13_40	2.5e-78	264.4	1.2	1.3e-77	262	1.2	ID=FBpp0087828;	name=Mal-A5-PA;	parent=FBgn0050359,FBtr0088749;
FBpp0308388	GH13_40	2.9e-78	264.2	1.5	1.5e-77	261.8	1.5	ID=FBpp0308388;	name=Mal-A5-PC;	parent=FBgn0050359,FBtr0339279;
FBpp0087838	GH13_40	1.4e-76	258.6	5.3	2e-76	258.1	5.3	ID=FBpp0087838;	name=Mal-A1-PA;	parent=FBgn0002570,FBtr0088759;
FBpp0087827	GH13_40	1.7e-76	258.4	2.1	4.7e-76	256.9	2.1	ID=FBpp0087827;	name=Mal-A4-PA;	parent=FBgn0033294,FBtr0088748;
FBpp0087831	GH13_40	3.1e-75	254.2	1.1	7.5e-75	252.9	1.1	ID=FBpp0087831;	name=Mal-A8-PA;	parent=FBgn0033297,FBtr0088752;
FBpp0087826	GH13_40	3.2e-75	254.1	3.4	4.4e-75	253.7	3.4	ID=FBpp0087826;	name=Mal-A2-PA;	parent=FBgn0002569,FBtr0088747;
FBpp0087836	GH13_40	1.4e-74	252	1	4.9e-74	250.2	1	ID=FBpp0087836;	name=Mal-A7-PA;	parent=FBgn0033296,FBtr0088757;
FBpp0311600	GH13_40	1.4e-74	252	1	4.9e-74	250.2	1	ID=FBpp0311600;	name=Mal-A7-PB;	parent=FBgn0033296,FBtr0345489;
FBpp0087837	GH13_40	1.7e-70	238.6	0.1	2.9e-70	237.8	0.1	ID=FBpp0087837;	name=Mal-A3-PA;	parent=FBgn0002571,FBtr0088758;
FBpp0290175	GH13_40	2.4e-62	211.8	3	1.5e-61	209.2	3	ID=FBpp0290175;	name=Mal-A5-PB;	parent=FBgn0050359,FBtr0300953;
FBpp0081314	GH13_40	1.7e-07	31.4	0	2.5e-07	30.8	0	ID=FBpp0081314;	name=CD98hc-PA;	parent=FBgn0037533,FBtr0081824;
FBpp0303760	GH13_40	1.7e-07	31.4	0	2.5e-07	30.8	0	ID=FBpp0303760;	name=CD98hc-PB;	parent=FBgn0037533,FBtr0331342;
FBpp0303762	GH13_40	1.7e-07	31.4	0	2.5e-07	30.8	0	ID=FBpp0303762;	name=CD98hc-PD;	parent=FBgn0037533,FBtr0331344;
FBpp0428086	GH13_40	2e-07	31.1	0	3.1e-07	30.5	0	ID=FBpp0428086;	name=CD98hc-PG;	parent=FBgn0037533,FBtr0479743;
FBpp0087826	GH13_41	7.3e-22	78.9	0.4	1.4e-18	68.1	0.1	ID=FBpp0087826;	name=Mal-A2-PA;	parent=FBgn0002569,FBtr0088747;
FBpp0271830	GH13_41	5.7e-21	76	0.8	1.6e-17	64.7	0.1	ID=FBpp0271830;	name=Mal-A6-PC;	parent=FBgn0050360,FBtr0273322;
FBpp0312227	GH13_41	5.7e-21	76	0.8	1.6e-17	64.7	0.1	ID=FBpp0312227;	name=Mal-A6-PD;	parent=FBgn0050360,FBtr0346647;
FBpp0087838	GH13_41	2.3e-20	74	1.2	3.8e-15	56.9	0.5	ID=FBpp0087838;	name=Mal-A1-PA;	parent=FBgn0002570,FBtr0088759;
FBpp0079860	GH13_41	9.4e-19	68.7	0.1	6.5e-16	59.4	0.1	ID=FBpp0079860;	name=Mal-B2-PA;	parent=FBgn0032382,FBtr0080276;
FBpp0423050	GH13_41	1.1e-18	68.5	0.1	7e-16	59.3	0.1	ID=FBpp0423050;	name=Mal-B2-PE;	parent=FBgn0032382,FBtr0473587;
FBpp0423051	GH13_41	1.1e-18	68.5	0.1	7e-16	59.3	0.1	ID=FBpp0423051;	name=Mal-B2-PF;	parent=FBgn0032382,FBtr0473588;
FBpp0087827	GH13_41	1.9e-18	67.7	0	3.7e-16	60.2	0	ID=FBpp0087827;	name=Mal-A4-PA;	parent=FBgn0033294,FBtr0088748;
FBpp0087831	GH13_41	3.5e-18	66.8	0	1.9e-16	61.1	0	ID=FBpp0087831;	name=Mal-A8-PA;	parent=FBgn0033297,FBtr0088752;
FBpp0308388	GH13_41	6.1e-18	66	0	1.1e-14	55.4	0	ID=FBpp0308388;	name=Mal-A5-PC;	parent=FBgn0050359,FBtr0339279;
FBpp0087828	GH13_41	6.5e-18	66	0	1.1e-14	55.3	0	ID=FBpp0087828;	name=Mal-A5-PA;	parent=FBgn0050359,FBtr0088749;
FBpp0079859	GH13_41	6.9e-18	65.9	0.2	1.3e-14	55.1	0.1	ID=FBpp0079859;	name=Mal-B1-PA;	parent=FBgn0032381,FBtr0080275;
FBpp0087836	GH13_41	6.4e-17	62.7	0	1.1e-14	55.3	0	ID=FBpp0087836;	name=Mal-A7-PA;	parent=FBgn0033296,FBtr0088757;
FBpp0311600	GH13_41	6.4e-17	62.7	0	1.1e-14	55.3	0	ID=FBpp0311600;	name=Mal-A7-PB;	parent=FBgn0033296,FBtr0345489;
FBpp0087837	GH13_41	2.5e-15	57.5	0	1.5e-13	51.6	0	ID=FBpp0087837;	name=Mal-A3-PA;	parent=FBgn0002571,FBtr0088758;
FBpp0290175	GH13_41	2.4e-10	41.1	0.1	4.7e-07	30.3	0	ID=FBpp0290175;	name=Mal-A5-PB;	parent=FBgn0050359,FBtr0300953;
FBpp0086845	GH13_41	1.1e-08	35.6	0.3	2.1e-08	34.7	0.1	ID=FBpp0086845;	name=AGBE-PA;	parent=FBgn0053138,FBtr0087732;
FBpp0086263	GH13_41	1.3e-08	35.5	0	1.9e-08	34.9	0	ID=FBpp0086263;	name=Amyrel-PA;	parent=FBgn0020506,FBtr0087117;
FBpp0087826	GH13_42	1.1e-19	71.7	0.1	1.6e-11	44.7	0	ID=FBpp0087826;	name=Mal-A2-PA;	parent=FBgn0002569,FBtr0088747;
FBpp0087827	GH13_42	6.8e-18	65.7	0	4.4e-11	43.3	0	ID=FBpp0087827;	name=Mal-A4-PA;	parent=FBgn0033294,FBtr0088748;
FBpp0271830	GH13_42	2.3e-17	64	0.3	3.3e-13	50.3	0.1	ID=FBpp0271830;	name=Mal-A6-PC;	parent=FBgn0050360,FBtr0273322;
FBpp0312227	GH13_42	2.3e-17	64	0.3	3.3e-13	50.3	0.1	ID=FBpp0312227;	name=Mal-A6-PD;	parent=FBgn0050360,FBtr0346647;
FBpp0087838	GH13_42	3.4e-17	63.4	0.4	9e-12	45.5	0.1	ID=FBpp0087838;	name=Mal-A1-PA;	parent=FBgn0002570,FBtr0088759;
FBpp0087836	GH13_42	2e-16	60.8	0.3	4.3e-10	40	0	ID=FBpp0087836;	name=Mal-A7-PA;	parent=FBgn0033296,FBtr0088757;
FBpp0311600	GH13_42	2e-16	60.8	0.3	4.3e-10	40	0	ID=FBpp0311600;	name=Mal-A7-PB;	parent=FBgn0033296,FBtr0345489;
FBpp0079860	GH13_42	4.4e-15	56.4	0.4	6e-10	39.5	0	ID=FBpp0079860;	name=Mal-B2-PA;	parent=FBgn0032382,FBtr0080276;
FBpp0423050	GH13_42	4.9e-15	56.3	0.4	6.3e-10	39.5	0	ID=FBpp0423050;	name=Mal-B2-PE;	parent=FBgn0032382,FBtr0473587;
FBpp0423051	GH13_42	4.9e-15	56.3	0.4	6.3e-10	39.5	0	ID=FBpp0423051;	name=Mal-B2-PF;	parent=FBgn0032382,FBtr0473588;
FBpp0308388	GH13_42	6.5e-14	52.6	0	4e-09	36.8	0	ID=FBpp0308388;	name=Mal-A5-PC;	parent=FBgn0050359,FBtr0339279;
FBpp0087828	GH13_42	7e-14	52.5	0	4.2e-09	36.7	0	ID=FBpp0087828;	name=Mal-A5-PA;	parent=FBgn0050359,FBtr0088749;
FBpp0087831	GH13_42	7.2e-14	52.5	0.2	1.8e-10	41.2	0	ID=FBpp0087831;	name=Mal-A8-PA;	parent=FBgn0033297,FBtr0088752;
FBpp0079859	GH13_42	1.5e-12	48.1	0.8	5.5e-09	36.4	0	ID=FBpp0079859;	name=Mal-B1-PA;	parent=FBgn0032381,FBtr0080275;
FBpp0086263	GH13_42	3.4e-11	43.6	0.1	8e-08	32.5	0	ID=FBpp0086263;	name=Amyrel-PA;	parent=FBgn0020506,FBtr0087117;
FBpp0087837	GH13_42	4e-11	43.4	0	1.9e-07	31.3	0	ID=FBpp0087837;	name=Mal-A3-PA;	parent=FBgn0002571,FBtr0088758;
FBpp0086155	GH13_42	1.7e-10	41.3	0.3	7.3e-07	29.4	0	ID=FBpp0086155;	name=Amy-p-PA;	parent=FBgn0000079,FBtr0087004;
FBpp0311627	GH13_42	1.7e-10	41.3	0.3	7.3e-07	29.4	0	ID=FBpp0311627;	name=Amy-p-PB;	parent=FBgn0000079,FBtr0345521;
FBpp0086136	GH13_42	1.7e-10	41.3	0.3	7.3e-07	29.4	0	ID=FBpp0086136;	name=Amy-d-PA;	parent=FBgn0000078,FBtr0086983;
FBpp0290175	GH13_42	3.1e-06	27.3	0	0.038	13.8	0	ID=FBpp0290175;	name=Mal-A5-PB;	parent=FBgn0050359,FBtr0300953;
FBpp0079860	GH13_4	3.8e-40	138.6	0.3	5.6e-39	134.8	0.2	ID=FBpp0079860;	name=Mal-B2-PA;	parent=FBgn0032382,FBtr0080276;
FBpp0423050	GH13_4	4.5e-40	138.4	0.3	6e-39	134.7	0.2	ID=FBpp0423050;	name=Mal-B2-PE;	parent=FBgn0032382,FBtr0473587;
FBpp0423051	GH13_4	4.5e-40	138.4	0.3	6e-39	134.7	0.2	ID=FBpp0423051;	name=Mal-B2-PF;	parent=FBgn0032382,FBtr0473588;
FBpp0087837	GH13_4	6.1e-40	138	0.1	1.6e-36	126.7	0.1	ID=FBpp0087837;	name=Mal-A3-PA;	parent=FBgn0002571,FBtr0088758;
FBpp0087838	GH13_4	9.6e-39	134	1.1	6.4e-37	128	0.6	ID=FBpp0087838;	name=Mal-A1-PA;	parent=FBgn0002570,FBtr0088759;
FBpp0087826	GH13_4	6.7e-38	131.2	2.7	2.2e-33	116.4	0.1	ID=FBpp0087826;	name=Mal-A2-PA;	parent=FBgn0002569,FBtr0088747;
FBpp0271830	GH13_4	6.9e-38	131.2	1	5.3e-36	125	0.4	ID=FBpp0271830;	name=Mal-A6-PC;	parent=FBgn0050360,FBtr0273322;
FBpp0312227	GH13_4	6.9e-38	131.2	1	5.3e-36	125	0.4	ID=FBpp0312227;	name=Mal-A6-PD;	parent=FBgn0050360,FBtr0346647;
FBpp0308388	GH13_4	1.3e-37	130.3	0.2	2e-35	123.1	0	ID=FBpp0308388;	name=Mal-A5-PC;	parent=FBgn0050359,FBtr0339279;
FBpp0087828	GH13_4	1.5e-37	130.1	0.2	2.2e-35	123	0	ID=FBpp0087828;	name=Mal-A5-PA;	parent=FBgn0050359,FBtr0088749;
FBpp0087827	GH13_4	2.2e-37	129.5	0.5	5.5e-36	124.9	0.2	ID=FBpp0087827;	name=Mal-A4-PA;	parent=FBgn0033294,FBtr0088748;
FBpp0079859	GH13_4	7.6e-37	127.8	0.1	1e-35	124.1	0.1	ID=FBpp0079859;	name=Mal-B1-PA;	parent=FBgn0032381,FBtr0080275;
FBpp0087831	GH13_4	5.3e-35	121.7	0.2	8.1e-34	117.8	0.1	ID=FBpp0087831;	name=Mal-A8-PA;	parent=FBgn0033297,FBtr0088752;
FBpp0087836	GH13_4	3.1e-34	119.2	0.6	2.1e-33	116.5	0.2	ID=FBpp0087836;	name=Mal-A7-PA;	parent=FBgn0033296,FBtr0088757;
FBpp0311600	GH13_4	3.1e-34	119.2	0.6	2.1e-33	116.5	0.2	ID=FBpp0311600;	name=Mal-A7-PB;	parent=FBgn0033296,FBtr0345489;
FBpp0290175	GH13_4	1e-29	104.3	0.9	1.3e-27	97.3	0.2	ID=FBpp0290175;	name=Mal-A5-PB;	parent=FBgn0050359,FBtr0300953;
FBpp0087838	GH13_5	7.3e-12	45.9	0.2	2.7e-07	30.8	0	ID=FBpp0087838;	name=Mal-A1-PA;	parent=FBgn0002570,FBtr0088759;
[truncated: 157 more rows]

## Sheet: Table S2
Table S2. Gene expression quantification of total RNA-seq
	TPM values									Raw count values
Gene ID	day1_1	day1_2	day1_3	day2_1	day2_2	day2_3	day3_1	day3_2	day3_3	day1_1	day1_2	day1_3	day2_1	day2_2	day2_3	day3_1	day3_2	day3_3
FBgn0000003	0	0	0	0	0	0	0	0	0	0	0	0	0	0	0	0	0	0
FBgn0000008	0.0191132	0.0294945	0.0211868	0.00424983	0.00613635	0.0122261	0.00308345	0.00603963	0.0114216	29	44	32	8	13	29	6	15	29
FBgn0000014	0.127699	0.163303	0.169473	0.0309977	0.0466227	0.0373852	0.0341103	0.0383885	0.0330146	229	334	329	80	125	109	91	122	107
FBgn0000015	0.88299	1.14237	1.30581	0.326928	0.381084	0.376729	0.256229	0.276404	0.360772	1054	1563	1696	569	704	747	462	586	805
FBgn0000017	0.102565	0.101613	0.142801	0.0463237	0.0421433	0.0515551	0.0403352	0.0464767	0.0405588	371.472	506.859	608.187	239.264	265.926	366.593	219.499	317.707	305.028
FBgn0000018	0.0531764	0.0854785	0.101518	0.00862155	0.046238	0.0425192	0.0166809	0.0180037	0.0382502	30	55	62	7	39	39	14	18	39
FBgn0000022	0	0	0	0	0	0	0	0	0	0	0	0	0	0	0	0	0	0
FBgn0000024	0.0764302	0.077979	0.0874726	0.0282586	0.0577126	0.0493623	0.0248046	0.0252442	0.0285311	122	140	155	75	135	121	56	65	82
FBgn0000028	0.00204673	0.00538366	0.00504177	0.00142216	0.00228163	0.00209813	0.000572591	0.00230983	0.000377494	3	9	8	3	5	5	1	6	1
FBgn0000032	0.299451	0.471258	0.370883	0.0662577	0.143225	0.120387	0.0577208	0.090622	0.11478	182	326	244	57	130	120	53	97	124
FBgn0000036	0.0678866	0.0515097	0.077664	0.0660391	0.0866221	0.0764434	0.0626573	0.0745507	0.0917393	260	225	322	364	496	476	357	506	635
FBgn0000037	0.00820116	0.00335566	0.000505054	0.00189951	0.000365697	0.00399294	0.00400014	0.012032	0.00816806	15	7	1	5	1	12	11	39	27
FBgn0000038	0	0.0123947	0.00421912	0.0040425	0.0158493	0.00561851	0.00782137	0	0.00713002	0	6	1	2	6	2	4	0	5
FBgn0000039	0.00533437	0.0128621	0	0.00463321	0.00981188	0.013124	0.0107572	0.00827763	0.00811683	4	11	0	5	11	16	12	11	11
FBgn0000042	23.5349	20.839	20.46	12.0198	12.1239	8.85261	6.83121	7.60283	6.57768	14871.9	15041	14041	10913	11400	9094	6420.01	8473.89	7562
FBgn0000043	1.00646	1.68154	1.93448	0.224394	0.344544	0.346079	0.163807	0.175519	0.191842	508	968	1057	163	260	284	123	157	175
FBgn0000044	2.56952	12.0449	12.7242	0.41866	9.15128	8.58745	0.305315	1.94787	3.91238	1386	7410	7430	325	7380	7531	245	1862	3814
FBgn0000045	0.0126215	0.0202884	0.0194318	0.00730834	0.00703503	0.00388153	0.00424203	0.00593499	0.00931152	6	11	10	5	5	3	3	5	8
FBgn0000046	3.28007	4.51561	4.69827	0.900388	1.79287	1.63978	0.455658	0.952094	1.07148	1822.13	2856	2887	738	1522	1544	375	987.111	1082
FBgn0000047	0.0202522	0.0461682	0.0523824	0	0.0596023	0.0274043	0	0.0285696	0.00336175	10	26	28	0	44	22	0	25	3
FBgn0000052	0.012133	0.0278786	0.0288264	0.0052709	0.0155553	0.0125158	0.00457135	0.00770986	0.0119002	17.5044	45.8739	45.0211	10.9441	33.5526	29.3577	9.81155	19.7124	31.0291
FBgn0000053	0.0761956	0.139103	0.106161	0.0450085	0.0994391	0.0414296	0.0336111	0.0773646	0.0732416	38.9999	99	88	32.1659	92	56	24	90	116
FBgn0000055	37.9539	72.4169	78.1109	11.203	10.4374	11.6407	11.0577	7.76762	10.4987	12559.8	27456.4	28548	5272.99	5325.39	6552.8	5485.03	4615.9	6416.81
FBgn0000056	3.20031	6.25777	7.05754	0.865102	1.09431	1.41001	0.920491	0.688501	1.03066	2107.25	4700.64	5060	818.005	1079.62	1514.2	903.972	806.097	1228.19
FBgn0000057	0.171682	0.189375	0.179054	0.0836973	0.0769078	0.0706812	0.0623549	0.0570317	0.0543917	124	156	140	87	85	83	67	73	71
FBgn0000061	0	0	0	0	0	0	0	0	0.0019469	0	0	0	0	0	0	0	0	2
FBgn0000063	0.0624495	0.0457035	0.0590751	0.0174972	0.0129971	0.0238109	0.0180882	0.00751995	0.0172777	42.2778	35.2887	43.2947	17.0475	13.155	26.2082	18.2173	9.0221	21.1397
FBgn0000064	16.9285	19.3115	20.9893	7.36146	9.08869	7.98779	8.35681	8.44737	6.95774	7204	10391	10379	4372	6214.99	6127	5082	6436	6067
FBgn0000071	0.00639159	0	0	0	0	0	0	0	0	3	0	0	0	0	0	0	0	0
FBgn0000075	0	0	0.00505478	0.00126741	0.00474832	0.00448755	0.00596494	0	0.00294602	0	0	3	1	4	4	5	0	3
FBgn0000077	0.0977791	0.120025	0.178066	0.0330002	0.0541892	0.0738872	0.0319242	0.0457158	0.105113	35	49	69	17	29	43	17	29	68
FBgn0000078	0.0200939	0.0369982	0.00556852	0.0139622	0.0163882	0.0142761	0.0162084	0.0113385	0.0255058	10	21	3	10	12.1935	11.5511	12	10	22.9405
FBgn0000079	0	0	0.00748319	0.00140722	0.0422311	0.00180488	0	0	0.00454901	0	0	4	1	32.8065	1.44895	0	0	4.0595
FBgn0000083	2.56191	3.5365	4.40067	0.987164	1.45939	1.15366	0.747279	0.924511	1.09042	1023.3	1652.17	1932.52	563.187	884.34	761.295	449.054	662.389	810.13
FBgn0000084	1.03992	1.35932	1.50325	0.805398	0.872614	0.848832	1.11606	0.910029	1.04678	385.169	574.117	602.534	429.083	482.877	511.09	614.865	597.646	700.984
FBgn0000092	0.00347324	0.0121812	0.0419483	0	0.0063516	0.00422114	0	0	0.00768715	1	4	13.0745	0	2.73408	1.97594	0	0	4
FBgn0000094	3987.08	2945.06	2595.89	3700.47	5211.03	4928.53	1555.2	2181.42	1977.26	117309	100451	85103	153261	233606	243530	69465	117520	106118
FBgn0000097	0.531221	0.672557	0.856029	0.184041	0.143712	0.151666	0.133371	0.149819	0.147768	729.558	1190	1405.86	358	339	346.637	273	396.999	396.025
FBgn0000100	40.461	54.234	58.1476	13.8853	13.3997	13.1107	12.98	10.5824	10.5886	14483	22141	22532	7153	7171	7630	6912	6713	6850
FBgn0000108	0.00692234	0.0068785	0.0200013	0.00577189	0.00411742	0.00413047	0.000310162	0.00208324	0.00357484	15	17	46	18	11	13	1	8	14
FBgn0000109	1.23868	2.01461	2.50245	0.545324	0.711503	0.567041	0.505298	0.330803	0.376696	271	503	591	170	233	205	162	124	154
FBgn0000114	0.0064246	0.0105902	0.0169157	0.00533988	0.00628908	0.00484886	0.00572071	0.00350952	0.00147486	7	14	19	9	10	9	9	7	3
FBgn0000115	3.28703	7.30968	6.87127	0.337276	1.71443	1.93534	0.24614	0.951429	1.35466	771.993	1958	1747	114	601.994	739	86	396	575
FBgn0000116	3.348	4.62809	4.34389	2.11779	4.38858	4.42427	1.35211	2.36507	2.8917	1922	2831	2575	1795	3438	3802	1295	2432	2896
FBgn0000117	0.695613	0.866492	0.765029	0.450002	0.414866	0.364627	0.320363	0.322624	0.417359	718.687	1024.79	855.342	668.412	640.735	611.847	491.894	591.099	779.25
FBgn0000119	0.0111632	0.0127667	0.0237625	0.001349	0.00519421	0.00835879	0.00391505	0.0010955	0.00698244	23	30	53	4	16	28	12	4	26
FBgn0000120	0	0	0.00902899	0	0	0	0	0	0	0	0	4	0	0	0	0	0	0
FBgn0000121	0	0	0	0	0	0	0	0	0	0	0	0	0	0	0	0	0	0
FBgn0000137	0.00126724	0	0	0	0	0	0	0	0	1	0	0	0	0	0	0	0	0
FBgn0000139	0.189888	0.247425	0.207079	0.124612	0.0829084	0.133015	0.188021	0.21281	0.176572	78	108	87	69	47	82	109	151	125
FBgn0000140	0	0	0.000850834	0	0	0	0	0	0	0	0	2	0	0	0	0	0	0
FBgn0000146	0	0	0	0	0	0	0	0	0.00119918	0	0	0	0	0	0	0	0	2
FBgn0000147	0	0	0.00200446	0	0	0	0.00275824	0	0.00119878	0	0	1.05763	0	0	0	2	0	1.05599
FBgn0000150	122.644	182.953	197.526	46.9973	59.7841	56.1642	31.8811	30.9215	33.4041	16443	27978	28672	9068	11986	12242	6358	7346	8100
FBgn0000152	0.0865892	0.140595	0.147425	0.0307431	0.0649465	0.0419515	0.0346383	0.0546039	0.0241556	72.7698	134.76	134.124	37.1832	81.6031	57.3208	43.3063	81.3244	36.6889
FBgn0000153	0.0277464	0.071703	0.0528902	0.00608827	0.00879088	0.00538924	0.00490814	0.00576822	0.0113123	19	56	37	6	9	6	5	7	14
FBgn0000157	0	0	0	0	0	0.00120133	0	0	0	0	0	0	0	0	2	0	0	0
FBgn0000158	0	0	0	0	0	0	0	0	0	0	0	0	0	0	0	0	0	0
FBgn0000163	0.187714	0.207246	0.249294	0.0685761	0.0790063	0.0693209	0.0659471	0.0538503	0.0459119	515.425	678.857	734.479	249.068	321.66	319.744	264.999	282.577	249.203
FBgn0000166	0.0332924	0.0267219	0.0496752	0.00882968	0.0221604	0.0225388	0.0133624	0.01333	0.0122214	15.0729	13.7982	24.3465	5.75316	15	16.5905	9	10.6953	10
FBgn0000173	1.89007	2.94819	3.43679	0.675557	1.21842	1.08595	1.00983	0.981358	1.15747	1085	1916	2125	554	1041	1010	862	998	1199
FBgn0000179	0	0.00143244	0	0.000378436	0.000902849	0	0	0	0	0	3	0	1	2	0	0	0	0
FBgn0000180	0.00367528	0	0	0	0.00122913	0	0	0	0	4	0	0	0	2	0	0	0	0
FBgn0000181	21.3227	34.8151	36.0221	6.08296	6.45319	5.55229	7.46757	5.42411	6.33586	9616	17907	17586	3948	4351	4071	5010	4335	5164
FBgn0000182	0.000778632	0.00967281	0	0.00209062	0.00268325	0.00061686	0.00067415	0.00113184	0	1	11	0	3	4	1	1	2	0
FBgn0000183	0.879629	1.28902	1.25292	0.221813	0.370544	0.332377	0.181864	0.214865	0.232075	1244	2068.01	1910	452	776	764	384	542.001	588
FBgn0000206	0	0.00176182	0	0	0	0	0	0	0.00111182	0	2	0	0	0	0	0	0	2
FBgn0000212	0.245868	0.33134	0.313946	0.0900866	0.0830275	0.105215	0.0841822	0.0809409	0.0607474	446	685	616	235	225	311	227	260	199
FBgn0000216	0	0	0	0	0	0	0	0	0	0	0	0	0	0	0	0	0	0
FBgn0000221	0.061019	0.0931312	0.104382	0.0471099	0.0453481	0.0556012	0.0607651	0.0459086	0.0512692	27	47	50	30	30	40	40	36	41
FBgn0000227	0	0	0	0	0	0	0	0	0	0	0	0	0	0	0	0	0	0
FBgn0000228	0.506526	0.778619	0.823777	0.211915	0.296555	0.245946	0.222038	0.239094	0.278633	561	921	1006	337	485	451	445	494	562
FBgn0000229	0.247593	0.393355	0.53562	0.0632281	0.144374	0.118445	0.0512092	0.10747	0.153389	117	212	274	43	102	91	36	90	131
FBgn0000233	0	0	0	0	0	0	0	0	0	0	0	0	0	0	0	0	0	0
FBgn0000239	0.243274	0.245593	0.350068	0.0720602	0.0797378	0.0763053	0.0970737	0.0842236	0.0976033	251	289	391	107	123	128	149	154	182
FBgn0000241	0.0266618	0.0490822	0.0178596	0.010605	0.00425007	0	0.00532433	0.00565495	0.0133738	23.9438	50.2727	17.3629	13.7064	5.70641	0	6.44098	9	21.7064
FBgn0000244	0.0728559	0.107353	0.125253	0.0210933	0.0521147	0.0398322	0.0265271	0.0502464	0.0604682	79	122	135	37	85	67	41	91	110
FBgn0000246	0.0244327	0.0279456	0.0225697	0.00902267	0.00947483	0.00580852	0.00555449	0.0133221	0.00849118	21	27	21	11	12	8	7	20	13
FBgn0000247	0.015224	0.0210863	0.0321646	0.0051632	0.00839843	0.00687726	0.00437736	0.0076381	0.00875872	36.7622	58.0732	84.0805	17.9432	30.3202	27	15.725	32.6863	38.2244
FBgn0000250	0.553679	0.761913	0.752848	0.246472	0.268489	0.208487	0.243843	0.268459	0.220724	378	609	573	245	279	233	248.882	326.938	277
FBgn0000251	0	0	0	0	0	0	0	0	0	0	0	0	0	0	0	0	0	0
FBgn0000253	29.1758	33.9559	41.4975	10.8097	14.4986	12.5207	10.1853	12.7111	10.1982	13680	18057	20905	7278	10100	9701	7095	10533	8737
FBgn0000256	0.0753871	0.0973409	0.111941	0.0237334	0.0468017	0.0331313	0.0194479	0.0146256	0.0183359	88	123	146	38	72	58	31	27	37
FBgn0000257	0.103411	0.0992235	0.0811067	0.0359274	0.0352363	0.0420031	0.0262309	0.0231207	0.0286093	106	116	90	53	54	70	40	42	53
FBgn0000259	2.76234	3.85659	4.36775	0.825545	1.3682	1.25135	0.707448	0.980455	1.09277	1581	2343	2592	721.999	1233	1232	653.001	1048	1171
FBgn0000261	0.321489	0.783458	0.786111	0.0657017	0.267736	0.262681	0.0550849	0.188522	0.260722	204	567	540	60	254	271	52	212	299
FBgn0000273	2.52918	3.23927	3.81358	0.806677	0.947542	0.914993	0.588973	0.711619	0.767816	4141.01	6005.01	6653	1894	2355	2425	1442	2061	2307
FBgn0000274	0	0	0	0	0	0	0.00165672	0	0	0	0	0	0	0	0	1	0	0
FBgn0000276	103.343	295.807	318.759	8.63397	97.1636	82.1928	12.5053	58.003	69.578	5117.42	16706.3	17087.5	615.305	7193.43	6617.29	921.232	5090.13	6226.88
FBgn0000277	10.5581	14.8522	13.1175	2.60287	10.6863	6.93019	2.96964	6.19588	4.92488	582.576	934.673	783.541	206.695	881.567	621.711	243.768	605.869	491.124
FBgn0000278	0	0.0329054	0	0.0173848	0.0334693	0	0	0	0.00692184	0	3	0	2	4	0	0	0	1
FBgn0000279	0	0	0	0	0	0.00929908	0	0	0	0	0	0	0	0	1	0	0	0
FBgn0000280	0.643867	0.282268	0	0	0	0	0	0	0	2	1	0	0	0	0	0	0	0
FBgn0000281	0.166144	0	0	0.230889	0	0.204379	0.111681	0	0.183859	1	0	0	2	0	2	1	0	2
FBgn0000283	0.0961344	0.112281	0.126053	0.0225808	0.046248	0.0223095	0.0313657	0.0230241	0.0387588	133.123	177.331	188.961	45.0011	95.7479	50.2273	64.8481	56.5022	97.0002
FBgn0000286	0.212249	0.295794	0.279313	0.137512	0.179523	0.194652	0.131194	0.17707	0.187397	270	431	388	246	340	405	247	394	430
FBgn0000287	0.000566576	0.0114257	0.00209349	0.000393684	0.00151585	0.000696965	0	0.00127882	0	1	23	4	1	4	2	0	4	0
FBgn0000289	0.242625	0.330611	0.423881	0.0798069	0.109865	0.0946811	0.0772599	0.104871	0.0920135	362	554	637	175	260	241	165	288	247
FBgn0000299	0.636362	0.811168	0.829026	0.136147	0.131106	0.0960505	0.0627895	0.0674934	0.0466491	1326	1931	1872	408	407	326	195	249	176
FBgn0000303	0.00107703	0.000944334	0	0.0029935	0	0	0	0	0	1	1	0	4	0	0	0	0	0
FBgn0000307	0.0907619	0.10198	0.107517	0.0576383	0.0339364	0.0323705	0.0414253	0.0360096	0.0408645	200.288	253.837	257.284	184.46	114.424	113.747	138.983	143.919	163.297
FBgn0000308	10.0544	13.7515	14.7797	2.75368	4.98362	5.12875	2.62355	3.28688	4.77837	3543	5442.99	5800	1380	2631	2847	1359	2090	2816
FBgn0000316	0.0695249	0.204917	0.134729	0.0661764	0.0316932	0.0749695	0.0481773	0.0316443	0.0427863	46.994	157.974	98.5845	64.3748	32.0281	82.3879	48.4452	37.906	52.2679
FBgn0000317	0.039632	0.0956457	0.10838	0.0114515	0.022309	0.0311342	0.00474778	0.011071	0.0167181	101	278	299	42	85	129	18	50	77
FBgn0000318	9.01716	14.5885	14.443	3.1244	3.7705	2.84906	2.23251	2.09703	2.123	1326.8	2448.21	2300.59	661.625	829.462	681.576	488.691	546.827	564.564
FBgn0000319	0.536329	0.706273	0.862362	0.215167	0.323156	0.302052	0.149127	0.216709	0.184742	1038	1562	1812	598	932	953	427	745	646
FBgn0000320	0	0	0.00396754	0	0.0021546	0	0	0	0	0	0	4	0	3	0	0	0	0
FBgn0000326	0.0240614	0.0210968	0.0428657	0.0203016	0.0172433	0.0253704	0.0184844	0.0213357	0.025676	14	14	27	17	15	24	16	22	27
FBgn0000330	0.333924	0.54262	0.435958	0.162418	0.134472	0.13801	0.0832569	0.0916998	0.117017	185	335	255	117	112	125	69	88	111
FBgn0000337	0	0.00467419	0.00164151	0	0	0	0	0	0	0	3	1	0	0	0	0	0	0
FBgn0000339	0.230982	0.473903	0.657176	0.128398	0.120506	0.173324	0.136632	0.127731	0.135473	55	120	165	40	42	61	44	51	53
FBgn0000346	0.00100078	0.00614235	0.00277342	0.000695392	0	0.0012311	0.00134544	0.0033883	0.00553747	1	7	3	1	0	2	2	6	10
FBgn0000351	0.04341	0.0951513	0.036382	0.0237522	0.0459242	0.0487823	0.0231022	0.0294391	0.0190504	21.3118	53.2782	20.2819	16.7821	33.7082	38.9377	16.873	25.6132	16.903
FBgn0000352	0.00495568	0.00488823	0.0160223	0.00215215	0.006215	0.0041911	0.00499675	0.00174773	0.00514133	8	9	28	5	15	11	12	5	15
FBgn0000355	0.957316	0.77661	0.851261	1.05062	1.04126	1.53532	0.102238	0.373589	0.316827	107	99	103	169	174	279	17	74	64
FBgn0000356	0	0	0	0	0	0	0	0	0	0	0	0	0	0	0	0	0	0
FBgn0000357	0.0125654	0.0330517	0.0232145	0.0174621	0	0.00386428	0.00844636	0	0.0104289	2	6	4	4	0	1	2	0	3
FBgn0000358	0	0	0	0	0	0	0	0	0	0	0	0	0	0	0	0	0	0
FBgn0000359	0	0	0	0	0	0	0	0	0	0	0	0	0	0	0	0	0	0
FBgn0000360	0	0.0108604	0	0	0	0	0	0	0.00297969	0	4	0	0	0	0	0	0	2
FBgn0000370	8.33378	11.7463	12.4938	2.52424	3.84015	3.63514	2.12925	2.43827	2.87304	5133.57	8241.1	8383.86	2255.1	3547.7	3644.09	1953.52	2645.54	3170.84
FBgn0000376	0.0392916	0.0498264	0.0407519	0.0224206	0.00863541	0.0129532	0.00426293	0.013034	0.0204116	49.7675	71.9795	55.8779	40.8698	16.3528	26.6748	8.03269	29.2573	46.7252
FBgn0000377	0.165683	0.234755	0.24243	0.0727586	0.0709242	0.068481	0.0534579	0.0650695	0.0660057	125	202	198	79	80	84	60	87	90
FBgn0000382	0.508465	0.550086	0.790893	0.193582	0.199411	0.214084	0.143493	0.176569	0.154552	986.001	1210	1581	595	604	708	494	657	591
FBgn0000384	0.111325	0.122867	0.196173	0.0490163	0.0552946	0.0535576	0.0274136	0.0478909	0.0585482	101	125	187	64	75	79	37	77	96
FBgn0000392	0.00236655	0.0021096	0.00603903	0.000930205	0.000625668	0.000595608	0.00168091	0.00101427	0.000485292	3.18334	3.23648	8.79389	1.80077	1.25827	1.30258	3.36372	2.41785	1.17978
FBgn0000394	0.191442	0.247787	0.192655	0.0625859	0.104648	0.0838468	0.0600127	0.0992582	0.0631829	114.707	169.331	124.963	53.9687	93.7452	81.6805	53.494	87.5289	68.42
FBgn0000395	0.0109529	0.00660233	0.00316179	0.00285397	0.00137362	0.00252629	0.00690229	0.00309022	0	16	11	5	6	3	6	15	8	0
FBgn0000404	0.0156085	0.0100359	0.00775953	0.000833821	0.00208798	0.00128003	0.000806634	0	0.00460607	15	11	7	1	3	2	1	0	8
FBgn0000405	0.00120355	0	0	0.000836264	0	0	0	0	0	1	0	0	1	0	0	0	0	0
FBgn0000406	0.020819	0.0127777	0.0115389	0.00775862	0.0164306	0.00896354	0.00300226	0.0117476	0.00691164	10	7	6	5	11	7	2	10	6
FBgn0000411	0.0200086	0.0245607	0.0462073	0.00278058	0.0026766	0.011076	0.0107597	0.00677421	0.00442841	11	15	25	2	2	10	8	7	4
FBgn0000412	1.90962	2.65264	3.088	0.615481	0.781837	0.650543	0.787088	0.68583	0.700481	949	1507	1657	445	582	527	583	617	627
FBgn0000414	0.01403	0.0156017	0.0104314	0.017833	0.0283813	0.0225206	0.0204718	0.0233641	0.0232889	41	52	33	75	124	107	89	121	123
FBgn0000416	1.91346	2.0082	1.99127	1.36512	1.40154	1.30375	1.28133	1.2336	1.49116	2131.92	2561.89	2401.76	2191.94	2338.65	2362.7	2123.82	2437.77	3004.66
FBgn0000422	0.00934027	0.00784185	0.0270363	0.0101661	0.00437229	0.00419114	0.00309229	0.00552653	0.00102598	8.58301	5.4728	26.8952	13.4445	4	6.26166	4.22734	9	1.13463
FBgn0000426	4.65224	7.88061	8.65348	1.23147	2.19443	1.88168	1.39696	1.80962	1.48845	441	852	888	168	311	290	197	304	255
FBgn0000427	0	0	0	0	0	0	0	0	0	0	0	0	0	0	0	0	0	0
FBgn0000439	0	0.00585561	0	0	0	0.00205385	0	0	0	0	6	0	0	0	3	0	0	0
FBgn0000442	0.00592956	0.0010398	0.00438194	0	0	0.00145883	0	0	0	5	1	4	0	0	2	0	0	0
FBgn0000447	0.978818	1.44906	1.75015	0.401661	0.389214	0.341609	0.351372	0.314416	0.330723	401.222	676.751	774.675	236.357	237.931	227.094	213.734	227.831	244.395
FBgn0000448	0.00420508	0.0050762	0.00307679	0	0.00234381	0.00213657	0.00129479	0.00158188	0.00193894	10	15	9	0	9	9	4.99063	4	8.58302
FBgn0000449	0	0.0211556	0.00617065	0	0.00177049	0.00935392	0	0.0112937	0.00920892	0	15.157	4.19625	0	1.6628	9.55334	0	12.5727	10.455
FBgn0000451	0.0416147	0.0633854	0.0641969	0.00591998	0.0229564	0.0144614	0.00768023	0.00921669	0.00280976	31	53	49	6	23.0001	17	9	11	4
FBgn0000454	0.56229	0.757178	0.723297	0.271424	0.28705	0.247803	0.224896	0.20757	0.194814	321	496	447	227	245	232	192	210	205
FBgn0000455	0.520514	0.63253	0.566866	0.270307	0.251647	0.253874	0.241851	0.17932	0.225353	285	397	338	213	206	226	197	174	224
FBgn0000459	0.121511	0.193561	0.192788	0.0470496	0.0670045	0.0616155	0.0317985	0.0455359	0.0467042	131	238	225	73	108	108	51	87	91
FBgn0000463	0.00709707	0.0102493	0.0107983	0	0	0.00155864	0	0.00291251	0.00140215	11	21	21	0	0	3	0	8	3
FBgn0000464	0.0463211	0.0554736	0.0397904	0.0138879	0.0206663	0.0156604	0.00828625	0.01106	0.0120042	127.748	176.167	118.921	55.042	86.2106	70.9116	34.0285	53.7321	60.3102
FBgn0000473	0	0	0	0	0	0	0	0	0	0	0	0	0	0	0	0	0	0
FBgn0000477	0.21156	0.105997	0.0609128	0.334096	0.242579	0.231519	0.108965	0.100774	0.112498	77	44	24	175	132	137	59	65	74
FBgn0000479	0.566528	0.54384	0.599583	0.248272	0.216287	0.206764	0.277125	0.268463	0.318539	1421	1544	1733	999	903	881.001	1112	1249	1482
FBgn0000482	0.199577	0.361597	0.385011	0.0345347	0.126108	0.155657	0.0238795	0.119771	0.0916128	209.092	432.071	436.662	52.0705	197.529	265.138	37.2185	222.376	173.465
FBgn0000489	0.490177	0.732017	0.834516	0.213881	0.283441	0.185434	0.214702	0.177258	0.200062	465	792	857	292	402	286	303	298	343
FBgn0000490	0.243988	0.392891	0.376222	0.0936724	0.192473	0.162331	0.0995524	0.155354	0.136577	282	490	455	147	310	294	162	303	265
FBgn0000492	0.0420538	0.0811192	0.113212	0.0150279	0.0305392	0.0317781	0.00484598	0.0108479	0.0172855	35	77	102	18	38	43	6	16	26
FBgn0000499	0.362354	0.482655	0.527264	0.129975	0.163721	0.127543	0.107056	0.150184	0.0964032	339	515	534	175	229	194	149	249	163
FBgn0000500	0	0	0	0.0106188	0	0	0	0	0	0	0	0	2	0	0	0	0	0
FBgn0000504	0.046594	0.046703	0.0575751	0.0172689	0.0341553	0.0177576	0.0158233	0.0166845	0.0289665	62.8361	71.8508	89.1183	36.8244	74.2373	38.9172	33.3529	41.4021	71.4171
FBgn0000520	0.0344973	0.0577442	0.0622852	0.0250599	0.00839054	0.0327918	0.00632423	0.0230052	0.0104115	22	42	43	23	8	34	6	26	12
FBgn0000524	0.0412903	0.0908489	0.0705264	0.0178638	0.0114639	0.0210837	0.0120446	0.0105505	0.0168115	53	133	98	33	22	44	23	24	39
FBgn0000527	0.0134492	0.00252689	0.0177481	0	0	0	0.00193724	0	0	14	3	20	0	0	0	3	0	0
FBgn0000529	0	0	0	0	0	0	0	0	0	0	0	0	0	0	0	0	0	0
FBgn0000533	0.0551203	0.0402742	0.0360664	0	0.00921698	0.00282523	0	0	0	24	20	17	0	6	2	0	0	0
FBgn0000535	0.00219504	0.00236931	0.001738	0.000871554	0.0041948	0.000385743	0.00076252	0.000530831	0.00121455	7	7	6	4	20	2	2	3	7
FBgn0000536	0.416433	0.591166	0.713097	0.113184	0.27001	0.242196	0.130769	0.226191	0.206123	364	614.001	685	162	326	314	162	333	301
FBgn0000541	0.0838992	0.127517	0.146885	0.052187	0.0560504	0.0527448	0.0526748	0.0456221	0.0462836	257	441	479	224	256	252	235	248	252.999
FBgn0000542	0.025244	0.0212369	0.0247939	0.00591784	0.00340519	0.00419184	0.00370732	0.00311213	0.00684959	59	57	63	20	12	16.0001	13	13	29
FBgn0000543	0.0846049	0.107562	0.0898767	0.0480098	0.049987	0.0442321	0.0464444	0.0143221	0.0390108	60	87	69	49	53	51	49	18	50
FBgn0000546	0.0960967	0.105929	0.118841	0.040709	0.0379386	0.0486543	0.0433805	0.0488396	0.0470337	156	203	212	92	102	130	103	133	146
FBgn0000547	0.437938	0.644457	0.751892	0.149761	0.216982	0.190795	0.110874	0.189178	0.214234	953	1604	1777	470	709	676	360	730	845
FBgn0000551	0	0	0	0.00566133	0.0108992	0	0	0	0.00901634	0	0	0	1	3	0	0	0	2
FBgn0000552	0	0	0	0	0	0	0	0	0	0	0	0	0	0	0	0	0	0
FBgn0000557	0.00945357	0.017613	0.0141908	0.0138889	0.00632301	0.00872172	0.025418	0.00466754	0.016346	8	17	13	17	8	12	32	7	25
FBgn0000559	14.5467	20.7982	22.1092	4.03177	5.79221	5.48855	3.32051	3.81027	4.57271	14453	23568	23780	5765	8604	8866	4908	6709	8211
FBgn0000560	0.00176591	0	0	0	0	0	0	0	0	1	0	0	0	0	0	0	0	0
FBgn0000562	0.134994	0.162075	0.19697	0.0570264	0.0723368	0.0589707	0.0515581	0.0644882	0.0415911	196	242	291	118	141	131	107	156	101
FBgn0000564	0	0	0	0	0	0	0	0	0	0	0	0	0	0	0	0	0	0
FBgn0000565	0.119568	0.585055	0.477434	0.0424646	0.203807	0.320267	0.0220373	0.0152815	0.149391	35	185	138	18	91	145	10	8.00001	74
FBgn0000566	3.20963	4.38406	4.49021	0.760296	0.929984	0.981631	0.471021	0.476477	0.544276	1452	2262	2199	495	629	722	317	382	445
FBgn0000567	0.151722	0.236178	0.226322	0.0247709	0.0524811	0.0479516	0.0153226	0.0435696	0.0349663	311.999	553.999	504	72.0001	161	160	47	159	130
FBgn0000568	0.392574	0.587959	0.632721	0.13301	0.197227	0.244928	0.11756	0.280361	0.271793	718	1204	1243	371	541	715	312	865	874
FBgn0000575	1.00404	1.2247	1.39193	0.359978	0.342427	0.366585	0.272224	0.261288	0.301029	657	914	986	339	335	390	265	303	356
FBgn0000576	0	0	0	0	0	0	0	0	0	0	0	0	0	0	0	0	0	0
FBgn0000577	0	0	0	0	0	0	0	0	0	0	0	0	0	0	0	0	0	0
FBgn0000578	0.126979	0.146165	0.117374	0.0309615	0.0138459	0.0200521	0.0304222	0.0185327	0.0214375	184	247	185	64	29	45	67	49	55
FBgn0000579	5.28567	6.83356	7.45603	2.68585	3.34	2.9913	2.08009	2.2136	2.06343	3150.37	4646.93	4750.96	2246	2934.49	2863.54	1825.39	2347	2236.58
FBgn0000581	0.0973138	0.127887	0.14597	0.0312339	0.0443728	0.0382555	0.0275152	0.0315484	0.039469	317	476	525	149	220	205	136	186	237
FBgn0000588	0.00939274	0.0164709	0.039912	0.0013053	0.00502596	0.00231087	0.00252549	0	0.00311828	5	10	23	1	4	2	2	0	3
FBgn0000591	0	0	0	0	0	0	0	0	0	0	0	0	0	0	0	0	0	0
FBgn0000592	41.7799	17.8258	10.9759	86.755	113.162	119.996	58.0536	85.2028	85.9506	24206	11779	6884	72337	98021	113031	50037	87482	89998
FBgn0000594	0.0352775	0.0525299	0.1208	0.0121156	0.015719	0.0149016	0.0258981	0.0304379	0.0243634	19.2284	32.6553	71.2781	9.50383	12.8095	13.2055	21	29.4014	24
FBgn0000606	0	0	0	0	0	0	0	0	0	0	0	0	0	0	0	0	0	0
FBgn0000611	0.373835	0.546944	0.536144	0.128818	0.171911	0.156141	0.127122	0.140192	0.146056	349	596	555	176	244	241	178	232	249
FBgn0000615	0.0249978	0.0327439	0.0223287	0.0289634	0.029212	0.0192192	0.0196035	0.0127502	0.0294309	20	31	20	35	36	25	23	18	45
FBgn0000617	0.941386	1.26758	1.57263	0.225119	0.504953	0.47562	0.25476	0.296644	0.280735	308	473	557	106	247	253	124	172	166
FBgn0000618	1.90651	2.16086	2.38827	0.975779	0.758895	0.795102	0.981472	0.797663	0.756438	205	265	278	151	122	139	157	152	147
FBgn0000625	0.518658	0.879249	0.95999	0.123238	0.184677	0.215228	0.123087	0.163373	0.152773	541	1046	1084	185	288	365	191	302	288
FBgn0000629	0.132311	0.165258	0.162824	0.0589777	0.0734698	0.0683286	0.0595719	0.0769674	0.0590056	106	151	142.148	68	88	89	71	110	86
FBgn0000633	0.0225044	0.0126575	0.0250313	0.00311274	0.00261997	0.00185761	0.00334583	0.00276056	0.00297839	46	29.0028	55	9	8.0067	6.06767	10	10	11.0028
FBgn0000635	0.613942	0.789415	0.91498	0.270685	0.322935	0.255072	0.238143	0.289054	0.23047	826	1262	1366	508	649	564.999	451	674	564
FBgn0000636	1.75459	2.29676	2.62996	0.632761	0.587257	0.542206	0.36593	0.572132	0.465684	1553	2364	2533	799.999	812	783	478	908	748.001
FBgn0000639	0.0106005	0.0580876	0.106083	0	0.0124077	0.00325996	0	0	0	12	75	130	0	21	6	0	0	0
FBgn0000640	0.130123	0.200523	0.546367	0.00292334	0.0172893	0.0388045	0	0	0.00465576	34	66	153	1	8	16	0	0	2
FBgn0000644	0.0111016	0.032446	0.0102551	0.00257131	0	0.00227608	0.0099499	0.00208812	0	3	10	3	1	0	1	4	1	0
FBgn0000658	0.00253032	0	0	0	0	0	0	0.00190373	0	3	0	0	0	0	0	0	4	0
FBgn0000659	0	0	0	0	0	0	0	0	0	0	0	0	0	0	0	0	0	0
FBgn0000662	0.24109	0.323063	0.350003	0.0919403	0.117372	0.0926641	0.0687729	0.0738485	0.0963348	182	274	286	101	131	115	77	101	133
FBgn0000667	0.272741	0.391048	0.397659	0.0782011	0.169553	0.153466	0.0689672	0.0963625	0.0969561	444.627	732.117	689.396	182.903	399.163	412.054	160.894	282.022	289.381
FBgn0000709	0.0507041	0.0782014	0.0722319	0.0165546	0.0208388	0.0255504	0.0143723	0.0251639	0.0199429	83	146	128	39	51	68	35	73	59
FBgn0000711	1.8175	2.8715	3.02393	0.530777	0.939862	0.836162	0.609869	0.685938	0.885808	2199	3773.01	4022	939	1831	1671	1110	1584	1874
FBgn0000715	0	0	0	0	0.00153992	0	0	0	0.00254778	0	0	0	0	1	0	0	0	2
FBgn0000719	0.163271	0.211747	0.205623	0.0425465	0.0969368	0.0718451	0.0668542	0.0783451	0.066917	241	333.999	355	98	220	186	164	216	190
FBgn0000721	1.4241	2.08754	2.71877	0.785825	1.16583	0.921913	0.714027	1.28839	0.815377	1423	2361	2928	1121	1746	1492	1057	2269	1464
FBgn0000723	0.498583	0.508017	0.675722	0.25986	0.370803	0.337689	0.250899	0.333571	0.264387	380.044	447.19	554.378	282.315	414.566	411.584	285.774	444.931	367.597
FBgn0000808	0	0.00121812	0	0	0	0	0	0	0	0	1	0	0	0	0	0	0	0
FBgn0000810	0.0475662	0.0955753	0.0942861	0.020657	0.0357921	0.0377895	0.0359703	0.0385831	0.0361886	48	110	103	30	54	62	54	69	66
FBgn0000826	0.00308985	0.00812746	0.011417	0.00644092	0	0	0	0	0	1	3	4	3	0	0	0	0	0
FBgn0000927	0.00555445	0.00365257	0.00513091	0.00578924	0.00835911	0.00427045	0.00373365	0.00626847	0.00537836	4	3	4	6	9	5	4	8	7
FBgn0000928	0.00171191	0	0	0	0	0	0	0	0	2	0	0	0	0	0	0	0	0
FBgn0000964	0.0154539	0.00677494	0.0111032	0.00894844	0.0264156	0.0205946	0.0138507	0.0125959	0.019952	18	9	14	15	46	39	24	26	42
FBgn0000996	0.0760537	0.101474	0.0997817	0.0183811	0.0471833	0.0271177	0.0133364	0.0136831	0.014637	72	105	107	24	67	41	18	22	25
FBgn0001075	0.0073002	0.00893128	0.00721403	0.00224135	0.00261175	0.00187958	0.00182591	0.00134117	0.00122118	43	60	46	19	23	18	16	14	13
FBgn0001077	0	0	0	0	0	0	0	0	0	0	0	0	0	0	0	0	0	0
FBgn0001078	0.281843	0.306968	0.323943	0.126488	0.1466	0.121829	0.120943	0.110926	0.106455	531	666	661	344	412	373	339	368	364
FBgn0001079	0.00741078	0.0129954	0.0188257	0.00386202	0.0111528	0.00569766	0.00186805	0.00418172	0.00358792	8	16	22	6	18	10	3	8	7
FBgn0001083	0	0	0.00464394	0	0	0	0	0	0	0	0	8	0	0	0	0	0	0
FBgn0001084	0.00354906	0.0247646	0.00774966	0	0	0.00645003	0.00281963	0.00151197	0.00348146	1.69217	13.4668	4	0	0	5	2	1.27757	3
FBgn0001085	0.772834	1.23944	1.36645	0.26117	0.332418	0.316736	0.238998	0.283084	0.2858	989	1809	1893	481	636	659	455	642	661
FBgn0001086	0.0440523	0.0510397	0.0406932	0.0251436	0.0189417	0.0203214	0.0202185	0.00982069	0.00609368	28	37	28	23	18	21	19.1181	11.0622	7
FBgn0001087	0.417828	0.490101	0.573727	0.175077	0.247279	0.210426	0.17432	0.20631	0.162381	576	769	851.001	346	510	472	355	503	405
FBgn0001089	0.00375817	0.0223658	0.0173276	0	0.00426649	0.0116004	0.00243735	0.0160781	0.00822329	2.84489	19.3103	14.1993	0	4.82864	14.2771	2.74488	21.5692	11.2503
FBgn0001090	0.0307445	0.0112319	0.0130168	0.00890114	0.0111387	0.00493323	0.00344437	0.0063886	0.00212642	24	10	11	10	13	6	4	7	3
FBgn0001091	2.9772	3.27011	3.54222	2.14687	2.3458	2.09102	2.20625	2.21032	2.0927	1196	1498	1543	1243	1404	1364	1313	1573	1514
FBgn0001092	2.89921	4.5895	4.29656	1.16735	1.82841	1.83045	1.07928	1.41656	1.72103	1208	2181	1938	700	1139	1240	669	1046	1298
FBgn0001098	0.439314	0.763689	0.801316	0.163605	0.232085	0.193819	0.123133	0.179811	0.219418	256	501	502	135	197	179	106	181	224
FBgn0001099	0.140845	0.13554	0.165012	0.0635758	0.0413588	0.0443712	0.0531104	0.0348917	0.0722293	41	45	52	26.4464	18	21	23	18	38
FBgn0001104	0.178593	0.289291	0.290803	0.0536341	0.0769365	0.095883	0.0722326	0.0794247	0.0644828	118	218	208	51	76	103	71	93	77
FBgn0001105	2.55017	3.11975	3.42482	0.869715	0.945074	0.889516	0.748697	0.699176	0.834859	4053	5637	5752.01	2008	2195	2257	1702	1954	2315
FBgn0001108	0.0981175	0.137304	0.154861	0.0270901	0.057804	0.0503574	0.0157241	0.0447322	0.0456609	151	241	258	60	133	126	36	122	127
FBgn0001112	4.60208	4.76586	3.931	1.75858	3.352	3.12106	1.51682	2.00124	1.86909	4395	5191	4064	2417	4786	4846	2155	3387	3226
FBgn0001114	0.0101599	0.00890808	0.0187703	0.00705956	0.00308889	0.0102256	0.00434597	0.00416942	0.00306632	11	11	22	11	5	18	7	8	6
FBgn0001120	0.00390499	0	0.0288578	0.00542675	0.0052238	0.0192147	0	0	0	1	0	8	2	2	8	0	0	0
FBgn0001122	0.683449	0.755595	0.779716	0.243733	0.30415	0.268204	0.171932	0.216623	0.198403	791	1089	1082	387	601	575	331	504.001	444
FBgn0001123	0.827717	1.05818	1.20593	0.411202	0.503833	0.434981	0.390636	0.440433	0.439493	422	615	664	301	384	361	296	397	404
FBgn0001124	0.362148	0.576556	0.510605	0.209255	0.188681	0.165299	0.152465	0.150573	0.184473	190	345	290	158	148	141	119	140	175
FBgn0001125	2.09808	3.23838	3.17387	0.603346	0.558552	0.576236	0.462192	0.304764	0.360912	1010	1778	1654	418	402	451	331	260	314
FBgn0001128	2.55895	4.0434	4.60341	0.679006	1.08903	0.99199	0.691539	0.951104	0.854757	1496	2738.99	2837	572.001	980	977	570.001	980	942
FBgn0001133	0.146782	0.172571	0.147916	0.0614263	0.0546666	0.048218	0.0313935	0.0527069	0.0489143	88	118	96	53	49	47	28	56	53
FBgn0001134	0	0	0	0.00178669	0	0.00163922	0	0	0	0	0	0	3.52158	0	3.64999	0	0	0
FBgn0001137	0.0518351	0.0739405	0.0716042	0.0259221	0.0122679	0.014216	0.0314833	0.00993699	0.011945	27.8499	45.3091	41.647	20.0438	9.85443	12.4181	25.1644	9.46157	11.5988
FBgn0001138	0	0.00152452	0	0	0	0	0	0	0	0	2	0	0	0	0	0	0	0
FBgn0001139	0.80819	1.16718	1.08367	0.38178	0.380681	0.353408	0.33317	0.322316	0.383475	874.614	1457.89	1323.29	598.583	665.623	686.334	543	654.098	774.081
FBgn0001142	0.110114	0.114101	0.147953	0.00894301	0.0373038	0.0211099	0.00633477	0.0116991	0.00730023	77	93	112	9	39	24	5	14	8
FBgn0001145	2.04373	2.06055	2.34933	1.82808	2.163	1.72599	1.92399	2.21249	2.50428	1183	1363	1470	1514	1860	1616	1648	2270	2606
FBgn0001147	0.00971074	0.00973062	0.0140962	0.00578356	0.00371152	0.00511951	0.00466249	0.00391395	0.0046055	7	8	11	6	4	6	5	5	6
FBgn0001148	0.0019498	0.00512871	0.00720451	0	0.0078249	0.00119926	0.00131064	0	0.00323656	1	3	4	0	6	1	1	0	3
FBgn0001149	21.868	24.6383	26.2081	12.1226	11.0199	12.653	11.1871	11.3865	10.3281	4848	6222	6282	3869	3660	4558	3692	4481	4144
FBgn0001150	0.00715298	0.00470375	0.00825944	0.00372767	0	0.00109989	0.00240409	0.00100906	0.00296838	4	3	5	3	0	1	2	1	3
FBgn0001168	0.762182	1.05288	0.984075	0.237966	0.376254	0.415908	0.231186	0.300974	0.420113	523	826	731	235	387	465	236	366	523
FBgn0001169	0.179419	0.242254	0.313214	0.0477383	0.0809964	0.0832983	0.0402014	0.0566173	0.0508682	363	559	686	139	245	275	121	203	186
FBgn0001170	0	0	0	0	0	0	0	0	0	0	0	0	0	0	0	0	0	0
FBgn0001174	0	0	0	0	0	0	0	0	0	0	0	0	0	0	0	0	0	0
FBgn0001179	0.0415767	0.0836299	0.0429248	0.0263404	0.0229016	0.0353502	0.0279475	0.0227706	0.0284178	34	78	38	31	28	47	34	33	42
FBgn0001180	0.0243432	0.0318198	0.0369872	0.0123521	0.0113391	0.00688103	0.01179	0.0151824	0.0217519	26	39	43	19	18	12	19	29	43
FBgn0001185	0.157936	0.17228	0.19607	0.0629978	0.12518	0.0734747	0.0753931	0.0643477	0.075647	121.725	151.116	163.59	69.2188	144.244	92.069	79.6862	86.2268	105.371
FBgn0001186	2.65609	2.94936	3.06892	0.911324	0.854351	0.770601	0.914474	0.99182	0.919122	3093	3900	3999	1558	1599	1512	1605	2043	2014
FBgn0001187	0.0218486	0	0.0100913	0.00303629	0.00438412	0.00537535	0	0.0123286	0.00725348	10	0	5	2	3	4	0	10	6
FBgn0001189	0.353419	0.447199	0.482608	0.223218	0.184895	0.139236	0.168044	0.139702	0.136865	354.892	512.167	524.623	295.668	277.584	227.319	246.162	244.931	248.386
FBgn0001197	1.63412	3.11506	3.6718	0.293756	0.59947	0.511592	0.199222	0.282681	0.510452	451	1014	1119	120	251	237	83	142	254
FBgn0001202	0.165521	0.268018	0.282372	0.0844041	0.0866047	0.125617	0.061912	0.0647771	0.0915852	124	229	229	91	97	153	69	86	124
FBgn0001206	0.0188607	0.0226004	0.0133573	0.00436843	0.00294354	0.00812041	0.0025356	0.00390229	0.000695724	30	41	23	10	7	21	6	11	2
FBgn0001208	0.00425785	0	0.00983296	0.0103549	0.00284792	0.0039283	0.0100173	0.0108117	0.00235593	2	0	5	7	2	3	7	9	2
FBgn0001215	0.98489	1.68931	1.57896	0.394749	0.447146	0.449199	0.392699	0.437432	0.461023	666.001	1242	1058	390	407	472	392	482	524
FBgn0001216	0.00937716	0.011305	0.0216553	0.00895908	0.012908	0.00519304	0.00709116	0.00330706	0.00518851	8	11	20	11	16	7	9	5	8
FBgn0001217	0.040082	0.04895	0.0846302	0.0188988	0.00478738	0.0228922	0.00384897	0.0080776	0.00633655	28	39	64	19	5	26	4	10	8
FBgn0001218	146.612	271.626	274.548	44.8514	66.821	84.0716	26.3057	27.1694	37.6498	146268	307571	295547	64371.1	99113	135828	38966	47809	67523
FBgn0001220	0.814787	1.08929	0.991454	0.226613	0.193333	0.216024	0.19063	0.150793	0.180454	747	1139	984	299	265	322	260	245	299
FBgn0001222	0.158289	0.343111	0.292438	0.0590192	0.111755	0.0797797	0.0413779	0.0680376	0.0687286	145	358	288	78	152	118	56	111	113
FBgn0001223	13.5405	7.4463	14.0736	0.0510919	0.041804	0.0180903	0.14973	0.0269691	0.0223767	3683	2310	4144	20	17	8	61.0875	13	11
FBgn0001224	1.59727	0.66224	2.18081	0.00906684	0.00872777	0	0.00877122	0.00490869	0.0182696	387	183	572	3	3	0	3	2	8
FBgn0001225	20.2077	11.5779	7.71103	0.0698828	0.00498292	0	0.0876351	0.016815	0.0144273	5425	3545	2241	27	2	0	35	8	7
FBgn0001226	8.33181	2.516	9.39346	0.0588439	0.0177283	0.0601012	0.0985246	0.0330828	0.0144178	3142.89	1084.29	3868.31	34.5829	13.4344	35.288	59.932	23.1728	9.41014
FBgn0001227	0.0055291	0	0.0187275	0	0	0	0	0	0	3	0	11	0	0	0	0	0	0
FBgn0001228	0.0388176	0.326168	0.126	0.00861615	0.0165879	0.0152537	0.00101954	0.0349852	0.0205834	6	30	11	1	2	2	0.912554	5	3
FBgn0001229	1.49972	1.24573	1.45496	0.00997199	0	0.00441352	0.00241171	0	0.0218372	418	396	439	4	0	2	1	0	11
FBgn0001230	1.543	0.313519	0.199214	0.0106345	0.00837557	0.00941348	0.014964	0.00942121	0.0076985	1109	257	155	11	9	11	16	12	10
FBgn0001233	5.64093	9.83958	9.34433	0.890815	1.04254	0.909582	1.29341	1.26281	0.942708	5018	9979	8999	1140	1386	1315	1711	1990	1515
FBgn0001234	0	0	0	0	0	0	0	0	0	0	0	0	0	0	0	0	0	0
FBgn0001235	0.00749593	0.0112642	0.0124414	0.00213698	0.00262511	0.00230525	0.000309466	0.00140992	0.00320897	9	24	17	6	8	3	1	4	12
FBgn0001247	0.314057	0.358797	0.456814	0.110351	0.151996	0.129315	0.0990887	0.0901063	0.112479	359.91	468.964	566.725	182	260.424	240.942	168.934	183	232.963
FBgn0001248	7.58579	12.0818	10.81	2.83096	3.57785	3.27291	1.81057	1.66513	1.76084	3802	6914	5871	2042	2681	2668	1350	1479	1598
FBgn0001250	0.0935827	0.125474	0.123311	0.017611	0.0376925	0.0321852	0.022484	0.0210879	0.0337863	185	281	263	50	112	104	66	74	121
FBgn0001253	0.000967562	0.000848349	0.00357513	0	0.000970748	0.000595116	0.00263949	0.0155101	0.00297574	2	2	8	0	3	2	2	8	4
FBgn0001254	0.00187357	0	0.00173071	0	0	0	0	0	0	1	0	1	0	0	0	0	0	0
FBgn0001255	0.0031589	0.00553939	0.00875408	0.00219495	0.0126772	0	0.0106169	0.0124774	0	1	2	3	1	6	0	5	7	0
FBgn0001256	0	0	0.00272598	0	0	0	0	0	0	0	0	1	0	0	0	0	0	0
FBgn0001257	0.247118	0.403059	0.219206	0.0367121	0.0821861	0.0538639	0.0262306	0.0242922	0.0145115	147	295	155	33.0001	79	51	20	24	20
FBgn0001258	0.823321	0.214198	0.175277	2.22172	2.68756	2.62736	1.61038	2.1909	2.44887	347	107	80	1355	1694	1804	1010	1637	1866
FBgn0001259	0	0.0025975	0.0018244	0	0	0	0	0	0	0	3	2	0	0	0	0	0	0
FBgn0001263	0	0.00118267	0	0.00276428	0	0	0	0	0.000746343	0	1	0	3	0	0	0	0	1
FBgn0001269	0	0.00108319	0	0	0.00275124	0.000542567	0	0	0.00151344	0	2	0	0	3	1	0	0	4
FBgn0001276	0.62113	0.741785	0.865599	0.264163	0.322332	0.276648	0.183564	0.232652	0.207393	116	158	175	71	90	84	51	77	70
FBgn0001280	1.21012	1.86239	2.21918	0.492445	0.601414	0.411679	0.493338	0.435028	0.436566	197.748	348.102	393.575	115.812	146.933	109.375	119.932	125.982	128.932
FBgn0001281	0.200593	0.247203	0.172403	0.0328569	0.0156739	0.125131	0.0773946	0.150985	0.0383372	26.2518	36.8978	24.425	6.18842	3.06679	26.6247	15.0682	35.0177	9.0676
FBgn0001285	0.00471989	0.0248301	0.00871998	0.0016398	0.040464	0	0	0.00665829	0.00261158	2	12	4	1	20	0	0	5	2
FBgn0001291	0.304896	0.343976	0.406718	0.0992612	0.215342	0.21376	0.090292	0.179264	0.208814	143	184	206.502	67	151	163	63	149	177
FBgn0001296	0.0314612	0.139178	0.0898286	0.00894301	0.0571945	0.051775	0.00288381	0.0612173	0.0609276	22	111	68	9	60	59	3	76	77
FBgn0001297	0.323527	0.349705	0.351684	0.160405	0.140445	0.127714	0.143798	0.153542	0.175814	438.001	535	510	319	276	294	289	364.001	435
FBgn0001301	0.0123225	0.0258364	0.0386028	0.0100514	0.0154091	0.0138402	0.00576216	0.0157205	0.010672	23	55	78	27	43	42	16	52	36
FBgn0001308	0.307708	0.445197	0.567004	0.119466	0.167123	0.167518	0.126371	0.143711	0.142253	383	632	764	214	311	339	234	317	320
FBgn0001311	0.000537698	0.00141434	0	0	0	0	0	0	0	1	3	0	0	0	0	0	0	0
FBgn0001313	0	0	0.000396092	0	0	0	0	0	0	0	0	2	0	0	0	0	0	0
FBgn0001316	0.422627	0.59911	0.641937	0.179102	0.194465	0.151385	0.135583	0.166697	0.167663	575	958	974	335	397	362	305.001	411.001	385
FBgn0001319	0	0	0.00382938	0	0	0	0	0	0.00167892	0	0	4	0	0	0	0	0	4
FBgn0001320	0.324215	0.444659	0.40253	0.162243	0.19696	0.150018	0.0939718	0.0965084	0.161289	218	341	293	157	198	164	94	115	196
FBgn0001321	0.00913847	0.0090141	0.00105521	0.00555611	0.00458428	0.00140519	0.00537495	0.0025783	0.00316027	8	9	1	7	6	2	7	4	5
FBgn0001323	0.015241	0.0240538	0.0197104	0.00576517	0.00866504	0.0070307	0.00819592	0.0023409	0.00927638	20	36	28	8	17	15	16	4	22
FBgn0001324	0.228181	0.380615	0.402713	0.176597	0.138972	0.167731	0.160863	0.129803	0.109832	130	279	253	145	126	168	134	148	112
FBgn0001325	0	0	0.00223503	0	0.00161833	0.00123855	0	0.000378757	0	0	0	2	0	2	3	0	1	0
FBgn0001330	0.0413078	0.0659887	0.0670973	0.0066555	0.0160862	0.0120785	0.0141551	0.00861044	0.0182567	54.469	99.2409	93.1826	12	31.7128	25.8944	27.7676	20.121	43.5079
FBgn0001341	0.0690357	0.132454	0.14855	0.0203164	0.0363971	0.0194824	0.0229296	0.0320807	0.0350526	85	186	198	36	67	39	42	70	78
FBgn0001404	1.53587	1.58636	1.90749	0.816762	0.691295	0.715154	0.941194	0.724615	0.743205	1805.01	2122	2411	1379	1212	1360	1640	1492	1568
FBgn0001491	0.284645	0.435068	0.426389	0.104238	0.120922	0.0993673	0.0491268	0.0477512	0.108546	74	129	120	39	47	42	19	22	51
FBgn0001565	0.283683	0.369583	0.395298	0.169276	0.219761	0.139695	0.401848	0.263182	0.342309	186	276	288	162	213	154	400	315	409
FBgn0001612	0.00503063	0.0227892	0.0240097	0.00407811	0.0039256	0.00721975	0.0061995	0.00236555	0.00463919	6	31	31	7	7	14	11	5	10
FBgn0001624	1.00328	1.18226	1.39653	0.364087	0.419195	0.35599	0.324312	0.281965	0.335241	1853	2458.99	2768	974	1141	1052	906	954.001	1108
FBgn0001941	0.475407	0.760506	0.697273	0.13483	0.264769	0.200508	0.142174	0.163146	0.230839	245	453	396	101	205	170	109	149	218
FBgn0001942	23.6457	38.6071	41.0316	6.3084	11.9896	10.4657	6.88954	8.04441	10.1047	14129	26331	26543	5297.01	10563	10185	6146	8684	11017
FBgn0001961	0.104069	0.098006	0.135299	0.0415126	0.0296478	0.0640096	0.0471078	0.0250119	0.0394549	54	58	76	31	23	54	38	23	37
FBgn0001965	0.0119621	0.0264486	0.0389151	0.00469799	0.00974034	0.00959673	0.00524401	0.00645643	0.00920874	23	58	81	13	28	30	15	22	32
FBgn0001967	0.0173183	0	0.0159978	0	0.00579178	0	0	0	0	4	0	4	0	2	0	0	0	0
FBgn0001970	0.0432516	0.0442431	0.043949	0.00500888	0.0163933	0.0177351	0.0125985	0.0187111	0.0135613	30	35	33	5	17	20	13	23	17
FBgn0001977	0.259281	0.363967	0.331272	0.147404	0.105105	0.135313	0.11091	0.0753697	0.119553	198	317	273.858	162	120	168	126	102	165
FBgn0001978	0.228303	0.312265	0.272963	0.105458	0.0821491	0.0724317	0.0563336	0.0642195	0.0571642	316	494.001	409	211	170	163	116	158	143
FBgn0001983	0	0	0	0	0	0	0	0	0	0	0	0	0	0	0	0	0	0
FBgn0001986	0.0400786	0.0863873	0.102583	0.0121837	0.0351843	0.0174612	0.025818	0.0155481	0.0314161	48	118	133	21	63	34	46	33	68
FBgn0001987	0.0531831	0.0766607	0.0789193	0.0124247	0.0246634	0.0293294	0.013823	0.03041	0.025111	75	132	129	27	52	72	29	77	67
FBgn0001989	6.21323	7.33476	7.31871	4.18269	4.12619	3.8794	2.4211	2.69426	2.57151	1139	1531	1473	1101	1133	1153	664	870	852
FBgn0001990	0.0200402	0.0306242	0.0354186	0.0107115	0.00692254	0.00853345	0.0113984	0.00521917	0.00695819	13	22.6574	24.8725	10	6.71381	9	11	6	8.15767
FBgn0001991	0.154699	0.134691	0.133334	0.136316	0.17693	0.168813	0.16833	0.187563	0.204534	451.393	448.321	420.848	572.228	771.829	800.902	730.624	970	1077.91
FBgn0001992	0.0445689	0.0918396	0.0910889	0.0600441	0.103575	0.132441	0.168756	0.143757	0.074284	40.7978	95.8825	90.2646	79.1018	141.75	197.109	229.811	233.208	122.894
FBgn0001994	0.340369	0.390439	0.446146	0.139285	0.139026	0.162598	0.165039	0.121082	0.16451	506	662	718	298	309	393	365	319	442
FBgn0001995	0.512259	0.709332	0.836943	0.15339	0.252849	0.164897	0.194934	0.162877	0.19558	147.306	232.64	260.54	63.4806	108.707	77.094	83.3926	83.0042	101.645
FBgn0002021	0.241912	0.335406	0.425754	0.0847202	0.0878439	0.0853149	0.105789	0.0783084	0.0954251	129.118	204.176	246	65.0771	70.098	74.0343	84	74.0711	92.0497
FBgn0002022	3.57013	5.2025	5.45724	1.09467	1.56769	1.62898	0.805751	0.855893	0.956598	1892.89	3146	3132.29	835.287	1242.7	1404.23	635.551	804.215	916.646
FBgn0002023	0.005301	0.011455	0.0053082	0.00228163	0.00384353	0.00302949	0.00220724	0.00416897	0.00317954	6	15	7	4	7	6	4	9	7
FBgn0002031	1.43872	2.28295	2.35882	0.429185	0.503824	0.540519	0.440508	0.321615	0.501532	595	1095	1052	255	310	368	282	240	374
FBgn0002036	0.0555632	0.0916732	0.0635711	0.0355743	0.0326565	0.0438611	0.0377139	0.0266892	0.021836	36.417	68.5272	45.1048	33.5555	32	46.7383	36.7727	31	25.8654
FBgn0002044	0.294601	0.395911	0.426919	0.0896537	0.0869945	0.102749	0.061667	0.0745708	0.111663	410	627	643	179	181	232	128	183	281
FBgn0002069	0.713455	1.04259	1.07538	0.183737	0.234709	0.202534	0.229169	0.231791	0.162875	439.063	733.265	712.113	168.405	232	204.115	221.192	281.249	188
FBgn0002121	0.106534	0.187833	0.165266	0.0462657	0.0646733	0.0470076	0.0509843	0.0414922	0.0465792	185	372	309	115	168	135	131	131	148
FBgn0002174	0.584672	0.994577	0.947983	0.262787	0.20952	0.212041	0.22802	0.157207	0.233705	336	639	574	213	177	195	192	156	235
FBgn0002183	0.17513	0.270369	0.280349	0.0687044	0.105368	0.0994704	0.0636481	0.0737613	0.0784327	209	370	369	119	189	193	113	156	170
FBgn0002283	0.604011	0.93714	0.851444	0.0883708	0.235687	0.311749	0.0693835	0.1555	0.201984	239.92	424.551	366.12	50.5173	139.965	201.328	41	109.461	145
FBgn0002284	5.12314	7.02736	7.4563	2.17016	2.51797	2.12873	1.2576	1.34907	1.17168	1350	2112	2127	823	992	912	493	630	558
FBgn0002306	0.214093	0.320459	0.32149	0.107834	0.114665	0.0939009	0.0857959	0.0761921	0.0962994	430	743	688.001	311	327	292	262	276	340.999
FBgn0002354	0.586326	0.74648	0.489681	0.173008	0.26861	0.153144	0.20516	0.285527	0.253316	73	106	66	31	50	31	38	63	57
FBgn0002413	0.885253	1.08067	1.16236	0.317425	0.333877	0.320068	0.335756	0.372496	0.289399	1200	1655.29	1709.28	620	683	706.003	669.001	893	707.513
FBgn0002431	0.0534893	0.0795568	0.0844996	0.0145368	0.0212956	0.0213454	0.0166933	0.0138336	0.0266849	168	284.99	287.304	65.7092	100	109	78	77	151.475
FBgn0002440	0	0	0.0019077	0	0	0	0	0	0	0	0	1	0	0	0	0	0	0
FBgn0002441	0.0922647	0.140836	0.1199	0.0441179	0.0312105	0.0424871	0.0214052	0.0316354	0.0188281	169.667	295.379	238.686	116.758	85.8073	127.027	58.5581	103.096	62.5743
FBgn0002466	0	0	0	0	0	0	0	0	0.000266358	0	0	0	0	0	0	0	0	1
FBgn0002521	0.147131	0.206151	0.299805	0.0711624	0.0675363	0.0878336	0.0950215	0.101743	0.0965737	102	163	226	71	70	99	98	125	121
FBgn0002522	0	0	0	0	0	0	0	0	0	0	0	0	0	0	0	0	0	0
FBgn0002524	0.151821	0.204389	0.257299	0.0265807	0.0767601	0.0691159	0.0265177	0.0627337	0.0476246	128	198	244	32	101	97	34	93	73
FBgn0002525	0.4786	0.681903	0.804883	0.154879	0.182002	0.186356	0.185503	0.136664	0.212493	496	807	903	233	285	314	286	251	398
FBgn0002526	0.256863	0.297482	0.339324	0.0603483	0.0913336	0.090495	0.0575537	0.0832996	0.0658897	1044	1379	1493	353	555	598	348	600	484
FBgn0002531	0	0	0	0	0	0	0	0	0	0	0	0	0	0	0	0	0	0
FBgn0002533	0	0	0	0	0	0	0	0	0	0	0	0	0	0	0	0	0	0
FBgn0002534	0.00900387	0.0710506	0.0249519	0.00625631	0	0	0.018157	0	0	1	9	3	1	0	0	3	0	0
FBgn0002535	0	0	0	0	0	0	0	0	0	0	0	0	0	0	0	0	0	0
FBgn0002542	0.00352045	0.0186429	0.0163084	0.000690622	0.00552079	0.0016031	0.00150431	0.0074413	0.00261175	4.16395	25.1492	20.8816	1.1756	9.76275	3.0828	2.64698	15.5979	5.583
FBgn0002543	0.00141196	0.0152686	0.00652148	0.00196219	0.00157401	0.00086845	0.00031637	0.000531156	0	3	37	15	6	5	3	1	2	0
FBgn0002552	0.0200117	0.0213464	0.0246477	0.00309002	0.00669255	0.00888952	0.00668442	0.00250936	0.000615153	24.4554	29.7521	32.6072	5.43453	12.2277	17.6622	12.1523	5.43453	1.35863
FBgn0002561	0	0	0	0	0	0	0	0	0	0	0	0	0	0	0	0	0	0
FBgn0002562	0.0291345	0.0163487	0.0322956	0.00242929	0.00467688	0.00358394	0	0	0	25	16	30	3	6	5	0	0	0
FBgn0002563	0.103406	0.0762414	0.148709	0.00816493	0.0165051	0.00578197	0.00315948	0	0.00260072	88	74	137	10	21	8	4	0	4
FBgn0002564	0.0417573	0.0559955	0.128199	0.000853381	0.0024644	0.00604319	0	0	0	34	52	113	1	3	8	0	0	0
FBgn0002565	0.104252	0.090319	0.104328	0.00344949	0.0182627	0.00305343	0.00180563	0	0.0014863	84	83	91	4	22	4	2	0	2
FBgn0002566	0.456912	0.550177	0.689803	0.199842	0.253346	0.241017	0.210105	0.219855	0.16758	469	637.999	753	286	376	387	306	414.001	314
FBgn0002567	0.211063	0.274161	0.3081	0.0688022	0.0610006	0.068916	0.0472919	0.0573435	0.0519042	121	157	184	57.9999	49	52	32	46	42
FBgn0002569	0	0	0	0	0	0	0	0	0	0	0	0	0	0	0	0	0	0
FBgn0002570	0.0260653	0.00930389	0.00841901	0.0207007	0.022196	0.0193123	0.0189772	0.0276379	0.0164875	15	6.10657	5.24489	17.1445	19.0971	18.0693	16.2468	28.1866	17.1479
FBgn0002571	0	0.00465954	0	0	0.00829393	0	0	0	0	0	3	0	0	7	0	0	0	0
FBgn0002573	0	0	0	0	0	0	0	0	0	0	0	0	0	0	0	0	0	0
FBgn0002576	0.000972888	0.00255906	0	0	0	0	0	0	0.00107662	1	3	0	0	0	0	0	0	2
FBgn0002577	0.0017637	0	0	0	0	0	0	0	0	2	0	0	0	0	0	0	0	0
FBgn0002578	0.0180077	0.010526	0	0	0	0.00369199	0.00806977	0	0.0166065	4	2	0	0	0	2	2	0	5
FBgn0002579	196.472	265.662	281.142	77.0224	87.7201	83.7761	67.3554	62.0332	66.7237	20484	31581	31717	11533	13661	14189	10427	11443	12563
FBgn0002590	66.0456	89.9629	83.5809	22.4015	25.7116	24.4305	16.353	14.6561	17.7385	14251	22139	19522	6956	8294	8571	5249	5607	6917
FBgn0002592	0	0	0	0	0	0	0	0	0	0	0	0	0	0	0	0	0	0
FBgn0002593	215.072	308.793	299.247	84.5559	82.485	78.3383	77.9223	72.7579	66.0251	31911	52230	48204	17804	18534	19238	17155	19247	17891
FBgn0002609	0	0	0	0	0	0	0	0	0	0	0	0	0	0	0	0	0	0
FBgn0002622	35.3899	46.6823	50.9767	12.5847	13.5547	12.152	8.14138	8.03752	8.89164	10795	16368	17021	5365	6517.01	6527	3874	4356	5235
FBgn0002626	150.852	209.052	240.626	47.0398	61.4321	55.9453	46.312	44.4875	39.8159	17342	27415	29951	7784	10560	10456	7920	9063	8272
FBgn0002629	0	0	0	0	0	0	0	0	0	0	0	0	0	0	0	0	0	0
FBgn0002631	0	0	0	0	0	0.00509203	0	0.00233576	0.00229039	0	0	0	0	0	2	0	1	1
FBgn0002632	0	0	0	0	0	0	0	0	0	0	0	0	0	0	0	0	0	0
FBgn0002633	0	0	0	0	0	0	0	0	0	0	0	0	0	0	0	0	0	0
FBgn0002638	0.109643	0.195701	0.222944	0.0326507	0.0260234	0.0264934	0.0392984	0.027914	0.0298601	84	171	172	36	29	33	39	34	36
FBgn0002641	0.0742837	0.0836013	0.100369	0.0292746	0.0459777	0.0272773	0.0320465	0.0237735	0.0349675	67	86	98	38	62	40	43	38	57
FBgn0002643	0.305461	0.488504	0.520679	0.117557	0.102701	0.107145	0.0849847	0.0953889	0.12299	659	1120	1228	306	340	370	243	330	398
FBgn0002645	0.162015	0.237344	0.255632	0.0704376	0.0979331	0.0881504	0.0657914	0.0760896	0.0651458	322	538	550	171	291	277	184	268	234
FBgn0002673	0.0220471	0.0327926	0.021753	0.00991252	0.00370606	0.0087744	0.00435878	0.0039082	0.00384342	17	27	17	11	4	11	5	5	5.01454
FBgn0002707	0.120234	0.122739	0.127726	0.0525135	0.0672081	0.0544075	0.105066	0.0688142	0.0760309	140	163	161	88	117	103	182	142	160
FBgn0002709	0.00282816	0	0	0.00163761	0.000896004	0.00115967	0.000950532	0	0.00222365	6	0	0	5	2	4	3	0	8
FBgn0002715	0.00405335	0.0195467	0.0149771	0.00563292	0.00135557	0.00498617	0.0177101	0	0	2	11	8	4	1	4	13	0	0
FBgn0002716	0.052155	0.0517593	0	0.0550852	0	0.00682095	0	0	0.049802	38.7582	43.8692	0	58.9132	0	8.24118	0	0	66.8872
FBgn0002719	0.699948	0.918272	1.01208	0.199624	0.304834	0.267465	0.175559	0.209271	0.187865	536	802	839	220	349	333	200	284	260
FBgn0002723	0.250371	0.241825	0.286347	0.0740064	0.0951622	0.0679535	0.0715933	0.100016	0.0571728	357	404	450	150	214	176	145	261	156
FBgn0002732	0.00592707	0.0363776	0.0219005	0.0288289	0.0158576	0.0072911	0.0159365	0.0100335	0.0393543	1	7	4	7	4	2	4	3	12
FBgn0002733	0.130654	0.152742	0.147512	0.0655668	0.0218474	0.0357161	0.0439124	0.0430062	0.0421708	36	48	44	26	9	16	18	21	21
FBgn0002734	0	0.00913591	0	0.00482674	0	0.00213627	0	0	0	0	3	0	2	0	1	0	0	0
FBgn0002735	0	0	0	0.0110364	0.00265592	0.00244231	0	0	0.0021971	0	0	0	4	1	1	0	0	1
FBgn0002736	0.661311	1.14541	1.17578	0.212198	0.257566	0.272278	0.161007	0.122381	0.214789	211.454	417.709	406.989	97.6477	123.13	141.547	76.588	69.348	124.122
FBgn0002772	2.40913	6.63454	7.6093	0.816856	5.10547	6.62982	0.459108	1.17722	2.40949	722	2087	2290	353	2020	2772	242	665	1195
FBgn0002773	7.81785	9.64469	10.444	3.52609	5.78269	4.75101	2.22552	3.28162	3.39626	5771	8120	8346	3746	6382	5702	2444	4293	4531
FBgn0002774	0.137798	0.183623	0.226944	0.0496516	0.0619657	0.0706503	0.0542225	0.0483938	0.0404151	187	284	333	97	126	156	110	116	99
FBgn0002775	0.0673517	0.0965016	0.133051	0.044297	0.0675293	0.0405527	0.0414335	0.036498	0.0256159	42.1899	68.9443	90.2244	39.9341	63.2435	41.3007	38.6117	40.5171	29
FBgn0002778	0.507319	0.7332	0.689797	0.11052	0.10163	0.0760653	0.0952134	0.0500899	0.0790921	407	671	594	125	120	98	112	70	113
FBgn0002780	2.08457	3.20206	3.55509	0.370509	0.608789	0.551899	0.424483	0.369061	0.535707	1295	2267	2390	331	565	557	392	406	601
FBgn0002781	0.116195	0.208888	0.224391	0.0642216	0.0597035	0.0852169	0.0692198	0.0768156	0.0531111	67.6228	140.644	145.42	55.5156	53.0528	82.299	60.4355	80.6347	57.0337
FBgn0002783	0.165288	0.191851	0.218848	0.0618003	0.0647536	0.0750372	0.0634888	0.0541842	0.0657613	210	278	304	114	123	155	120	122	151
FBgn0002787	0.59828	1.28578	1.28816	0.106273	0.454326	0.397034	0.0786176	0.206872	0.2601	266	652	620	68	302	287	52	163	209
FBgn0002789	9.84617	10.8524	10.1009	6.24012	4.87215	4.93548	4.18374	3.32907	4.23521	2367	2977	2630	2160	1752	1930	1497	1419	1841
FBgn0002791	0.0552003	0.0652336	0.0532082	0.0241808	0.0296976	0.0332138	0.0225858	0.0331795	0.0278871	46	62	48	29	37	45	28	49	42
FBgn0002838	0.0055219	0.00484156	0	0	0	0	0	0	0	1	1	0	0	0	0	0	0	0
FBgn0002842	0.00746952	0	0	0	0	0.00229713	0	0	0	2	0	0	0	0	1	0	0	0
FBgn0002855	268.827	265.207	287.658	240.337	263.407	282.297	215.567	266.781	239.036	72170	81203	83600	92857	105724	123216	86094	126925	115978
FBgn0002856	108.449	145.068	145.002	57.017	77.6222	73.8586	62.4299	70.5461	91.4499	9522	14445	13957	7283	10427	10855	8776	11746	14584
FBgn0002862	0.194586	0.250898	0.359496	0.00795337	0	0	0.0153881	0	0	17	25	34	1	0	0	2	0	0
FBgn0002863	37110.1	38616.5	40551.7	23446.3	31063.3	29849	21115.5	25607.5	24494.3	587526	697286	695008	534220	735268	768319	497329	718474	700857
FBgn0002865	0	0	0	0.001754	0.00337682	0.00310523	0	0	0	0	0	0	1	2	2	0	0	0
FBgn0002868	61.22	83.6145	95.2644	27.125	30.0963	32.732	47.9786	34.0909	42.7906	3343	5089.01	5665	2040	2524	3092	3895	3493	4263
FBgn0002869	0	0	0	0	0	0	0	0	0	0	0	0	0	0	0	0	0	0
FBgn0002872	0.00716819	0.00369418	0.0155891	0.000541812	0.00428564	0.00218194	0.00170525	0.000485337	0.00242966	9.77407	5.74498	23.0109	1.06323	8.73665	4.83712	3.45907	1.17278	5.98744
FBgn0002873	0.00093865	0.00574979	0.00567911	0.000326109	0.00251131	0.00115466	0.0012619	0.00291311	0.000779051	2	16	15	1	8	4	4	11	3
FBgn0002878	0.00484423	0.0116803	0.0145433	0	0	0.000744882	0	0.000341685	0.00167524	8	22	26	0	0	2	0	1	5
FBgn0002887	0.0232629	0.0149576	0.0107445	0.0113149	0.00726117	0.00763106	0.00833979	0.00175022	0.00557772	30	22	15	21	14	16	16	4	13
FBgn0002891	0.00910749	0.00276447	0.00670971	0.00257233	0.000867357	0.00264435	0.00284592	0.00268878	0.00298986	21.1032	7.30575	16.8306	8.578	3.00476	9.96198	9.81023	11.0411	12.5207
FBgn0002899	0.0107193	0.00652707	0.00651749	0.00186207	0	0	0	0.00151216	0.00148278	12	8.33368	7.89845	3	0	0	0	3	3
FBgn0002901	0.00972294	0.00852499	0.0059877	0.00300265	0.00072259	0.0099671	0.00290475	0.00914401	0.00239104	9	9	6	4	1	15	4	15	4
FBgn0002905	0.00381046	0.0121172	0.00791089	0.00563227	0.00446899	0.0041067	0.00256532	0.00322388	0.00211279	8.38454	30.4094	18.844	17.8359	14.7019	14.6917	8.39751	12.5716	8.4021
FBgn0002906	0.0221184	0.0177562	0.0266435	0.00512806	0.00738839	0.00226472	0.00663747	0.00934964	0.00510197	36.0423	33	47	12.0261	18	6	16.0905	27	15.0254
FBgn0002909	0.00266871	0.00762882	0.00594513	0.000266557	0.00125667	0.000697224	0.00203609	0.000426861	0.000633495	3.59797	11.7315	8.67692	0.51728	2.53306	1.52827	4.08399	1.01987	1.54375
FBgn0002914	0.103482	0.164231	0.188502	0.0280009	0.0345999	0.0427882	0.0392062	0.0388958	0.0627452	96.0677	174.063	188.974	38	48.7797	65.5999	55	65	106.933
FBgn0002917	0	0	0	0	0	0	0	0	0	0	0	0	0	0	0	0	0	0
FBgn0002921	1.56454	1.85832	2.19215	0.545137	0.729243	0.609796	0.393709	0.538485	0.540698	2776	3659	4104	1370	1929	1722	1038	1689.99	1725
FBgn0002922	0	0	0	0	0	0	0	0	0	0	0	0	0	0	0	0	0	0
FBgn0002924	0.00144037	0.0051096	0.0119547	0.000977806	0	0.000837706	0.00723413	0.00585825	0	1.09077	4.41315	9.8004	1.06567	0	1.0314	8.14988	7.86204	0
FBgn0002926	0	0	0	0	0	0	0	0	0.000973935	0	0	0	0	0	0	0	0	5
FBgn0002930	0.461345	0.648242	0.559116	0.158912	0.209673	0.164919	0.0940938	0.103463	0.0861802	234	375	307	116	159	136	71	93	79
FBgn0002931	0.0111637	0.0293648	0.0296484	0.00193927	0.0037335	0.00832023	0.00938021	0	0.00231639	8	24	23	2	4	7	10	0	3
FBgn0002932	0.00522069	0.0230119	0.0205714	0.0072551	0.00957537	0.0064221	0.00501324	0.0101002	0.00264039	7	34	29	14	18.0001	14	10	24	6
FBgn0002933	0	0	0	0	0	0	0	0	0	0	0	0	0	0	0	0	0	0
FBgn0002936	0.00420716	0.0110664	0.0091321	0.00292334	0.0140701	0	0.00565604	0.00474799	0.00673137	1	3	2.34978	1	5	0	2	2	2.89163
FBgn0002937	0.00506353	0	0	0	0	0	0	0.00309928	0	3.51931	0	0	0	0	0	0	3.81746	0
FBgn0002938	0	0	0	0	0	0	0.000409223	0	0	0	0	0	0	0	0	1	0	0
FBgn0002939	0.00185027	0.0032446	0.00512755	0	0	0	0	0	0.00307134	1	2	3	0	0	0	0	0	3
FBgn0002940	0	0	0	0.00848588	0	0	0	0	0	0	0	0	6	0	0	0	0	0
FBgn0002941	0	0	0	0	0	0	0	0	0	0	0	0	0	0	0	0	0	0
FBgn0002945	0.132029	0.127943	0.177985	0.075059	0.079435	0.0586703	0.0632697	0.108007	0.072004	209	231	305	171	188	154	149	303	206
FBgn0002948	0.005191	0.00556528	0.0174109	0.00188892	0.00588316	0.00309143	0.002741	0.00383492	0.00352241	4.13118	5.05143	15	2	7	4	3	5	5.06632
FBgn0002962	0	0	0	0	0	0.000967064	0	0	0.000835386	0	0	0	0	0	1.16397	0	0	1.1177
FBgn0002973	0.0539794	0.0581381	0.0757604	0.0521884	0.0384208	0.024067	0.0208043	0.0474972	0.0280351	57	80	99	77	61	51	31	91	61
FBgn0002985	0.0618618	0.105018	0.0887567	0.0155476	0.0360948	0.0518116	0.0194644	0.0311935	0.0517866	47	91	73	17	41	64	22	42	71.1086
FBgn0002989	0.0167896	0.0467519	0.0424031	0.0081936	0.00429535	0.010518	0.00221003	0.011022	0.00535593	15.9094	50.5262	43.4968	11.1738	6.08521	16.2041	3.11544	18.509	9.17229
FBgn0003002	0	0	0	0	0	0	0	0	0	0	0	0	0	0	0	0	0	0
FBgn0003008	0.738519	1.16396	1.1677	0.317969	0.406084	0.289821	0.316738	0.15084	0.240667	163	293	279	101	134	104	104	59	96
FBgn0003009	0	0	0	0	0	0	0	0	0	0	0	0	0	0	0	0	0	0
FBgn0003011	0	0	0	0	0	0	0	0	0	0	0	0	0	0	0	0	0	0
FBgn0003015	0	0	0	0	0	0	0	0	0	0	0	0	0	0	0	0	0	0
FBgn0003016	0.460436	0.626848	0.610158	0.180151	0.158471	0.156351	0.124206	0.133433	0.12558	990	1577	1478	549	502	560	387	491	480
FBgn0003023	0.0020144	0.00264932	0.00972141	0.0013997	0.00202104	0.000619497	0.00812439	0.00397837	0.00278649	2	3	10.4486	2	3	1	12	7	5
FBgn0003028	0.0150032	0.0188824	0.0211964	0.00398599	0.00354178	0.00678526	0.00949177	0.00746992	0.00676438	34	50	53	13	12	25	32	30	25
FBgn0003034	21324	20379.1	20036.9	17110.1	18070.1	18015.9	17485.2	17662.6	17624.2	215305	234680	219010	248627	272779	295747	262641	316046	321606
FBgn0003041	0.0523369	0.0666097	0.0610531	0.029888	0.0232599	0.011857	0.0207801	0.0270433	0.0257231	65	94	81	53	46	21	42	57	56.0001
FBgn0003042	0.0549701	0.0635054	0.112057	0.020416	0.0401497	0.0353845	0.0502807	0.0380679	0.0307718	44	57.975	97.0981	23.5184	48.0476	46.0486	59.8734	54	44.5151
FBgn0003044	0.142543	0.174736	0.204063	0.0342669	0.0515116	0.0394739	0.04314	0.0312585	0.0370058	211	295	327	73	114	95	95	82	99
FBgn0003046	0.0108949	0	0.0100641	0	0	0	0	0	0	2	0	2	0	0	0	0	0	0
FBgn0003048	0.0608604	0.0798252	0.0816836	0.0285767	0.022908	0.0232291	0.017878	0.022111	0.0197937	254.531	380.76	369.818	172	144.287	159.106	111.232	163.879	150.492
FBgn0003053	0.00508253	0.00928632	0.00553184	0.00160253	0.00130685	0.00311281	0.00157794	0.0017623	0.00306419	13.0179	25.0203	14.016	5.01281	5.00484	11	6.0131	8	14.0367
FBgn0003057	0.00560955	0	0	0.0103941	0	0	0.0012569	0	0	3	0	0	8	0	0	1	0	0
FBgn0003060	0.536328	0.436658	0.14863	1.12865	1.13768	0.947221	0.592275	0.73065	0.894511	70	65	21	216	223	210	117	176	221
FBgn0003062	1.52857	2.36811	2.19153	0.184335	0.214619	0.141414	0.366839	0.345012	0.306157	605	1069	939	105	127	91	216	242	219
FBgn0003065	0.00291165	0	0.0080689	0.00202315	0	0	0	0	0	1	0	3	1	0	0	0	0	0
FBgn0003067	1.96248	3.0929	1.81113	0.229347	0.184802	0.207576	0.17118	0.104634	0.164505	1587.5	2853.5	1586	267	223.5	273	206	150	240.5
FBgn0003068	0.0273257	0.0223375	0.012627	0.00185241	0.00230082	0.00442931	0.00313602	0.00564118	0.00325301	41	39	20.9255	4	5.26592	11.0241	7	15	9
FBgn0003071	0.132801	0.161402	0.138298	0.083115	0.0857215	0.07147	0.0911129	0.0766566	0.081786	155	215	174	140	150	136	155	159	173
FBgn0003074	0.612246	0.679961	0.65228	0.258086	0.308496	0.268622	0.268877	0.223407	0.232618	453	572	519	273	339	321	294	291	309
FBgn0003076	0.30267	0.381482	0.284357	0.330998	0.342776	0.352228	0.420776	0.41921	0.336846	176	253	179	277	298	333	364	432	354
FBgn0003079	0.130786	0.140697	0.144805	0.0689631	0.0421881	0.0530578	0.0604796	0.0601911	0.0538895	142	179	172	111	73	96	97	124	108
FBgn0003082	0	0	0	0	0	0	0	0	0	0	0	0	0	0	0	0	0	0
FBgn0003086	0.00575807	0	0.0265951	0	0	0	0	0	0	1	0	5	0	0	0	0	0	0
FBgn0003087	0	0	0	0.00536011	0	0	0	0	0	0	0	0	2	0	0	0	0	0
FBgn0003089	0	0.00212237	0	0	0	0.00123629	0	0.00243561	0.0031737	0	1.30568	0	0	0	1.0842	0	2	3.09389
FBgn0003090	0.0319015	0.0364252	0.0594191	0.0120696	0.0156561	0.0133016	0.00514166	0.0150833	0.0102264	55	70	109	30	39.9999	37	13	45	31
FBgn0003091	0.183011	0.24219	0.402564	0.0751612	0.116727	0.113388	0.0796349	0.109266	0.122574	259	412	631	146	226	234	167	280	285
FBgn0003093	0.370191	0.531744	0.584008	0.188494	0.271418	0.208081	0.156527	0.178873	0.185715	683	973.999	1106	506	666	626	439	552	588
FBgn0003114	0	0	0	0	0	0	0	0	0	0	0	0	0	0	0	0	0	0
FBgn0003116	0.0286462	0.0635348	0.0449024	0.0249756	0.0142781	0.0392272	0.0370716	0.0272363	0.0358814	14.5804	36.8823	24.7411	18.2948	10.8651	32.4613	28.0705	24.5675	33.0065
FBgn0003117	0	0.00294987	0	0	0	0	0	0	0.000620522	0	3	0	0	0	0	0	0	1
FBgn0003118	0.0912735	0.10466	0.12613	0.0284768	0.0477733	0.0358525	0.0254499	0.0172421	0.0297856	120.765	160	179	54	94.9999	77	47	38	71
FBgn0003124	0.00133045	0	0	0	0	0	0	0	0	1	0	0	0	0	0	0	0	0
FBgn0003129	0.0465191	0.0693511	0.0385975	0.0158232	0.0308191	0.0217278	0.00696991	0.014239	0.0108797	38.9467	66.2212	34.982	19.0653	38.5766	29.5755	8.68108	21.1266	16.4621
FBgn0003130	0	0.00233746	0	0	0	0	0	0	0	0	2	0	0	0	0	0	0	0
FBgn0003132	0.00333989	0	0	0	0	0	0	0	0.000924002	2	0	0	0	0	0	0	0	1
FBgn0003134	5.34821	6.47671	6.1726	2.86997	2.41006	2.17237	2.31116	1.8699	1.96973	4553	6140	5849	3377	3272	3068	2968	3053	3198
FBgn0003137	0.00315317	0.00311026	0.00983049	0.000273872	0.00421808	0.0036364	0.000794826	0	0.00239895	8	9	27	1	16	15	3	0	11
FBgn0003139	0.331166	0.387729	0.466336	0.0841854	0.137763	0.113021	0.0950137	0.0991304	0.09497	164	219	250	60	102	91	70	87	85
FBgn0003140	0	0	0	0	0	0	0	0	0	0	0	0	0	0	0	0	0	0
FBgn0003141	1.56564	2.30303	1.80185	0.793435	0.506291	0.461592	0.637101	0.359587	0.490421	484	812	603	353	234	232	293	197	274
FBgn0003145	1.48591	2.56612	2.50747	0.501491	0.611408	0.632411	0.44055	0.451422	0.502114	1120	2206	2049	544	689	775	494	603	684
FBgn0003149	1.29023	1.74257	1.67512	0.479158	0.725398	0.699453	0.28095	0.439308	0.527619	1405	2120	1987	753	1169	1230	462	845	1026
FBgn0003159	0.153871	0.190712	0.211912	0.0532839	0.0667979	0.0789147	0.0595383	0.0559422	0.0575385	259	366	386	129	168	216	149	166	175
FBgn0003162	0.0425678	0.0625736	0.0726863	0.00508604	0.0110156	0.0101297	0.0013327	0.00103257	0.00767906	24	39	43	4	9	9	1	1	7
FBgn0003165	0.677346	0.832717	0.802145	0.182462	0.231811	0.209491	0.146831	0.172894	0.148376	1340	1931	1830	529	718	738	451.999	620.001	599
FBgn0003169	0.0787212	0.138044	0.152709	0.0171912	0.0443796	0.0338932	0.0219222	0.0437857	0.0342237	88	158	161	24	72	49	36	71.0001	63
FBgn0003174	0.00535232	0.00260715	0.0120858	0.00247936	0	0	0.000799508	0.000671151	0	9	5	22	6	0	0	2	2	0
FBgn0003175	0.243407	0.317865	0.364211	0.0979763	0.119236	0.107454	0.0868433	0.101659	0.0913564	380	577	638	224	281	272	219	284	265
FBgn0003187	0	0.00161648	0.000851527	0	0	0	0	0.00104032	0	0	2	1	0	0	0	0	2	0
FBgn0003189	0.0618295	0.108794	0.0974082	0.00706224	0.0130297	0.0138051	0.0173646	0.00979754	0.0121847	146	293	250	24	46	53	61	41	52
FBgn0003204	0.353651	0.465896	0.621534	0.0720097	0.0964028	0.125504	0.15803	0.150018	0.148683	280.28	430.227	533	83	114	163	185	209	213.104
FBgn0003205	0.212162	0.331174	0.476597	0.0938127	0.115031	0.0978703	0.0929147	0.0580448	0.0889332	132	235	321	84	107	99	86	64	100
FBgn0003206	0.123355	0.263413	0.349198	0.0373265	0.146384	0.249642	0.0307599	0.0595019	0.0726574	62	151	190	27	110	204	23	53	66
FBgn0003209	0.105352	0.173991	0.156306	0.0501178	0.0599926	0.068905	0.0564575	0.0681628	0.0720444	144	277	226	103	128	157	110	173	181
FBgn0003210	0.234902	0.287486	0.261551	0.0670372	0.080429	0.0593402	0.0601521	0.044972	0.0471931	353	523	420	143	178	145	128	128	127
FBgn0003218	0.079202	0.0646446	0.0852182	0.0282598	0.0275591	0.0207089	0.032139	0.0321498	0.026316	155	160	196	95.9999	99	73	97	119	111
FBgn0003227	0.0444313	0.198422	0.0323615	0.0039632	0.067876	0.0724007	0.00638896	0.00485305	0.0979329	61.7937	314.737	48.7226	7.93252	141.135	163.71	13.2188	11.9613	246.157
FBgn0003231	0.18444	0.198787	0.250075	0.0634597	0.0771918	0.0781921	0.0531219	0.116769	0.11164	143.261	176.103	210.277	70.9385	89.6413	98.7447	61.3839	160.735	156.719
FBgn0003248	0	0	0	0	0	0	0.00162987	0	0	0	0	0	0	0	0	1	0	0
FBgn0003249	0	0	0	0	0	0	0	0	0	0	0	0	0	0	0	0	0	0
FBgn0003250	0.00491689	0.0193999	0.00681296	0	0	0.00302422	0	0.00277448	0.00136029	2	9	3	0	0	2	0	2	1
FBgn0003254	0	0	0	0	0	0.00046285	0	0	0.000416378	0	0	0	0	0	1	0	0	1
FBgn0003255	0.00327035	0	0.000503496	0.000757464	0.000729137	0.00100574	0.00109915	0	0.000693955	6	0	1	2	2	3	3	0	2.30101
FBgn0003256	0.305347	0.459039	0.581192	0.146103	0.150703	0.201282	0.152319	0.147256	0.17905	255	403.482	485.644	194.749	204.786	281	191.846	257	270
FBgn0003257	0.415943	0.717846	0.737333	0.133257	0.192863	0.244494	0.186889	0.185206	0.192881	270.703	532.837	519.481	124.813	187.659	258.705	180.946	213.611	226.87
FBgn0003261	1.73739	2.10843	2.17585	0.632022	0.69564	0.704607	1.09514	1.00258	1.00055	1790	2576	2744	907	1231	1309	1632	1902	1957
FBgn0003267	0.00291465	0.0547161	0.00269241	0.0075412	0.0175455	0.0283702	0.0137144	0.004934	0.0096763	1	23	1	4	9	17	7	3	6
FBgn0003268	0.00495213	0.00789451	0.000415865	0.00125126	0.000903352	0.0013845	0.000907849	0.000508065	0.000249098	11	20	1	4	3	5	3	2	1
FBgn0003270	0	0	0	0.00334665	0	0	0	0	0	0	0	0	1	0	0	0	0	0
FBgn0003274	231.629	387.58	425.561	87.0484	120.89	108.178	70.2361	82.9057	75.6288	33181	63323	65994	17946	25891	25195	14968	21047	19580
FBgn0003275	2.97601	4.25468	4.69636	1.17754	1.03398	1.12369	1.51701	1.21749	1.10693	360	587	615	205	187	221	273	261	242
FBgn0003277	0.37281	0.532786	0.59368	0.1163	0.189767	0.176367	0.128789	0.15204	0.179	862	1405	1486	387	656	663	443	623	748
FBgn0003278	0.0478904	0.0692465	0.0807162	0.0216005	0.0202308	0.0160198	0.0225905	0.0274974	0.0246389	57	94	104	37	36	31	40	58	53
FBgn0003279	34.3409	48.4526	48.5686	9.52635	12.79	12.6184	8.45778	7.68041	9.99689	14588	23475	22335	5824	8123	8715	5345	5782	7675
FBgn0003285	0.0070073	0.0112701	0.0112198	0.00340244	0.0004094	0.00430997	0.0018841	0.00241768	0.00304807	15	21	26	8	1	15	6	7	9
FBgn0003292	0.000921217	0	0	0	0	0.00056661	0	0	0.000509721	1	0	0	0	0	1	0	0	1
FBgn0003295	0	0	0.00489988	0	0	0	0	0.00598621	0.000978321	0	0	3	0	0	0	0	6	1
FBgn0003300	0	0	0	0	0	0	0	0	0	0	0	0	0	0	0	0	0	0
FBgn0003301	0.0452083	0.0652109	0.0761542	0.0129269	0.0208023	0.0205846	0.0130072	0.0186305	0.0143324	126	212	228	51	83	90	53	94	70.9999
FBgn0003302	0.0347324	0.0730383	0.088609	0.024556	0.0340724	0.0248418	0.0288458	0.0248249	0.0167607	15	33	38	14	22	16	17	19	12
FBgn0003308	0.00136646	0.0011981	0.00504908	0	0.00228494	0.0012607	0	0	0.000378041	2	2	8	0	5	3	0	0	1
FBgn0003310	0.383399	0.523797	0.541939	0.129475	0.151825	0.132321	0.0929909	0.108968	0.131533	679	1058	1039	330	402	381	245	342	421
FBgn0003312	0	0	0.00829617	0	0	0.00220956	0	0.00608129	0	0	0	5	0	0	2	0	6	0
FBgn0003313	0	0	0	0	0	0	0	0	0	0	0	0	0	0	0	0	0	0
FBgn0003317	0.0714458	0.0783039	0.0801404	0.037233	0.0503475	0.0353122	0.0420221	0.0230372	0.0218837	56	70	68	42	59	45	49	32	31
FBgn0003319	0	0	0.000890879	0	0.000588557	0	0	0.00114591	0.000584361	0	0	1.22189	0	1.11485	0	0	2.57291	1.33806
FBgn0003321	0.033018	0.0498833	0.0584884	0.00828895	0.0337572	0.0365668	0.0141869	0.0183482	0.0314796	33	62	69	13	55	63	23	33	62
FBgn0003326	0	0	0	0.000733837	0	0	0	0	0	0	0	0	1	0	0	0	0	0
FBgn0003330	0.0926265	0.145816	0.194463	0.0190158	0.0422416	0.0284858	0.0254711	0.0415759	0.0232961	44	79	100	13	30	22	18	35	20
FBgn0003334	0.0305058	0.0316143	0.0443023	0.0152997	0.0154598	0.0146228	0.0042903	0.0110579	0.0130476	41.7575	49.3559	65.6484	30.1403	31.6388	32.5433	8.73663	26.8246	32.2783
FBgn0003339	0.00223908	0.00261761	0.0027578	0.000518607	0.00199685	0.000459062	0	0.000842305	0.000412971	3	4	4	1	4	1	0	2	1
FBgn0003345	1.26247	1.95231	1.84862	0.483804	0.563362	0.477458	0.409559	0.418876	0.419031	1778	3161	3040	962.999	1186	1141	861.309	1202	1131
FBgn0003346	0.0712254	0.153474	0.163137	0.0380082	0.0427788	0.0393382	0.0399206	0.0343934	0.0363195	49	112	120	37	44	44	38.9999	39	44
FBgn0003353	0.00224649	0.000984853	0.00437707	0	0.00375649	0	0	0.00063382	0.000621508	2	1	5.02462	0	5	0	0	1	1
FBgn0003356	0	0	0	0	0.228919	0	0	0	0	0	0	0	0	80.26	0	0	0	0
FBgn0003357	0.0162952	0	0	0	0.210993	0	0	0.010002	0.00601089	6	0	0	0	114.185	0	0	4	4
FBgn0003358	0	0	0	0	0.0106837	0	0	0.00450657	0	0	0	0	0	4	0	0	2	0
FBgn0003360	32.1331	51.7731	58.6009	5.92654	11.5013	9.15243	4.28139	6.20618	6.23866	17056.1	31599	33917.1	4457	9192.99	7968	3381	5951	6031
FBgn0003366	0.00283714	0.00590801	0.00196561	0.000492845	0.000237207	0.00327194	0.00166872	0	0.000392457	8	19	6	2	1	15	7	0	2
FBgn0003371	2.18582	2.59435	2.73284	0.974445	1.05377	0.917781	0.948167	0.985764	0.906806	3095	4190	4200	1982	2239	2106	1986	2447	2332
FBgn0003372	0	0	0	0	0	0	0	0	0	0	0	0	0	0	0	0	0	0
FBgn0003373	0	0.00272404	0	0	0	0	0	0	0	0	1	0	0	0	0	0	0	0
FBgn0003374	0	0	0	0.00260887	0	0.00230933	0	0	0	0	0	0	1	0	1	0	0	0
FBgn0003375	0	0	0	0	0	0	0	0	0	0	0	0	0	0	0	0	0	0
FBgn0003377	0.115869	0.243824	0	0.0483069	0.0620006	0.0142535	0	0	0.0128224	5	12	0	3	4	1	0	0	1
FBgn0003378	0	0	0	0	0	0	0	0	0	0	0	0	0	0	0	0	0	0
FBgn0003380	0.0354719	0.0352353	0.0368216	0.0173295	0.0139229	0.0114962	0.00616727	0.0157277	0.0118736	62	97	110	44	36	29	19	57	24
FBgn0003382	0	0	0	0	0.00100016	0	0	0	0	0	0	0	0	3	0	0	0	0
FBgn0003386	0.0252991	0.0481074	0.0346413	0.0112179	0.0202412	0.0147637	0.0193474	0.0156442	0.00867788	32	69	47	24	43.0001	37	39	41	22
FBgn0003388	0	0	0.00103186	0	0	0.000687051	0	0	0	0	0	1	0	0	1	0	0	0
FBgn0003390	0.0700353	0.0468627	0.051075	0.0435413	0.041913	0.0362749	0.0458382	0.0270394	0.0581271	38	29	30	34	34	32	37	26	57
FBgn0003391	0.10304	0.107534	0.134351	0.0424513	0.0375093	0.0297253	0.0306472	0.0409058	0.0413725	226	269	319	134	123	106	100	159	164
FBgn0003392	0.288018	0.417278	0.410124	0.129365	0.146106	0.146803	0.150609	0.15338	0.136748	376	617	576	240	265	306	295	359	331
FBgn0003396	0.0739643	0.110036	0.131917	0.0241494	0.0420225	0.0562998	0.0263837	0.0435417	0.0442192	245	415	470	115	207	302	130	255	264
FBgn0003401	0.455758	0.518989	0.581722	0.0959245	0.108781	0.116316	0.0750002	0.0448185	0.0544116	241	313	333	73	86	100	59	42	52
FBgn0003410	0.412642	0.512717	0.590185	0.222305	0.19395	0.195592	0.190368	0.189258	0.158306	436	607	669	333	300	332	293	348	298
FBgn0003411	0.716552	1.23516	1.42289	0.00677408	0	0.0149908	0.00982981	0.0330067	0.0161828	147	289	316	2	0	5	3	12	6
FBgn0003415	0.138866	0.183263	0.213345	0.0621666	0.0921839	0.0773857	0.0659496	0.0759828	0.0620507	524	785.999	888	339	524	475	367	507.263	427
FBgn0003416	0.0211564	0.0402665	0.0386097	0.00896369	0.0138056	0.0120605	0.000693714	0.00815279	0.00599581	41	89	81	25	40	38	2	28	21
FBgn0003423	1.15133	1.63737	1.7951	0.391314	0.441909	0.439416	0.280392	0.34945	0.3265	1010	1624	1682	500	597	613	369	534	511
FBgn0003429	0.010732	0.025399	0.0209217	0.00312222	0.00692517	0.00974821	0.00173992	0.00292117	0.00247048	18	65	54.9999	11	19	28	6	8	9
FBgn0003430	0.0207544	0.00808769	0.00852083	0	0	0.00141837	0	0.00650622	0.00255193	9	4	4	0	0	1	0	5	2
FBgn0003435	2.0106	2.95785	3.75715	0.7941	0.998456	1.05772	0.671749	0.890288	0.834632	3205	5204.99	5942	1541	2203.99	2588.99	1427	2226	2253
FBgn0003444	0.00308744	0.00730062	0.00180376	0.00206525	0.00192592	0	0.000689131	0	0.00100511	4.15959	11.218	2.63073	4.00439	3.87931	0	1.38121	0	2.44735
FBgn0003447	0.0633249	0.0606479	0.109793	0.0149248	0.0182455	0.0185757	0.0163717	0.0109947	0.0134764	65	74	122	24	30	31	25	20	25
FBgn0003448	0	0	0	0	0	0	0	0	0	0	0	0	0	0	0	0	0	0
FBgn0003449	1.36026	2.06963	2.25438	0.586874	0.686832	0.727287	0.609572	0.649669	0.678862	306	531	549	190	231	266	204	259	276
FBgn0003450	0	0	0	0	0	0	0	0	0	0	0	0	0	0	0	0	0	0
FBgn0003459	0.0113789	0.00983193	0.0103585	0.00406876	0.0126568	0.00484531	0.00963853	0.00158188	0.00726471	15	16	16	8	27	11	18.9999	4	17
FBgn0003460	0.00655713	0.0153313	0.0181714	0.0022781	0.00804066	0.00672179	0.000734608	0.00308335	0.00120938	6	16	18	3	11	10	1	5	2
FBgn0003462	7.53748	9.64264	9.93711	3.66508	3.93727	3.50381	2.79037	2.67277	2.87184	1429	2085	2039.45	1000	1116	1080	787	898	984
FBgn0003463	0.140604	0.174644	0.183338	0.0531603	0.0568955	0.0523195	0.049397	0.0687322	0.0736163	279	395	394	152	169	169	146	242	264
FBgn0003464	0.0407175	0.0382878	0.0528759	0.0209118	0.0299973	0.02577	0.0287711	0.0263057	0.0186114	69	74	97	51	76	71	75	79	57
FBgn0003475	0.051618	0.0683855	0.0719505	0.0152821	0.0159337	0.0250282	0.0169437	0.0168946	0.0122396	58.9999	90	96	23	29	48	34	43	27
FBgn0003479	0.0366491	0.0413146	0.0483636	0.0272845	0.00525283	0.0193214	0.00703863	0.00590861	0.015933	14	18	20	15	3	12	4	4	11
FBgn0003480	0	0.00695531	0	0	0	0.00171018	0	0.00134627	0.00158769	0	3.32491	0	0	0	1.16541	0	1	1.20269
FBgn0003482	0	0	0	0	0	0	0	0	0	0	0	0	0	0	0	0	0	0
FBgn0003483	0	0	0	0	0	0	0	0	0	0	0	0	0	0	0	0	0	0
FBgn0003486	0.00359948	0.0182643	0.00677801	0.0149177	0.007549	0.00224589	0.00849908	0.0107632	0.00291591	2.53103	14.6475	5.15948	15.0963	7.93616	2.56758	8.89071	13.4124	3.70562
FBgn0003495	0.334346	0.467827	0.448075	0.186578	0.232901	0.212038	0.105968	0.136451	0.159118	218	335	309	171	210	208	102	159	183
FBgn0003499	0	0.00441367	0.00484021	0.00226114	0.000870634	0.0013812	0.00174994	0.000422379	0.00372757	0	11	9	5	2	3	4	1	9
FBgn0003502	0.600781	0.895877	0.980903	0.308988	0.407734	0.384428	0.294792	0.304695	0.396798	731	1260	1344	545	768.999	778.999	544	694	890.001
FBgn0003507	0.223667	0.337362	0.284709	0.0642341	0.104544	0.0755003	0.0364478	0.0440984	0.0749521	246	426	338	107	170	137	64	85	149
FBgn0003510	0.00207883	0.00729081	0.00576096	0.000481491	0.00185394	0.000852415	0.00186317	0.00469213	0.00268391	2.28015	9.12059	6.84044	0.760049	3.0402	1.5201	3.0402	9.12059	5.32034
FBgn0003511	0.0672025	0.128218	0.117313	0.0550647	0.0284451	0.0466772	0.0590366	0.047934	0.034176	26.7199	60.8794	52.1595	30.2399	17.9598	29.4799	34.9598	37.8794	26.6796
FBgn0003512	0.205692	0.323892	0.325727	0.103547	0.0673859	0.114896	0.0860625	0.0793517	0.0731649	98	176	168	71	48	89	61	67	63
FBgn0003513	0.00170143	0	0	0	0	0	0	0.000320025	0	3	0	0	0	0	0	0	1	0
FBgn0003514	3.12878	5.10798	4.80224	1.45491	1.73057	1.70731	1.06424	1.12736	1.36524	913	1701	1517	611	755	812	462	586	721
FBgn0003515	0	0	0	0	0	0	0	0	0	0	0	0	0	0	0	0	0	0
FBgn0003517	61.7624	99.9675	111.991	17.5863	25.8907	24.3533	19.8795	22.0292	18.8955	18264	33719	35852.1	7484	11447	11708	8745	11549	10100
FBgn0003520	0.233451	0.273618	0.279402	0.100914	0.107978	0.0893272	0.0814873	0.099221	0.113897	389	520	504	244	269	242	202	293	343
FBgn0003525	0.584817	0.705135	0.873095	0.219039	0.192954	0.178619	0.194814	0.160232	0.175269	495	681	799	268	245	247	245	242	268
FBgn0003527	0.0145433	0	0.00268687	0.0121264	0	0.00536706	0.00391035	0	0.00965639	5	0	1	6	0	3	2	0	6
FBgn0003545	0.0176334	0.0012884	0	0.00306312	0	0	0.0019755	0	0	12	1	0	3	0	0	2	0	0
FBgn0003557	0.19407	0.211769	0.184643	0.103217	0.0865591	0.123337	0.0645777	0.0412117	0.0744415	286	377	312	201	202	313	144	114	210
FBgn0003559	0.0646816	0.144525	0.135882	0.0326205	0.0495451	0.0372454	0.0322582	0.05357	0.0438706	62	158	141	45	71	57	46	91	76
FBgn0003567	0.252647	0.333987	0.291793	0.0786409	0.0778123	0.0618523	0.0627061	0.0385672	0.0465738	282	415	350	126	131	113	101	77	92
FBgn0003575	0.243375	0.334063	0.305874	0.0995902	0.1361	0.0955669	0.107022	0.131665	0.109554	386	605	525	226	329	245	253	374	313
FBgn0003598	0.0693402	0.101669	0.10788	0.0246977	0.043591	0.0369037	0.020759	0.0374829	0.0274746	119	199	200.424	61	111.846	102.97	53	114	85.2162
FBgn0003607	2.95758	4.02271	4.39581	0.985799	1.28572	1.09029	1.49	1.35221	1.20548	832	1296	1343	401	540	499	625	675	615
FBgn0003612	0.238732	0.386699	0.470206	0.0927299	0.122881	0.107041	0.0946401	0.101657	0.128499	191	361	420	108	159	141	117	149	187
FBgn0003638	10.2402	12.2985	12.9624	6.32432	7.42477	7.10874	6.92517	6.73493	7.11773	10873	14890.3	14901	9660	11782	12271	10942	12673	13654
FBgn0003651	0	0.0162202	0.00998986	0	0.00775006	0	0.00235932	0	0.00116872	0	23	14	0	15	0	4	0	2
FBgn0003654	0.308439	0.430904	0.479213	0.106211	0.157082	0.123604	0.0842366	0.114684	0.136139	288.971	459.863	486.331	142.711	219.264	187.624	117	189.697	230.717
FBgn0003655	0.00775429	0	0	0.00215522	0	0	0	0	0.00085811	5	0	0	2	0	0	0	0	1
FBgn0003656	0.324856	0.440043	0.425989	0.10951	0.158042	0.122769	0.152026	0.165922	0.109899	318	455	401	155	217	196	197	252	184
FBgn0003660	3.60984	3.99373	4.17608	1.61997	1.60546	1.5367	1.02928	1.24356	1.65548	793	1009	993	518	534	558	344	490	666
FBgn0003676	1.62026	2.37782	2.28765	0.366124	0.421817	0.373712	0.511356	0.314977	0.390856	987	1647	1504	320	383	369	462	339	429
FBgn0003683	0	0	0	0	0	0	0	0	0	0	0	0	0	0	0	0	0	0
FBgn0003687	0.447404	0.646845	0.613338	0.195125	0.218072	0.19175	0.190363	0.208144	0.134312	188	310	279	118	137	131	119	155	102
FBgn0003701	0.00407869	0.000641033	0	0.000897229	0	0	0.000867974	0	0	6	1.1324	0	2	0	0	2	0	0
FBgn0003710	0.00176867	0	0	0.00630484	0.00709797	0.00543925	0.0115227	0.00948113	0.00565984	2	0	0	12	12	10	20	19	12
FBgn0003714	1.35268	1.73628	2.23452	0.271095	0.501283	0.344788	0.524257	0.395394	0.31017	222	325	397	66	123	94	128	119	92
FBgn0003716	0.0740893	0.165084	0.202164	0.0227249	0.0750167	0.0785442	0.0278857	0.0350058	0.0587203	82.2554	208.547	253.137	37	126.144	150.111	49	73	119
FBgn0003719	0	0.00156891	0	0	0	0	0	0	0	0	2	0	0	0	0	0	0	0
FBgn0003720	0	0	0	0	0	0	0	0	0	0	0	0	0	0	0	0	0	0
FBgn0003721	10.5398	14.2755	14.7364	4.42007	5.59173	4.56694	3.6228	3.42552	3.73368	4807	7621	7713	2784	3771	3361.99	2367	2750	3052
FBgn0003731	0.104704	0.101075	0.11404	0.0218072	0.0293229	0.0367625	0.0169908	0.0246499	0.0292128	218	240	257	64	91	122	52	91	109
FBgn0003733	0.00290765	0.0067983	0.00626717	0.00202036	0	0.00119226	0.00195449	0	0	3	8	7	3	0	2	3	0	0
FBgn0003741	0.255377	0.271504	0.240185	0.0824546	0.124137	0.0629727	0.0545205	0.0573362	0.105785	54.0801	59.4492	55.8801	24.4827	35.035	17.6722	18	19.5387	35
FBgn0003742	0.208094	0.239345	0.251633	0.0700521	0.112389	0.0796385	0.108577	0.0946141	0.0954084	87	114	114	42	70	54	67.9999	70	72
FBgn0003744	0.185816	0.198916	0.227533	0.0765675	0.0903237	0.0671118	0.0515592	0.0707137	0.0639602	172	210	228	102	125	101	71	116	107
FBgn0003747	0	0	0	0	0	0	0	0	0	0	0	0	0	0	0	0	0	0
FBgn0003748	2.07994	2.78641	2.58308	0.731909	0.726288	0.693975	0.573354	0.616457	0.695582	1870.54	2837.04	2524.4	949.18	989.957	1019.47	780.298	981.961	1134.6
FBgn0003751	0.0455335	0.0508115	0.0191188	0.00287625	0.0110748	0.0203681	0.00556495	0	0.00916155	11	14	5	1	4	8	2	0	4
FBgn0003861	0	0	0	0	0	0	0	0	0	0	0	0	0	0	0	0	0	0
FBgn0003862	0.117651	0.150805	0.156499	0.0446898	0.0689496	0.0541623	0.0499913	0.063816	0.0597009	545	790	790	305	484	399	347	520	497
FBgn0003863	0	0	0.0197552	0	0.0171651	0	0.00862525	0	0	0	0	5	0	6	0	3	0	0
FBgn0003865	0	0	0	0	0	0	0	0	0	0	0	0	0	0	0	0	0	0
FBgn0003866	0.00187109	0.00382796	0.00288069	0.000433373	0.000417167	0	0	0.000351936	0	3	7	5	1	1	0	0	1	0
FBgn0003867	0	0	0.00888311	0	0	0.00591472	0	0	0	0	0	4	0	0	4	0	0	0
FBgn0003870	0.596199	0.605732	0.726972	0.287346	0.262714	0.278124	0.229657	0.252295	0.218321	898	1039	1182	625	585	683	516	672	595
FBgn0003882	0.0453731	0.0397827	0.0289057	0.0043486	0.010465	0.0144349	0.00841364	0.0141257	0.0155827	29	29	20	4	10	15	8	16	18
FBgn0003884	11.0394	14.6897	12.6798	4.98887	3.44596	3.28063	1.67404	1.69086	2.06698	6064	9203	7540	3943.9	2830	2929.86	1368	1646	2052
FBgn0003885	1.43345	2.4232	2.24064	0.560447	0.705017	0.539098	0.338257	0.308137	0.368027	903	1741	1528	508.101	664	552.141	317	344	419
FBgn0003886	0	0.00546409	0	0	0	0.00255537	0	0	0	0	3	0	0	0	2	0	0	0
FBgn0003888	0.0842135	0.111288	0.13191	0.0195195	0.0481632	0.0375336	0.0270831	0.032368	0.029038	69	104	117	23.0172	59	50	33.0125	47	43
FBgn0003889	0	0.00150967	0.0079526	0.00957117	0	0.00317709	0	0	0.000952701	0	1	5	8	0	3	0	0	1
FBgn0003890	1.02038	1.71218	1.58677	0.248488	0.490004	0.42044	0.147999	0.229744	0.231298	542.094	1037.44	912.582	189.988	389.202	363.154	116.971	216.304	222.08
FBgn0003891	0.40783	0.501865	0.552384	0.122014	0.166991	0.153851	0.100487	0.102854	0.13659	1244	1746	1824	536	762	763	456	556	753
FBgn0003892	0.0860595	0.114582	0.135931	0.0328521	0.0486789	0.0336546	0.0303526	0.0290768	0.0290998	162	246	277	89	137	103	85	97	99
FBgn0003896	0	0	0	0.00128734	0	0	0.000622683	0	0	0	0	0	2	0	0	1	0	0
FBgn0003900	0.0990532	0.142786	0.18145	0.0489954	0.0381797	0.0413047	0.0428838	0.0587353	0.0427312	60	97	117	42	34	40	38	66.3013	46
FBgn0003916	0	0	0	0	0	0	0	0	0	0	0	0	0	0	0	0	0	0
FBgn0003920	0	0	0	0	0	0	0	0	0	0	0	0	0	0	0	0	0	0
FBgn0003922	0	0	0	0	0	0	0	0	0	0	0	0	0	0	0	0	0	0
FBgn0003923	0	0	0	0	0	0	0	0	0	0	0	0	0	0	0	0	0	0
FBgn0003930	0	0	0	0	0	0	0	0	0	0	0	0	0	0	0	0	0	0
FBgn0003931	0	0	0	0	0	0	0	0	0	0	0	0	0	0	0	0	0	0
FBgn0003933	0	0	0	0	0	0	0	0	0	0	0	0	0	0	0	0	0	0
FBgn0003934	0	0	0	0	0	0	0	0	0	0	0	0	0	0	0	0	0	0
FBgn0003935	0	0	0	0	0	0	0	0	0	0	0	0	0	0	0	0	0	0
FBgn0003936	0	0	0	0	0	0	0	0	0	0	0	0	0	0	0	0	0	0
FBgn0003938	0	0	0	0	0	0	0	0	0	0	0	0	0	0	0	0	0	0
FBgn0003941	115.786	188.94	187.061	40.8748	49.1946	38.2546	31.5543	27.7929	31.5348	16245.9	30219.9	28459	8199	10398	8830	6552.97	6948	8044
FBgn0003942	85.183	119.194	124.162	30.0069	35.2461	32.3715	23.5982	20.8407	25.9887	11841	18897	18684	6002.97	7325	7316	4880	5134	6529
FBgn0003943	1.9809	3.13007	3.43876	1.01821	1.37087	1.37321	0.92789	1.12757	1.0631	1702.08	3069.05	3203.02	1256.9	1764.98	1922.98	1185.01	1719.99	1651.99
FBgn0003944	0.00678221	0.0110437	0.0143201	0	0.00146307	0.00238372	0.00147035	0.00437375	0.00268049	7	13	18	0	2	4	2	8	5
FBgn0003950	0	0	0	0	0	0	0	0	0	0	0	0	0	0	0	0	0	0
FBgn0003961	0	0	0	0	0	0	0	0	0	0	0	0	0	0	0	0	0	0
FBgn0003963	0.0275117	0.0464987	0.0621661	0.0131247	0.00861658	0.00785001	0.0072851	0.0100569	0.00967311	44	82	106	32	22	22	17	27	28
FBgn0003964	0.311287	0.461311	0.523229	0.108573	0.151053	0.150166	0.0787743	0.144654	0.129686	263.303	431	464	129.215	188.144	201.505	96	210	192
FBgn0003965	0	0.0067239	0	0	0	0	0	0.00288486	0.00141441	0	3	0	0	0	0	0	2	1
FBgn0003969	0.0560712	0.115993	0.0920789	0.023133	0.0837978	0.0802913	0.0270901	0.0632791	0.086288	73	169	146	44	147	171	50	155	191
FBgn0003975	0.00173236	0.00075946	0	0	0	0	0.00116448	0	0.000479269	2	1	0	0	0	0	2	0	1
FBgn0003977	0.0247631	0.0495498	0.0336422	0.0130223	0.00743427	0.0127609	0.00609194	0.0122121	0.00725576	49.6451	113.297	73.0132	37.5724	22.2829	41.5938	18.1691	43.3882	26.2895
FBgn0003978	0.110335	0.125422	0.147621	0.0237795	0.0420133	0.0534849	0.0314407	0.0278304	0.0262506	43.358	56.2123	62.7986	13.4484	24.6834	34.1715	18.3804	19.3814	18.6433
FBgn0003979	0	0	0	0	0	0	0	0	0	0	0	0	0	0	0	0	0	0
FBgn0003980	0	0	0	0.00899076	0	0	0	0	0	0	0	0	2	0	0	0	0	0
FBgn0003983	0.0484112	0	0.0178879	0	0	0.0119105	0	0	0.0160719	5	0	2	0	0	2	0	0	3
FBgn0003984	0.0196054	0.0185975	0.0292963	0.00762427	0.0112558	0.00730856	0.00729342	0.00954521	0.0120875	34	36	55	17	28	20	17	26	36
FBgn0003996	0.00393945	0.00230272	0.0181953	0.00364976	0.000878317	0	0	0	0.000726584	3	2	15	4	1	0	0	0	1
FBgn0003997	0.22862	0.197962	0.301696	0.0355206	0.0322926	0.0480366	0.0181357	0.0424672	0.0416423	195	201	294	50	63	83	29	67	65
FBgn0004003	19.2656	22.1291	23.0371	6.40932	8.18856	8.10884	3.00439	3.52283	4.54985	5138	6731	6651	2460	3265	3516	1192	1665	2193
FBgn0004034	0	0	0	0	0	0	0	0	0	0	0	0	0	0	0	0	0	0
FBgn0004045	0	0.0162727	0	0.00286577	0	0	0	0.00349087	0	0	9	0	2	0	0	0	3	0
FBgn0004047	0.00438668	0	0	0.00152404	0	0	0	0	0	2	0	0	1	0	0	0	0	0
FBgn0004049	0.202727	0.223044	0.311632	0.0581948	0.0722482	0.0885832	0.0678725	0.0746429	0.0550029	259	325	431	107	138	184	129	169	127
FBgn0004050	0.141808	0.206106	0.159318	0.0541498	0.0521248	0.0479324	0.0515254	0.0353236	0.042413	111	184	135	61	61	61	60	49	60
FBgn0004052	0	0	0	0	0	0	0	0.00628081	0	0	0	0	0	0	0	0	1	0
FBgn0004053	0	0	0	0	0	0	0	0	0	0	0	0	0	0	0	0	0	0
FBgn0004054	0	0	0	0	0	0	0	0	0	0	0	0	0	0	0	0	0	0
FBgn0004055	0.0824188	0.114966	0.114201	0.0112802	0.0175404	0.0284189	0.0117518	0.00634184	0.00967345	66	105	99	13	21	37	14	9	14
FBgn0004057	0.0371536	0.10083	0.112768	0.00737603	0.0213006	0.0293811	0.00951404	0.0269548	0.0371995	21	65	69	6	18	27	8	27	38
FBgn0004066	2.7867	4.01644	4.49084	0.961128	1.04712	1.12487	0.532976	0.623761	0.736534	963	1583	1680	478	541	632	274	382	460
FBgn0004087	1.09233	1.2457	1.40474	0.287727	0.367698	0.259083	0.326336	0.169201	0.359481	153	199	213	58	77	59	68	42	91
FBgn0004101	0.0597463	0.0781598	0.0899963	0.0210373	0.0165832	0.0167259	0.0159779	0.020158	0.0268474	45	66	71	23.0001	21	21	17	28	37
FBgn0004102	0	0	0	0	0	0	0	0.000376611	0	0	0	0	0	0	0	0	1	0
FBgn0004103	2.83004	5.08145	5.06428	0.887154	1.46827	1.39791	0.899954	1.27132	1.29346	2006	4108	3886	905	1556	1611	949	1597	1657
FBgn0004106	0	0	0	0	0	0	0	0	0	0	0	0	0	0	0	0	0	0
FBgn0004107	0.0751327	0.155799	0.159726	0.0247961	0.0342234	0.0296058	0.0100979	0.0236611	0.0061588	27	74	67	15	20	27	8	19	4
FBgn0004108	0.0226905	0.0268109	0.0235395	0.00851798	0.0140176	0.0121619	0.0166005	0.0127224	0.0120008	31.7739	42.8195	35.6837	17.1662	29.3471	27.6889	34.5823	27.1275	30.3716
FBgn0004110	0	0	0	0	0	0	0	0	0	0	0	0	0	0	0	0	0	0
FBgn0004117	2.81874	4.08485	4.78262	0.711085	2.13078	1.86637	0.42597	1.16235	1.4047	1508	2438	2720	571	1687	1623	374	1105	1318
FBgn0004118	0	0	0	0.00116036	0	0	0	0	0	0	0	0	1	0	0	0	0	0
FBgn0004132	3.31428	5.27682	5.28016	0.933615	1.1758	1.3085	0.771462	0.717107	0.944796	592	1075	1021	240	314	380	205	227	305
FBgn0004133	1.25528	2.17664	1.95764	0.691652	1.00925	0.833791	0.591328	0.719484	0.649567	929.52	1832.49	1580.39	736.155	1115.2	1001.01	649.402	945.01	869.952
FBgn0004143	0	0	0	0	0	0	0	0	0	0	0	0	0	0	0	0	0	0
FBgn0004167	0.0257264	0.0239599	0.0378152	0.0119461	0.0194745	0.0134932	0.010374	0.0126369	0.0112362	118	125	187	79	133	100	70.9999	103	92.9999
FBgn0004168	0.0217027	0.0298288	0.0373865	0.0101892	0.00902353	0.0151525	0.0078856	0.00893647	0.00519281	37	58	69	25	23	42	20	27	16
FBgn0004169	10.3962	11.6071	11.1958	4.66269	4.76209	4.37515	2.5314	2.91148	3.79305	5268	6724	6157.01	3395	3616	3601	1907	2619	3476
FBgn0004170	0	0	0	0	0	0	0	0	0	0	0	0	0	0	0	0	0	0
FBgn0004171	0	0	0	0	0	0.00200568	0	0	0	0	0	0	0	0	1	0	0	0
FBgn0004172	0.0177812	0.0311808	0	0	0.0237864	0.0109366	0.0239048	0	0.00983858	1	2	0	0	2	1	2	0	1
FBgn0004173	0	0.0688577	0	0	0	0.0966071	0	0	0	0	6	0	0	0	12	0	0	0
FBgn0004174	0.0883504	0.030986	0	0.012278	0.0590943	0.0760781	0.0237554	0	0	5	2	0	1	5	7	2	0	0
FBgn0004175	0	0.0114763	0.0241818	0.00909482	0	0	0.0175966	0	0	0	1	2	1	0	0	2	0	0
FBgn0004177	2.09141	2.55249	2.82034	0.866621	0.849528	0.879792	0.870176	0.677927	0.882684	1616	2587	2761	886	1180	1397	913	993	1451.01
FBgn0004179	0.637863	0.804962	1.00652	0.188004	0.36503	0.426558	0.170397	0.300393	0.313342	462	662	780	193	398	496	181	380	405
FBgn0004181	0.00212572	0.156561	0.00785457	0.0221558	0	0.0222269	0.00428668	0.00839645	0.00940953	1	84	4	15	0	17	3	7	8
FBgn0004183	0	0	0	0	0	0	0	0	0	0	0	0	0	0	0	0	0	0
FBgn0004185	0	0	0	0	0	0	0	0	0	0	0	0	0	0	0	0	0	0
FBgn0004186	0	0	0	0	0	0	0	0	0	0	0	0	0	0	0	0	0	0
FBgn0004187	0	0	0	0	0	0	0	0	0	0	0	0	0	0	0	0	0	0
FBgn0004188	0	0	0	0	0	0	0	0	0	0	0	0	0	0	0	0	0	0
FBgn0004189	0	0	0	0	0	0	0	0	0	0	0	0	0	0	0	0	0	0
FBgn0004190	0	0	0	0	0	0	0	0	0	0	0	0	0	0	0	0	0	0
FBgn0004191	0	0	0	0	0	0	0	0	0	0	0	0	0	0	0	0	0	0
FBgn0004192	0	0	0	0	0	0	0	0	0	0	0	0	0	0	0	0	0	0
FBgn0004197	0.00316479	0.00138743	0.00185485	0	0	0	0	0	0	6	3	4	0	0	0	0	0	0
FBgn0004198	0.0107647	0.00536275	0.00858793	0.00271995	0.00278187	0.00150478	0.00230236	0.00220883	0.00216592	44	25	38	16	17	10	14	16	16
FBgn0004227	0.203061	0.339563	0.352471	0.093744	0.133854	0.100187	0.107196	0.114154	0.104337	217	443	425	134	210	195	163	221	209
FBgn0004228	0	0	0	0	0	0	0	0.0117736	0.00306132	0	0	0	0	0	0	0	4	1
FBgn0004237	1.04039	1.71137	2.23398	0.286543	0.647691	0.546561	0.288427	0.644001	0.481762	672.001	1284	1553	283	622	535	295	645	525
FBgn0004240	0	0	0	0	0.0254682	0.0292749	0.0319938	0	0	0	0	0	0	4	5	5	0	0
FBgn0004242	0.0436852	0.0417471	0.0552758	0.0174362	0.066276	0.0795458	0.0154727	0.0272302	0.0294691	68	74	93	39	154	201	36	75	83
FBgn0004244	0.00405743	0.00236513	0.00249182	0	0	0	0.0002266	0.0001902	0.00037318	5	8.00001	8.00001	0	0	0	1	1	2
FBgn0004359	0.0987089	0.118974	0.106023	0.0469688	0.0331936	0.0465809	0.0427253	0.0224766	0.0403964	78.3528	107.989	91.3416	53.6569	39.3933	60.1158	50.4543	31.6187	58.1026
FBgn0004360	0.0555392	0.043825	0.0525874	0.0318373	0.00557212	0.00939398	0.00279992	0.0133191	0.0107556	40	36	41	33	6	11	3	17	14
FBgn0004362	0.326419	0.646144	0.88315	0.0876654	0.0994698	0.0630879	0.169151	0.104855	0.120981	130	284	375	50	57.9999	40	99.0001	71	85.0001
FBgn0004363	26.6807	33.8239	36.4329	10.3201	9.86589	8.69591	6.16502	4.9807	5.65426	12300	18123	18478	6694.99	6941	6649	4227	4158	4753
FBgn0004367	0	0.00321932	0	0.000765383	0.000982346	0.000903339	0.000740427	0	0	0	10	0	3	4	4	3	0	0
FBgn0004368	0.0927982	0.149861	0.142823	0.0347082	0.0365088	0.0289608	0.0226998	0.0199096	0.0213631	198	359	337	103	116	100	73	74.9999	85
FBgn0004369	0.144986	0.265276	0.276534	0.0631032	0.0940111	0.0935698	0.0950168	0.0959958	0.105985	290.928	604.968	595	184	281	304	282.976	339	384
FBgn0004370	0.12319	0.164831	0.170421	0.0478015	0.0591115	0.0447596	0.048911	0.0539971	0.0415976	309	475	470	179	226	185	184	243	194
FBgn0004372	0	0	0	0	0	0	0	0	0	0	0	0	0	0	0	0	0	0
FBgn0004373	0.140226	0.21024	0.24929	0.0455633	0.0674976	0.0578313	0.0444051	0.0638039	0.0578738	346	587	663	152	249	232	163	279	257
FBgn0004374	0.0016665	0.00146117	0	0	0.000557329	0	0	0.00423163	0	2	2	0	0	1	0	0	9	0
FBgn0004378	0	0	0	0	0	0	0	0	0	0	0	0	0	0	0	0	0	0
FBgn0004379	0.00373312	0	0	0	0	0	0.000703863	0	0.000579383	3.56514	0	0	0	0	0	1	0	1
FBgn0004380	0.0400421	0.0680893	0.0627689	0.0101175	0.0211015	0.0358234	0.0171283	0.0157478	0.0201417	33	64	56	12	26	48	21	23	30
FBgn0004381	0.0265179	0.0393473	0.0358017	0.0177172	0.0204655	0.0167742	0.0068558	0.00748168	0.018623	26	44	38	25	30	27	10	13	33
FBgn0004387	0.0866387	0.112993	0.112676	0.0493792	0.0528534	0.0349025	0.0385006	0.0496762	0.0487112	163	243	230	134	149	107	108	166	166
FBgn0004389	0	0	0	0	0	0	0	0.00384879	0	0	0	0	0	0	0	0	2	0
FBgn0004390	0.0388843	0.0610841	0.0613622	0.0105073	0.022396	0.0176052	0.0170621	0.0103612	0.0122517	72	129	123	28	62	53	47	34	41
FBgn0004391	0.018002	0.0382762	0.0345058	0.00437802	0.0114388	0.0074739	0.00181512	0.00812646	0.00921369	40	97	83	14	38	27	6	32	37
FBgn0004394	0.00240273	0.00144625	0	0	0	0.00152182	0	0	0	3	2	0	0	0	3	0	0	0
FBgn0004395	0.0654631	0.0905865	0.134778	0.0393478	0.0677344	0.0503875	0.0654384	0.060383	0.0640073	127	207	262	113	177	143	191	191	227
FBgn0004396	13.3172	15.2861	15.6523	4.85733	3.96544	3.34351	3.27522	2.3551	2.84457	15622	20745	20276	7970	7142	6694	5704	4878	6151
FBgn0004397	0.24967	0.352338	0.428317	0.0837122	0.170706	0.125289	0.0857777	0.0943688	0.0842031	315	507	585	152	322	257	161	211	192
FBgn0004400	0.00206215	0.00180808	0.00571474	0.00573153	0	0	0.00138616	0	0.00114102	1	1	3	4	0	0	1	0	1
FBgn0004401	1.33032	2.16225	2.55783	0.505084	0.801921	0.540236	0.490964	0.601451	0.533691	1154	2126	2384	628	1034	760	628	920	831
FBgn0004403	110.748	156.187	154.822	47.6207	54.3419	45.8973	37.1401	33.2418	35.1638	17393.4	27977.2	26322.1	10762.9	12761.2	11718.9	8677.1	9251.63	9980.43
FBgn0004404	19.3591	27.922	31.5408	8.12893	10.0533	9.62942	7.37606	8.65507	8.23355	2490.61	4091.82	4387.91	1502.08	1935.82	2017.05	1408.9	1970.37	1915.57
FBgn0004406	0.0089366	0.00284928	0.00375235	0	0.00163019	0.00249846	0.0010922	0	0.000899043	11	4	5	0	3	5	2	0	2
FBgn0004407	0.0505924	0.14527	0.098139	0.0198545	0.0235399	0.0239768	0.0200994	0.0190458	0.0424563	24.5338	80.3452	51.5189	13.8564	17.0666	18.9037	14.5	16.3677	37.2091
FBgn0004414	4034.48	4147.41	3831.28	4316.66	3756.33	3608.75	2196.38	2523.3	2676.41	279119	335668	298279	415537	396849	419914	223093	319284	338513
FBgn0004419	0.778947	0.928915	0.788524	0.228559	0.255105	0.228859	0.193977	0.20269	0.265177	392	539	450	166	190	188	144	185	243
FBgn0004425	11.0896	15.631	18.7753	4.36792	5.75031	5.54214	6.27144	6.06021	5.00254	1125.74	1809.73	2063.27	638.128	873.726	914.699	947.103	1090.24	917.789
FBgn0004426	0	0	0	0	0	0	0	0	0	0	0	0	0	0	0	0	0	0
FBgn0004427	40.4534	64.5097	68.9792	23.2032	24.0189	20.7333	23.2492	22.561	22.3951	4020.71	7312.68	7421.85	3318.99	3569.15	3350.37	3437.65	3973.89	4022.8
FBgn0004428	4.02596	5.6447	6.05862	1.4121	2.11494	2.23608	1.62723	1.74552	1.97656	542.545	867.584	883.865	273.869	426.117	489.926	326.228	416.869	481.398
FBgn0004429	0	0	0	0	0.00454571	0	0.013705	0	0	0	0	0	0	1	0	3	0	0
FBgn0004430	0.0482911	0.076159	0.115945	0.0671604	0.148506	0.0534262	0.0779529	0.141615	0.14421	5.00468	9.0019	13.0079	10.0169	23.0099	9.00203	12.0184	26.0093	27.0105
FBgn0004431	0	0	0.00715516	0.00538214	0	0	0	0	0	0	0	1	1	0	0	0	0	0
FBgn0004432	9.54531	12.8964	12.9035	2.7319	3.1387	3.19587	2.53178	2.35667	2.85118	3470.76	5348.2	5079.11	1429.59	1706.27	1889.3	1369.52	1518.6	1873.65
FBgn0004435	0.602331	0.71622	0.899125	0.281903	0.289923	0.284047	0.24415	0.268574	0.243326	678.826	971.067	1181.71	465.808	554.145	540.962	415.252	540.223	517.611
FBgn0004436	0.629603	1.04886	0.858543	0.204156	0.409086	0.42044	0.187423	0.345118	0.376569	318	579	443	147	304	329	152	293	350
FBgn0004449	0.0242073	0.0296262	0.03098	0.0105127	0.00927631	0.0133382	0.00779698	0.00825266	0.00865044	96	134	133	60	55	86	46	58	62
FBgn0004456	0.214308	0.305085	0.35105	0.0752738	0.139404	0.129279	0.0653001	0.0754714	0.111738	364	591	644	184	354	357	165	226	343
FBgn0004463	0.0500467	0.0557803	0.0611184	0.00766225	0.0119146	0.0229561	0.00969316	0.0186672	0.0159578	59	75	78	13	21	44	17	39	34
FBgn0004465	0.473145	0.68869	0.706196	0.160333	0.272818	0.151959	0.159805	0.167029	0.168943	203	337	328	99	175	106	102	127	131
FBgn0004507	0.134401	0.234841	0.269588	0.0520304	0.129064	0.0850273	0.0561417	0.0709635	0.0982689	140	279	304	78	201	144	87	131	185
FBgn0004509	0.115621	0.114919	0.154997	0.0809587	0.049526	0.0545642	0.0463115	0.0586368	0.064036	187	232	299	179	129	161	125	180	200
FBgn0004510	0.0113278	0.0313942	0.0372436	0.00869528	0.0120901	0.00407128	0.013226	0.014791	0.0178191	6.64714	21.0108	23.6584	7.34314	10.6067	3.88414	11.5458	15.3813	18.8974
FBgn0004511	0	0.000639545	0	0	0.00146364	0	0	0.00164636	0	0	1	0	0	3	0	0	4	0
FBgn0004512	0.770558	1.04607	1.24838	0.276911	0.264682	0.32961	0.242373	0.259539	0.275776	951.137	1467.44	1675.61	502.327	502.474	668.308	458.65	575.889	629.937
FBgn0004513	0.0208306	0.0176343	0.0245504	0.0109803	0.0187372	0.0150212	0.0140022	0.0186446	0.0178849	29	28	37	22	39	34	29	46	45
FBgn0004514	0.0138251	0.0177927	0.0105174	0.00791098	0.00979088	0.00650251	0.00163993	0.00229443	0.00269982	17.0001	25	14	14	18	13	3	5	6
FBgn0004516	0	0	0	0	0	0	0	0	0	0	0	0	0	0	0	0	0	0
FBgn0004552	0	0	0.0774966	0.0291466	0	0.0309601	0	0.0284034	0	0	0	10	5	0	6	0	6	0
FBgn0004554	0	0	0.0301053	0	0	0	0	0	0	0	0	4	0	0	0	0	0	0
FBgn0004556	0.0436038	0.0604303	0.0519728	0.00488677	0.0131713	0.0173028	0.0208007	0.010318	0.0179003	31	49	40	5	14	20	22	13	23
FBgn0004567	0	0.00115458	0	0	0	0	0	0	0	0	1	0	0	0	0	0	0	0
FBgn0004569	0.0323357	0.051978	0.0378353	0.0164768	0.00144187	0.00596658	0.00724525	0.00547386	0.00178917	30	55	38	22	2	9	10	9	3
FBgn0004573	0.0494614	0.0433673	0.0353335	0.0238286	0.0313185	0.0251489	0.0252681	0.0219557	0.0207994	75	75	58	52	71	62	57	59	57
FBgn0004574	0.0649135	0.15042	0.143485	0.0153035	0.0387666	0.0513336	0.029609	0.036629	0.0609315	56	148	134	19	50	72	38	56	95
FBgn0004575	0.00431832	0.00932286	0.0097467	0.00339	0.00212427	0.00348627	0.00214724	0	0.00124041	8.5596	21.0762	20.9143	9.67047	6.29523	11.2351	6.3318	0	3.17727
FBgn0004577	0	0	0	0	0	0	0	0	0	0	0	0	0	0	0	0	0	0
FBgn0004580	0.0094162	0.00825604	0.00312646	0.00163571	0.0110217	0.00579159	0.00316475	0.00132833	0.0182354	4	5	3	1	7	7	2	2	16
FBgn0004581	0	0	0.00264796	0.00348569	0.00335526	0.00220391	0.00240858	0.0020219	0.000396521	0	0	4	7	7	5	5	5	1
FBgn0004583	0.0200634	0.0171579	0.0310165	0.0108811	0.00750817	0.0089751	0.00928125	0.00315451	0.00762686	45.3888	44.8038	76.8752	35.6459	25.7007	33.409	31.6126	12.3683	30.496
FBgn0004584	0.0522867	0.0905974	0.108099	0.028546	0.0366379	0.0206742	0.0242679	0.0175619	0.00826597	42	83	94	33	44	27	29	25	12
FBgn0004587	2.10496	2.96811	2.60974	0.442657	0.710173	0.626166	0.733278	0.625071	0.664109	1043	1660	1428	337	535	539.001	555	577	640
FBgn0004588	0	0	0.0367836	0	0	0	0	0	0	0	0	3	0	0	0	0	0	0
FBgn0004589	0	0	0	0	0	0	0	0	0	0	0	0	0	0	0	0	0	0
FBgn0004590	0	0	0	0	0	0	0	0	0	0	0	0	0	0	0	0	0	0
FBgn0004591	0	0	0	0	0	0	0	0	0	0	0	0	0	0	0	0	0	0
FBgn0004592	0	0	0	0	0	0	0	0	0	0	0	0	0	0	0	0	0	0
FBgn0004593	0	0	0	0	0	0	0	0	0	0	0	0	0	0	0	0	0	0
FBgn0004594	0	0	0	0	0	0	0	0	0	0	0	0	0	0	0	0	0	0
FBgn0004595	0.000607037	0.00129696	0.000475489	0	0.000172144	0.000326437	0.000416415	0.00124457	0.000213609	5	12	4	0	2	1.99999	5	6	3
FBgn0004597	0.231587	0.283071	0.348347	0.0624968	0.0718438	0.0781698	0.0822235	0.0857977	0.0678551	77.2445	107.684	125.78	30	35.8266	42.3906	40.7996	50.7152	40.9038
FBgn0004598	0.0086211	0.0231528	0.030918	0.00360191	0.00657018	0.00315859	0.00306796	0.00443639	0.00673436	17	52	66	10	19	10	9	15	24
FBgn0004606	0.016991	0.0196021	0.021891	0.00310688	0.00448604	0.00467528	0.00450838	0.00327996	0.00519548	38	50	53	10	15	17	15	13	21
FBgn0004607	0.0460498	0.0476674	0.0514827	0.0217067	0.023884	0.0198347	0.0207191	0.0281055	0.0226535	176.181	207.936	200.398	118.045	136.057	116.422	120.316	193.114	157.362
FBgn0004611	0.08103	0.117681	0.127139	0.0541593	0.0742199	0.052595	0.0501215	0.0686531	0.0557689	168	269.23	269	154.631	213	161	150	251.634	191
FBgn0004618	0	0.00265216	0	0	0	0	0	0	0	0	3	0	0	0	0	0	0	0
FBgn0004619	0.000782945	0	0	0.000544027	0	0	0	0.00132539	0	1	0	0	1	0	0	0	3	0
FBgn0004620	0.028698	0.0405841	0.0648326	0.00578924	0.0266253	0.0204982	0.00808958	0.0104474	0.00964974	31	50	75.8141	9	43	36	13	20	18.8389
FBgn0004622	0	0	0	0	0	0	0.0014205	0	0	0	0	0	0	0	0	2	0	0
FBgn0004623	0.00223142	0.0195649	0.00618382	0.0015505	0.00597006	0.00823486	0	0.00125914	0.00246935	1	10	3	1	4	6	0	1	2
FBgn0004629	18.9969	20.7965	22.1027	12.4004	12.1689	12.8498	10.8958	11.8446	10.7747	1915	2391	2412	1799	1834	2106	1634	2116	1963
FBgn0004635	0.0982008	0.061653	0.0783938	0.176904	0.130555	0.120055	0.142613	0.179235	0.17307	85	60	70	213	162	162	178	274	262
FBgn0004636	2.78618	3.47943	3.58811	0.815129	0.938111	1.01065	0.690237	0.695032	0.883702	2482	3528	3457	1045	1248	1462	911	1092	1423
FBgn0004638	1.08147	1.17885	1.2685	0.537739	0.4816	0.45893	0.460172	0.545332	0.425919	668.488	845.07	809.493	439.365	445.114	448.654	387.125	519.847	441.067
FBgn0004643	0.185793	0.319859	0.246613	0.0838452	0.0788763	0.071906	0.0867617	0.0536084	0.0680682	155.616	305.552	223.607	101.068	98.7717	97.9187	108.108	79.5728	103.038
FBgn0004644	0.019534	0.0616579	0.0168415	0.00271462	0	0	0	0.00734834	0.00072056	15	54	14	3	0	0	0	10	1
FBgn0004646	1.73886	2.16852	2.63364	0.624876	0.840738	0.823188	0.66827	0.912538	0.800531	1207	1719	1979	624	875	932	691	1122	1006
FBgn0004647	0.00852341	0.0149465	0.0146972	0.00315865	0.00120549	0.00139799	0.0036286	0.00336668	0.00314408	30	60	56	16	6	8	19	21	20
FBgn0004648	0.379482	0.587419	0.66903	0.145166	0.172146	0.188971	0.103614	0.176024	0.13605	608.999	1085	1173	344	423	508	245	485	405
FBgn0004649	0	0	0	0	0.000311278	0.000572486	0.000312828	0	0.000515007	0	0	0	0	1	2	1	0	2
FBgn0004650	0	0	0	0	0	0	0	0	0	0	0	0	0	0	0	0	0	0
FBgn0004652	0.11866	0.0998036	0.119762	0.0812604	0.0774877	0.0903706	0.039374	0.0894103	0.0789124	218.255	201.356	215.133	219.166	200.138	267.223	104.074	268.287	243.319
FBgn0004654	0.556374	0.811931	0.951232	0.0694439	0.301221	0.239768	0.0675578	0.17391	0.233944	289.088	481.156	535.052	51.9288	233.998	202.549	52.221	160.139	219.687
FBgn0004655	0.100672	0.129828	0.160805	0.0352674	0.046574	0.0492961	0.038065	0.0404749	0.0336541	240	353	415	121	166	190	135	171	145
FBgn0004656	1.0525	1.33264	1.50407	0.436605	0.435672	0.372715	0.39425	0.399787	0.376637	3154	4557.01	5001	1713	2037	1876	1671	2171	2118
FBgn0004657	0.248009	0.405083	0.466239	0.0823006	0.119572	0.127603	0.0647817	0.096309	0.0907746	339	630.001	690	161	243.999	284.001	135	232	223
FBgn0004666	0.0768522	0.0889879	0.121635	0.0470733	0.072193	0.0635724	0.0530442	0.0376891	0.0438267	79	102	138	71	110	102	79	70	77.0001
FBgn0004687	0.530945	2.34891	2.12366	0.174163	0.94641	1.01451	0.221022	0.325452	0.703876	197	994	853	93	525	612	122	214	472
FBgn0004698	0.051742	0.0621242	0.0972407	0.0234443	0.022915	0.0213986	0.0276337	0.025832	0.0280652	82.0635	112.375	166.956	53.5124	54.3362	55.1785	65.2008	71.3207	80.4459
FBgn0004777	0	0	0	0.00656286	0.00210581	0	0	0	0.00522606	0	0	0	3	1	0	0	0	3
FBgn0004778	0	0	0	0	0	0	0	0	0	0	0	0	0	0	0	0	0	0
FBgn0004779	0.0254704	0.0133993	0.00470565	0.0212376	0.0511086	0.0250656	0	0.0258701	0.00845586	5	3	1	6	15	8	0	9	3
FBgn0004780	0.474719	0.488512	0.867297	0.72202	1.48103	1.23876	0.921776	1.19649	1.2282	90	105.629	178	197	419.792	381.832	259.979	402	420.829
FBgn0004781	0.0328364	0.0719767	0.0272993	0.0114081	0.0461224	0.0464522	0.0728388	0.0778207	0.0599571	10	25	9	5	21	23	33	42	33
FBgn0004782	0.00890461	0	0.0411281	0.00309367	0.00299479	0.00276803	0.00300235	0	0.00247758	2	0	10	1	1.00564	1.0108	1.00319	0	1.00571
FBgn0004783	0.0799212	0.111114	0.133812	0.0104124	0.10759	0.0404244	0.0168483	0.0591905	0.111011	16	25.3706	29	3	32.2028	13.1577	5.01789	21	40.1655
FBgn0004784	0	0	0	0	0.000878725	0	0	0	0.000726921	0	0	0	0	1	0	0	0	1
FBgn0004795	1.48649	2.11403	2.49734	0.568852	0.877486	0.754265	0.638604	0.807227	0.656495	1759	2845	3195	967	1551	1454	1122	1691	1400
FBgn0004797	0.00401974	0.00939858	0.0201116	0	0.00312049	0.00164827	0.00104534	0.000877517	0	3	8	14	0	3	2	1	1	0
FBgn0004811	0.444826	0.634708	0.581436	0.176739	0.161692	0.180631	0.18136	0.177588	0.184736	209	355	305	122	115	136	124	165	157
FBgn0004828	11.435	13.6436	16.305	4.78759	5.35827	5.06857	5.48681	5.44442	5.15076	7745	10535	11954	4667	5424	5580	5528	6534	6304
FBgn0004832	0.0144393	0.0405128	0.0346795	0.0120397	0.0193158	0.0248672	0.0174708	0.00325909	0.0207726	5	16	13	6	10	14	9	2	13
FBgn0004837	0.0801609	0.0672169	0.094934	0.0330911	0.0261209	0.0278127	0.0317775	0.0226164	0.022177	78	73	100	46	38	44	46	39	39
FBgn0004838	9.38749	12.3891	12.0467	4.30203	3.53126	3.11846	3.56745	2.48853	3.33568	14214	19962	19068	9157	7489	7619	8224	6520	8897
FBgn0004839	0.0139085	0.0144121	0.0134319	0.00175714	0.00888	0.00194424	0.00722435	0.00178368	0.00489729	22	26	23	4	21	5	17	5	14
FBgn0004841	0	0	0	0	0	0	0	0	0	0	0	0	0	0	0	0	0	0
FBgn0004842	0	0	0	0	0	0	0	0	0.00543486	0	0	0	0	0	0	0	0	6
FBgn0004852	0.0675477	0.108253	0.131444	0.0265451	0.0588815	0.0405244	0.0174918	0.0396772	0.0435017	122	223	257	69	159	119	46.9999	127	142
FBgn0004854	0	0.00426951	0.000899633	0	0.0013028	0.00239604	0.000654643	0	0.000538868	0	5	1	0	2	4	1	0	1
FBgn0004855	1.37648	2.26354	1.97324	0.507987	0.760227	0.656928	0.679548	0.512437	0.55998	266	494	433	149	215	204	191	187	197
FBgn0004856	0.755104	0.933108	0.849227	0.236051	0.316606	0.258462	0.334415	0.269825	0.242311	519	767	651	223	330	299	346	343	303
FBgn0004858	0.67408	0.893264	1.2437	0.427513	0.503513	0.420723	0.479866	0.576926	0.497633	745	1126	1488	680	832	756	789	1130	994
FBgn0004859	0.0477832	0.070522	0.102789	0.0222711	0.0307417	0.0271533	0.0191059	0.024911	0.0184738	80	133	184	53	76	73	47	73	56
FBgn0004860	0.025256	0.0327905	0.0337456	0.0128804	0.0177581	0.0137417	0.0158883	0.0136553	0.0099724	52	77	75.2146	38	54.6635	46	48.6658	49.8253	37.108
FBgn0004861	0.0281058	0.0297931	0.0303083	0.00642257	0.0090043	0.00607013	0.007975	0.00615446	0.00927935	57	69	66.7853	19	27.3365	20	24.3342	22.1747	33.892
FBgn0004862	0	0	0	0	0	0	0	0	0	0	0	0	0	0	0	0	0	0
FBgn0004863	0.0068249	0	0	0.0142268	0.0125535	0.00419777	0.00229382	0	0	4	0	0	12	11	4	2	0	0
FBgn0004864	0.269563	0.385921	0.393143	0.0958777	0.0981335	0.103849	0.105666	0.106771	0.0844019	463	756	731	237	252	290	270	325	262
FBgn0004865	0.0451358	0.0478259	0.064769	0.0183849	0.00884869	0.0110089	0.00889274	0.00966065	0.00976693	58	70	90	34	17	23	17	22	23
FBgn0004867	90.2342	150.209	162.264	25.9739	37.5118	34.1528	21.5833	24.0701	23.3407	22885	43447	44548	9480	14223	14082	8144	10818	10698
FBgn0004868	4.85384	6.45153	7.09536	2.14588	2.34502	2.66906	1.74964	2.01871	1.80294	2950.01	5116.99	5363.99	1798	2519	3123.99	1516	2261	2313
FBgn0004870	0.0143537	0.0164571	0.020909	0.013426	0.00960058	0.00713058	0.0085351	0.0124606	0.00733105	26	34	40.9999	35	26	21	23	40	24
FBgn0004872	0.00227503	0.0019932	0.00411534	0	0	0	0.000766668	0	0	2.31268	2.31091	4.52876	0	0	0	1.15942	0	0
FBgn0004875	0.18596	0.229257	0.276709	0.106277	0.0797122	0.0837405	0.0925578	0.0662719	0.0797267	477	667	754	399	305	348	367	299	369
FBgn0004876	0.600149	0.688426	0.74154	0.229297	0.23283	0.240511	0.178709	0.193798	0.181161	1184	1570	1595	655	699	786	521	677	644
FBgn0004878	0.00427394	0.00374736	0	0.000742435	0.00071467	0	0.00215468	0.00060292	0	4	4	0	1	1	0	3	1	0
FBgn0004880	0.000821387	0.00504129	0.000294236	0	0	0.00101043	0	0.000463488	0	1	7	1	0	0	5	0	1	0
FBgn0004882	0.00307529	0.00421338	0.00295936	0.000682112	0.000869433	0.000199877	0.00215346	0	0.000899043	4	4	8	2	4	1	2	0	5
FBgn0004885	0.0016802	0.00392849	0.0025868	0	0	0.000344478	0	0	0.000309892	3	8	5	0	0	1	0	0	1
FBgn0004888	3.21375	3.67765	4.12965	1.59461	1.6901	1.51069	1.27091	1.194	1.20625	1455	1899	2024	1039	1144	1112	856	958	987
FBgn0004889	0.206599	0.291153	0.435077	0.0826981	0.161088	0.119084	0.117354	0.132655	0.11496	240	387	525	141	280	215	196	270	236
FBgn0004892	0.0656401	0.0688577	0.0628005	0.0439809	0.0423362	0.0338846	0.0315163	0.0568814	0.0330767	56	67	58	54	54	47	40	86	51
FBgn0004893	0.260339	0.331183	0.436744	0.0979432	0.142456	0.117415	0.0706258	0.102224	0.0815727	298	432	540	162	243	218	120	207	168
FBgn0004895	0.00241024	0.00633984	0.00667937	0	0.00161212	0.00296492	0.00324029	0	0	1	3	3	0	1	2	2	0	0
FBgn0004896	0	0	0	0	0	0	0	0	0	0	0	0	0	0	0	0	0	0
FBgn0004897	0	0.00164929	0	0	0	0	0	0	0	0	1	0	0	0	0	0	0	0
FBgn0004898	0.00954065	0.0390374	0.052879	0.0110488	0.00638138	0	0	0.0125616	0.00175966	3	14	18	5	3	0	0	7	1
FBgn0004901	0.0542663	0.124359	0.101209	0.016527	0.0303236	0.0149348	0.0129094	0.00851734	0.0275472	36.5332	95.4897	73.7595	16.013	30.5218	16.3471	12.9294	10.1619	33.5174
FBgn0004903	0.154902	0.302932	0.356941	0.0880023	0.10035	0.0952755	0.055009	0.0681669	0.099725	159	354	395	130	154	159	84	124	185
FBgn0004907	44.4488	54.0013	63.5794	19.379	20.0071	16.4833	20.5248	17.704	14.6173	20096	28593	31512	12135	13182	12616	12764	14229	12577
FBgn0004908	0.449551	0.689422	0.705509	0.205102	0.237045	0.19204	0.178983	0.141684	0.203782	72.6668	127.1	123.454	47.713	57.2865	50.4693	43.0404	40.587	59.5322
FBgn0004910	0.0132171	0.019046	0.0354223	0.0196553	0.024562	0.0155007	0.0172906	0.00814028	0.0152952	12	16	23	13	30	19	13	9	21
FBgn0004911	0	0	0	0	0	0	0	0	0	0	0	0	0	0	0	0	0	0
FBgn0004913	0.156911	0.144992	0.187475	0.0528824	0.0521617	0.0531676	0.0587371	0.0593807	0.0488692	167	176	216	81	83	92	93	112	94
FBgn0004914	0.310344	0.410988	0.427368	0.136449	0.159024	0.140799	0.130845	0.119711	0.114688	375	558.999	574	242	294	284	241	263	264
FBgn0004915	0.17884	0.389006	0.286257	0.102123	0.0686419	0.0767356	0.0720647	0.0499604	0.0968221	88.8756	220	154	68.795	51	62	51.8377	44	82.8718
FBgn0004919	0.00188859	0.00817175	0.00337566	0.000846395	0	0.000580804	0.00126949	0.00206203	0.00208996	2	9	3	1	0	1	2	3	4
FBgn0004921	3.15658	4.65574	4.53903	1.12212	1.34623	1.28115	1.24762	1.22399	1.29227	1028	1609	1621.01	518	651	675	614	688	764
FBgn0004924	0.909204	1.17827	1.29319	0.26562	0.262649	0.281193	0.209294	0.245822	0.200554	1484	2232	2417	627	689	789	522	727	625
FBgn0004926	18.7919	27.0909	28.6264	5.19767	6.47297	5.61166	5.01387	4.53348	4.67953	6174.88	10152.8	10182.9	2457.97	3179.98	2997.96	2450.96	2639.97	2779
FBgn0004956	0.00115727	0	0	0	0	0	0	0	0	1	0	0	0	0	0	0	0	0
FBgn0004957	0.0748331	0.119497	0.12602	0.032072	0.0404295	0.0443988	0.0209545	0.045982	0.0390981	55.9956	102.775	102.635	34.7054	45.5816	54.2391	23.4355	61.4506	53.2859
FBgn0004959	0	0	0	0	0	0	0	0	0	0	0	0	0	0	0	0	0	0
FBgn0005198	0.0136605	0.0235103	0.0210317	0.00562479	0.00710645	0.00529018	0.00272068	0.00371135	0.00447908	27	53	45	16	21	17	8	13	16
FBgn0005278	4.42629	8.35657	8.72352	1.14338	3.14676	3.23178	0.882664	1.6302	2.08579	2969	6172	5940	1033	2947	3338.99	788	1761	2452
FBgn0005322	1.11578	1.49293	1.9755	0.407837	0.505308	0.580834	0.488291	0.532868	0.567534	415	624	771	207	286	349	268	346	375
FBgn0005355	0.196306	0.262615	0.284158	0.101247	0.101522	0.103315	0.116991	0.0890733	0.111978	97	148	152	72	75	83	86	78	100
FBgn0005386	0.0370495	0.0579342	0.0871496	0.0180468	0.0173719	0.021613	0.0174583	0.0221989	0.0185977	97	173	247	68	67.9999	92	68	103	88
FBgn0005390	0	0	0	0	0	0	0	0	0	0	0	0	0	0	0	0	0	0
FBgn0005391	0.00626414	0.00732312	0.0135018	0	0.00558646	0.00513716	0	0.00235646	0.0080874	3	4	7	0	4	4	0	2	7
FBgn0005411	0.370378	0.586703	0.476709	0.173286	0.198185	0.232363	0.207471	0.182522	0.176244	152	273	209	101	120	153	125	131	130
FBgn0005427	0.145422	0.2314	0.260993	0.0633014	0.0949482	0.0821795	0.0814118	0.109591	0.0970975	178.478	321.315	344.114	111.497	174	161	149	234	214.39
FBgn0005533	119.946	171.596	196.627	37.7169	59.6233	55.8475	34.3887	39.3371	35.6864	14255	23259	25297	6451	10594	10791	6080	8285	7665
FBgn0005536	0.468505	0.503246	0.718937	0.15241	0.160276	0.175939	0.120235	0.126525	0.179959	398.001	486.001	640	191	222	253	148	218	261
FBgn0005558	0	0.000933663	0	0	0	0	0	0	0	0	1	0	0	0	0	0	0	0
FBgn0005561	0.0041213	0.00722704	0.0109013	0.00190912	0	0.00253488	0.000539588	0.00090592	0.00456075	4	9	12	2	0	3	1	2	8
FBgn0005564	0.0123726	0.0145328	0.018592	0.00411324	0.00316753	0.00291278	0.0063666	0.00267224	0.000655082	12	14	17	5	4	4	8	4	1
FBgn0005585	80.3562	87.4554	85.4201	30.5987	26.3713	28.2014	15.1571	13.5415	17.5025	35960	45339	42432	19551	18256	21468	10124	11081	14377
FBgn0005586	0	0.00627034	0	0	0	0	0	0.00082874	0	0	9	0	0	0	0	0	1	0
FBgn0005590	0	0	0	0	0	0	0	0	0	0	0	0	0	0	0	0	0	0
FBgn0005593	45.6122	70.8221	78.349	14.3808	18.4589	16.5288	12.5727	12.5813	12.7765	15617	27656	29040	6558	9449	9201	6404	7634	7906
FBgn0005596	0.0174951	0.0380422	0.0491298	0.00729386	0.0133046	0.012144	0.00658564	0.013426	0.0104547	25	62	76	15	28.4242	28.2138	14	34	27
FBgn0005612	0.0522879	0.062736	0.0720275	0.0350573	0.0515397	0.038367	0.027748	0.0253637	0.0197953	58	80	88	58	84	68	45	49	40
FBgn0005613	0	0.0014362	0	0	0	0	0	0	0	0	2	0	0	0	0	0	0	0
FBgn0005614	0.00318016	0.00836473	0.00293765	0.0033145	0.00478582	0.002445	0.00587852	0.00672921	0.00395904	4	12	4	6	9	5	11	15	9
FBgn0005616	0.0467042	0.0383957	0.0546105	0.00447618	0.0145485	0.0208018	0.014621	0.00999634	0.0106255	58	55.3823	73.4167	8	28	42	28	22	23.848
FBgn0005617	0.0897906	0.0945901	0.0946883	0.0342216	0.0271056	0.0227193	0.0309794	0.0242124	0.0243312	144	184	168	84	67	63	66	70	75
FBgn0005619	0	0	0.00510251	0	0	0	0	0.00103897	0	0	0	6	0	0	0	0	2	0
FBgn0005624	0.219889	0.318903	0.285308	0.0682267	0.075542	0.0547225	0.0446212	0.0608684	0.0456573	477	789	670	213	245	193	144	234	179
FBgn0005626	0.0135523	0.0594126	0.0818543	0.00144873	0.00418367	0	0.00210225	0	0.00106963	14	68	86	2	6	0	3	0	2
FBgn0005631	0.0192893	0.0137313	0.0301389	0.00967278	0.00174582	0.00588651	0.00233935	0.00883701	0.00529549	43.9999	36	75	32	6	22	8	36	22
FBgn0005632	0.151801	0.18988	0.196953	0.0609942	0.0669977	0.071818	0.0502875	0.0410791	0.045654	514.712	733.393	721.458	297.854	340.337	396.166	254.448	247	279.705
FBgn0005633	0	0.0179412	0.0535558	0.0118485	0	0.00209762	0	0	0	0	6	17	5	0	1	0	0	0
FBgn0005636	0.0117057	0.0222367	0.0162199	0.00121753	0.001172	0.00119994	0.00196706	0.0011009	0.00323843	12	26	18	2	2	2	3	2	6
FBgn0005638	0.00356072	0	0.0131568	0	0	0	0	0	0	3	0	12	0	0	0	0	0	0
FBgn0005640	0.353824	0.392806	0.396945	0.259242	0.258521	0.244838	0.192864	0.284966	0.242574	393	504.999	480.001	412	432	440	318	554	478
FBgn0005642	0.0596698	0.0988229	0.104115	0.0118461	0.0202722	0.0174767	0.0108232	0.0235157	0.0256792	63	119	119	18	32	30	17	44	49
FBgn0005648	3.32876	4.8961	5.31991	0.593521	0.606484	0.989025	0.75903	0.255375	0.960026	1951.68	3288.62	3392.21	501.964	533.305	943.029	663.517	265.889	1019.9
FBgn0005649	0.754842	0.804537	0.76472	0.266446	0.245233	0.232148	0.208562	0.154725	0.209373	845.001	1029.04	925.362	429.051	410.733	419.006	348	296.544	421
FBgn0005654	0.294925	0.523863	0.560139	0.0856811	0.12244	0.124321	0.0666518	0.0710149	0.0745591	232	470	477	97	144	159	78	99	106
FBgn0005655	1.37109	2.65594	2.56582	0.081238	0.118485	0.0675523	0.0381039	0.0599746	0.0352858	387	856	785	33	50	32	16	30	18
FBgn0005658	0.0014168	0.00124223	0	0	0	0	0	0	0	2	2	0	0	0	0	0	0	0
FBgn0005659	0.0282457	0.0294091	0.0587067	0.00613326	0.00354234	0.00434325	0.00652661	0.00348651	0.00293038	32	38	72	10	6	8	11	7	6
FBgn0005660	0.01034	0.0118055	0.00225331	0.000670701	0.000645619	0.0103327	0.0021398	0.0134402	0.012019	6.69212	14.2911	2.82607	1.4551	1.4551	13.5842	1.58084	16.4363	18.314
FBgn0005664	0	0.0044082	0	0	0	0	0	0	0	0	3	0	0	0	0	0	0	0
FBgn0005666	0.667464	0.656211	0.75754	0.302854	0.329083	0.289796	0.204839	0.236609	0.222431	6308	7094.01	7754	4103	4664	4457	2880	3973	3813
FBgn0005670	0	0.00171549	0.00361472	0.00407851	0	0	0	0	0.00108258	0	1	2	3	0	0	0	0	1
FBgn0005671	2.50417	3.08675	3.08249	1.21911	1.68877	1.55015	0.62987	0.842752	0.757039	2180	3062	2899	1526	2196	2192	815	1299	1190
FBgn0005672	0.176245	0.237008	0.325935	0.0749564	0.134539	0.140994	0.146536	0.197695	0.108714	90	131	166	53	101	107	105	165	101
FBgn0005674	0.320839	0.555085	0.626372	0.0905172	0.112103	0.153747	0.077897	0.0680932	0.108634	335	666	709	137	178	261	121	126	207
FBgn0005677	0	0	0	0	0	0	0	0	0	0	0	0	0	0	0	0	0	0
FBgn0005683	0.0209423	0.0196736	0.0138182	0.0130675	0.00500269	0.00385571	0.0170938	0.0168817	0.0082769	14	15	10	12	5	4	17	20	10
FBgn0005694	0.352114	0.42076	0.383939	0.11015	0.0737427	0.0908203	0.0731107	0.076694	0.0574791	394	580	497	164	132	174	104	130	121
FBgn0005695	0.154779	0.279079	0.268658	0.04857	0.0718002	0.0698642	0.0478254	0.0739555	0.0718282	124	255	233	56	86	91	57	105	104
FBgn0005696	0.0106002	0.0146051	0.0223814	0	0	0	0.00101791	0	0	7	11	16	0	0	0	1	0	0
FBgn0005771	0.257213	0.448248	0.486981	0.138843	0.183414	0.129439	0.127172	0.128346	0.125264	242	481	496	188	258	198	178	214	213
FBgn0005775	0.00556069	0.00838492	0.0124748	0.00183302	0.00425067	0.00153418	0.00212591	0.000448251	0.00184341	7	17	17	4	9	4	5	1	5
FBgn0005777	0.243614	0.318151	0.373119	0.0686753	0.0947688	0.0733425	0.0586073	0.0549863	0.0808772	194	285	318	77	110	93	69	77	114
FBgn0005778	0	0	0	0	0	0	0	0	0	0	0	0	0	0	0	0	0	0
FBgn0005779	0	0	0	0	0	0	0	0	0	0	0	0	0	0	0	0	0	0
FBgn0008635	2.18535	3.44353	3.74444	0.769705	1.35468	1.42634	0.53584	0.88582	0.826952	2322	4173	4307	1177	2152	2464	847	1668	1588
FBgn0008636	0	0	0	0	0	0	0	0	0	0	0	0	0	0	0	0	0	0
FBgn0008646	0	0	0	0	0.000983368	0.000904278	0	0.000829602	0	0	0	0	0	1	1	0	1	0
FBgn0008651	0.00544044	0	0.0032564	0	0	0.00223082	0	0.0010233	0.00200684	3	0	2	0	0	2	0	1	2
FBgn0010014	0.0238332	0.0313451	0.0357758	0.0144904	0.0159411	0.0256533	0.0220282	0.00168106	0.00824202	8	12	13	7	8	14	11	1	5
FBgn0010015	0.098243	0.121997	0.171482	0.0497231	0.0314728	0.0332498	0.0360579	0.0560143	0.0516748	89	141	162	70	43	45.9999	53.0001	94	94
FBgn0010019	0	0.00238353	0.00627797	0.00283339	0.000909143	0	0.00456834	0.209386	0.00150417	0	2	5	3	1	0	5	273	2
FBgn0010038	0.00528451	0.0278005	0	0.00367193	0.00706922	0.00975099	0.00355221	0.0178915	0.00877197	1	6	0	1	2	3	1	6	3
FBgn0010039	0.0826973	0.249247	0.18143	0.00359137	0.0933409	0.0794757	0	0.0087495	0.0657764	16	55	38	1	27	25	0	3	23
FBgn0010040	0	0.0188508	0	0	0	0.00330595	0	0.0121318	0.00594804	0	4	0	0	0	1	0	4	2
FBgn0010041	0.0529276	0.204962	0.23631	0.0122589	0.029501	0.0298412	0.0474366	0.0323545	0.0341664	12	53	58	4	10	11	16	13	14
FBgn0010042	0	0	0	0	0	0.00598598	0	0	0	0	0	0	0	0	2	0	0	0
FBgn0010043	0	0.0133512	0	0.0070538	0	0	0	0	0	0	3	0	2	0	0	0	0	0
FBgn0010044	0	0	0	0	0	0	0	0	0	0	0	0	0	0	0	0	0	0
FBgn0010051	0.0366517	0.0517608	0.0429027	0.0128309	0.0147838	0.0142831	0.00789887	0.0105776	0.0125394	131	211	166	66	79	83	42	67	81
FBgn0010052	0.0735587	0.0560831	0.0118173	0.0807322	0.0779044	0.0658979	0.0312152	0.0742215	0.0415857	46	40	8	72.9999	74	69	30	85	47
FBgn0010053	0.204298	0.198387	0.26786	0.11448	0.19542	0.149977	0.214112	0.240476	0.228512	93	103	132	75	133	111	145	194	188
FBgn0010078	211.448	319.941	336.756	89.1921	107.65	95.7069	78.2944	79.4174	80.301	25653	44270	44228	15573	19526	18878	14131	17075	17607
FBgn0010097	0.00395691	0	0	0	0	0	0.0013299	0	0	2	0	0	0	0	0	1	0	0
FBgn0010100	0.749117	1.42779	1.62267	0.13361	0.344978	0.391767	0.129253	0.213049	0.246592	748	1626	1754	192	515	636	192	377	445
FBgn0010105	0.443484	0.440801	0.538572	0.237757	0.267222	0.335088	0.281402	0.207101	0.343752	251	281	344	207	249	315	250	219	348
FBgn0010109	0	0	0	0	0	0	0	0	0	0	0	0	0	0	0	0	0	0
FBgn0010113	0.189614	0.388686	0.404671	0.0691368	0.15569	0.132712	0.0712827	0.128587	0.116493	535	912.999	863	342	485	424	323	662.001	463
FBgn0010114	0.000753522	0	0	0.000523583	0.00302401	0.00185387	0	0.000850387	0	1	0	0	1	6	4	0	2	0
FBgn0010173	0.0715566	0.130602	0.144341	0.0223237	0.0644665	0.0494013	0.0412283	0.0675706	0.0444413	49	102	107	22	66	55	42	82	55
FBgn0010194	0.0460555	0.008467	0.01441	0.0190977	0.0139118	0.0141636	0.0284615	0.00335328	0.00822036	62	13	21	37	28	31	57	8	20
FBgn0010197	0	0	0	0	0	0	0	0	0	0	0	0	0	0	0	0	0	0
FBgn0010198	60.0293	79.264	72.7995	25.2898	23.7534	22.6624	17.5142	15.0982	19.4587	11421.1	17622.3	15704.9	6783.58	6852.55	7259.38	5012.54	5200.41	6639.27
FBgn0010213	2.3732	3.37996	3.68298	0.748511	1.10148	1.14236	0.640875	0.74992	0.749054	611	989	1015	286	417	497	253	350	345
FBgn0010215	0.789319	0.985887	1.24008	0.406082	0.411952	0.447614	0.423373	0.391854	0.41105	782	1114	1330	579	615	721	624	688	736
FBgn0010217	4.62912	7.13863	7.29819	1.36683	1.91134	1.63148	0.864064	0.988909	1.19137	2525	4433	4362	1073	1567.99	1455	722	988	1182
FBgn0010220	0.197963	0.331977	0.289393	0.0908122	0.0874161	0.0969354	0.105938	0.101945	0.137185	103	197	163	68	68	82	82	94	129
FBgn0010222	0.434274	0.755918	0.745012	0.118761	0.165983	0.103572	0.143359	0.149658	0.0978087	151	305	284	60	88	59	78	97	63
FBgn0010223	0.0104325	0.00304905	0.00321234	0.00120817	0	0.0021389	0.00233755	0.00490567	0.000962076	6	2	2	1	0	2	2	5	1
FBgn0010225	0.314966	0.557345	0.602272	0.0658946	0.112503	0.0539541	0.0772921	0.105266	0.118063	287	569	607	86	147	76	102	174	198
FBgn0010226	0.592388	0.812168	0.93193	0.253256	0.395982	0.371566	0.251766	0.319293	0.357658	294	461	503	182	294	300	186	283	321
FBgn0010228	7.09262	11.3356	14.2317	1.50903	3.20686	2.91675	1.72166	2.38548	3.00182	1451	3263	4210	455.999	1433	1579	524	887	1593
FBgn0010235	0.39982	0.732966	0.71523	0.101527	0.145686	0.186297	0.0500425	0.0767112	0.159831	232.588	486.386	450.231	84.9639	126.655	176.255	43.4837	79.1067	168.137
FBgn0010238	0.245593	0.452202	0.525797	0.112428	0.183594	0.193708	0.0971093	0.165483	0.211029	170	357	394	112	190	218	100	203	264
FBgn0010240	0.0149325	0.0494611	0.0413815	0	0.00887801	0.0112255	0.0133833	0.00655357	0.0156066	9	34	27	0	8	11	12	7	17
FBgn0010241	0.00209062	0.000611012	0.000643735	0.000968441	0	0	0	0	0	3	1	1	2	0	0	0	0	0
FBgn0010246	0.0183315	0.017534	0.0223222	0.00984267	0.00167199	0.00493702	0.00672124	0.000503257	0.00276629	22	24	29	17	3	9	12	1	6
FBgn0010247	0.488187	0.668863	0.754891	0.170619	0.175924	0.185056	0.169623	0.163202	0.169698	503	786	842	253	271	310	260	298	316
FBgn0010258	0.00429668	0.0113019	0.0119071	0.0044783	0.00431083	0.00792824	0.00433229	0	0.00950963	2	6	6	3	3	6	3	0	8
FBgn0010263	0.0861033	0.0651743	0.062931	0.0545689	0.0348079	0.0360821	0.0788666	0.0560606	0.0549716	110.725	106.512	98.0257	92	70.3793	70	135	112	117.907
FBgn0010265	80.9736	121.79	130.62	28.2275	37.7974	32.1997	21.9841	22.6869	23.894	12225	20868	21367	6052	8528	7954	4957	6120.99	6508
FBgn0010269	0.43579	0.549382	0.618861	0.0858708	0.275532	0.330716	0.0670397	0.214096	0.217135	214	300	348	68	198	281	51	192	192
FBgn0010278	0.322165	0.35658	0.291942	0.132781	0.108152	0.0904122	0.163859	0.100226	0.101668	263	332	258	156	132	120	199	145	150
FBgn0010280	0.176159	0.311812	0.383986	0.0718048	0.120125	0.119231	0.064194	0.0627353	0.0942466	255	511	602	147	255	284	143	156	246
FBgn0010282	2.81746	3.3313	3.00811	1.08673	0.8123	0.757968	0.990103	0.812799	0.733141	1733	2337	2003	962	747	758	906	886	815
FBgn0010287	0.00721228	0.0316183	0.0299805	0	0.00482402	0.0177442	0.00242402	0.00203485	0.00399065	2	10	9	0	2	8	1	1	2
FBgn0010288	1.31891	2.01038	1.9681	0.559266	0.714786	0.665618	0.552397	0.761405	0.626857	390	678	630	241	316	320	244	399	335
FBgn0010292	0.454412	0.580722	0.574203	0.151916	0.123296	0.127882	0.187305	0.164491	0.16011	212	309	290	102	86	97	130	136	135
FBgn0010294	0	0	0.00752632	0	0	0	0	0	0	0	0	1	0	0	0	0	0	0
FBgn0010295	0.0071575	0	0	0	0	0.0088047	0	0	0	1	0	0	0	0	2	0	0	0
FBgn0010296	0	0	0	0	0	0	0	0	0	0	0	0	0	0	0	0	0	0
FBgn0010300	0.430996	0.540979	0.618781	0.150172	0.182893	0.154019	0.14104	0.175362	0.160941	1294	2004	2018	626	876	864	642	1026	916
FBgn0010303	0.350887	0.462065	0.461417	0.109157	0.168303	0.127306	0.0902505	0.128048	0.101968	441.001	686	680	227	345	262	181	282	261
FBgn0010309	0.0615023	0.0796426	0.0987666	0.00723203	0.0253148	0.0267706	0.0133564	0.0256277	0.0219886	65	96	113	11	40	46	21	48	42
FBgn0010313	0.901063	0.862838	0.924739	0.369264	0.2205	0.262228	0.2703	0.264208	0.247007	1259	1354	1381	692	511	620	590.001	694.001	596
FBgn0010314	0	0	0.00550978	0	0	0	0	0	0	0	0	2	0	0	0	0	0	0
FBgn0010315	0.0653775	0.124835	0.104109	0.012114	0.0369263	0.0236704	0.0283209	0.0180355	0.0225084	46	98	82	13	38	28	29	22	28
FBgn0010316	0.0448764	0.0404107	0.104196	0.0168553	0.0316386	0.023872	0.017121	0.0239538	0.0241596	37	38	93	20	39	32	21	35	36
FBgn0010317	0	0.0197588	0.00413319	0.00154439	0.00152978	0.00136707	0	0	0.00122982	0	10.139	2.01309	1	1.02902	1	0	0	1
FBgn0010323	0	0	0	0	0	0	0	0	0	0	0	0	0	0	0	0	0	0
FBgn0010328	0.183178	0.238768	0.24284	0.0695712	0.0587166	0.0566308	0.0701725	0.0693615	0.0598734	386.001	574	554.001	211	185	194	220	259	228
FBgn0010329	0.00791402	0.00555114	0.00877269	0.00439923	0.00370537	0.000973531	0.0021279	0.00223284	0.00481682	10	8	12	8	7	2	4	5	11
FBgn0010333	4.30067	6.01043	5.93065	1.46419	2.00523	2.06238	1.16558	1.28441	1.56726	2443	3894	3647	1197	1703	1904.73	985	1293	1609
FBgn0010339	2.56368	4.08061	3.75792	0.830238	0.819726	0.64836	0.655261	0.558725	0.600252	1002	1819	1590	467	479	412	381	387	424
FBgn0010340	0.48736	0.757847	0.874024	0.158964	0.186582	0.255919	0.186731	0.149811	0.203585	172.554	306.028	335	81	98.7661	147.318	98.3557	94	130.272
FBgn0010341	0.878205	0.980241	1.12734	0.305235	0.38635	0.40774	0.304698	0.255191	0.281941	560.99	714.16	779.582	280.611	368.981	423.467	289.558	288.891	325.496
FBgn0010342	0.0437649	0.0583265	0.0210224	0.00973118	0.0281018	0.00861388	0.0129441	0.00395127	0.0125922	25	38	13	8	24	8	11	4	13
FBgn0010348	2.20098	4.39286	4.87438	0.71963	1.94828	3.11446	0.416177	0.6032	0.939113	999	2262	2389	473	1306	2279	282	487	765
FBgn0010350	0.0378171	0.133004	0.113494	0.0078576	0.0675545	0.0390504	0.0112994	0.0338276	0.0272324	29.3204	119.611	95.2579	8.76763	78.3068	49.2249	13.033	46.4796	38.159
FBgn0010352	0.484934	0.599064	0.714262	0.205306	0.238235	0.216586	0.170315	0.166726	0.168413	639.91	893.296	1045.76	385	462.118	459	330	390.799	410
FBgn0010355	0.0160207	0.0214604	0.00863282	0.00494754	0.00238126	0.0104013	0.00119656	0.00100445	0.00418601	36	55	21	16	8	38	4	4	17
FBgn0010356	0.149007	0.252128	0.303061	0.0399617	0.0891742	0.0651193	0.0421732	0.0848185	0.0527954	114	220	251	44	102	81	48	115	73
FBgn0010357	0	0	0	0.00225285	2.82e-05	0.00199418	0	0	0	0	0	0	1	0.00914659	1	0	0	0
FBgn0010358	0	0	0	0	0	0	0	0	0	0	0	0	0	0	0	0	0	0
FBgn0010359	0	0	0	0	0	0.00252351	0	0	0	0	0	0	0	0	0.886677	0	0	0
FBgn0010379	0.47612	0.911798	1.00357	0.162283	0.309074	0.290388	0.146526	0.209473	0.25568	632.999	1322	1463	320	616	645	317	528.001	637
FBgn0010380	0.448957	0.527856	0.546641	0.178353	0.220379	0.24686	0.158735	0.139571	0.151837	481	645	634	275	353	430	253	265	294
FBgn0010382	0.0477083	0.0394671	0.0387571	0.0132992	0.0309041	0.0153948	0.00616567	0.0171389	0.0184446	60.0001	57.9999	52	23	57.0001	33	12	39	42
FBgn0010383	0.000992005	0	0.00130582	0.000689292	0	0	0	0	0.0023465	1	0	1	1	0	0	0	0	3
FBgn0010385	0	0	0	0	0.0189102	0	0.0855193	0	0	0	0	0	0	2	0	9	0	0
FBgn0010387	62.5011	79.5759	84.0053	24.5823	23.9663	22.8106	15.4271	16.9002	17.4251	4230	6092	6099	2382	2405	2480	1527	1999	2119
FBgn0010388	0.126862	0.111232	0.0502237	0	0.169707	0	0.134005	0	0.0300834	7	7	3	0	14	0	11	0	3
FBgn0010389	0.0291908	0.0700077	0.0515506	0.0226694	0.038475	0.0417174	0.0253929	0.0256764	0.0244247	34	93	65	38	67	79	44	53	53
FBgn0010391	4.97693	6.74516	6.69574	1.83119	2.09977	1.86441	1.51666	1.28949	1.27708	3269	5053	4761	1731	2062	1991	1482	1501	1516
FBgn0010395	0.0147043	0.0352731	0.0400156	0.00562889	0.0126429	0.0105309	0.0040427	0.0162634	0.0173959	16.3363	44.6948	45.876	9	21	19.0217	6.68171	32.0207	34.9288
FBgn0010397	0.649425	1.08165	1.01189	0.192099	0.307901	0.303189	0.172687	0.332605	0.326144	498	946	840	212	353	378	197	452	452
FBgn0010398	0.0472609	0.0249671	0.0488507	0	0.0101607	0.0175144	0.00136722	0.00229543	0.00560359	28	16	31	0	9	14	1	2	6
FBgn0010399	0	0.00187273	0	0	0	0.000437907	0.000478577	0	0	0	3	0	0	0	1	1	0	0
FBgn0010401	0.0333595	0.0584986	0.0231118	0	0.0167347	0	0.0448479	0.00941195	0.00461456	4	8	3	0	3	0	8	2	1
FBgn0010403	0	0	0	0	0	0	0	0	0	0	0	0	0	0	0	0	0	0
FBgn0010406	0.278087	0.441931	0.412082	0.154314	0.213127	0.175793	0.196014	0.207044	0.191268	144	261	231	115	165	148	151	190	179
FBgn0010407	0	0	0	0	0	0.000839251	0.000917196	0.00155445	0.000754988	0	0	0	0	0	1	1	2.01892	1
FBgn0010408	77.7298	102.726	94.6274	30.855	27.3976	24.9124	20.7101	15.8056	19.2359	15458	23905	21406	8519	8754	8654	6041.01	5942	7283
FBgn0010409	91.0609	144.565	158.309	30.4179	38.0936	32.214	26.5406	26.3375	26.2672	14043	25427	26429	6751	8783	8077	6089	7198	7321
FBgn0010411	89.256	120.329	125.344	35.8722	40.6125	38.4104	34.2078	30.5064	31.3641	12128	18644	18438	7013	8247	8484	6914	7343	7703
FBgn0010412	83.3258	118.786	126.036	33.1303	43.3542	38.4551	27.4817	26.2452	28.9274	13191	21469	21773	7492	10468	10274	6460	7565	8417
FBgn0010414	0.0701119	0.0755958	0.094523	0.0269919	0.0291511	0.037296	0.0726036	0.0411662	0.0429878	74	91	108	41	46	64	114	77	82
FBgn0010415	2.04163	2.60634	2.42918	0.960131	0.814452	0.778183	0.768744	0.756412	0.706558	1644	2396	2192.97	1019	978	1035	879.999	1053	1004
FBgn0010416	0.278243	0.400995	0.469739	0.0700014	0.166854	0.130958	0.0698688	0.10828	0.104407	188	317	369	72	166	158	70	134	133
FBgn0010417	0.126547	0.14437	0.164546	0.0794542	0.0611862	0.0919003	0.106584	0.0636633	0.0842399	83	108	117	75	60	98	104	74	100
FBgn0010421	0.677427	0.805607	0.796997	0.267672	0.244267	0.249594	0.331069	0.232547	0.202267	220.201	298.665	280.453	125.219	118.709	131.907	160.097	133.961	118.826
FBgn0010422	0.813824	1.32812	1.57958	0.367727	0.326664	0.329388	0.35402	0.362333	0.249458	432.506	737.53	844.891	279.794	271.901	298.147	293.211	324.971	250.999
FBgn0010423	4.63466	4.80976	4.1903	2.39452	3.62209	2.82035	1.63097	2.23822	1.98461	750	890	802	554	900	805	394	652	608
FBgn0010424	3.54606	3.59323	3.14902	1.19723	1.35568	1.29223	0.839377	0.769436	0.965664	957	1106	920	465	547	567	338	368	471
FBgn0010425	0	0	0	0	0	0	0	0	0	0	0	0	0	0	0	0	0	0
FBgn0010431	0	0	0	0	0	0	0	0	0	0	0	0	0	0	0	0	0	0
FBgn0010433	0	0	0	0	0	0	0	0	0	0	0	0	0	0	0	0	0	0
FBgn0010434	0.494465	0.786378	0.841981	0.148144	0.289991	0.303895	0.147243	0.213602	0.248743	479.001	863	880	204	415	482	214	375	435
FBgn0010435	0.0596095	0.0974837	0.105919	0.0186818	0.0273739	0.0367379	0.0187513	0.0462605	0.0296965	51	95	98	23	35	51	24	70	46
FBgn0010438	0.662697	1.39576	1.36103	0.119061	0.125733	0.0724843	0.311716	0.212224	0.110222	88.1341	211.711	195.949	22.7882	25	15.6729	61.6729	50.0188	26.4926
FBgn0010441	0.0832494	0.127379	0.144756	0.010208	0.0425806	0.044176	0.0384036	0.0322381	0.0198703	51	89	96	9	39	44	35	35	22
FBgn0010452	0.12234	0.115879	0.12291	0.0328862	0.0155295	0.0214208	0.0282124	0.0161246	0.018776	137	148	149	53	26	39	47	32	38
FBgn0010453	0.0294501	0.0328639	0.0692479	0.00932508	0.0107444	0.0131737	0.000693841	0.0181287	0.011851	33	42	84	15	18	24	1	36	24
FBgn0010470	17.5696	22.3124	22.0842	9.45282	9.50875	8.90267	5.22496	5.19336	5.7965	6815	9859	9265	5273	5508	5613	3011	3568	4061
FBgn0010473	0.0220302	0.0321596	0.0161726	0.00122243	0.00474385	0.00336396	0.00238374	0.00229138	0.0010293	43	58	41	4	9	14	8	8	5
FBgn0010482	0.101214	0.0727224	0.111134	0.0308707	0.0319261	0.0331029	0.0161885	0.0162348	0.0205102	172	144	208	80	79.0001	85.9999	44.0001	50.9999	64
FBgn0010488	0.972816	1.22348	1.29293	0.345479	0.354706	0.335657	0.302665	0.314015	0.324762	1863	2666	2681.01	952.999	1012	1046	863	1064	1125
FBgn0010497	0.076171	0.0690123	0.0867808	0.0414597	0.0305688	0.043727	0.0162138	0.0315197	0.0302049	60	62	74	47	36	56	19	44	43
FBgn0010501	0.00912004	0.0159928	0.00181704	0.0101393	0	0.00112189	0.00122608	0.00102924	0.00403699	5	10	1.07841	8	0	1	1	1	4
FBgn0010504	0.0281315	0.0810436	0.0742469	0.00139622	0.00134401	0.0111232	0.00606843	0.00566924	0.0144537	14	48	41	1	1	11	6	5	15
FBgn0010516	2.54253	4.23587	4.076	0.795101	0.963243	0.858306	0.581573	0.719707	0.662488	954	1807	1672	427	531	522	332	482	461
FBgn0010520	0.480475	0.780469	0.700796	0.1722	0.121783	0.0933235	0.186983	0.185503	0.179101	95	176	150	49	36	30	55	65	64
FBgn0010531	0.502202	0.551224	0.525763	0.209372	0.281164	0.21279	0.237554	0.203614	0.168784	135	169	153	81	113	93	95	97	82
FBgn0010548	1.06247	1.56616	1.3988	0.334899	0.276845	0.312462	0.271088	0.209081	0.252221	666	1116	993.001	300	259	314	249	239	278.999
FBgn0010549	0	0	0	0	0	0	0	0	0	0	0	0	0	0	0	0	0	0
FBgn0010551	1.08562	1.97816	2.13685	0.475609	0.390601	0.346992	0.453297	0.336578	0.390556	449	912.579	926.896	270.791	233.67	227.555	275	236	276
FBgn0010583	0.048457	0.0703227	0.0540231	0.0179961	0.0212349	0.0159299	0.0140398	0.0103715	0.015255	58	96	70	31	38	31	25	22	33
FBgn0010590	5.4163	7.94531	8.16686	2.10888	2.4702	2.70559	1.29509	1.54158	1.12594	1251	2093	2042	701	853	1016	445	631	470
FBgn0010591	0.590366	0.909604	1.00436	0.143954	0.453219	0.379402	0.134025	0.305002	0.265463	379	666	698	133	438	396	128	347	308
FBgn0010602	3.76428	6.08918	6.93415	1.41922	2.13307	1.99535	1.3084	1.5953	1.51251	1259	2333	2518	680	1072	1107	663	957	935
FBgn0010607	0.398495	0.286711	0.433129	0.111603	0.0549443	0.122819	0.115419	0.0842475	0.113899	125.445	102.889	147.603	50.5614	25.8593	62.6855	54.0525	47	64.8005
FBgn0010611	2.82545	2.12497	1.8187	3.35211	4.5672	2.98675	3.05088	4.07783	2.39917	1609.38	1377.03	1126.12	2743	3877	2755	2577.39	4100	2460
FBgn0010612	28.4902	39.8484	41.2901	14.2609	17.1238	18.0739	10.8625	11.8043	11.4407	2820	4502	4447	2029	2533	2910	1595	2075	2051
FBgn0010620	3.86647	5.73669	6.31919	1.59695	2.40052	2.07572	1.52485	2.10293	2.21563	2076	3513	3673	1234	1927	1812	1218	2001	2150
FBgn0010621	1.25914	2.005	1.67735	0.317096	0.289429	0.270723	0.303316	0.210631	0.271152	693.505	1258.73	998.713	251	238	245.087	248.184	205.307	269.534
FBgn0010622	0.307802	0.365595	0.510341	0.126879	0.133756	0.197865	0.101741	0.161146	0.1445	103.972	139.719	187.961	61.9488	67.9533	109.906	51.895	95.9605	87.9627
FBgn0010638	56.9686	89.8791	91.35	17.7367	22.5232	23.65	11.534	11.361	11.3434	11949	21501	20742	5354	7063	8065	3599	4223	4300
FBgn0010651	1.66012	2.24188	2.40465	0.280443	0.182906	0.205156	0.192673	0.131951	0.227577	1266	1940	1985	310	210	256	222	183	312
FBgn0010660	0.0385404	0.0946173	0.11952	0.0122421	0.0272513	0.0277687	0.00629159	0.0214367	0.0173646	70	196	235	32	74	82	17	69	57
FBgn0010741	4.06754	6.54103	7.14409	1.34979	1.72022	1.39395	1.42532	1.40492	1.26156	1031	1847	1902	480	639	565	548	641	558
FBgn0010747	1.75922	3.55042	2.95678	0.163346	0.761197	0.778496	0.123486	0.36457	0.610745	1130	2601	2056	151	731	813	118	415	709
FBgn0010750	0.151265	0.208415	0.22124	0.0262765	0.0517922	0.0819622	0.0145256	0.0579195	0.0518124	84	132	133	21	43	74	12	57	52
FBgn0010762	0.202368	0.310116	0.329494	0.0652866	0.0705801	0.0480582	0.0561377	0.0544314	0.0590617	310	526	572	126	164	130	130	149	164
FBgn0010768	0.000924228	0.000810355	0.00170751	0	0	0.000568463	0	0	0.00102278	1	1	2	0	0	1	0	0	2
FBgn0010770	0.134945	0.225	0.194136	0.0384288	0.0192357	0.0326559	0.0802999	0.0449387	0.050186	61	116	95	25	13	24	54	36	41
FBgn0010772	0.546021	0.655437	0.786187	0.32578	0.303406	0.274777	0.284989	0.230619	0.239421	593	811	926	511	495	487	463	446	472.999
FBgn0010774	0.660561	1.08142	1.31378	0.225159	0.361932	0.246621	0.166108	0.221153	0.24948	263.784	492.53	567.944	129.4	216.085	160.119	98.6808	156.508	180.053
FBgn0010786	0.14274	0.275548	0.291413	0.039173	0.0505448	0.0331997	0.0378957	0.0392571	0.0238931	119	262	263	47	63	45	47	58	36
FBgn0010803	0.883981	1.40982	1.47828	0.263431	0.265048	0.30232	0.243317	0.196728	0.192907	464	844	840	199	208	258	190	183	183
FBgn0010808	0.744004	0.980176	1.19832	0.35525	0.479772	0.408331	0.500113	0.404752	0.369445	195	293	340	134	188	174	195	188	175
FBgn0010812	0.13033	0.0963146	0.118671	0.0297551	0.0348689	0.0417983	0.02065	0.0351949	0.0314206	141	118	153	46	56	76	33	73	65
FBgn0010825	0.184461	0.241799	0.237008	0.0804613	0.0806156	0.0727486	0.059174	0.0717268	0.0612222	534.999	801	741	336	350	341	255	367	319
FBgn0010830	0.149456	0.202023	0.260013	0.0649058	0.0583133	0.0635819	0.0636267	0.0611424	0.0475503	120	185	226	75	70	83	76	87	69
FBgn0010877	0.24249	0.348014	0.306368	0.0829703	0.0722729	0.113658	0.0574721	0.0757126	0.0880389	264	416	340	130	117	195	87	140	163
FBgn0010894	0.113634	0.219193	0.200141	0.0442166	0.0537106	0.0615055	0.0458303	0.0786548	0.0611985	75	165	143	42	53	66	45	92	73
FBgn0010905	0.145375	0.207128	0.206319	0.0468335	0.0627613	0.0499914	0.0370891	0.0594728	0.0449721	446	734	710	204	292	258	167	323	250
FBgn0010909	0.33569	0.434826	0.47486	0.152529	0.1656	0.161422	0.128205	0.111827	0.156318	629	910	938.001	400	467	475	352	373	514
FBgn0010926	0.209153	0.33666	0.350372	0.0520584	0.0779823	0.0672018	0.0992848	0.0885	0.0716585	207	380	364.508	73	112.044	110	145.024	150.724	124.459
FBgn0011016	10.2698	25.6206	27.3196	1.41254	5.8619	5.6081	0.991969	2.49389	2.86205	2728	7762	7856	540	2328	2422	392	1174	1374
FBgn0011020	0.0108614	0.0266648	0.0230763	0.0128299	0.0123501	0.0207095	0.00730092	0.0110318	0.0108175	10	28	23	17	17	31	10	18	18
FBgn0011202	0.157102	0.185006	0.196802	0.082081	0.134228	0.0861646	0.06714	0.0886664	0.101095	234	311	333	165	280	199	141	236	261
FBgn0011204	1.23541	1.59765	1.68622	0.375985	0.430239	0.442417	0.329398	0.256895	0.298799	1137	1677	1680	498	592	662	451	419	497
FBgn0011205	0.131196	0.199473	0.231924	0.0460087	0.0320805	0.0530633	0.0375562	0.0287796	0.0193511	88.8909	154.409	168.195	44.358	32.1311	57.7954	37.4291	34.8658	23.4291
FBgn0011206	0.817296	1.23823	1.15531	0.279772	0.399926	0.251867	0.30571	0.356898	0.289596	619.803	1007.92	910.503	330.55	474.016	336.123	387.513	530.11	437.695
FBgn0011207	0.128649	0.20814	0.174015	0.0297971	0.0573656	0.0565198	0.0164718	0.0337041	0.0440658	84	155	123	28	56	60	16	39	52
FBgn0011211	8.17317	9.99399	12.1804	2.94816	4.02152	3.40586	1.82175	2.47419	2.31793	5935	8277	9575	3081	4366	4021	1968	3184	3042
FBgn0011217	3.93567	4.96747	5.90437	1.22038	1.45302	1.41833	0.896994	0.995915	1.15363	2386	3435	3875	1018	1317	1398	809	1070	1264
FBgn0011224	0.27063	0.359705	0.420434	0.135065	0.14665	0.119819	0.133508	0.13481	0.136494	433	691	761	302	355	338	346	434	424
FBgn0011225	0.238115	0.31452	0.361098	0.135248	0.165929	0.185284	0.0806008	0.147748	0.133037	316.999	479	533	257	333	411	162	345	326
FBgn0011227	45.471	53.7079	57.6929	28.6184	31.4159	27.7827	18.1685	18.3946	17.504	2123	2859.94	2915.97	1922.96	2192.95	2108.96	1261.94	1522	1477
FBgn0011230	0.0584259	0.0682515	0.0750048	0.0283321	0.0303422	0.0325703	0.0308492	0.0391436	0.0306675	331	441	460	231	257	300	260	393	314
FBgn0011232	0.363607	0.445002	0.481275	0.154398	0.155943	0.157896	0.142009	0.12206	0.124346	432	603	619	264	277	305	251	257	267
FBgn0011236	0.289516	0.369543	0.342032	0.0588455	0.0586209	0.0635971	0.0450119	0.0344515	0.0506733	294	428	376	86	89	105	68	62	93
FBgn0011239	0	0.0160272	0	0	0	0	0.00614363	0	0	0	6	0	0	0	0	3	0	0
FBgn0011244	0	0	0	0.00196056	0	0	0	0	0	0	0	0	2	0	0	0	0	0
FBgn0011259	0.0686301	0.076402	0.0968501	0.0295988	0.039808	0.0436205	0.0238588	0.0345597	0.0316831	217	281	330	136	192	227	112	199	186
FBgn0011260	0.0104254	0.0106701	0.0100805	0.000606134	0.00564651	0.00582821	0.00289097	0.000476359	0.00671585	12	14	13	1	10	11	5	1	14
FBgn0011270	0	0	0	0	0	0	0	0.00360119	0	0	0	0	0	0	0	0	2	0
FBgn0011272	63.9026	97.534	100.235	20.6092	24.7773	22.9801	17.4647	16.4138	18.2317	14396	24903	24462	6556	8433	8594	5826	6734	7486
FBgn0011273	0	0	0	0	0	0	0	0	0	0	0	0	0	0	0	0	0	0
FBgn0011274	0.174104	0.207294	0.237565	0.104915	0.129465	0.114866	0.0967321	0.11843	0.136921	197.101	266.767	277.846	167	233.425	197.741	173.522	230.492	270.121
FBgn0011276	0	0	0	0	0	0	0	0	0	0	0	0	0	0	0	0	0	0
FBgn0011277	0.00230792	0	0	0	0	0	0	0	0	1	0	0	0	0	0	0	0	0
FBgn0011278	0	0	0	0	0	0	0	0	0	0	0	0	0	0	0	0	0	0
FBgn0011279	0	0	0	0	0	0	0	0	0	0	0	0	0	0	0	0	0	0
FBgn0011280	0	0	0	0	0	0	0	0.0112611	0	0	0	0	0	0	0	0	3	0
FBgn0011281	0	0	0	0	0	0	0	0	0	0	0	0	0	0	0	0	0	0
FBgn0011282	0.105115	0.164504	0.147768	0.155699	0.244166	0.227443	0.0791956	0.0703995	0.104462	18.4736	33.7921	26.2535	36.7751	62.5537	65.689	19.336	20.4757	33.9847
FBgn0011283	0.00751919	0	0	0	0	0	0	0	0	1	0	0	0	0	0	0	0	0
FBgn0011284	74.5373	113.569	126.424	25.0857	31.9137	28.2368	21.6164	21.659	20.6101	21975	38394	40480	10414	14312	13884	9429	11392	11086
FBgn0011286	0.0413904	0.0455313	0.045347	0.0182898	0.0154203	0.012617	0.0125685	0.0148535	0.0136604	230	291	275	145	127	113	103	145	136
FBgn0011288	0.0208496	0.0207182	0.0385196	0.00772658	0.00371882	0.00427464	0.00934332	0.0078433	0.0099982	15	17	30	8	4	5	10	10	13
FBgn0011289	1.6494	2.29311	2.39909	0.508138	0.518087	0.641764	0.509946	0.407509	0.526907	730	1153	1151	321	340	458	333	317	418
FBgn0011290	1.8877	2.50925	2.69162	0.616721	0.851392	0.782917	0.791603	0.674288	0.656398	436	661	679	206	294	294	272	276	274
FBgn0011291	0.450006	0.677617	0.786201	0.105361	0.173398	0.234665	0.0591829	0.115923	0.13803	92	158	174	31	53	78	18	42	51
FBgn0011293	0	0	0	0	0	0	0	0	0.00850182	0	0	0	0	0	0	0	0	2
FBgn0011294	0	0	0	0	0	0	0	0.00552972	0.00271115	0	0	0	0	0	0	0	2	1
FBgn0011296	3.77242	3.90262	3.9447	3.07527	3.09748	3.18021	2.76428	3.09898	2.35014	719.203	848.582	814.128	843.773	882.885	985.746	784.011	1047.03	809.756
FBgn0011297	0.330624	0.485893	0.485885	0.139667	0.136957	0.112077	0.107333	0.0689011	0.0925088	176	295	280	107	109	97	85	65	89
FBgn0011300	0.158752	0.182143	0.25205	0.0517068	0.0696823	0.0626881	0.0604418	0.0512372	0.0569582	256	335	440	120	168	165	145	147	166
FBgn0011305	1.18229	1.36251	1.70213	0.604456	0.740538	0.58856	0.611327	0.613587	0.601667	412	569	636	300	391	320	336	372	404
FBgn0011327	1.06701	1.34419	1.61288	0.299193	0.299081	0.282303	0.249008	0.22161	0.233014	451	648	738	182	189	194	143	166	178
FBgn0011335	0.0365773	0.0509358	0.10534	0.0284058	0.0172696	0.0211742	0.0231407	0	0.0238103	17	27	53	19	12	16	16	0	20
FBgn0011336	15.1398	20.526	22.5848	6.51715	8.31549	7.71684	4.20083	4.69551	4.40875	13409	20734	21654	8307	11011	11112	5535	7370	7057
FBgn0011361	5.74669	8.01014	7.91986	2.33669	2.5376	2.07941	1.88124	1.43054	1.66534	999	1591	1484	559	657	584	457	455	541
FBgn0011455	3.89771	5.53535	6.09044	1.79664	2.57766	2.04957	1.59045	1.43425	1.57648	738.486	1194.26	1243.77	484	739	639.72	457	485	554
FBgn0011474	0.0610671	0.123016	0.134243	0.0179979	0.0401284	0.032533	0.0201499	0.0278416	0.0273051	83.6083	191.349	201.612	35.2717	80.2361	73.0109	40.8189	68.9274	69.5398
FBgn0011476	0	0	0	0	0	0	0	0	0	0	0	0	0	0	0	0	0	0
FBgn0011481	1.12692	1.36753	1.49956	0.501315	0.373314	0.34338	0.413478	0.320475	0.376287	1785	2328	2592	992	995	919	847	920	1042
FBgn0011509	3.74847	6.91225	7.29918	0.833226	1.74353	1.61817	0.605051	0.760166	0.987737	1241	2610	2616	397	863	871	298	446	591
FBgn0011554	0	0	0	0	0	0	0	0	0	0	0	0	0	0	0	0	0	0
FBgn0011555	0	0	0	0	0	0	0	0	0	0	0	0	0	0	0	0	0	0
FBgn0011556	0	0	0	0	0	0	0.00254068	0	0	0	0	0	0	0	0	1	0	0
FBgn0011559	95.313	95.0761	111.655	87.112	90.2255	92.6953	78.2255	84.7568	85.7873	91766	104401	116373	120703	129874	145099	112043	144615	149273
FBgn0011566	0.561435	0.641443	0.737529	0.195986	0.297903	0.281567	0.209001	0.233151	0.182118	310.384	404.448	441.393	155.932	246.228	253.081	171.892	228.427	181.962
FBgn0011569	0	0	0	0	0	0	0	0	0	0	0	0	0	0	0	0	0	0
FBgn0011570	0.696729	0.949248	1.03568	0.300283	0.284618	0.303112	0.239129	0.292851	0.274853	367	570	589	224	223	257	184	271	260
FBgn0011573	1.19936	1.28859	1.33911	0.367297	0.364275	0.357145	0.332441	0.233876	0.275864	599	734	724	264	272	290	247	207	249
FBgn0011576	0.0306639	0.0609413	0.0623167	0.0525566	0.0669992	0.06664	0.0728292	0.122274	0.0859649	15	44	33	37	49	54	53	106	79
FBgn0011581	3.62615	4.22352	5.37062	1.80101	2.08305	1.96212	1.64574	1.72808	1.93721	962	1321	1626	688	848	854	676	827	932
FBgn0011582	0.000787196	0	0.000181793	0.000136745	0	0	0	0	0.000326674	4	0	1	1	0	0	0	0	3
FBgn0011584	27.7546	37.3436	37.74	10.8228	12.1935	12.0262	7.89396	7.80193	9.05676	12920	19797	18987	7279	8507	9131	5534	6505	7618
FBgn0011586	2.76737	4.59598	4.70939	1.3252	1.55375	1.38962	1.69829	1.67539	1.32532	695	1301	1264	476	579	569	623	734	600
FBgn0011589	0.00330218	0.000965107	0.000523899	0.00191209	0.00110435	0.00279066	0.00114369	0.000621112	0.00243618	6	2	1	5	3	8	3	2	8
FBgn0011591	0.0289147	0.0422536	0.0682586	0.00223237	0.0150422	0.00988027	0.00539895	0.0217544	0.00622179	18	30	46	2	14	10	5	24	7
FBgn0011592	0.0184558	0.0196806	0.0253423	0.00519888	0.0120107	0.0113515	0.00704113	0.00956972	0.0046919	39	45.9999	55	15	36	37	22	35	17
FBgn0011596	0.00644894	0.00678525	0.00714863	0	0.0146657	0.00396653	0.000866984	0.00582236	0.00713656	5	6	6	0	17	5	1	8	10
FBgn0011603	0.113332	0.21883	0.205353	0.0164601	0.0346641	0.0301984	0.00733403	0.0284742	0.00981011	84	183	167	20	38	36	8	37	13
FBgn0011604	0.0795207	0.129062	0.12121	0.0311543	0.0458325	0.0231991	0.0290012	0.0381885	0.0231384	94	174	156	53	81	46	51	80	51
FBgn0011606	0.011105	0.00572753	0.00724113	0.00656342	0.00437564	0.0028125	0.00570832	0.00258024	0.00241224	17	10	12	13	10	7	13	7	6
FBgn0011638	0.5445	0.969516	0.795098	0.0640276	0.120465	0.137826	0.102764	0.126444	0.12167	260	528	411	44	86	107	73	107	105
FBgn0011640	1.17877	1.56778	1.72713	0.585942	0.436668	0.428318	0.614379	0.304944	0.473615	652	986	1031	465	360	384	504	298	472
FBgn0011642	0.382537	0.535088	0.522655	0.105086	0.258245	0.219965	0.118403	0.209833	0.22643	216	345	321	85	217	205	100	212	230
FBgn0011648	0.0663538	0.107354	0.121927	0.0256544	0.0655354	0.0424703	0.0294275	0.0460108	0.0273867	69	131	143	40	105	72	47	87	52
FBgn0011653	0	0	0	0.000568466	0	0	0	0	0	0	0	0	1	0	0	0	0	0
FBgn0011655	0.209369	0.292961	0.323145	0.0731497	0.109593	0.0980016	0.0821386	0.0778985	0.0863085	238.901	381.259	398	120.124	186.962	181.809	139.431	157.523	177.987
FBgn0011656	0.179004	0.276878	0.301327	0.0490966	0.0986208	0.0783578	0.0642241	0.0660543	0.0732573	319.999	485	557	110	243	206	163	223	228
FBgn0011659	0.0483976	0.0716055	0.0726499	0.0105089	0.029336	0.0186046	0.00914957	0.0213353	0.0376574	32	54	52	10	29	20	9	25	45
FBgn0011660	0.0139321	0.00941381	0.0284972	0.00345738	0.00464097	0.00550875	0.00535144	0.00861612	0.00825942	14	10.789	31	5	6.97244	9	8	15.3438	15
FBgn0011661	5.67438	7.74639	7.32757	2.03624	1.74668	1.63099	1.7375	1.38675	1.44966	4570.99	7032	6608.01	2239	2178	2241	2103	2118	2206
FBgn0011666	0.0643415	0.0984646	0.0875788	0.00939862	0.0367918	0.0295374	0.0102252	0.0158477	0.0218955	90.0001	162	138	25	65	59	25	46	58
FBgn0011668	8603.89	9684.3	10723.9	6839.22	7999.68	7953.22	7894.42	8204.3	7972.21	383448	492248	517382	438661	533025	576278	523406	647982	642125
FBgn0011669	206126	201777	202177	202348	197984	193673	215822	207866	208838	1090000	1220000	1160000	1540000	1560000	1660000	1700000	1950000	1990000
FBgn0011670	901.723	1029.97	1067.4	434.743	581.049	544.721	341.43	419.08	504.109	57091	74374	73159	39613	55001	56072	32159	47022	57683
FBgn0011672	0.388119	0.60248	0.644813	0.0641011	0.12184	0.147618	0.0694547	0.0806851	0.0728169	317	549	599	84.0001	152	204	90	120	109
FBgn0011674	0.015332	0.0194922	0.0318665	0.00319601	0.00717848	0.00754415	0.0170049	0.01514	0.0144217	20	29	45	6	14	16	33	35	34
FBgn0011676	0.000743808	0.000652164	0.00343546	0.0022642	0.00126152	0	0	0.000709506	0.00185387	1	1	5	5	3	0	0	2	5
FBgn0011692	0.000939898	0	0.00347292	0	0	0	0.000631792	0	0	1	0	4	0	0	0	1	0	0
FBgn0011693	0.0360742	0.0208309	0.0262783	0.022011	0.0397272	0.00487094	0.00532333	0.037984	0	9.11038	6	7.18428	8	15	2	2	17	0
FBgn0011694	0.0471202	3.25008	0	0.207362	0.441237	0.579642	0.0844636	0.664719	0.243341	3	239	0	19	42	60	8	75	28
FBgn0011695	3.67465	4.58628	4.67665	2.91373	3.48446	3.40598	2.1656	2.31672	2.13429	503	717	693	574	724	759	442	564	528
FBgn0011701	0.00909722	0.00620384	0.0168601	0	0.00135218	0.00435656	0.00407672	0.00147411	0	9	7	18.0568	0	2	7.00737	6	2.58448	0
FBgn0011703	0.0808455	0.175127	0.255892	0.000826107	0.0127234	0.00146251	0.00319669	0.00335434	0.00328918	68	168	233	1	16	2	4	5	5
FBgn0011704	0.513117	0.869563	0.809344	0.104284	0.0881751	0.112269	0.214037	0.154497	0.161596	253	489	432	74	65	90	157	135	144
FBgn0011705	0.712199	1.18793	1.70786	0.223274	0.235776	0.250736	0.151519	0.262505	0.193868	308	587	794	140	151	176	96	197	159
FBgn0011706	0.0523558	0.0141247	0.0520839	0.00559681	0.00808127	0.00990842	0.0081215	0.00909017	0.011142	13	4	14	2	3	4	3	4	5
FBgn0011708	2.88808	3.97185	3.89501	1.19782	1.02636	1.21554	0.920223	0.735676	0.791465	1624	2547	2375	975	866	1114	776	730	802
FBgn0011710	0.210455	0.366336	0.504602	0.1086	0.142835	0.13801	0.0769742	0.10391	0.101892	136	270	353	101	138	145	74	119	119
FBgn0011715	0.440508	0.739735	0.570146	0.231726	0.209743	0.166851	0.219152	0.161499	0.166624	177	339	248	134	126	109	131	115	121
FBgn0011722	0.00258488	0.00380128	0.00698505	0.000291899	0.000561966	0	0	0.000364646	0.000232442	6.23451	10.4567	18	1	2	0	0	1.55863	1
FBgn0011723	0	0.00409901	0	0	0.00312694	0.00359431	0	0	0	0	4	0	0	4	5	0	0	0
FBgn0011725	0.272813	0.404841	0.412424	0.135366	0.162	0.144517	0.107158	0.120856	0.103615	315	532.688	517.754	225.237	280	275.926	185.247	251.762	219
FBgn0011726	12.6803	17.2411	19.5044	5.12011	6.0188	6.03434	4.26888	4.23535	4.60545	2404	3728	4003	1397	1706	1860	1204	1423	1578
FBgn0011737	0.0397339	0.059882	0.0937814	0.0216609	0.0116778	0.0421852	0.034644	0.0363088	0.0224804	34.4746	59.2569	84.2832	27.0474	15.1483	59.5081	44.7171	55.8291	35.251
FBgn0011739	0.283529	0.311408	0.353251	0.0890397	0.103594	0.0980551	0.0752847	0.0910964	0.0837438	562	704	758	254	307	316	222	320	300
FBgn0011740	0.598506	0.817384	0.808968	0.198876	0.273484	0.243715	0.147417	0.182898	0.188395	805	1254	1178	385	550	533	295	436	458
FBgn0011741	0.401425	0.518232	0.60741	0.106096	0.202609	0.154504	0.100981	0.145914	0.143079	163	240	267	62	123	102	61	105	105
FBgn0011742	0.48078	0.807465	0.958	0.108452	0.230619	0.245642	0.059955	0.119049	0.140649	373	714.001	798	120	266	303.999	68	159	192
FBgn0011743	0	0	0	0	0	0	0	0	0	0	0	0	0	0	0	0	0	0
FBgn0011745	0.76061	0.905471	1.14972	0.301115	0.335948	0.357254	0.234935	0.252079	0.322563	341.67	463.899	559.093	194.665	225.621	260.915	157	200.674	261.872
FBgn0011746	0.00637318	0.0480558	0.0506305	0.0115405	0.00201924	0	0.00514082	0.00359625	0.00282114	5	43	43	13	2	0	6	5	4
FBgn0011747	0.115349	0.169523	0.189423	0.0344652	0.0624128	0.0760948	0.0470416	0.0537142	0.0594535	201	341	357	89	163	218	124	166	191
FBgn0011754	0.433841	0.547475	0.524125	0.195192	0.25304	0.163372	0.164523	0.151308	0.156972	333.671	466.001	430.001	212	281	199	198	193.819	210
FBgn0011758	0.00336527	0.00295051	0.00932609	0.00545604	0.00150057	0.00413967	0	0	0.00248269	3	3	9	7	2	6	0	0	4
FBgn0011760	15.0078	22.5988	24.9919	6.93562	7.05207	6.44224	5.51621	5.5394	5.28389	7833.53	13546.8	14099.6	5149.34	5820.21	5779.1	4216.6	5119.92	5145.29
FBgn0011761	0	0.00865227	0	0	0	0	0.00331663	0	0	0	2	0	0	0	0	1	0	0
FBgn0011762	0.0763554	0.108564	0.129629	0.0229429	0.0400288	0.0279244	0.0166461	0.00698683	0.0045674	37	60	68	16	29	22	12	6	4
FBgn0011763	0.573183	0.587387	0.884052	0.202353	0.246523	0.222697	0.212041	0.251169	0.206605	461	538	770	234	295	290	254	357	300
FBgn0011766	4.47946	4.98749	5.51925	1.08414	1.57312	1.42542	1.01695	1.11833	1.16255	6248	7987	8334	2175	3293	3252	2107	2768	2946
FBgn0011768	1.30678	2.22184	2.15953	0.60419	0.461953	0.490506	0.582821	0.50327	0.515488	526	1020	941	350	278	321	349	359	375
FBgn0011769	0.152737	0.319147	0.3478	0.115085	0.202418	0.122368	0.128546	0.15585	0.175583	27.8763	66.4333	68.7173	30.2287	55.2337	36.3108	34.9025	50.409	57.9164
FBgn0011770	1.91544	3.80843	3.9621	0.559315	0.757626	0.751058	0.333532	0.345939	0.334782	539.967	1224.47	1209.13	226.917	319.314	344.231	139.876	172.826	170.566
FBgn0011771	0.0932396	0.129556	0.148173	0.0411784	0.0459806	0.0408245	0.0361177	0.0374531	0.0367256	118	187	203	75	87	84	68	84	84
FBgn0011774	0.0244648	0.0361978	0.0437862	0.00318737	0.01125	0.0225713	0.00308345	0.00862804	0.00846044	16	27	31	3	11	24	3	10	10
FBgn0011785	0.0360618	0.0546782	0.0645946	0.0149244	0.0259359	0.0245934	0.0185202	0.0073786	0.0175098	89.8608	155.396	174.247	53.5216	96.6243	99.6365	68.6553	32.5841	78.8556
FBgn0011787	1.94076	3.72981	3.98286	0.408204	0.403464	0.583944	0.54298	0.488365	0.310545	370	811	822	112	115	181	154	165	107
FBgn0011802	0.0385848	0.0422885	0.0591344	0.0255919	0.0199425	0.0161696	0.015326	0.01435	0.00824867	47	56	75	42	34	35	27	32	18
FBgn0011812	0	0	0	0	0	0	0	0	0	0	0	0	0	0	0	0	0	0
FBgn0011817	0.371156	0.46207	0.402629	0.0923196	0.124976	0.096837	0.0706407	0.101468	0.0968614	463	662.999	525	153	204	198	118	206	215
FBgn0011818	0.038332	0.0688576	0.0509546	0.0142919	0.0237628	0.0218516	0.0201104	0.0179369	0.0144846	41	84	59	22.0001	38	38	32	34	28
FBgn0011822	0	0	0	0	0	0	0	0	0	0	0	0	0	0	0	0	0	0
FBgn0011824	3.89395	8.08742	9.17862	0.546841	1.14758	0.835052	1.04047	0.879744	1.39717	1044	2473	2664	211	460	364	415	418	677
FBgn0011826	0.26291	0.272725	0.279427	0.104849	0.0873063	0.0922417	0.0827626	0.0608511	0.0778582	367	452	454.757	199	171	213	155	166	196
FBgn0011828	0.154535	0.167318	0.163667	0.0649091	0.0546359	0.0704109	0.0519788	0.0617408	0.0621887	261.583	322.906	303.589	154.685	136.512	199.487	128.389	178.838	190.704
FBgn0011829	0.00145432	0	0	0	0	0.000774233	0	0	0	2.31068	0	0	0	0	2	0	0	0
FBgn0011832	0	0	0	0	0	0	0	0	0	0	0	0	0	0	0	0	0	0
FBgn0011834	0	0	0	0	0.00538751	0	0	0	0	0	0	0	0	2	0	0	0	0
FBgn0011836	0.11539	0.12943	0.170279	0.0692489	0.0350838	0.0502367	0.0710206	0.0374961	0.0542964	153.991	197	246	133	70	109	141	88	130
FBgn0011837	0.428847	0.554518	0.626298	0.254841	0.271387	0.206791	0.224208	0.23384	0.270044	621	966	1153	399	582	572	469	657	736
FBgn0011840	0	0	0	0	0	0	0	0	0	0	0	0	0	0	0	0	0	0
FBgn0011844	0	0	0	0	0	0	0	0	0	0	0	0	0	0	0	0	0	0
FBgn0011845	0	0	0	0	0	0	0	0	0	0	0	0	0	0	0	0	0	0
FBgn0011848	0	0	0	0	0	0	0	0	0	0	0	0	0	0	0	0	0	0
FBgn0011849	0	0	0	0	0	0	0	0	0	0	0	0	0	0	0	0	0	0
FBgn0011850	0	0	0	0	0	0	0	0	0	0	0	0	0	0	0	0	0	0
FBgn0011851	0	0	0	0	0	0	0	0	0	0	0	0	0	0	0	0	0	0
FBgn0011852	0	0	0	0	0	0	0	0	0	0	0	0	0	0	0	0	0	0
FBgn0011853	0	0	0	0	0	0	0	0	0	0	0	0	0	0	0	0	0	0
FBgn0011854	0	0	0	0	0	0	0	0	0	0	0	0	0	0	0	0	0	0
FBgn0011855	0	0	0	0	0	0	0	0	0	0	0	0	0	0	0	0	0	0
FBgn0011858	0	0	0	0	0	0	0	0	0	0	0	0	0	0	0	0	0	0
FBgn0011859	0	0	0	0	0	0	0	0	0	0	0	0	0	0	0	0	0	0
FBgn0011860	0	0	0	0	0	0	0	0	0	0	0	0	0	0	0	0	0	0
FBgn0011861	0	0	0	0	0	0	0	0	0	0	0	0	0	0	0	0	0	0
FBgn0011862	0	0	0	0	0	0	0	0	0	0	0	0	0	0	0	0	0	0
FBgn0011863	0	0	0	0	0	0	0	0	0	0	0	0	0	0	0	0	0	0
FBgn0011864	0	0	0	0	0	0	0	0	0	0	0	0	0	0	0	0	0	0
FBgn0011865	0	0	0	0	0	0	0	0	0	0	0	0	0	0	0	0	0	0
FBgn0011866	0	0	0	0	0	0	0	0	0	0	0	0	0	0	0	0	0	0
FBgn0011867	0	0	0	0	0	0	0	0	0	0	0	0	0	0	0	0	0	0
FBgn0011868	0	0	0	0	0	0	0	0	0	0	0	0	0	0	0	0	0	0
FBgn0011869	0	0	0	0	0	0	0	0	0	0	0	0	0	0	0	0	0	0
FBgn0011870	0	0	0	0	0	0	0	0	0	0	0	0	0	0	0	0	0	0
FBgn0011871	0	0	0	0	0	0	0	0	0	0	0	0	0	0	0	0	0	0
FBgn0011872	0	0	0	0	0	0	0	0	0	0	0	0	0	0	0	0	0	0
FBgn0011877	2.40574	4.92177	20.7414	0.557207	0	2.46615	0.539039	0	0.443709	3	7	28	1	0	5	1	0	1
FBgn0011878	0	0	0	0	0	0	0	0	0	0	0	0	0	0	0	0	0	0
FBgn0011879	0	0	0	0	0	0	0	0	0	0	0	0	0	0	0	0	0	0
FBgn0011880	0	0	0	0	0	0	0	0	0	0	0	0	0	0	0	0	0	0
FBgn0011881	0	0	0	0	0	0	0	0	0	0	0	0	0	0	0	0	0	0
FBgn0011882	0	0	0	0	0	0	0	0	0	0	0	0	0	0	0	0	0	0
FBgn0011883	0	0	0	0	0	0	0	0	0	0	0	0	0	0	0	0	0	0
FBgn0011884	0	0	0	0	0	0	0	0	0	0	0	0	0	0	0	0	0	0
FBgn0011885	0	0	0	0	0	0	0	0	0	0	0	0	0	0	0	0	0	0
FBgn0011887	0	0	0	0	0	0	0	0	0	0	0	0	0	0	0	0	0	0
FBgn0011888	0	0	0	0	0	0	0	0	0	0	0	0	0	0	0	0	0	0
FBgn0011889	0	0	0	0	0	0	0	0	0	0	0	0	0	0	0	0	0	0
FBgn0011890	0	0	0	0	0	0	0	0	0	0	0	0	0	0	0	0	0	0
FBgn0011891	0	0	0	0	0	0	0	0	0	0	0	0	0	0	0	0	0	0
FBgn0011892	0	0	0	0	0	0	0	0	0	0	0	0	0	0	0	0	0	0
FBgn0011893	0	0	0	0	0	0	0	0	0	0	0	0	0	0	0	0	0	0
FBgn0011894	0	0	0	0	0	0	0	0	0	0	0	0	0	0	0	0	0	0
FBgn0011895	0	0	0	0	0	0	0	0	0	0	0	0	0	0	0	0	0	0
FBgn0011896	0	0	0	0	0	0	0	0	0	0	0	0	0	0	0	0	0	0
FBgn0011897	0	0	0	0	0	0	0	0	0	0	0	0	0	0	0	0	0	0
FBgn0011902	0	0	0	0	0	0	0	0	0	0	0	0	0	0	0	0	0	0
FBgn0011904	0	0	0	0	0	0	0	0	0	0	0	0	0	0	0	0	0	0
FBgn0011905	0	0	0	0	0	0	0	0	0	0	0	0	0	0	0	0	0	0
FBgn0011906	0	0	0	0	0	0	0	0	0	0	0	0	0	0	0	0	0	0
FBgn0011909	0	0	0	0	0	0	0	0	0	0	0	0	0	0	0	0	0	0
FBgn0011910	0	0	0	0	0	0	0	0	0	0	0	0	0	0	0	0	0	0
FBgn0011915	0	0	0	0	0	0	0	0	0	0	0	0	0	0	0	0	0	0
FBgn0011916	0	0	0	0	0	0	0	0	0	0	0	0	0	0	0	0	0	0
FBgn0011919	0	0	0	0	0	0	0	0	0	0	0	0	0	0	0	0	0	0
FBgn0011921	0	0	0	0	0	0	0	0	0	0	0	0	0	0	0	0	0	0
FBgn0011927	0	0	0	0	0	0	0	0	0	0	0	0	0	0	0	0	0	0
FBgn0011928	0	0	0	0	0	0	0	0	0	0	0	0	0	0	0	0	0	0
FBgn0011931	0	0	0	0	0	0	0	0	0	0	0	0	0	0	0	0	0	0
FBgn0011932	0	0	0	0	0	0	0	0	0	0	0	0	0	0	0	0	0	0
FBgn0011933	0	0	0	0	0	0	0	0	0	0	0	0	0	0	0	0	0	0
FBgn0011934	0	0	0	0	0	0	0	0	0	0	0	0	0	0	0	0	0	0
FBgn0011935	0	0	0	0	0	0	0	0	0	0	0	0	0	0	0	0	0	0
FBgn0011936	0	0	0	0	0	0	0	0	0	0	0	0	0	0	0	0	0	0
FBgn0011937	0	0	0	0	0	0	0	0	0	0	0	0	0	0	0	0	0	0
FBgn0011938	0	0	0	0	0	0	0	0	0	0	0	0	0	0	0	0	0	0
FBgn0011944	0	0	0	0	0	0	0	0	0	0	0	0	0	0	0	0	0	0
FBgn0011945	0	0	0	0	0	0	0	0	0	0	0	0	0	0	0	0	0	0
FBgn0011948	0	0	0	0	0	0	0	0	0	0	0	0	0	0	0	0	0	0
FBgn0011949	0	0	0	0	0	0	0	0	0	0	0	0	0	0	0	0	0	0
FBgn0011950	0	0	0	0	0	0	0	0	0	0	0	0	0	0	0	0	0	0
FBgn0011951	0	0	0	0	0	0	0	0	0	0	0	0	0	0	0	0	0	0
FBgn0011952	0	0	0	0	0	0	0	0	0	0	0	0	0	0	0	0	0	0
FBgn0011953	0	0	0	0	0	0	0	0	0	0	0	0	0	0	0	0	0	0
FBgn0011954	0	0	0	0	0	0	0	0	0	0	0	0	0	0	0	0	0	0
FBgn0011955	0	0	0	0	0	0	0	0	0	0	0	0	0	0	0	0	0	0
FBgn0011956	0	0	0	0	0	0	0	0	0	0	0	0	0	0	0	0	0	0
FBgn0011957	0	0	0	0	0	0	0	0	0	0	0	0	0	0	0	0	0	0
FBgn0011958	0	0	0	0	0	0	0	0	0	0	0	0	0	0	0	0	0	0
FBgn0011959	0	0	0	0	0	0	0	0	0	0	0	0	0	0	0	0	0	0
FBgn0011960	0	0	0	0	0	0	0	0	0	0	0	0	0	0	0	0	0	0
FBgn0011961	0	0	0	0	0	0	0	0	0	0	0	0	0	0	0	0	0	0
FBgn0011962	0	0	0	0	0	0	0	0	0	0	0	0	0	0	0	0	0	0
FBgn0011963	0	0	0	0	0	0	0	0	0	0	0	0	0	0	0	0	0	0
FBgn0011965	0	0	0	0	0	0	0	0	0	0	0	0	0	0	0	0	0	0
FBgn0011966	0	0	0	0	0	0	0	0	0	0	0	0	0	0	0	0	0	0
FBgn0011970	0	0	0	0	0	0	0	0	0	0	0	0	0	0	0	0	0	0
FBgn0011971	0	0	0	0	0	0	0	0	0	0	0	0	0	0	0	0	0	0
FBgn0011974	0	0	0	0	0	0	0	0	0	0	0	0	0	0	0	0	0	0
FBgn0011975	0	0	0	0	0	0	0	0	0	0	0	0	0	0	0	0	0	0
FBgn0011976	0	0	0	0	0	0	0	0	0	0	0	0	0	0	0	0	0	0
FBgn0011977	0	0	0	0	0	0	0	0	0	0	0	0	0	0	0	0	0	0
FBgn0011980	0	0	0	0	0	0	0	0	0	0	0	0	0	0	0	0	0	0
FBgn0011981	0	0	0	0	0	0	0	0	0	0	0	0	0	0	0	0	0	0
FBgn0011982	0	0	0	0	0	0	0	0	0	0	0	0	0	0	0	0	0	0
FBgn0011983	0	0	0	0	0	0	0	0	0	0	0	0	0	0	0	0	0	0
FBgn0011984	0	0	0	0	0	0	0	0	0	0	0	0	0	0	0	0	0	0
FBgn0011985	0	0	0	0	0	0	0	0	0	0	0	0	0	0	0	0	0	0
FBgn0011986	0	0	0	0	0	0	0	0	0	0	0	0	0	0	0	0	0	0
FBgn0011987	0	0	0	0	0	0	0	0	0	0	0	0	0	0	0	0	0	0
FBgn0011993	0	0	0	0	0	0	0	0	0	0	0	0	0	0	0	0	0	0
FBgn0011994	0	0	0	0	0	0	0	0	0	0	0	0	0	0	0	0	0	0
FBgn0011998	0	0	0	0	0	0	0	0	0	0	0	0	0	0	0	0	0	0
FBgn0011999	0	0	0	0	0	0	0	0	0	0	0	0	0	0	0	0	0	0
FBgn0012000	0	0	0	0	0	0	0	0	0	0	0	0	0	0	0	0	0	0
FBgn0012001	0	0	0	0	0	0	0	0	0	0	0	0	0	0	0	0	0	0
FBgn0012002	0	0	0	0	0	0	0	0	0	0	0	0	0	0	0	0	0	0
FBgn0012003	0	0	0	0	0	0	0	0	0	0	0	0	0	0	0	0	0	0
FBgn0012004	0	0	0	0	0	0	0	0	0	0	0	0	0	0	0	0	0	0
FBgn0012009	0	0	0	0	0	0	0	0	0	0	0	0	0	0	0	0	0	0
FBgn0012010	0	0	0	0	0	0	0	0	0	0	0	0	0	0	0	0	0	0
FBgn0012011	0	0	0	0	0	0	0	0	0	0	0	0	0	0	0	0	0	0
FBgn0012016	0	0	0	0	0	0	0	0	0	0	0	0	0	0	0	0	0	0
FBgn0012017	0	0	0	0	0	0	0	0	0	0	0	0	0	0	0	0	0	0
FBgn0012018	0	0	0	0	0	0	0	0	0	0	0	0	0	0	0	0	0	0
FBgn0012024	0	0	0	0	0	0	0	0	0	0	0	0	0	0	0	0	0	0
FBgn0012025	0	0	0	0	0	0	0	0	0	0	0	0	0	0	0	0	0	0
FBgn0012026	0	0	0	0	0	0	0	0	0	0	0	0	0	0	0	0	0	0
FBgn0012027	0	0	0	0	0	0	0	0	0	0	0	0	0	0	0	0	0	0
FBgn0012028	0	0	0	0	0	0	0	0	0	0	0	0	0	0	0	0	0	0
FBgn0012034	0.733761	1.19678	0.934115	0.338074	0.283212	0.247937	0.243078	0.292353	0.269939	604	1087	868	391.001	367	347	308.001	457	426
FBgn0012036	1.1967	1.72836	1.71345	0.340695	0.279039	0.309756	0.210042	0.264481	0.229914	720	1186	1116	295	251	303	188	282	251
FBgn0012037	0.492781	0.749213	0.752842	0.197196	0.216382	0.193053	0.21871	0.257873	0.17973	318	551	524	182	208	203	209	296	209
FBgn0012042	0.00478378	0	0	0	0	0	0	0.00269937	0.00794079	1	0	0	0	0	0	0	1	3
FBgn0012051	0.0435291	0.0791144	0.0588348	0.0136107	0.00946236	0.0120986	0.0109725	0.00874173	0.0109908	40	80.9999	58	18	13	17	15	14	18
FBgn0012058	0.211599	0.229264	0.253434	0.0827386	0.058657	0.0524548	0.050296	0.0562949	0.0614338	263	325	341	148	109	106	93	124	138
FBgn0012344	0	0	0	0	0	0	0	0	0	0	0	0	0	0	0	0	0	0
FBgn0013263	0.306582	0.396487	0.548756	0.0972424	0.113417	0.101229	0.0575451	0.059708	0.084842	346.073	538.92	688.231	131.7	201	211.764	99.7749	140.878	189.593
FBgn0013269	1.49328	2.75381	2.88704	0.385753	0.263023	0.350947	0.400818	0.255252	0.331355	581	1222	1216	216	153	222	232	176	233
FBgn0013272	0.261994	0.353347	0.389298	0.118548	0.0982289	0.112247	0.0875313	0.106559	0.105247	363.725	559.482	587.071	236.857	203.884	255.357	180.78	262.167	266.069
FBgn0013275	0.188643	0.274523	0.00611688	0	7.9e-05	0	0	0.00638897	0	145.659	241.756	5.11295	0	0.0911955	0	0	8.74249	0
FBgn0013276	4.07771	3.12689	0.441538	0.0225699	0.00426592	0.00719225	0.0209606	0.00971969	0.0158159	3138.46	2744.84	367.887	25	4.9088	9	24	13.2575	22
FBgn0013277	0.074155	0.0205306	0.00210701	0.00369784	0	0	0	0	0	55.7367	17.5998	1.71441	3.99999	0	0	0	0	0
FBgn0013278	1.01532	0.442036	0.274011	5.65e-09	0.0202483	0.00694661	0.00530846	0.00247899	0.00511627	771.398	383.034	225.367	6.17e-06	23	8.58076	6	3.33779	7.02519
FBgn0013279	0.224605	0.105153	0.0846885	0	0	0.00112847	0	0.0048598	0.004989	173.744	92.7719	70.9187	0	0	1.41924	0	6.66221	6.97481
FBgn0013300	0	0	0	0	0	0.0039165	0	0	0	0	0	0	0	0	1	0	0	0
FBgn0013301	0.00589003	0	0.0272045	0	0	0.00724553	0	0	0.00651806	1	0	5	0	0	2	0	0	2
FBgn0013303	0.190803	0.424117	0.391745	0.148739	0.119675	0.06647	0.0841619	0.116231	0.151253	47.2415	119.765	105	53	44.3002	26.7573	31	51	67.6817
FBgn0013305	1.93203	2.82719	3.13637	0.735581	1.27878	1.30062	0.833385	1.1106	1.36893	963.936	1608.73	1691.89	525.595	961	1058.88	628.808	988.751	1239
FBgn0013307	0.104612	0.218724	0.309729	0.0652342	0.0663829	0.0989902	0.104578	0.108979	0.120219	39	93	125	35	37	60	58	72	81
FBgn0013308	0	0	0	0	0	0	0	0	0	0	0	0	0	0	0	0	0	0
FBgn0013323	0.00596459	0	0	0	0	0	0	0.00336567	0	1	0	0	0	0	0	0	1	0
FBgn0013325	37.5948	54.9962	57.4917	11.8254	14.2992	12.8667	9.48727	9.03809	10.3809	6954.01	11645	11556	3122	3960	3954	2613	2973.99	3492
FBgn0013334	1.13452	1.37049	1.65254	0.56478	0.698135	0.590097	0.533003	0.742524	0.580628	1867	2471.01	2982	1280	1698	1635	1216	2061	1644
FBgn0013342	0.037282	0.0366737	0.0505619	0.0345404	0.0270146	0.0234199	0.0647399	0.0249351	0.0323877	15	22.9999	24	24	16	18	35	24	29
FBgn0013343	1.08639	1.24057	1.264	0.698263	0.552772	0.4757	0.53379	0.547344	0.507371	1009.93	1388.89	1319.48	915.534	756.696	743.746	756.184	895.297	898.66
FBgn0013347	4.32198	5.2602	5.5919	1.86579	2.04031	1.72229	2.21868	2.43115	1.96103	639	887	895	397	451	414	488	637	524
FBgn0013348	0	0	0.00932172	0	0	0.00559141	0	0	0.00251501	0	0	6	0	0	2	0	0	1
FBgn0013432	1.16339	1.44418	1.25562	0.30441	0.344455	0.324506	0.238087	0.232066	0.337124	225.912	319.844	263.948	85.0712	100.002	102.451	68.779	79.8609	118.313
FBgn0013433	0.00107051	0.00187722	0	0	0	0	0	0	0	1	2	0	0	0	0	0	0	0
FBgn0013435	0.386995	0.537247	0.670286	0.136319	0.186945	0.0958724	0.0867116	0.147097	0.0877336	144	228	270	73	104	58	48	97	59
FBgn0013467	0	0.0101061	0	0	0.0066081	0.00202554	0	0.000929135	0.00182217	0	7	0	0	6	2	0	1	2
FBgn0013469	0.0227753	0.00107941	0.00796057	0.0115482	0.000411717	0.00227162	0.00537897	0.000347338	0.0037465	37	2	14	27	1	6	13	1	11
FBgn0013531	0.0371114	0.15382	0.155825	0.009377	0.0767238	0.0498022	0	0.0247484	0.0616026	11	52	50	4	34	24	0	13	33
FBgn0013548	0.0656688	0.0858616	0.0798177	0.0208136	0.0285117	0.0255099	0.014714	0.0104015	0.0101994	57	85	75	26	37	36	19	16	16
FBgn0013563	0.0137689	0.0316321	0.0139841	0.00319324	0.00937624	0.011357	0.000617825	0.0045319	0.00135002	14.9805	39.2517	16.4706	5	15.2518	20.0894	1	8.73811	2.65459
FBgn0013576	4.82837	5.32299	5.91699	1.89937	2.16538	2.12842	1.94515	2.02393	1.97289	4447.3	5546.03	5915.57	2517.56	2941.85	3067.7	2684	3280.99	3254.32
FBgn0013672	65.311	112.591	117.688	17.2594	31.6467	31.2678	17.008	23.2261	25.0129	10996	21620	21450	4182	7966	8559	4260	6930	7611
FBgn0013673	1.7098	10.7938	18.3213	1.42566	4.57447	8.41312	0.459725	4.2451	2.08132	5	36	58	6	20	40	2	22	11
FBgn0013674	63.9475	95.5656	101.762	18.2651	35.6747	36.3809	18.929	21.3979	25.247	30241	51544	52096	12431	25223	27972	13317	17933	21578
FBgn0013675	116.288	183.926	196.174	31.7995	63.6214	61.875	29.5818	36.9978	45.6039	19990	36060	36506	7867	16351	17293	7565	11271	14168
FBgn0013676	57.8429	145.439	149.855	8.20421	57.6472	54.3724	8.24271	26.8231	36.7672	12071	34616	33854	2464	17986	18448	2559	9920	13867
FBgn0013678	26.53	54.7599	54.3988	4.12793	19.2791	19.8679	4.1777	10.3441	15.8552	8802	20721	19538	1971	9563	10717	2062	6082	9507
FBgn0013679	4.84829	14.4981	17.4485	0.682259	3.93536	4.33792	1.06835	1.7527	2.39724	1269	4328	4944	257	1540	1846	416	813	1134
FBgn0013680	0.424939	0.919438	1.00034	0.0714357	0.210877	0.278228	0.0621959	0.168234	0.140316	124	306	316	30	92	132	27	87	74
FBgn0013681	0.656643	2.44689	2.37574	0.0887185	0.805207	1.58186	0.0490434	0.154386	0.494532	36	153	141	7	66	141	4	15	49
FBgn0013683	1.47506	3.23331	4.17293	0.298942	0.966061	0.831659	0.268538	1.05777	0.833176	48	120	147	14	47	44	13	61	49
FBgn0013684	0.761746	1.52684	1.92518	0.102236	0.655254	0.847698	0.121437	0.256429	0.318432	409	935	1119	79	526	740	97	244	309
FBgn0013685	0.190794	0.973301	0.721003	0.0421821	0.232027	0.288043	0.104932	0.0929791	0.124763	22	128	90	7	40	54	18	19	26
FBgn0013686	0	0	0	0	0	0	0	0	0	0	0	0	0	0	0	0	0	0
FBgn0013688	0	0	0	0	0	0	0	0	0	0	0	0	0	0	0	0	0	0
FBgn0013689	0	0	0	0	0	0	0	0	0	0	0	0	0	0	0	0	0	0
FBgn0013690	0	0	0	0	0	0	0	0	0	0	0	0	0	0	0	0	0	0
FBgn0013691	0	0	0	0	0	0	0	0	0	0	0	0	0	0	0	0	0	0
FBgn0013692	0	0	0	0	0	0	0	0	0	0	0	0	0	0	0	0	0	0
FBgn0013693	0	0	0	0	0	0	0	0	0	0	0	0	0	0	0	0	0	0
FBgn0013694	0	0	0	0	0	0	0	0	0	0	0	0	0	0	0	0	0	0
FBgn0013695	0	0	0	0	0	0	0	0	0	0	0	0	0	0	0	0	0	0
FBgn0013696	0	0	0	0	0	0	0	0	0	0	0	0	0	0	0	0	0	0
FBgn0013697	0	0	0	0	0	0	0	0	0	0	0	0	0	0	0	0	0	0
FBgn0013698	0	0	0	0	0	0	0	0	0	0	0	0	0	0	0	0	0	0
FBgn0013699	0	0	0	0	0	0	0	0	0	0	0	0	0	0	0	0	0	0
FBgn0013700	0	0	0	0	0	0	0	0	0	0	0	0	0	0	0	0	0	0
FBgn0013701	0	0	0	0	0	0	0	0	0	0	0	0	0	0	0	0	0	0
FBgn0013702	0	0	0	0	0	0	0	0	0	0	0	0	0	0	0	0	0	0
FBgn0013703	0	0	0	0	0	0	0	0	0	0	0	0	0	0	0	0	0	0
FBgn0013704	0	0	0	0	0	0	0	0	0	0	0	0	0	0	0	0	0	0
FBgn0013705	0	0	0	0	0	0	0	0	0	0	0	0	0	0	0	0	0	0
FBgn0013706	0	0	0	0	0	0	0	0	0	0	0	0	0	0	0	0	0	0
FBgn0013707	0	0	0	0	0	0	0	0	0	0	0	0	0	0	0	0	0	0
FBgn0013708	0	0	0	0	0	0	0	0	0	0	0	0	0	0	0	0	0	0
FBgn0013709	0	0	0	0	0	0	0	0	0	0	0	0	0	0	0	0	0	0
FBgn0013710	0	0	0	0	0	0	0	0	0	0	0	0	0	0	0	0	0	0
FBgn0013717	0.107414	0.100399	0.159132	0.0337975	0.0515116	0.0336567	0.0306521	0.0397263	0.0342023	106	113	170	48	76	54	45	67	61
FBgn0013718	0.284781	0.358605	0.398746	0.113379	0.117309	0.113794	0.119945	0.143457	0.119047	320	465	490	179	199	208	200	292	244
FBgn0013720	0.420191	0.554904	0.639731	0.187437	0.251557	0.196228	0.235374	0.34541	0.312867	162	244	267	104	145	123	135	236	218
FBgn0013725	0	0.00151151	0	0	0	0	0.0023176	0	0	0	1	0	0	0	0	2	0	0
FBgn0013726	0.3084	0.402845	0.406978	0.110207	0.135554	0.0874883	0.0879985	0.0795532	0.0995993	248	373	356	135	177	120	111	125	156
FBgn0013732	0.00273601	0.000884681	0	0.000633704	0	0.00168283	0.00367825	0.00257311	0.00252312	3	1	0	1	0	3	6	5	5
FBgn0013733	0.223183	0.291766	0.33006	0.0852106	0.106358	0.0912944	0.0841056	0.0991205	0.0961672	1573	2270	2483	862	1074	1048	895	1240	1219
FBgn0013746	0.380899	0.481617	0.38865	0.152872	0.13413	0.150616	0.209167	0.130577	0.159473	180	269	204.62	107	98	121.664	155	113	139.874
FBgn0013749	20.4333	30.888	32.2001	6.6959	9.41865	8.89902	4.08282	4.20983	5.38625	4899	8858	8917	2092	3364	3582	1431	1929	2339
FBgn0013750	0.35718	0.433091	0.49531	0.0801599	0.134592	0.117261	0.0928371	0.118274	0.0997938	200	304	330	71	118	109	85	129	111
FBgn0013751	0.0230479	0.0552358	0.0326454	0.00747357	0.0123327	0.0113408	0.019624	0.0138724	0.009352	15	41	23	7	12	12	19	16	11
FBgn0013753	0.0135533	0.0213902	0.0475754	0.00565048	0.00181306	0.0050017	0.00546624	0.0122364	0.0134986	5	9	19	3	1	3	3	8	9
FBgn0013755	0.0155626	0	0	0	0	0	0.00697405	0	0	3	0	0	0	0	0	2	0	0
FBgn0013756	0.242378	0.298909	0.375945	0.107025	0.101273	0.102991	0.116937	0.103331	0.097122	643	911	1088	408	406	449	456	491	466
FBgn0013759	0.095778	0.132135	0.169705	0.0832245	0.0704059	0.0382341	0.0446827	0.0427855	0.0582152	134	228	254	135	135	98	100	120	139
FBgn0013762	0.0744533	0.112917	0.122682	0.0573265	0.0740256	0.0433185	0.0311102	0.0363348	0.041196	37	64	66	41	55	35	23	32	37
FBgn0013763	0.613055	1.26715	1.01001	0.0717285	0.081728	0.0932957	0.0368191	0.035663	0.0338046	291	686	520	49	62	72	26	30	29
FBgn0013764	0.215784	0.296024	0.248353	0.0550789	0.0706922	0.0821612	0.0542698	0.0741823	0.059292	147	230	186	54	72	91	55	91	73
FBgn0013765	0.0260469	0.0482974	0.0525634	0.0133276	0.0124039	0.0134348	0.00693421	0.00865847	0.0102591	40	84	89	30	23	34	16	24	29
FBgn0013767	0.00621366	0	0	0	0	0	0	0	0	1	0	0	0	0	0	0	0	0
FBgn0013770	2.15124	4.38775	5.2057	0.959702	2.78158	2.73175	1.73616	2.81024	3.0609	977.478	2273.06	2559.34	628.292	1861.61	1944.68	1171.19	2188.65	2498.65
FBgn0013771	0.00179336	0.00421339	0	0.00329977	0.0109301	0.00832186	0	0.00560387	0.00691926	1.11958	3	0	2.96469	10.2018	8.44663	0	6.19988	7.80683
FBgn0013772	0	0	0	0	0	0	0	0	0	0	0	0	0	0	0	0	0	0
FBgn0013773	0.00806853	0	0.0135028	0.00909482	0.0118728	0.0109179	0.0108472	0.0218538	0.0116075	5	0	9	7	11	11	10	24	13
FBgn0013799	0.203484	0.66634	0.495552	0.0359392	0.208278	0.259794	0.0321225	0.1183	0.127943	185	566	441	62	233	315	51	168	184
FBgn0013810	0	0.000826086	0.000217582	0	0	0.000434623	0	0	0	0	4	1	0	0	3	0	0	0
FBgn0013811	0	0.00145927	0	0.00066083	0.000318059	0.000438717	0.000319642	0.000134162	0	0	7	0	4	2	3	2	1	0
FBgn0013812	0	0.000719383	0.00189493	0	0.0004116	0	0	0.00011575	0.000227044	0	4	10	0	3	0	0	1	2
FBgn0013813	0	0	0	0	0	0.000130629	0	0	0	0	0	0	0	0	1	0	0	0
FBgn0013949	0.0274191	0.0721225	0.0534709	0.021169	0.0224151	0.0206122	0.0102394	0.0137528	0.0101142	12	30	21	13	13	13	5	11	6
FBgn0013953	0.0559716	0.0547818	0.0669459	0.0162803	0.0452729	0.0200152	0.0332488	0.0616977	0.0288091	46	50	58	20	55	27	40	85	41
FBgn0013954	24.4613	32.2939	28.385	7.79003	5.9432	4.98038	4.25626	2.65397	3.59004	3755	5654	4717	1721	1364	1243	972	722	996
FBgn0013972	0	0	0.00242379	0	0	0	0.00352748	0.00148058	0	0	0	2	0	0	0	4	2	0
FBgn0013973	0.0422115	0.0499225	0.0379114	0.0293325	0.0126052	0.0212008	0.0168051	0.01986	0.0156133	57.7359	77.8782	56.1347	57.7399	25.7768	47.1461	34.195	48.1397	38.5956
FBgn0013981	21.1256	27.407	27.5745	9.87235	10.7299	9.98467	15.8302	12.6409	14.645	2647	3918	3739	1779	2011	2035	2949	2805	3319
FBgn0013983	0.322821	0.267569	0.291217	0.0911267	0.0843451	0.0992786	0.0745932	0.0754257	0.113034	132	124	127	55	54	71	50	57	81
FBgn0013987	0.338144	0.501849	0.5013	0.185675	0.215139	0.201894	0.18849	0.175914	0.154243	217	350	339	166	195	202	175	190	174
FBgn0013995	0.0890348	0.112883	0.124028	0.017865	0.0354905	0.0409986	0.0105615	0.0244484	0.0248225	194	282	289	56	107	141	35	91	96
FBgn0013997	0.127615	0.218032	0.240726	0.0443366	0.049858	0.047682	0.0408868	0.03937	0.0346456	214	417	437	107	125	130	102	117	105
FBgn0014000	0.0202813	0.0462344	0.0524575	0.0225479	0.0406962	0.0274436	0.0245393	0.0434881	0.00673315	5	13	14	8	15	11	9	19	3
FBgn0014006	0.14853	0.174767	0.226892	0.0674634	0.0937552	0.0703955	0.0596451	0.0616796	0.0597699	231	310	382	155	218	178	138	170	168
[truncated: 16,350 more rows]

## Sheet: Table S3
Table S3. Gene expression quantifications of GT28 annotated genes
	TPM values			count values
[truncated: 19 more rows]

## Sheet: Table S4
Table S4. Statstics of all datasets
[truncated: 256 more rows]
