# Supplementary material for: Galactoside in the male ejaculate evaluated as a nuptial gift by the female nutrient sensing neurons
Source: Research Square preprint supplement (doi:10.21203/rs.3.rs-2137467/v1), 2023-01-17
Supplement: Supplementary file 2 [file eda0d001e265622664a7bcca.docx]

Supplementary information (Supplementary Table S5, Figures S1-S4)

Eleven carbon signals were observed in the 13C NMR spectrum and six signals were matched with galactose signals in the reference1. The anomeric proton coupling constant (*J*=7.86) indicated that H-1 of galactose is in the β-conformation. Two carbon signals at 39.96 and 62.00 ppm that did not correlate with other carbons were assigned as C-A1 and C-A2 carbons in aminoethyl moiety. Three signals that were well-correlated with each other were assigned as a glyceryl moiety. Correlation peaks between C-G1 of the glyceryl moiety and H-1 of galactose in the 13C-1H HMBC spectrum indicated that the glyceryl moiety is attached to C-1 of the galactose. The 31P resonance at 0.13 ppm is typical of a phosphodiester compound and its correlation peaks in the 31P-1H HMQC spectrum indicated that the phosphate group is esterified with two different moieties. This correlation was further confirmed by carbon-phosphorus splitting in the carbon signals at 62.00 (*J*=4.36) and 73.85 (*J*=4.95) ppm. These were assigned to C-A1 of the aminoethyl moiety and C-4 of the galactose moiety, respectively.

Reference

1. Bubb, W. A. NMR spectroscopy in the study of carbohydrates: Characterizing the structural complexity. *Concepts Magn. Reson. Part A Bridg. Educ. Res.* (2003).

Supplementary Table S5. The complete NMR assignment of native MS377, 1-O-[4-O-(2-aminoethylphosphate)-β-D-galactopyranosyl]-x-glycerol

| Moiety | 13C NMR |  | 1H NMR | |  | 31P NMR | |
| --- | --- | --- | --- | --- | --- | --- | --- |
| δ (ppm) |  | δ (ppm) | multiplicity  *JH,H* (Hz) |  | δ (ppm) | multiplicity  *J*P,C (Hz) |
| Galactose |  |  |  |  |  |  |  |
| C-1 | 102.92 |  | 4.46 | d,7.86 |  |  |  |
| C-2 | 70.60 |  | 3.58 | dd,7.86, 10.08 |  |  |  |
| C-3 | 71.83 |  | 3.77 | *m* |  |  | d, 2.18 |
| C-4 | 73.85 |  | 4.47 | dd, 9.72, 3.12 |  |  | d, 4.95 |
| C-5 | 74.40 |  | 3.78 | *m* |  |  | d, 3.10 |
| C-6 | 60.46 |  | 3.76 | *m* |  |  |  |
| Aminoethyl |  |  |  |  |  |  |  |
| C-A1 | 62.00 |  | 4.17 | *m* |  |  | d, 4.36 |
| C-A2 | 39.96 |  | 3.27 | d, 5.46 |  |  |  |
| Glycerol |  |  |  |  |  |  |  |
| C-G1 | 70.68 |  | 3.92  3.75 | *m*  *m* |  |  |  |
| C-G2 | 70.28 |  | 3.93 | *m* |  |  |  |
| C-G3 | 62.20 |  | 3.68  3.60 | dd*,* 11.64, 4.10  dd,11.64, 5.80 |  |  |  |
| Phosphate |  |  |  |  |  | 0.13 |  |


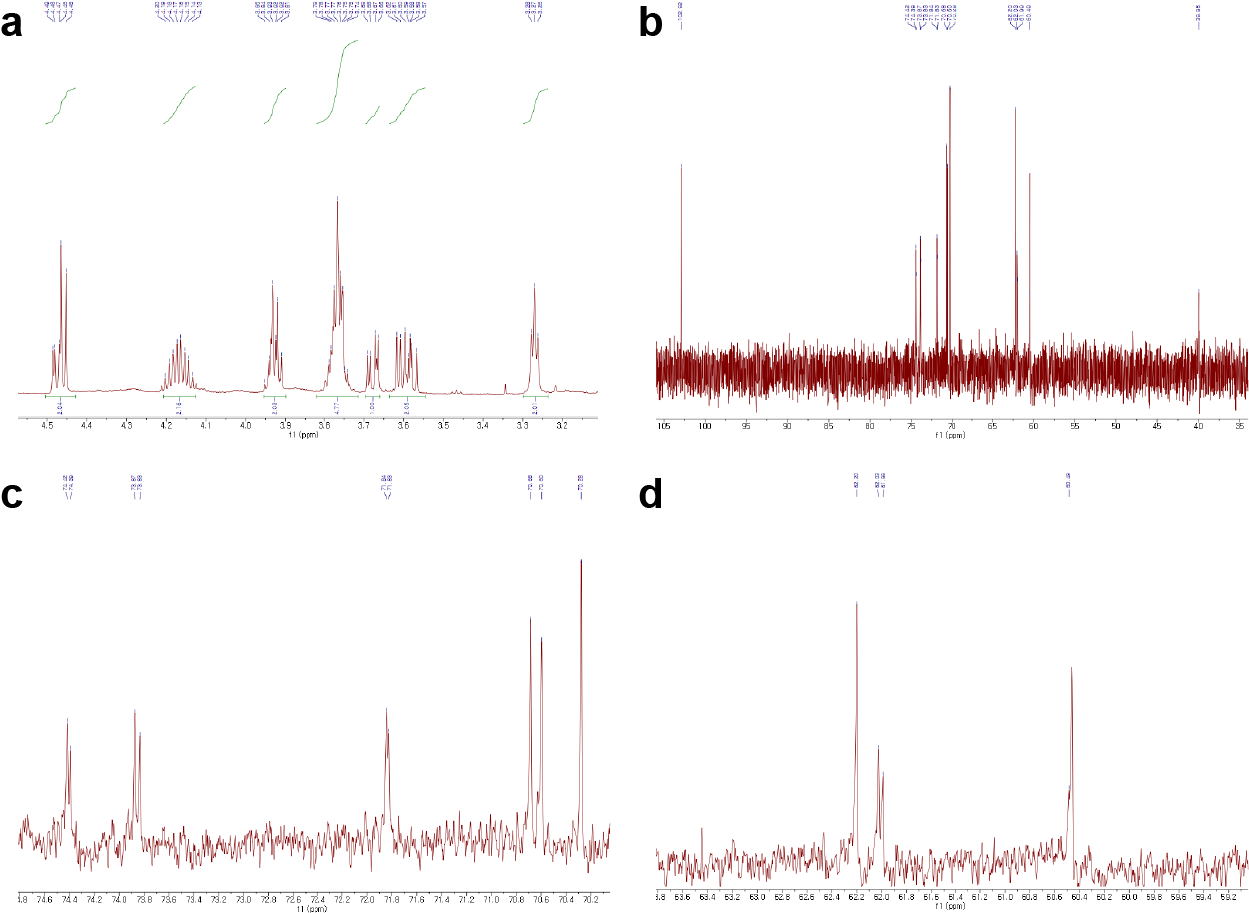


Supplementary Figure S1. NMR spectra of native MS377

(a) 1H NMR spectrum of native MS377.

(b-d) 13C NMR spectra of native MS377.


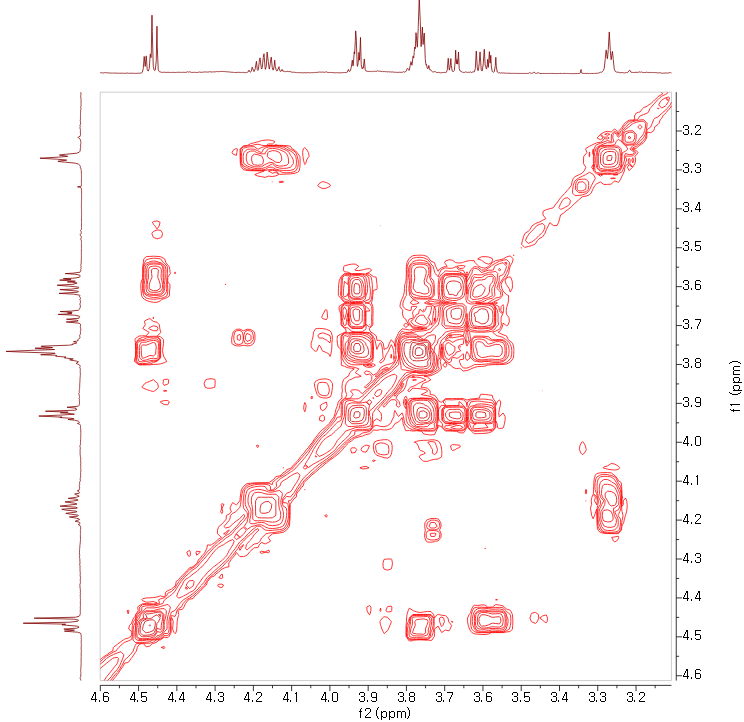


Supplementary Figure S2. 1H-1H COSY spectrum of native MS377


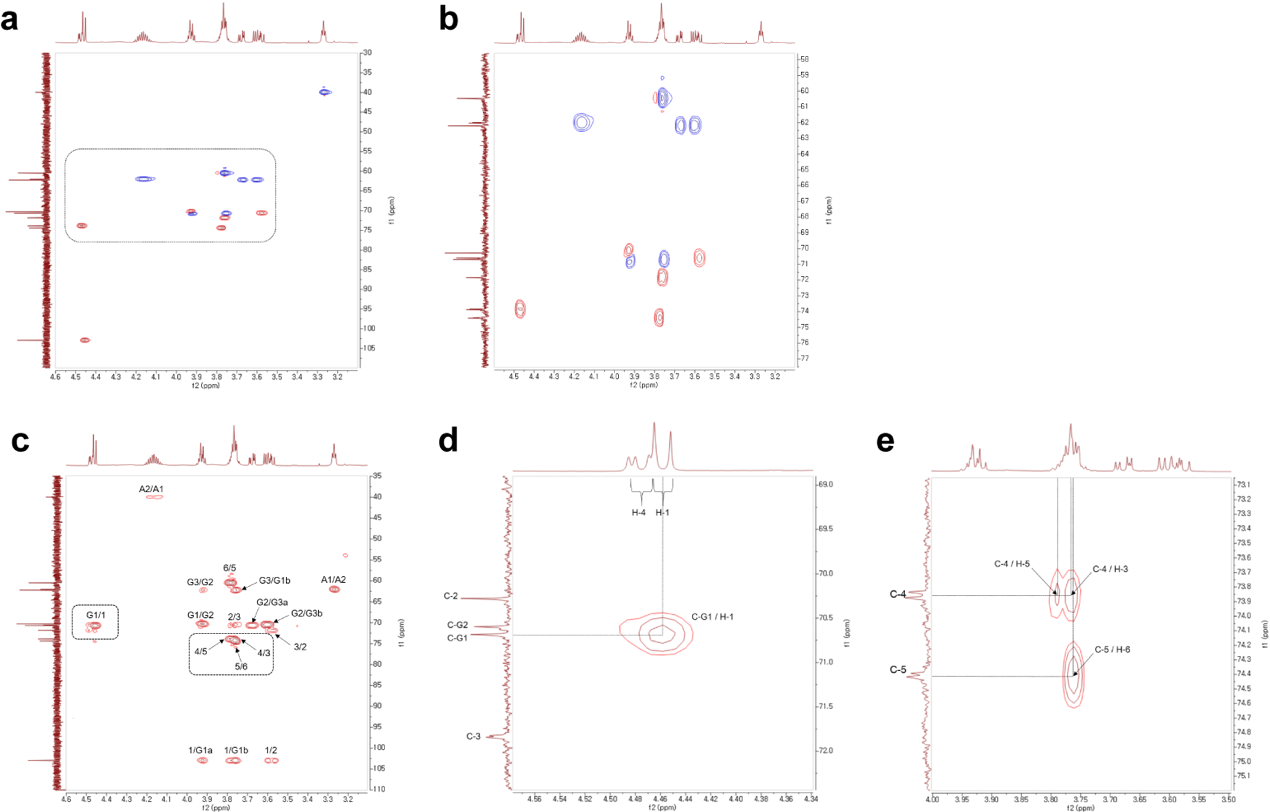


Supplementary Figure S3. Correlation spectra of native MS377

(a, b) 1H-13C HMQC correlation spectrum of native MS377. Expended spectrum (b)

(c, d, e) 1H-13C HMBC correlation spectrum of native MS377. Expanded spectrum (d, e)


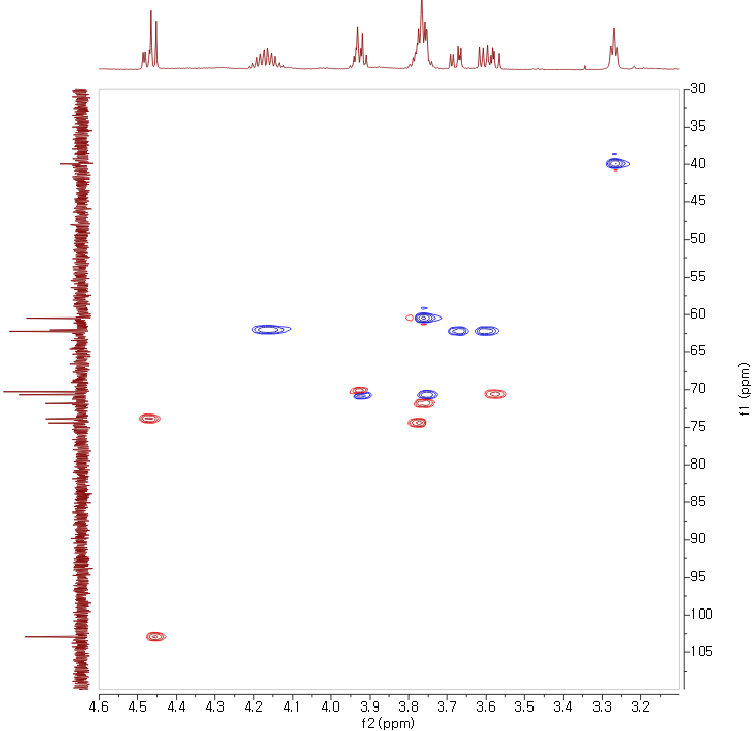

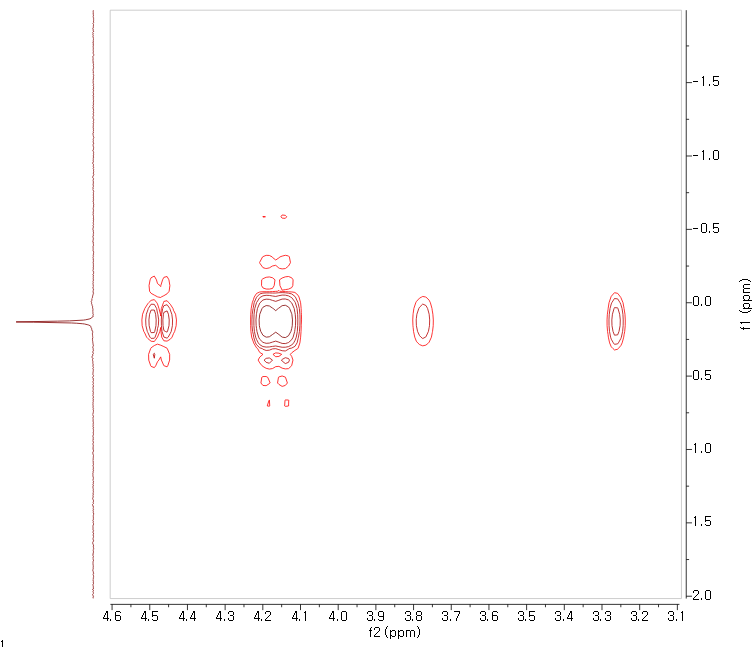


13C ppm

31P ppm

1H ppm

1

2

3,5

4

5

6

A1

A2

G1

G2

G3

A2

4

A1

3

Supplementary Figure S4. 1H-13C HMQC (top) and 1H-31P HMQC (bottom) correlation spectrum of native MS377
